# Supplementary material for: Non-decarbonylative photochemical versus thermal activation of Bu4N[Fe(CO)3(NO)] – the Fe-catalyzed Cloke–Wilson rearrangement of vinyl and arylcyclopropanes
Source: Royal Society of Chemistry journal article supplement (doi:10.1039/c5sc02342d), 2015-01-01
Supplement: c5sc02342d1.pdf [file c5sc02342d1.pdf]

# Non-decarbonylative photochemical versus thermal activation of $\text{Bu}_4\text{N}[\text{Fe}(\text{CO})_3(\text{NO})]$ – the Fe-catalyzed Cloke-Wilson rearrangement of vinyl and arylcyclopropanes

*Che-Hung Lin,<sup>[a]</sup> Dominik Pursley,<sup>[a]</sup> Johannes E. M. N. Klein,<sup>[a]</sup> Johannes Teske,<sup>[a]</sup> Jennifer A. Allen,<sup>[b]</sup> Fabian Rami,<sup>[a][c]</sup> Andreas Köhn<sup>[c]</sup> and Bernd Plietker<sup>[a]\*</sup>*

[a] Institut für Organische Chemie, Universität Stuttgart, Pfaffenwaldring 55, DE-70569 Stuttgart, Germany, e-mail: bernd.plietker@oc.uni-stuttgart.de

[b] Mettler-Toledo GmbH, Ockerweg 3, D-35396 Giessen, Germany

[c] Institut für Theoretische Chemie, Universität Stuttgart, Pfaffenwaldring 55, DE-70569 Stuttgart, Germany.

## Table of Contents

|                                                                                                                                           |                  |
|-------------------------------------------------------------------------------------------------------------------------------------------|------------------|
| <b>1. General Remarks</b>                                                                                                                 | <b>S2</b>        |
| <b>2. IR spectra of TBA[Fe]</b>                                                                                                           | <b>S2</b>        |
| <b>3. UV spectrum of TBA[Fe]</b>                                                                                                          | <b>S7</b>        |
| <b>4. Fluorescence spectrum of TBA[Fe]</b>                                                                                                | <b>S7</b>        |
| <b>5. Conversion-Time and Temperature-Time Plot for the Rearrangement of VCP 1 (measured by in-situ IR-spectroscopy)</b>                  | <b>S8</b>        |
| <b>6. Preparation of Vinylcyclopropanes</b>                                                                                               | <b>S8-19</b>     |
| <b>7. Preparation of Arylcyclopropanes</b>                                                                                                | <b>S19-24</b>    |
| <b>8. <math>\text{NBu}_4[\text{Fe}(\text{CO})_3(\text{NO})]</math> (TBAFe)-catalyzed Cloke-Wilson Rearrangement of Vinylcyclopropanes</b> | <b>S24-38</b>    |
| <b>9. <math>\text{NBu}_4[\text{Fe}(\text{CO})_3(\text{NO})]</math> (TBAFe)-catalyzed Cloke-Wilson Rearrangement of Arylcyclopropanes</b>  | <b>S38-45</b>    |
| <b>10. <math>^1\text{H}</math> and <math>^{13}\text{C}</math>-NMR Spectra</b>                                                             | <b>S46-96</b>    |
| <b>11. Additional Information for Crystals</b>                                                                                            | <b>S97-S144</b>  |
| <b>12. Computed Structures and Energies</b>                                                                                               | <b>S145-S151</b> |
| <b>13. References</b>                                                                                                                     | <b>S152</b>      |

## 1. General Remarks

All reactions sensitive to moisture and/or air were carried out under an atmosphere of dry nitrogen ( $N_2$ ) using anhydrous solvents. Solvents were either dried by passing them through commercially available columns (*n*-pentane,  $CH_2Cl_2$ ) or distilling them from  $CaH_2$  ( $CCl_4$ ,  $C_2H_2Cl_4$ ,  $C_2H_4Cl_2$ , PhH). THF was freshly distilled from Na/benzophenone (ketyl radical). IR spectra were recorded on a Bruker Vector 22 FT-IR spectrometer equipped with a Specac Golden Gate ATR unit. High resolution mass spectra (HRMS) were recorded using a Finnigan MAT 95 spectrometer (EI) or a Bruker micrOTOF-Q spectrometer (ESI). NMR spectra were recorded on a Bruker Avance 250MHz, 300 MHz or 500 MHz spectrometer and calibrated using the residual non-deuterated solvent signal or tetramethylsilane (TMS) as an internal standard. Column chromatography (CC) was carried out using silica gel (60 Dm, 0.040-0.063 mm) and thin layer chromatography (TLC) was carried out using silica gel plated aluminum sheets (silica gel 60,  $F_{254}$ ). High performance liquid chromatography (HPLC) was carried out using a K-501 pump and a K 2400 RI-detector in combination with a Eurospher-100 Si column by KNAUER. The photochemical reactions were carried out using a Heraeus Hg-Lamp (180 W), a ORIEL Xenon-Lamp (75 W), or a MEGAMAN Compact Fluorescent Lamp (23 W, 1395 Lumen).

## 2. IR spectra of TBA[Fe]

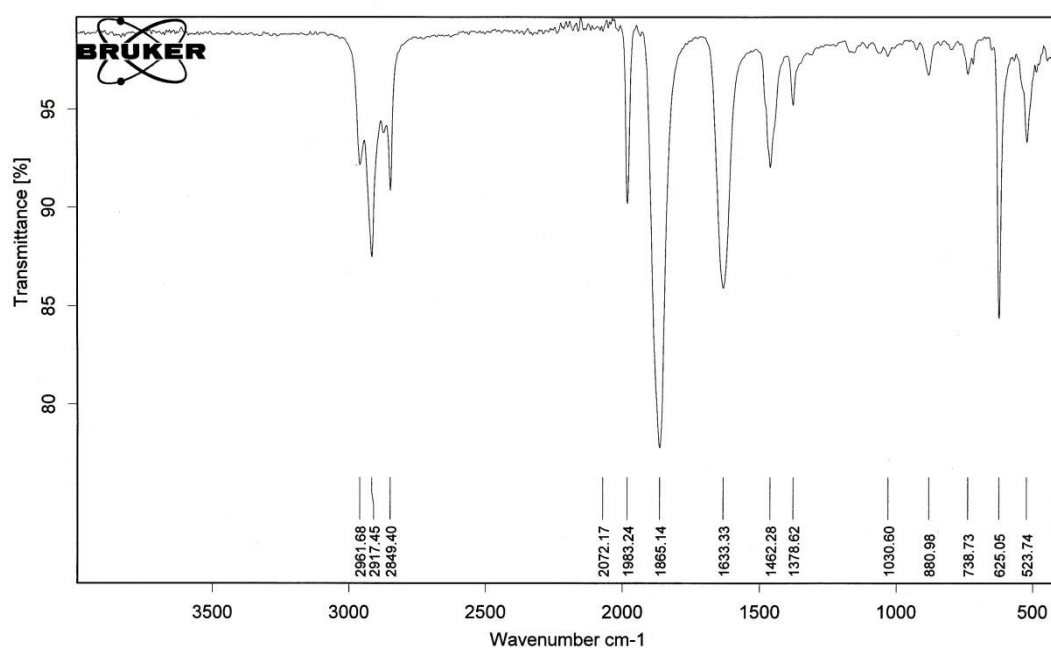

Figure S1: TBA[Fe] in  $CH_3CN$  - no irradiation.

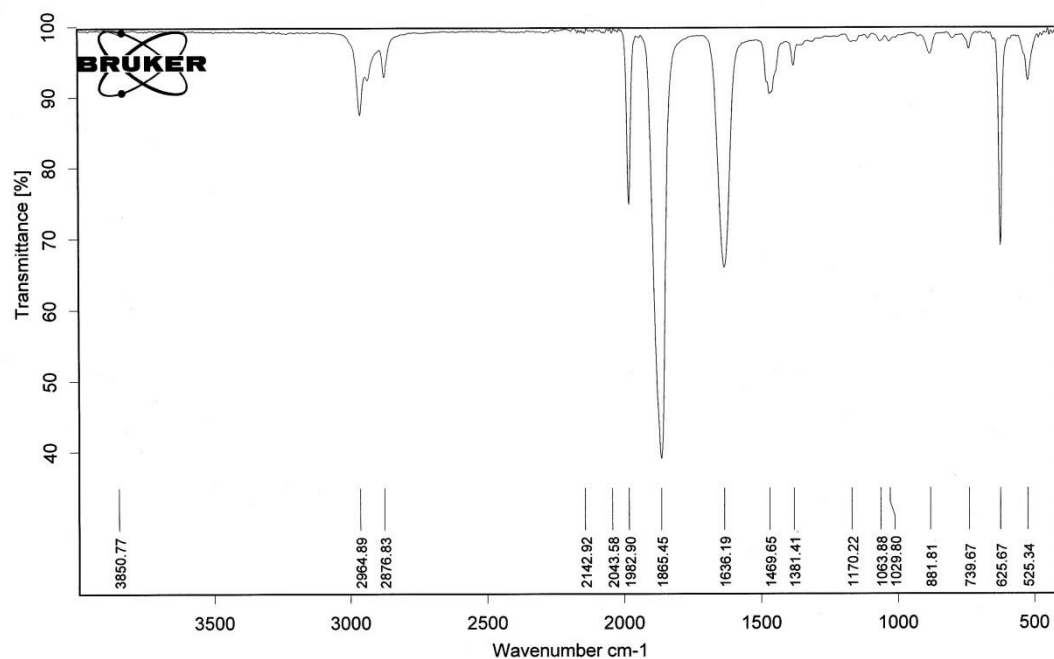

**Figure S2:** TBA[Fe] in CH<sub>3</sub>CN – after 6 h irradiation (180 W, Hg lamp).

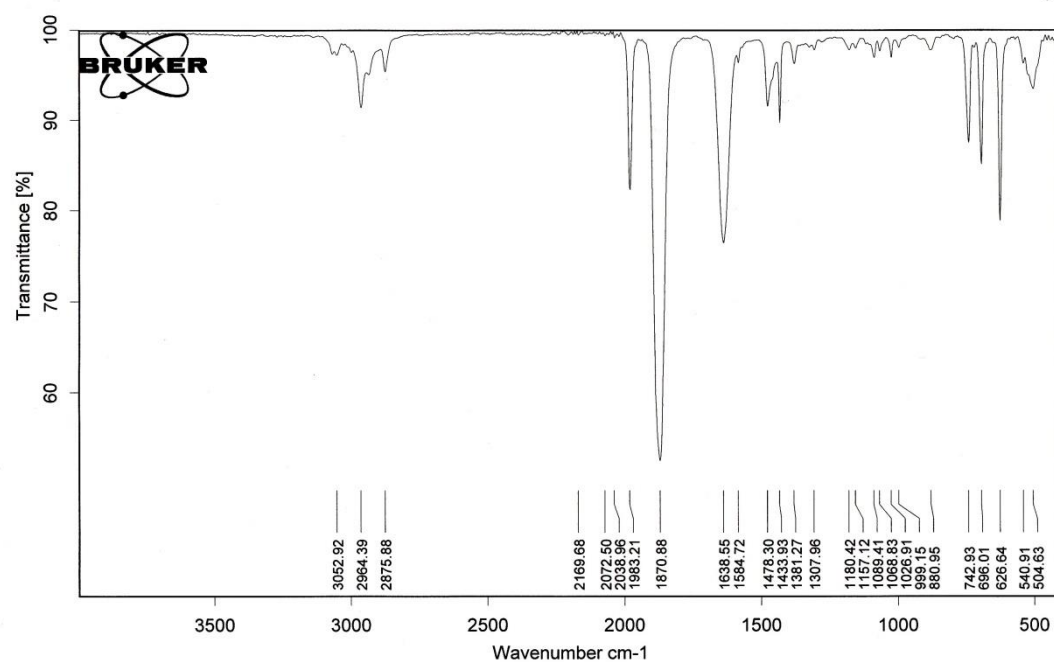

**Figure S3:** TBA[Fe] + PPh<sub>3</sub> (1.5 equiv.) in CH<sub>3</sub>CN - after 4 h irradiation (180 W, Hg lamp).

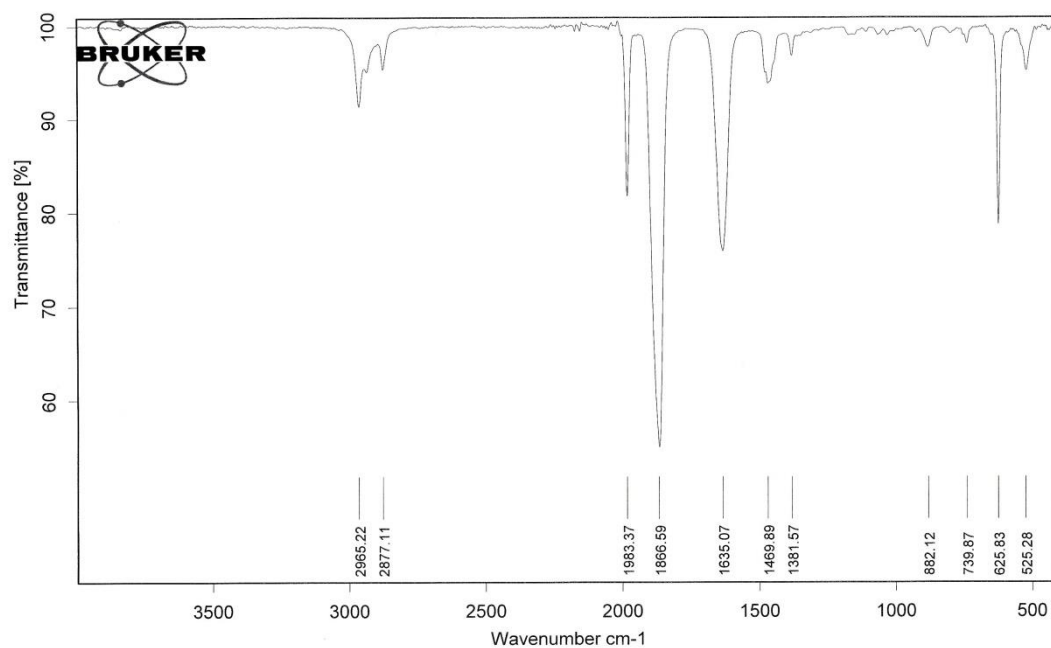

**Figure S4:** TBA[Fe] in DCM - no heating.

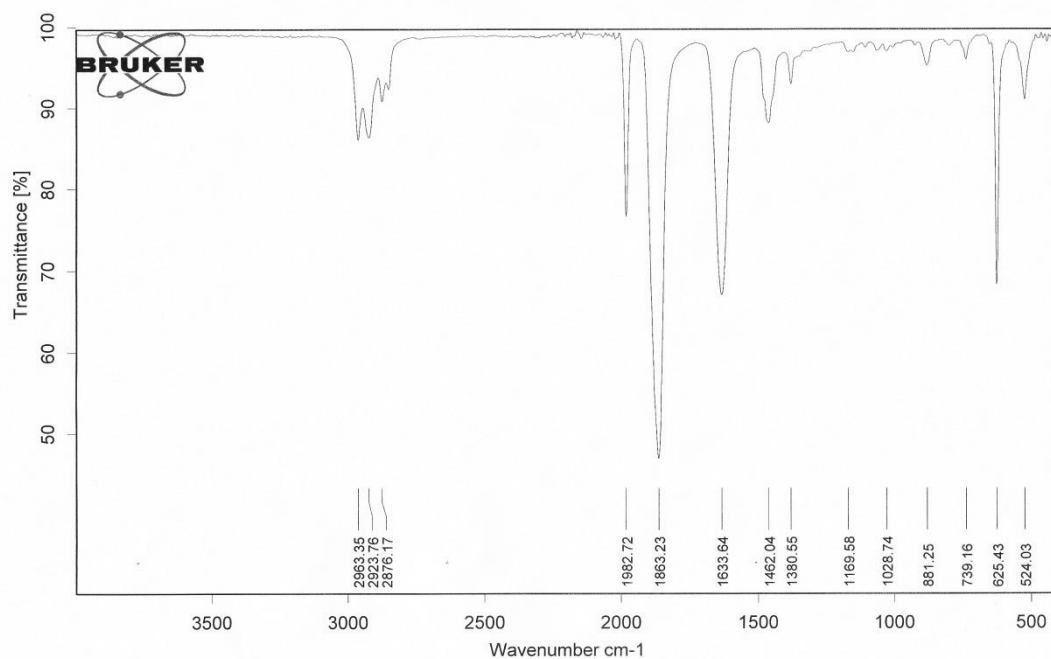

**Figure S5:** TBA[Fe] in DCM – after 6 h at 45 °C.

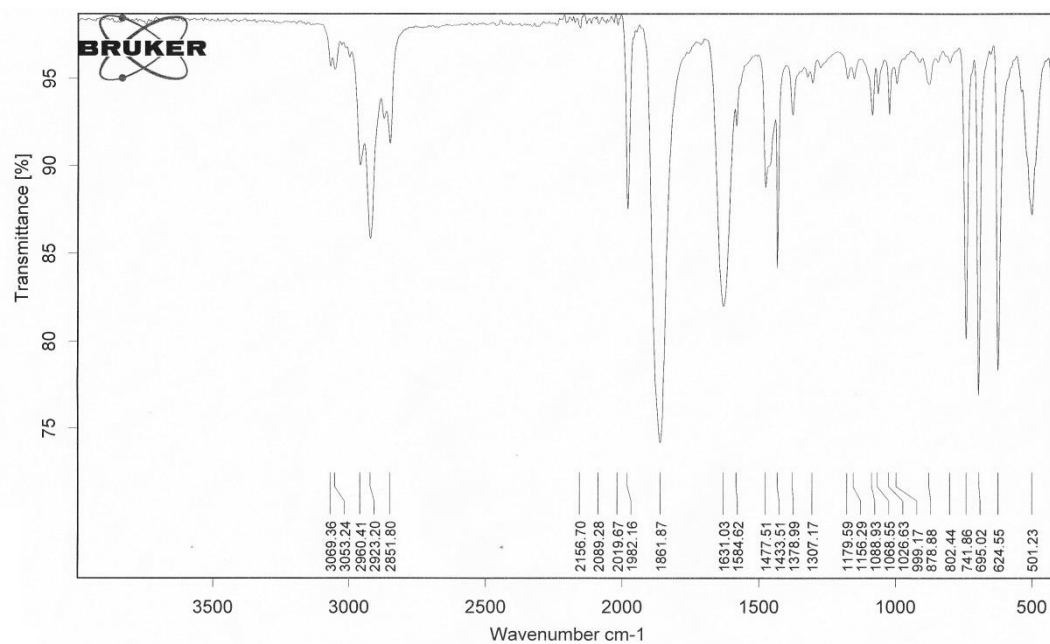

**Figure S6:** TBA[Fe] + PPh<sub>3</sub> (2 equiv.) in DCM - after 4 h at 45 °C.

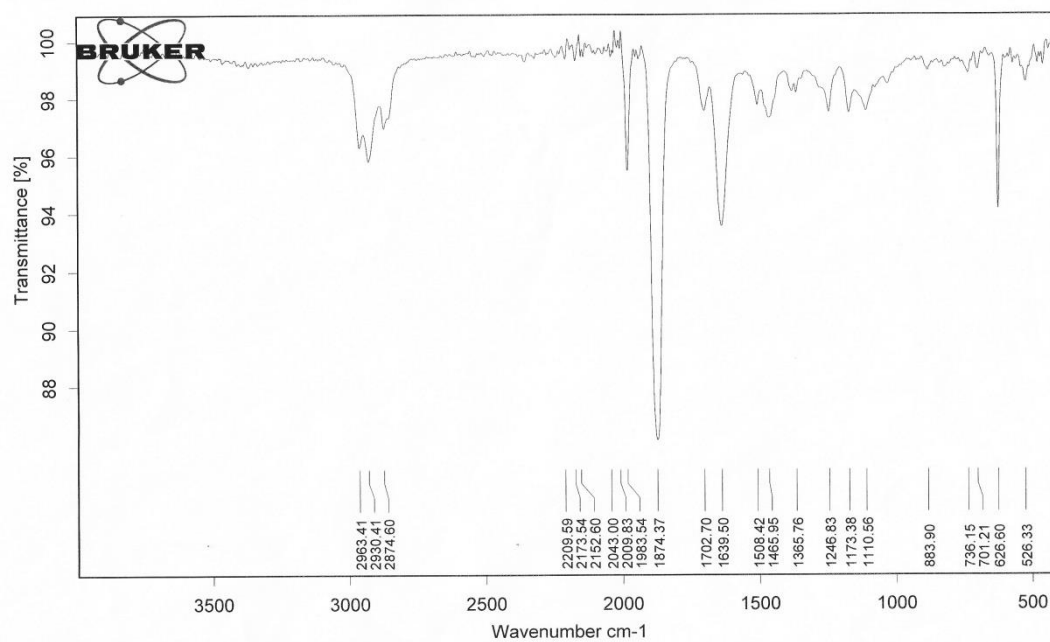

**Figure S7:** TBA[Fe] in Toluene - no MW.

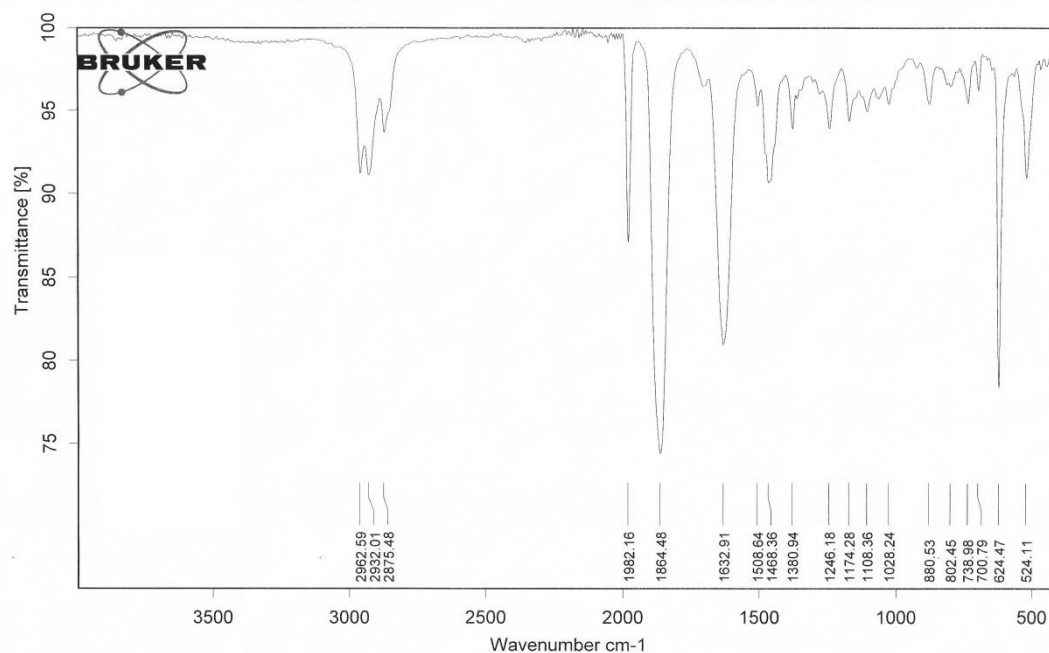

**Figure S8:** TBA[Fe] in Toluene - after 2 h MW at 120 °C.

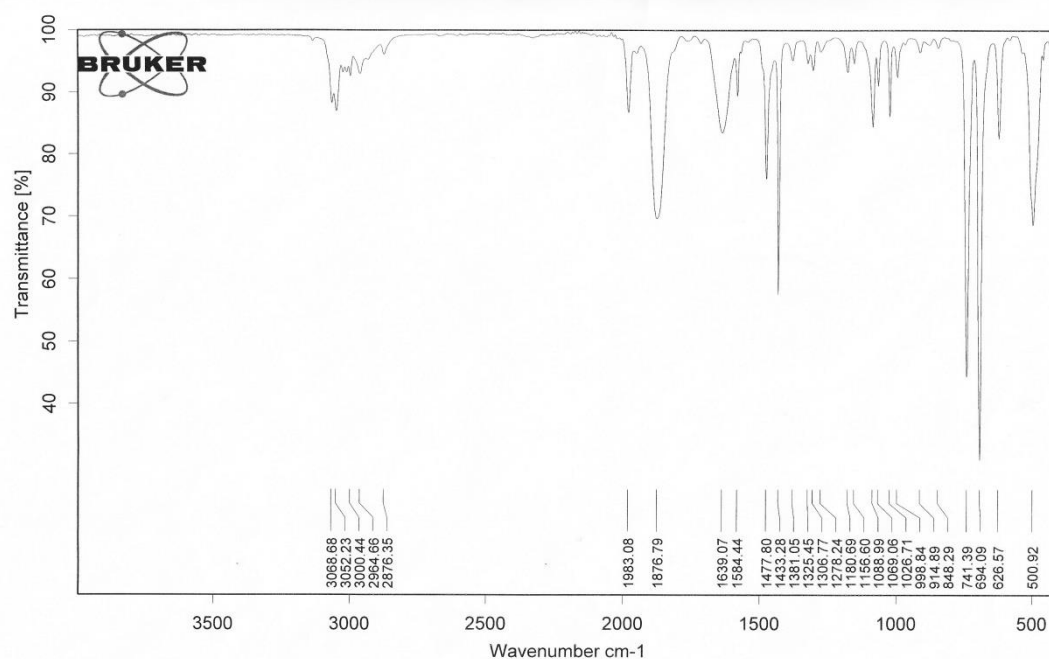

**Figure S9:** TBA[Fe] + PPh<sub>3</sub> (2 equiv.) in Toluene - after 2 h MW at 120 °C.

### **3. UV spectrum of TBA[Fe]**

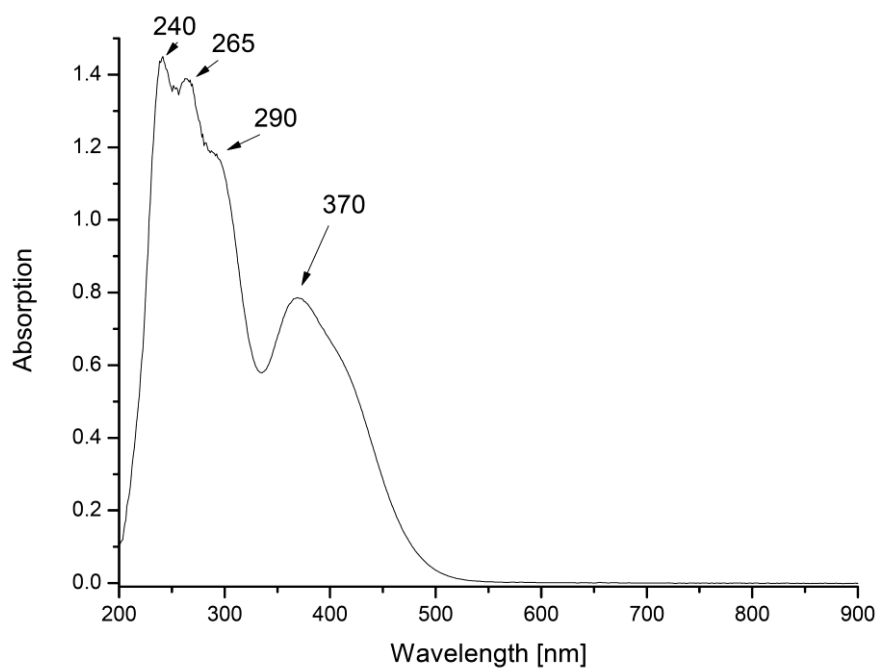

**Figure S10:** UV spectrum of TBA[Fe] in CH<sub>3</sub>CN.

### **4. Fluorescence spectrum of TBA[Fe]**

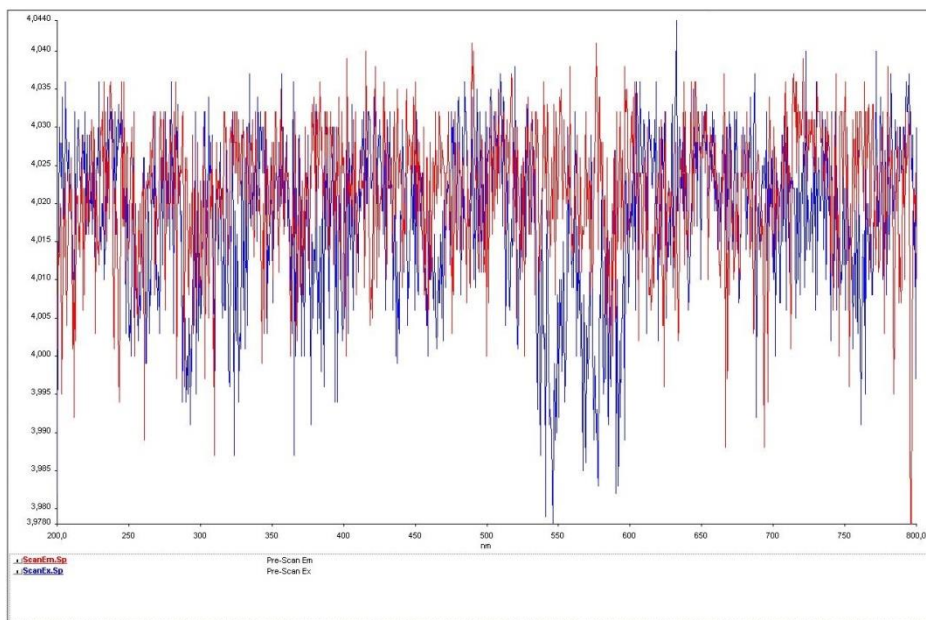

**Figure S11:** Fluorescence spectrum of TBA[Fe] in CH<sub>3</sub>CN. The excitation scan (blue) and emission scan (red).

## 5. Conversion-Time and Temperature-Time Plot for the Rearrangement of VCP 1 (measured by in-situ IR-spectroscopy)

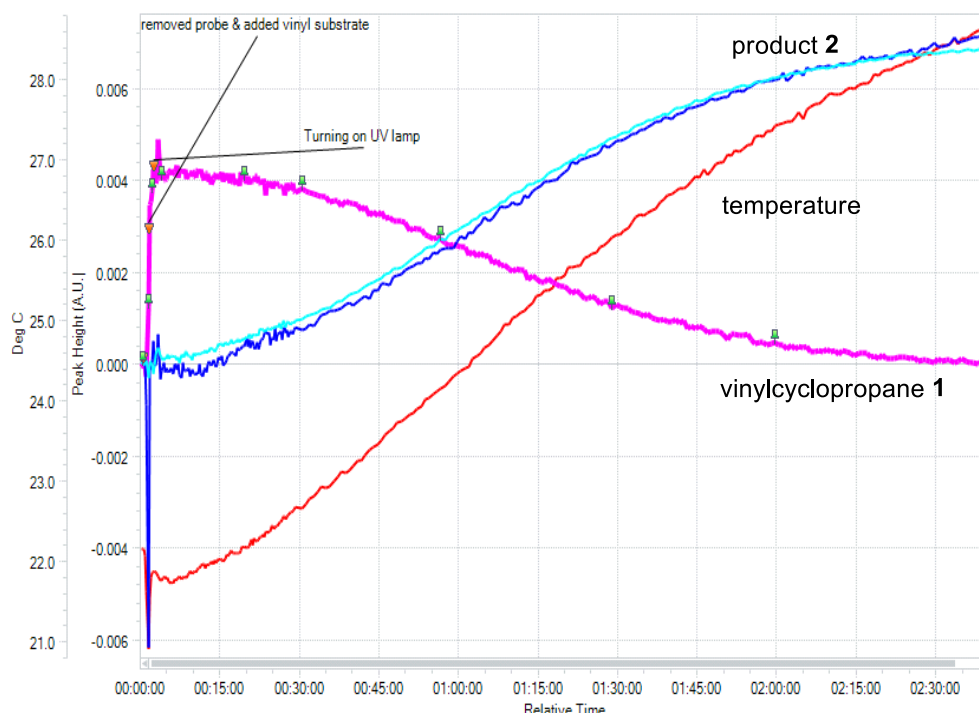

## 6. Preparation of Vinylcyclopanes

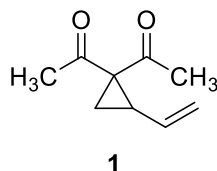

### 1,1'-(2-Vinylcyclopropane-1,1-diyl)diethanone (**1**):<sup>[1]</sup>

(*trans*)-1,4-Dibrombut-2-ene (4.278 g, 20 mmol, 1 equiv.) and K<sub>2</sub>CO<sub>3</sub> (8.154 g, 59 mmol, 2.95 equiv.) were suspended in acetone (35 mL). 2,4-Pentanedione (2.0 mL, 20 mmol, 1.0 equiv.) was added drop wise and the mixture was heated to reflux for 14.75 h. The reaction mixture was cooled to room temperature and Et<sub>2</sub>O (35 mL) was added. The resulting precipitate was removed via filtration and washed with Et<sub>2</sub>O (2 x 25 mL). The solvent was removed under reduced pressure and the residue purified by column chromatography on silica gel eluting with *n*-pentane/Et<sub>2</sub>O 4:1 (v/v) yielding 1.547 g (51%) of the desired product **1** as a colorless oil.

$R_f$  = 0.29 (*n*-pentane/Et<sub>2</sub>O, 4:1 (v/v)); <sup>1</sup>H-NMR (250 MHz, CDCl<sub>3</sub>) δ 5.33-5.28 (m, 2H), 5.17-5.13 (m, 1H), 2.67-2.58 (m, 1H), 2.27 (s, 3H), 2.17 (s, 3H), 1.84 (dd, *J* = 7.1, 5.3 Hz, 1H), 1.49 (dd, *J* = 8.8, 5.1 Hz, 1H) ppm; <sup>13</sup>C-NMR (63 MHz, CDCl<sub>3</sub>) δ 202.7, 202.4, 132.8, 118.9, 51.2, 32.4, 30.9, 26.9, 20.2 ppm; IR (ATR, neat) 3088, 3010, 1684, 1638 cm<sup>-1</sup>; GC/MS (EI, 70 eV) *m/z* (%) 152 (M<sup>+</sup>, 5), 137 (40), 109 (100), 95 (22), 91 (33), 67 (44).



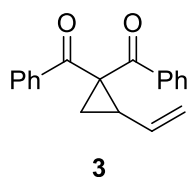

**(2-Vinylcyclopropane-1,1-diyl)bis(phenylmethanone) (3):<sup>[2]</sup>**

1,3-Diphenyl-1,3-propanedione (3.364 g, 15 mmol, 1 equiv.) was dissolved in anhydrous THF (20 mL) under an atmosphere of dry nitrogen. NaH (1.200 g, 60% in mineral oil, 30 mmol) was added as a solid and the suspension stirred for 15 min at room temperature. (*trans*)-1,4-Dibrombut-2-ene (3.158 g, 15 mmol, 1 equiv.) was added and the reaction mixture stirred for 66 h at room temperature. The resulting suspension was diluted with Et<sub>2</sub>O and the precipitate removed via filtration and washed with Et<sub>2</sub>O. A saturated solution of NH<sub>4</sub>Cl (100 mL) was added. The mixture was extracted with Et<sub>2</sub>O (2 x 150 mL) and EtOAc (100 mL). The combined organic phases were dried over MgSO<sub>4</sub> and the solvent was removed under reduced pressure. The residue was purified via column chromatography on silica gel eluting with petrol ether/EtOAc 20:1 to 10:1 (v/v) to yield a mixture of product and unreacted starting materials. Pure product was obtained via additional purification using HPLC eluting with petrol ether/EtOAc 20:1 giving 758 mg (18%) of **3** as a colorless solid.

*R<sub>f</sub>* = 0.33 (petrol ether/EtOAc, 20:1(v/v)); <sup>1</sup>H-NMR (300 MHz, CDCl<sub>3</sub>) δ 7.72-7.64 (m, 4H), 7.39-7.32 (m, 2H), 7.26-7.21 (m, 4H), 5.42-5.38 (m, 2H), 3.37-3.29 (m, 1H), 2.34 (dd, *J* = 4.4, 7.2 Hz, 1H), 1.58 (dd, *J* = 4.4, 8.6 Hz, 1H) ppm; <sup>13</sup>C-NMR (63 MHz, CDCl<sub>3</sub>) 196.7, 196.0, 138.1, 137.7, 133.0, 132.9, 132.85, 128.6, 128.43, 128.4, 118.7, 47.7, 31.2, 21.3 ppm; IR (ATR, neat) 3061, 2986, 1680, 1660, 1633, 1594, 1575, 1446 cm<sup>-1</sup>; HRMS (ESI) calc. for [C<sub>19</sub>H<sub>16</sub>O<sub>2</sub> + Na<sup>+</sup>]: 299.1043, found 299.1036.

(**R**)-**3**: [α]<sub>D</sub><sup>20</sup>: +305.6 (c = 5.33, CHCl<sub>3</sub>); (**S**)-**3**: [α]<sub>D</sub><sup>20</sup>: -305.6 (c = 5.33, CHCl<sub>3</sub>).

Data File C:\HPCHEM\1\DATA\DP\DP65H200.D

Sample Name: DP65h2

Chiralcel OD-H; Heptan/Isopropanol 95:5, 0.5 mL/min; 3µl

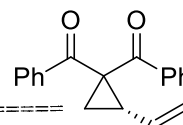

Injection Date : 27.05.15 14:26:59

Sample Name : DP65h2

Vial : 12

(R)-3

Acq. Operator : Dominik

Inj Volume : 3 µl

Method : C:\HPCHEM\1\METHODS\BPOD9 1.M

Last changed : 22.05.15 15:55:29 by Dominik

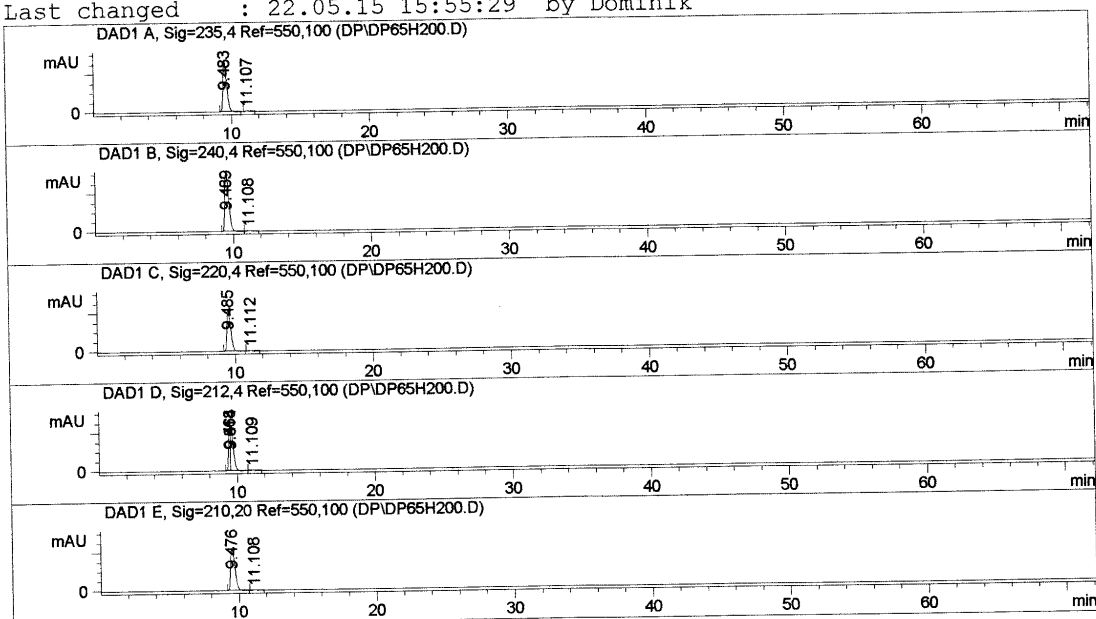

### Area Percent Report

Sorted By : Signal  
Multiplier : 1.0000  
Dilution : 1.0000

Signal 1: DAD1 A, Sig=235,4 Ref=550,100

| Peak # | RetTime [min] | Type | Width [min] | Area [mAU*s] | Height [mAU] | Area %  |
|--------|---------------|------|-------------|--------------|--------------|---------|
| 1      | 9.483         | PB   | 0.2796      | 4.96877e4    | 2640.18140   | 99.4388 |
| 2      | 11.107        | BP   | 0.2726      | 280.42484    | 14.31167     | 0.5612  |

Totals : 4.99682e4 2654.49306

Results obtained with enhanced integrator!

Instrument 1 15.06.15 10:08:23 Dominik

Page 1 of 2

Data File C:\HPCHEM\1\DATA\DP\DP65H300.D

Sample Name: DP65H3

Chiralcel OD-H; Heptan/Isopropanol 95:5, 0.5 mL/min; 3µl

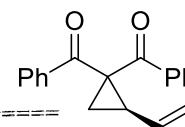

(S)-3

Injection Date : 20.05.15 15:59:54

Vial : 12

Sample Name : DP65H3

Acq. Operator : Dominik

Inj Volume : 3 µl

Acq. Method : C:\HPCHEM\1\METHODS\BPOD9 1.M

Last changed : 20.05.15 15:58:17 by Isabel  
(modified after loading)

Analysis Method : C:\HPCHEM\1\METHODS\BPOD9 1.M

Last changed : 22.05.15 15:55:29 by Dominik

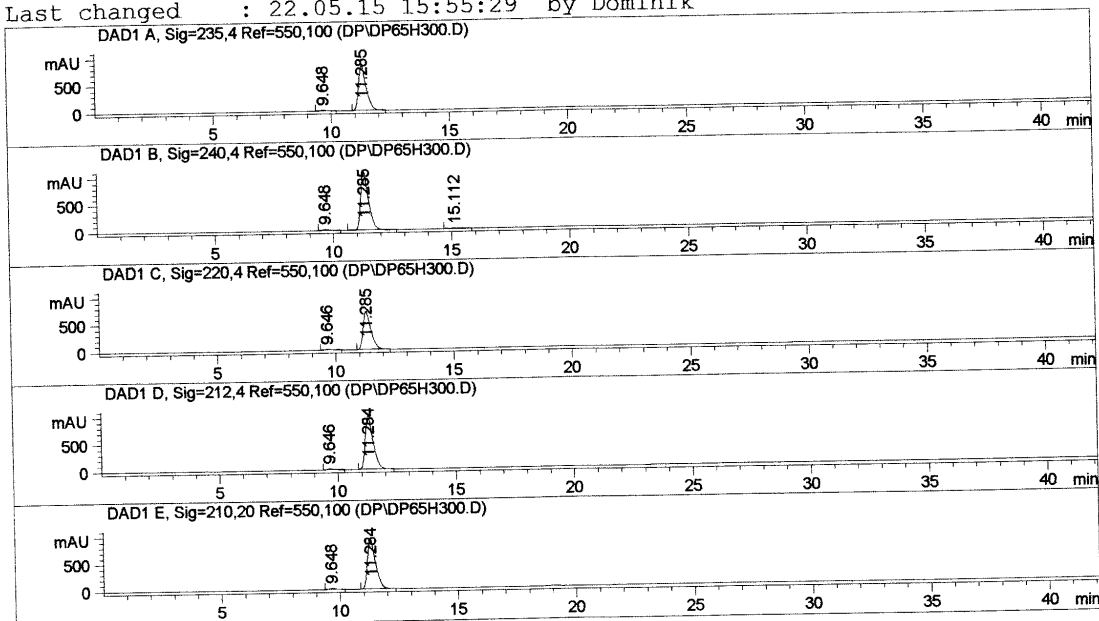

# Area Percent Report

Sorted By : Signal  
Multiplier : 1.0000  
Dilution : 1.0000

Signal 1: DAD1 A, Sig=235,4 Ref=550,100

| Peak # | RetTime [min] | Type | Width [min] | Area [mAU*s] | Height [mAU] | Area %  |
|--------|---------------|------|-------------|--------------|--------------|---------|
| 1      | 9.648         | PB   | 0.2836      | 319.26849    | 16.65573     | 1.6750  |
| 2      | 11.285        | BB   | 0.3328      | 1.87413e4    | 825.64966    | 98.3250 |

Totals : 1.90606e4 842.30539

Results obtained with enhanced integrator!

Instrument 1 26.05.15 10:57:42 Dominik

Page 1 of 2

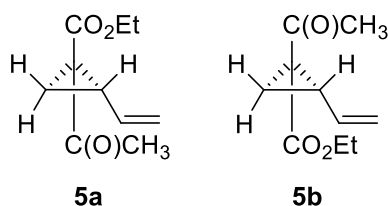

**(anti) and (syn) Ethyl 1-acetyl-2-vinylcyclopropanecarboxylate (5a and 5b):<sup>[1]</sup>**

(*trans*)-1,4-Dibrombut-2-ene (1.390 g, 6.5 mmol) and K<sub>2</sub>CO<sub>3</sub> (2.695 g, 19.5 mmol) were added to a dried flask under an atmosphere of dry nitrogen. Anhydrous ethanol (14 mL) was added followed by the drop wise addition of ethyl acetoacetate (0.8 mL, 6.5 mmol). The reaction mixture was heated to reflux for 15 h then cooled to room temperature and diluted with Et<sub>2</sub>O (15 mL). The precipitate was removed via filtration and washed with Et<sub>2</sub>O (2 x 10 mL). The solvent was removed under reduced pressure. The reaction gave rise to three major products: Diastereoisomer **5a** and **5b** alongside some dihydrofuran **6**. Diastereoisomer **5b** could be separated by regular column chromatography on silica gel eluting with petrol ether/EtOAc 20:1 (v/v) to give 0.457 g (39%) as a colorless oil. Diastereoisomer **5a** was purified via HPLC eluting again with petrol ether/EtOAc 20:1 (v/v) giving 0.231 g (20%) as a colorless oil. The yield of dihydrofuran **6** was not determined.

**5a:**

*R<sub>f</sub>* = 0.29 (petrol ether/EtOAc, 20:1 (v/v)); <sup>1</sup>H-NMR (250 MHz, CDCl<sub>3</sub>) δ 5.35-5.26 (m, 2H), 5.15-5.11 (m, 1H), 4.33- 4.13 (m, 2H), 2.67-2.57 (m, 1H), 2.33 (s, 3H), 1.85 (dd, *J* = 7.5, 4.6 Hz, 1H), 1.53 (dd, *J* = 8.8, 4.6 Hz, 1H), 1.30 (t, *J* = 7.2 Hz, 3H) ppm; <sup>13</sup>C-NMR (63 MHz, CDCl<sub>3</sub>) δ 201.1, 170.4, 132.8, 118.9, 61.5, 42.7, 33.5, 30.5, 20.1, 14.1 ppm; IR (ATR, neat) 3088, 2984, 2929, 1702, 1637 cm<sup>-1</sup>; GC/MS (EI, 70 eV) *m/z* (%) 182 (M<sup>+</sup>, found), 139 (54), 136 (45), 135 (48), 121 (100), 94 (65), 93 (56), 67 (55), 66 (98), 65 (43).

**5b:**

*R<sub>f</sub>* = 0.23 (petrol ether/EtOAc, 20:1 (v/v)); <sup>1</sup>H-NMR (250 MHz, CDCl<sub>3</sub>) δ 5.58-5.44 (m, 1H), 5.29 (dd, *J* = 17.0, 1.6 Hz, 1H), 5.14 (dd, *J* = 10.1, 1.6 Hz, 1H), 4.24 (q, *J* = 7.1 Hz, 2H), 2.61 (ddd, *J* = 8.4, 8.4, 8.4 Hz, 1H), 2.40 (s, 3H), 1.76 (dd, *J* = 7.7, 4.4 Hz, 1H), 1.58 (dd, *J* = 8.9, 4.4 Hz, 1H), 1.30 (t, *J* = 7.1 Hz, 3H) ppm; <sup>13</sup>C-NMR (63 MHz, CDCl<sub>3</sub>) δ 202.0, 168.8, 133.1, 118.8, 61.4, 43.2, 34.3, 29.5, 23.1, 14.2 ppm; IR (ATR, neat) ν 3088 , 2984 , 2938 , 1724 , 1695 , 1638 cm<sup>-1</sup>; GC/MS (EI, 70 eV) *m/z* (%) 182 (M<sup>+</sup>, found), 139 (61), 136 (43), 135 (50), 121 (100), 94 (64), 93 (56), 67 (54), 66 (97), 65 (44).

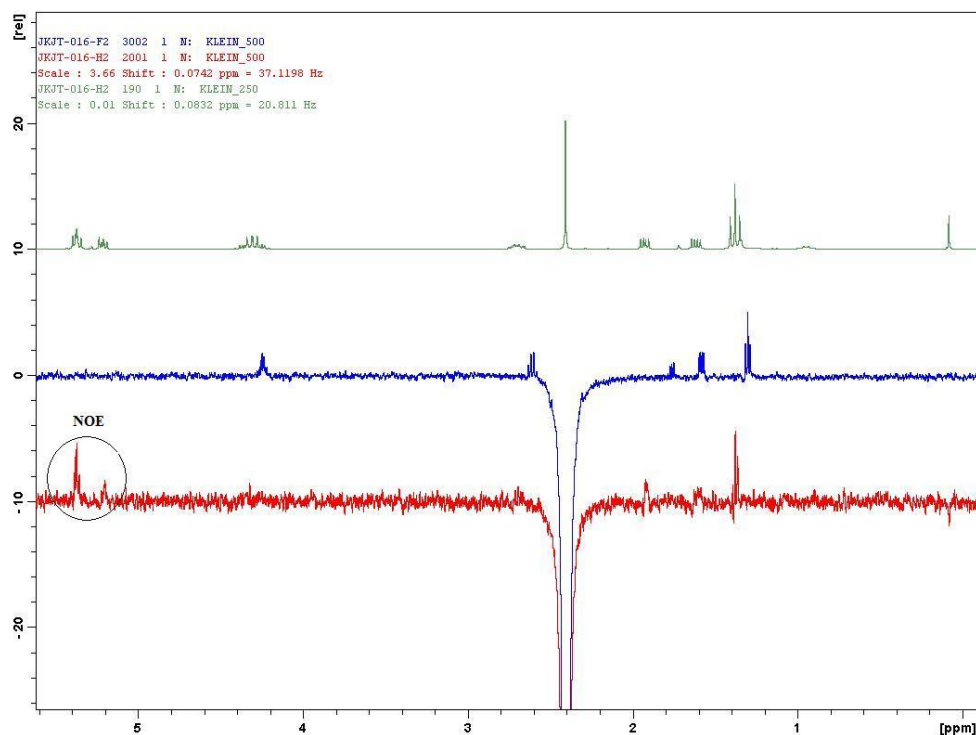

**Figure S12:** NOE-Spectra of **5a** (red), **5b** (blue) and the  $^1\text{H}$ -spectrum of **5a** (green).

(anti) and (syn) *tert*-Butyl 1-acetyl-2-vinylcyclopropane-1-carboxylate (**7a** and **7b**):<sup>[1]</sup>

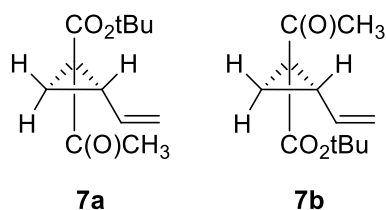

NaH (0.800 g, 60% in mineral oil, 20 mmol) was suspended in anhydrous THF (16 mL) under an atmosphere of dry nitrogen. The reaction mixture was cooled to 0 °C (cryostat). *tert*-Butyl acetoacetate (1.6 mL, 9.51 mmol) was added drop wise and the reaction mixture stirred at 0 °C for 1 h. (*trans*)-1,4-Dibrombut-2-ene (2.034 g, 9.51 mmol) was added drop wise as a solution in anhydrous THF (6 mL). Upon completion of the addition the cooling bath was removed and the reaction mixture stirred for 40 h. The resulting suspension was diluted with Et<sub>2</sub>O (20 mL) and the precipitate removed via filtration and washed with Et<sub>2</sub>O (2 x 10 mL). The solvent was removed under reduced pressure. Diastereoisomer **7a** and **7b** alongside some dihydrofurane **8**. Diastereoisomer **7b** could be isolated via regular column chromatography on silica gel elution with petrol ether/EtOAc 20:1 (v/v) giving 0.267 g (13%) as a colorless oil. Diastereoisomer **7a** was isolated via HPLC eluting with petrol ether/EtOAc 20:1 (v/v) yielding 0.409 g (21%) as a colorless oil. The yield of dihydrofurane **8** was not determined.

**7a:**

$R_f$  = 0.37 (petrol ether/EtOAc, 20:1 (v/v)),  $^1\text{H}$ -NMR (250 MHz, CDCl<sub>3</sub>)  $\delta$  5.30-5.25 (m, 2H), 5.14-5.09 (m, 1H), 2.59-2.49 (m, 1H), 2.29 (s, 3H), 1.76 (dd,  $J$  = 7.5, 4.5 Hz, 1H), 1.49 (s, 9H), 1.45 (dd,  $J$

= 8.8, 4.6 Hz, 1H) ppm;  $^{13}\text{C-NMR}$  (63 MHz,  $\text{CDCl}_3$ )  $\delta$  201.4, 169.4, 133.1, 118.6, 82.3, 43.7, 32.8, 30.4, 28.0, 19.8 ppm; **IR** (ATR, neat) 2978, 2932, 1701, 1637  $\text{cm}^{-1}$ ; **GC/MS** (EI, 70 eV)  $m/z$  (%) 210 ( $\text{M}^+$ , found), 154 (50), 135 (32), 121 (58), 111 (45), 94 (60), 66 (37), 57 (100).

#### 7b:

$R_f$  = 0.29 (petrol ether/EtOAc, 20:1 (v/v));  $^1\text{H-NMR}$  (250 MHz,  $\text{CDCl}_3$ )  $\delta$  5.59-5.45 (m, 1H), 5.29 (dd,  $J$  = 17.2, 1.6 Hz, 1H), 5.14 (dd,  $J$  = 10.1, 1.6 Hz, 1H), 2.58 (ddd,  $J$  = 8.3, 8.3, 8.3 Hz, 1H), 2.40 (s, 3H), 1.69-1.62 (m, 1H), 1.51-1.46 (m, 1H), 1.49 (s, 9H) ppm;  $^{13}\text{C-NMR}$  (63 MHz,  $\text{CDCl}_3$ )  $\delta$  202.4, 167.8, 133.3, 118.4, 82.2, 44.2, 33.6, 29.5, 28.1, 22.9 ppm; **IR** (ATR, neat) 3087, 2978, 2934, 1719, 1696, 1638  $\text{cm}^{-1}$ ; **GC/MS** (EI, 70 eV)  $m/z$  (%) 210 ( $\text{M}^+$ , found), 154 (47), 135 (32), 121 (57), 111 (48), 94 (57), 93 (29), 66 (37), 57 (100).

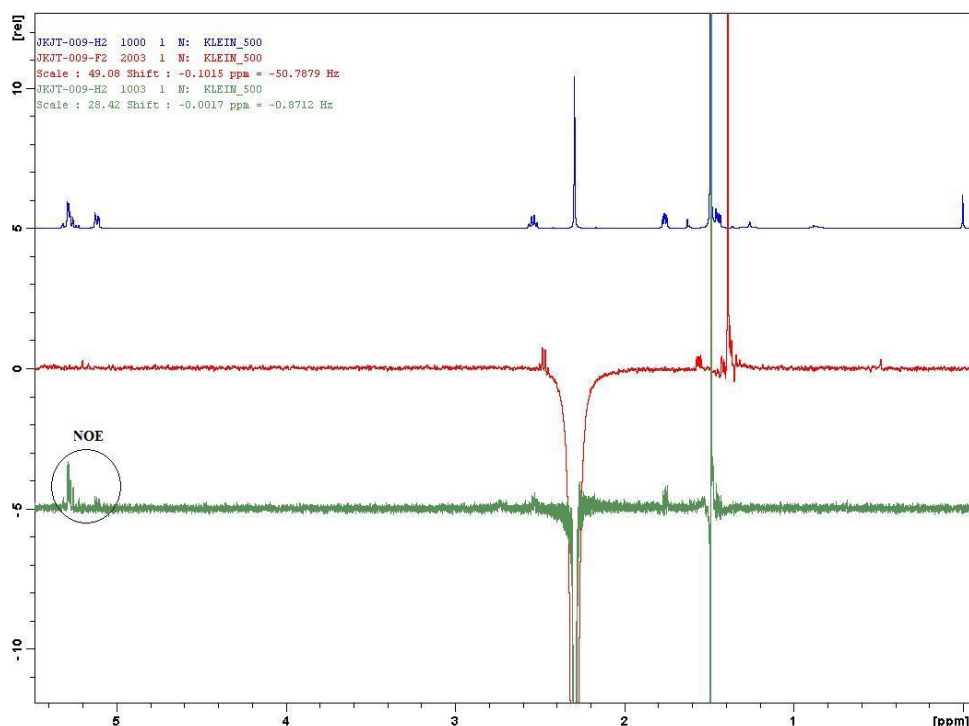

**Figure S13:** NOE-Spectra of **7a** (green), **7b** (red) and the  $^1\text{H}$ -spectrum of **7a** (blue).

#### (anti) and (syn) Ethyl 1-benzoyl-2-vinylcyclopropane-1-carboxylate (**9a** and **9b**):<sup>[3]</sup>

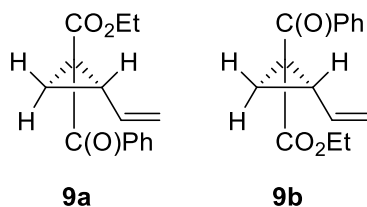

Ethyl benzoylacetate (2.883 g, 15 mmol, 1 equiv.) was dissolved in anhydrous EtOH (20 mL) under an atmosphere of dry nitrogen.  $\text{K}_2\text{CO}_3$  (4.146 g, 30 mmol, 2 equiv.) was added and the suspension stirred at room temperature for 15 min. Additional anhydrous EtOH (10 mL) was added prior to the addition of (*trans*)-1,4-dibrombut-2-ene (3.158 g, 15 mmol, 1 equiv.). The reaction mixture was stirred for 95 h

at room temperature. The reaction mixture was diluted with Et<sub>2</sub>O and the precipitate removed via filtration and washed with additional Et<sub>2</sub>O. The solvent was removed under reduced pressure. The residue was portioned between H<sub>2</sub>O (30 mL) and Et<sub>2</sub>O (40 mL). The Aqueous layer was extracted with Et<sub>2</sub>O (3 x 40 mL). The combined organic extracts were dried over MgSO<sub>4</sub> and the solvent was removed under reduced pressure. The residue was purified via column chromatography on silica gel eluting with *n*-pentane/Et<sub>2</sub>O 20:1 (v/v) followed by HPLC eluting with petrol ether/EtOAc 20:1 (v/v) giving 1.374 g (37%) of diastereoisomer **9b** as a colorless oil and 936 mg (26%) of diastereoisomer **9a** as a colorless oil. The assignment of the diastereoisomers is based on the assignment of the ethyl and *tert*-butyl esters above.

**9a:**

$R_f$  = 0.33 (*n*-pentane/Et<sub>2</sub>O, 20:1 (v/v)); **<sup>1</sup>H-NMR** (300 MHz, CDCl<sub>3</sub>)  $\delta$  7.84-7.80 (m, 2H), 7.55-7.750 (m, 1H), 7.45-7.40 (m, 1H), 5.33 (dd, *J* = 2.0, 16.9 Hz, 1H), 5.25-5.13 (m, 1H), 5.01 (dd, *J* = 2.0, 10.0 Hz, 1H), 4.14-3.90 (m, 2H), 2.96-2.88 (m, 1H), 1.95 (dd, *J* = 4.6, 7.4 Hz, 1H), 1.62 (dd, *J* = 4.6, 8.7 Hz, 1H), 0.92 (t, *J* = 7.2 Hz, 3H) ppm; **<sup>13</sup>C-NMR** (75 MHz, CDCl<sub>3</sub>)  $\delta$  193.7, 171.0, 137.7, 133.2, 132.8, 128.5, 128.4, 118.6, 61.5, 39.8, 32.9, 19.6, 13.6 ppm; **IR** (ATR, neat) 2982, 1722, 1677, 1638, 1598, 1580, 1449 cm<sup>-1</sup>; **HRMS** (ESI) calc. for [C<sub>15</sub>H<sub>16</sub>O<sub>3</sub> + Na<sup>+</sup>]: 267.0992, found 267.0977.

**9b:**

$R_f$  = 0.33 (*n*-pentane/Et<sub>2</sub>O, 20:1 (v/v)); **<sup>1</sup>H-NMR** (300 MHz, CDCl<sub>3</sub>)  $\delta$  7.88-7.85 (m, 2H), 7.57-7.52 (m, 1H), 7.46-7.41 (m, 2H), 5.83-5.71 (m, 1H), 5.43-5.37 (m, 1H), 5.23-5.19 (m, 1H), 4.00 (q, *J* = 7.4 Hz, 2H), 2.79-2.71 (m, 1H), 1.94 (dd, *J* = 4.8, 7.7 Hz, 1H), 1.66 (dd, 4.8, 9.0 Hz, 1H), 0.90 (t, *J* = 7.1 Hz, 3H) ppm; **<sup>13</sup>C-NMR** (75 MHz, CDCl<sub>3</sub>)  $\delta$  194.5, 169.3, 137.3, 133.1, 132.8, 128.5, 128.2, 118.8, 61.3, 40.6, 30.4, 21.6, 13.7 ppm; **IR** (ATR, neat) 3086, 2982, 1727, 1678, 1637, 1598, 1581, 1448 cm<sup>-1</sup>; **HRMS** (ESI) calc. for [C<sub>15</sub>H<sub>16</sub>O<sub>3</sub> + Na<sup>+</sup>]: 267.0992, found 267.0980.

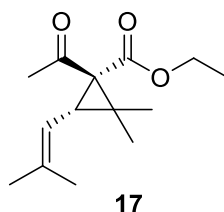

**Ethyl 1-acetyl-2,2-dimethyl-3-(2-methylprop-1-en-1-yl)cyclopropane-1-carboxylate (17):**

A solution of diisopropylamine (1.55 mL, 11 mmol, 1.1 equiv.) in THF (20 mL) was cooled to -78 °C and 1.6 M *n*-BuLi (6.87 mL, 11 mmol, 1.1 equiv.) was added dropwise. The reaction mixture was warmed to room temperature for 15 min, then re-cool to -78 °C. Ethyl chrysanthemate (2.17 mL, 10 mmol, 1 equiv.) was added dropwise in to the reaction mixture and stirred for 30 min at -78 °C then 1 h at room temperature. The reaction mixture was re-cooled to -78 °C again and acetyl chloride (0.71 mL, 10 mmol, 1 equiv.) was added dropwise. The reaction was allowed to warm to room temperature and stirred overnight. The reaction was quenched by sat. NH<sub>4</sub>Cl, diluted with water, and extract with three time of diethyl ether. The combined organic layers were dried over MgSO<sub>4</sub>, filtered and then concentrated under reduced pressure. The residue was purified by column chromatography on silica gel eluting with *n*-pentane/EA 40:1 (v/v) to afford 1.3345 g (56%) of **17** as a colorless oil.

$R_f = 0.37$  (*n*-pentane /EA, 40:1 (v/v));  **$^1\text{H-NMR}$**  (300 MHz,  $\text{CDCl}_3$ )  $\delta$  5.03-5.00 (m, 1H), 4.19 (q,  $J = 7.1$  Hz, 2H), 2.58 (d,  $J = 8.0$  Hz, 1H), 2.27 (s, 3H), 1.73 (s, 3H), 1.71 (s, 3H), 1.33 (s, 3H), 1.26 (t,  $J = 7.1$  Hz, 3H), 1.11 (s, 3H) ppm;  **$^{13}\text{C-NMR}$**  (75 MHz,  $\text{CDCl}_3$ )  $\delta$  201.3, 168.6, 137.1, 117.1, 60.8, 51.2, 34.8, 33.4, 30.2, 25.7, 22.0, 18.7, 18.0, 14.1 ppm; **IR** (ATR) 2980, 2929, 1733, 1700, 1446, 1377, 1355, 1304, 1274, 1178, 1095, 852  $\text{cm}^{-1}$ ; **HRMS** (ESI) calc. for  $[\text{C}_{14}\text{H}_{22}\text{O}_3 + \text{Na}^+]$ : 261.1461, found: 261.1452.

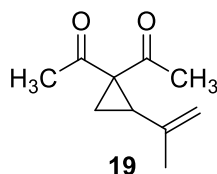

**1,1'-(2-(Prop-1-en-2-yl)cyclopropane-1,1-diyl)bis(ethan-1-one) (19):** <sup>[1]</sup>

1,4-Dibromo-2-methylbut-2-ene (1,59 g, 7 mmol, 1 equiv.) and  $\text{K}_2\text{CO}_3$  (2,90 g, 21 mmol, 3 equiv.) were suspended in acetone (20 mL). 2,4-Pentanedione (0,7 mL, 7 mmol, 1.0 equiv.) was added drop wise and the mixture was heated to reflux for 18 h. The reaction mixture was cooled to room temperature and  $\text{Et}_2\text{O}$  (35 mL) was added. The resulting precipitate was removed via filtration and washed with  $\text{Et}_2\text{O}$  (2 x 25 mL). The solvent was removed under reduced pressure and the residue purified by column chromatography on silica gel eluting with *n*-pentane/ $\text{Et}_2\text{O}$  4:1 (v/v) yielding 378 mg (32%) of the desired product **19** as a yellow oil.

$R_f = 0.38$  (*n*-pentane/ $\text{Et}_2\text{O}$ , 4:1 (v/v));  **$^1\text{H-NMR}$**  (250 MHz,  $\text{CDCl}_3$ )  $\delta$  4.94 (d,  $J = 0.8$  Hz, 1H), 4.75 (s, 1H), 2.57 (t,  $J = 8.4$  Hz, 1H), 2.23 (d,  $J = 1.2$  Hz, 3H), 2.20 (d,  $J = 1.2$  Hz, 3H), 1.94 (ddd,  $J = 8.0, 5.1, 1.0$  Hz, 1H), 1.76 (d,  $J = 0.5$  Hz, 3H), 1.50 – 1.41 (m, 1H) ppm;  **$^{13}\text{C-NMR}$**  (63 MHz,  $\text{CDCl}_3$ )  $\delta$  203.2, 202.5, 138.6, 113.9, 51.2, 35.9, 30.7, 27.8, 23.0, 19.2 ppm; **IR** (ATR) 2973, 2918, 1688, 1423, 1357, 1309, 1256  $\text{cm}^{-1}$ ; **GC/MS** (EI, 70 eV)  $m/z$  (%) 166 ( $\text{M}^+$ , found), 151 (14), 123 (67), 43 (100); **HRMS** (EI) calc. for  $[\text{C}_{10}\text{H}_{14}\text{O}_2]$ : 166.0994, found: 166.0991.

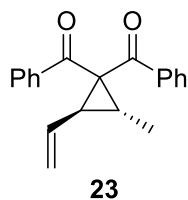

**(2-Methyl-3-vinylcyclopropane-1,1-diyl)bis(phenylmethanone) (23):** <sup>[1]</sup>

The *title compound* was synthesized according to literature<sup>[1]</sup> and was purified via column chromatography on silica gel eluting with PE/EA 40:1 (v/v) to afford **23** as a white solid.

$R_f = 0.34$  (PE/EA 40:1 (v/v)); **mp** 108-111°C;  **$^1\text{H-NMR}$**  (300 MHz,  $\text{CDCl}_3$ )  $\delta$  7.73-7.66 (m, 1H), 7.66-7.59 (m, 1H), 7.42-7.30 (m, 2H), 7.30-7.18 (m, 4H) 5.42-5.32 (m, 2H), 5.06-4.98 (m, 1H) 3.12-3.03 (m, 1H) 2.84-2.73 (m, 1H), 1.12 (d,  $J = 6.4$  Hz, 3H) ppm;  **$^{13}\text{C-NMR}$**  (75 MHz,  $\text{CDCl}_3$ )  $\delta$  196.5, 196.1,



138.6, 138.5, 133.3, 132.9, 132.8, 128.55, 128.53, 128.49, 128.42, 118.1, 53.6, 37.4, 27.3, 11.9 ppm; IR (ATR) 3062, 3027, 1720, 1656, 1490, 1346, 1310, 1125, 848, 761  $\text{cm}^{-1}$ .

### **General Procedure I: Preparation of Olefin-Substituted VCPs<sup>[1]</sup>**

The appropriate vinylcyclopropane (1 equiv.) and 2<sup>nd</sup> generation Grubbs catalyst (0.015 equiv.) was weighed into a dried Schlenk tube under an atmosphere of dry nitrogen.  $\text{CH}_2\text{Cl}_2$  (0.6 M) was added followed by the appropriate alkene (10 equiv.). The Schlenk tube was sealed under an atmosphere of dry nitrogen and the mixture stirred at 45 °C for 16 h. The solvent was removed under reduced pressure and the residue subjected to column chromatography on silica gel.

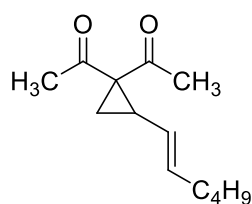

**11**

#### **(E)-1,1'-(2-(Hex-1-en-1-yl)cyclopropane-1,1-diyl)diethanone (11):**

The reaction was carried out on a 5 mmol scale based on vinylcyclopropane **1**. The *title compound* was purified via column chromatography on silica gel eluting with *n*-pentane/ $\text{Et}_2\text{O}$  4:1 (v/v) to afford 511 mg (49%) of **11** as a tan oil.

$R_f$  = 0.39 (*n*-pentane/ $\text{Et}_2\text{O}$ , 4:1 (v/v));  $^1\text{H}$  NMR (300 MHz,  $\text{CDCl}_3$ )  $\delta$  5.80 – 5.66 (m, 1H), 4.93 (dd,  $J$  = 15.3, 8.5 Hz, 1H), 2.57 (q,  $J$  = 8.3 Hz, 1H), 2.26 (s, 3H), 2.15 (s, 3H), 1.98 (m, 2H), 1.80 (dd,  $J$  = 7.4, 5.1 Hz, 1H), 1.47 (dd,  $J$  = 8.8, 5.1 Hz, 1H), 1.34 – 1.25 (m, 4H), 0.88 (m, 3H) ppm;  $^{13}\text{C}$  NMR (75 MHz,  $\text{CDCl}_3$ )  $\delta$  203.1, 136.0, 124.1, 51.2, 32.3, 32.1, 31.3, 30.9, 26.8, 22.1, 20.4, 13.8 ppm; IR (ATR) 2958, 2928, 2873, 2855, 1681, 1422, 1357, 1310, 1250, 1163, 1100, 968, 936  $\text{cm}^{-1}$ ; GC/MS (ESI)  $m/z$  (%) = 209.15 ( $\text{M} + \text{H}^+$ , 28), 191 (15), 167 (16), 149 (20), 135 (13), 123 (23), 113 (100); HRMS (ESI) calc. for  $[\text{C}_{12}\text{H}_{20}\text{O}_2 + \text{Na}^+]$ : 231.1356, found: 231.1346.

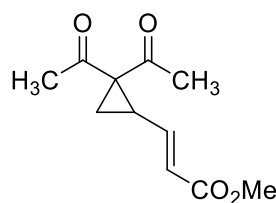

**13**

#### **Methyl (E)-3-(2,2-diacetylcyclopropyl)acrylate (13):**

The reaction was carried out on a 5 mmol scale based on vinylcyclopropane **1**. The *title compound* was purified via column chromatography on silica gel eluting with *n*-pentane/ $\text{Et}_2\text{O}$  2:1 (v/v) to afford 450 mg (43%) of **13** as a tan oil.

$R_f$  = 0.19 (*n*-pentane/Et<sub>2</sub>O, 2:1 (v/v)); <sup>1</sup>H NMR (300 MHz, CDCl<sub>3</sub>) δ 6.34 (dd, *J* = 15.5, 9.9 Hz, 1H), 6.05 (d, *J* = 15.5 Hz, 1H), 3.72 (s, 3H), 2.77 – 2.64 (m, 1H), 2.29 (s, 3H), 2.22 (s, 3H), 1.91 (dd, *J* = 7.0, 5.1 Hz, 1H), 1.59 (dd, *J* = 8.6, 5.1 Hz, 1H) ppm; <sup>13</sup>C NMR (75 MHz, CDCl<sub>3</sub>) δ 201.6, 201.4, 165.9, 143.2, 124.0, 51.7, 51.7, 30.7, 30.5, 27.5, 21.4 ppm; IR (ATR) 2954, 2919, 2849, 1722, 1686, 1651, 1435, 1358, 1308, 1273, 1252, 1204, 1148 cm<sup>-1</sup>; GC/MS (ESI) *m/z* (%) = 211 (*M* + H<sup>+</sup>, 6), 137 (100), 119 (18), 111 (45); HRMS (ESI) calc. for [C<sub>11</sub>H<sub>14</sub>O<sub>4</sub> + Na<sup>+</sup>]: 233.0784, found: 233.0786.

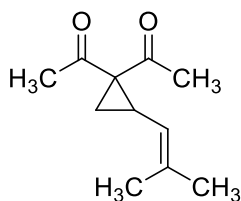

**15**

**1,1'-(2-(2-Methylprop-1-en-1-yl)cyclopropane-1,1-diyl)diethanone (15):**

The reaction was carried out on 6 mmol scale based on vinylcyclopropane **1**. The *title compound* was purified via column chromatography on aluminium oxide (neutral) eluting with *n*-pentane/Et<sub>2</sub>O 4:1 (v/v) to afford 854 mg (79%) of **15** as a pale yellow oil.

$R_f$  = 0.34 (*n*-pentane/Et<sub>2</sub>O, 4:1 (v/v)); <sup>1</sup>H-NMR (300 MHz, CDCl<sub>3</sub>) δ 4.66-4.59 (m, 1H), 2.67 (dd, *J* = 8.6, 16.4 Hz, 1H), 2.22 (s, 3H), 2.18 (s, 3H), 1.78-1.72 (m, 4H), 1.69 (s, 3H), 1.52 (dd, *J* = 4.8, 8.9 Hz, 1H) ppm; <sup>13</sup>C-NMR (75 MHz, CDCl<sub>3</sub>) δ 203.3, 203.2, 138.5, 119.2, 51.0, 30.5, 29.2, 27.2, 25.6, 21.7, 18.4 ppm; IR (ATR) 2916, 1681, 1620, 1451, 1357, 1303, 1252, 1171, 1103, 933, 855, 823 cm<sup>-1</sup>; GC/MS (ESI) *m/z* (%) = 181 (*M* + H<sup>+</sup>, 15), 163 (18), 145 (35), 121 (100), 113 (17), 105 (23); HRMS (ESI) calc. for [C<sub>11</sub>H<sub>16</sub>O<sub>2</sub> + Na<sup>+</sup>]: 203.1043, found: 203.1046.

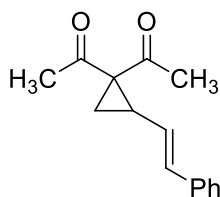

**21**

**1,1'-(2-Styrylcyclopropane-1,1-diyl)bis(ethan-1-one) (21)**

The reaction was carried out on a 7 mmol scale based on vinylcyclopropane **1**. Styrene (210 mmol, 24 mL, 30 equiv.) was used as the source of alkene. The *title compound* was purified via column chromatography on silica gel eluting with petrol ether/EtOAc 5:1 (v/v) followed by semi-prep. HPLC eluting with petrol ether/EtOAc 5:1 (v/v) to afford 340 mg (21%) of **21** as a tan oil.

$R_f$  = 0.25 (petrol ether/EtOAc, 5:1 (v/v)); <sup>1</sup>H NMR (300 MHz, CDCl<sub>3</sub>) δ 7.31 – 7.19 (m, 5H), 6.65 (d, *J* = 15.8 Hz, 1H), 5.66 (dd, *J* = 15.8, 9.0 Hz, 1H), 2.78 (dd, *J* = 16.3, 8.7 Hz, 1H), 2.28 (s, 3H), 2.21 (s, 3H), 1.96 (dd, *J* = 7.3, 5.1 Hz, 1H), 1.59 (dd, *J* = 8.7, 5.1 Hz, 1H) ppm; <sup>13</sup>C NMR (75 MHz, CDCl<sub>3</sub>) δ

202.68, 202.65, 136.38, 134.06, 128.64, 127.80, 126.14, 124.30, 51.62, 32.72, 30.98, 27.12, 21.07 ppm; **IR** (ATR) 3026, 1682, 1598, 1492, 1448, 1358 cm<sup>-1</sup>; **GC/MS** (ESI) *m/z* (%) = 251 (100) [M<sup>+</sup> + Na]; **HRMS** (ESI) calc. for [C<sub>15</sub>H<sub>16</sub>O<sub>2</sub> + Na<sup>+</sup>]: 251.1043, found: 251.1030.

## 7. Preparation of Arylcyclopropanes

### General Procedure II: Preparation of Arylcyclopropanes

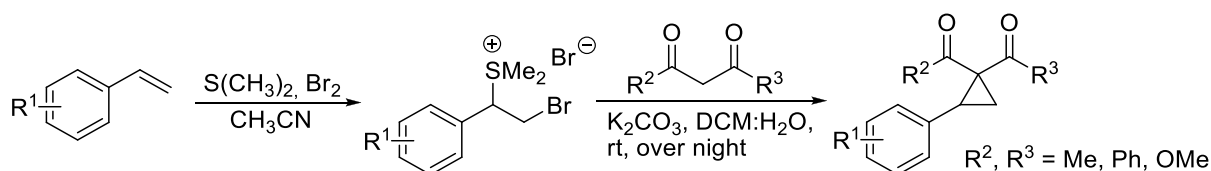

The procedure was modified from the literature.<sup>[4]</sup> A solution of bromine (1.02 mL, 20 mmol) in CH<sub>2</sub>Cl<sub>2</sub> (5 mL) was added in a solution of dimethyl sulfide (7.34 mL, 100 mmol) in CH<sub>3</sub>CN (20 mL) at 0 °C to give a yellow precipitate. The corresponding styrene derivative (20 mmol) was then added at the same temperature. The reaction mixture was allowed to warm to room temperature and stirred for 2 hours. Diethyl ether (30 mL) was added to give a precipitate, which was then filtered and washed with diethyl ether to give the corresponding bromosulfonium bromide without further purification.

The bromosulfonium bromide (10 mmol) and potassium carbonate (4.15 g, 30 mmol) were dissolved in CH<sub>2</sub>Cl<sub>2</sub>:H<sub>2</sub>O (1:1) mixture (200 mL). Pentane-2,4-dione (2.05 mL, 20 mmol), 1,3-diphenyl-1,3-propanedione (4.49 g, 20 mmol) or methyl acetoacetate (2.15 mL, 20 mmol) was added and stirred at room temperature overnight. The CH<sub>2</sub>Cl<sub>2</sub> layer was separated and the aqueous layer was extracted with 3 portions of CH<sub>2</sub>Cl<sub>2</sub>. The combined organic layers were dried over MgSO<sub>4</sub>, filtered and then concentrated under reduced pressure. The residue was purified by column chromatography on silica gel eluting with *n*-pentane/Et<sub>2</sub>O (5:1 to 2:1) to give the desired arylcyclopropane.

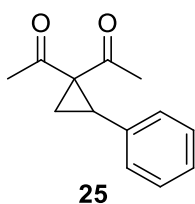

#### 1,1'-(2-Phenylcyclopropane-1,1-diyl)bis(ethan-1-one) (**25**):<sup>[6]</sup>

The *title compound* was purified via column chromatography on silica gel eluting with *n*-pentane/Et<sub>2</sub>O 5:1 (v/v) to afford 656 mg (22% two steps overall yield) of **25** as a colorless solid.

*R<sub>f</sub>* = 0.23 (*n*-pentane/Et<sub>2</sub>O, 5:1 (v/v)); **mp** 61–62 °C [lit. 58 °C]; **<sup>1</sup>H-NMR** (300 MHz, CDCl<sub>3</sub>) δ 7.31–7.21 (m, 3H), 7.15–7.12 (m, 2H), 3.29 (bt, *J* = 8.5 Hz, 1H), 2.28 (s, 3H), 2.26 (dd, *J* = 5.3, 7.9 Hz, 1H), 1.81 (s, 3H), 1.65 (dd, *J* = 5.3, 9.0 Hz, 1H) ppm; **<sup>13</sup>C-NMR** (75 MHz, CDCl<sub>3</sub>) δ 202.7, 202.2, 134.1, 128.5, 128.4, 127.5, 52.7, 33.6, 30.4, 27.7, 19.1 ppm; **IR** (ATR) 3098, 3065, 3020, 1702, 1681, 1453 cm<sup>-1</sup>; **HRMS** (ESI): calc. for [C<sub>13</sub>H<sub>14</sub>O<sub>2</sub> + Na<sup>+</sup>]: 225.0886, found: 225.0871.

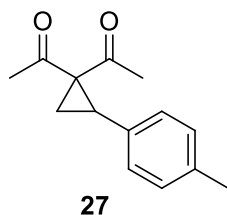

**1,1'-(2-(*p*-Tolyl)cyclopropane-1,1-diyl)bis(ethan-1-one) (27):**<sup>[6]</sup>

The *title compound* was purified via column chromatography on silica gel eluting with *n*-pentane/Et<sub>2</sub>O 3:1 (v/v) to afford 1000 mg (23% two steps overall yield) of **27** as a yellow solid.

*R<sub>f</sub>* = 0.38 (*n*-pentane /Et<sub>2</sub>O, 3:1 (v/v)); **mp** 52-54 °C [lit.57.6-59 °C]; **<sup>1</sup>H NMR** (300 MHz, CDCl<sub>3</sub>) δ 7.10 (m, 2H), 7.06 – 7.01 (m, 2H), 3.27 (t, *J* = 8.5 Hz, 1H), 2.32 (s, 3H), 2.30 – 2.23 (m, 4H), 1.84 (s, 3H), 1.67 (dd, *J* = 8.0, 4.3 Hz, 1H) ppm; **<sup>13</sup>C NMR** (75 MHz, CDCl<sub>3</sub>) δ (ppm) 202.9, 202.4, 137.3, 130.9, 129.2, 128.3, 52.7, 33.6, 30.5, 27.6, 21.1, 19.1 ppm; **IR** (ATR) 3013, 2923, 1681, 1517, 1425, 1356 cm<sup>-1</sup>; **HRMS** (ESI): calc. for [C<sub>14</sub>H<sub>16</sub>O<sub>2</sub> + Na<sup>+</sup>]: 239.1043, found: 239.1033.

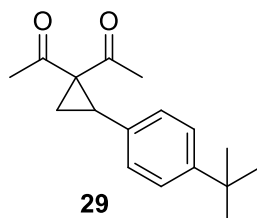

**1,1'-(2-(4-(*tert*-Butyl)phenyl)cyclopropane-1,1-diyl)bis(ethan-1-one) (29):**<sup>[5]</sup>

The *title compound* was purified via column chromatography on silica gel eluting with *n*-pentane/Et<sub>2</sub>O 3:1 (v/v) to afford 504 mg (8% two steps overall yield) of **29** as a colorless solid.

*R<sub>f</sub>* = 0.35 (*n*-pentane /Et<sub>2</sub>O, 3:1 (v/v)); **mp** 51-53 °C; **<sup>1</sup>H NMR** (300 MHz, CDCl<sub>3</sub>) δ 7.31 – 7.27 (m, 2H), 7.08 – 7.03 (m, 2H), 3.25 (t, *J* = 8.5 Hz, 1H), 2.27 (s, 3H), 2.24 (dd, *J* = 8.0, 5.3 Hz, 1H), 1.82 (s, 3H), 1.65 (dd, *J* = 9.1, 5.3 Hz, 1H), 1.28 (s, 9H) ppm; **<sup>13</sup>C NMR** (75 MHz, CDCl<sub>3</sub>) δ 202.9, 202.6, 150.6, 130.9, 128.0, 125.5, 52.7, 34.4, 33.5, 31.3, 30.5, 27.7, 19.2 ppm; **IR** (ATR) 2962, 2869, 1684, 1518, 1425, 1359 cm<sup>-1</sup>; **HRMS** (ESI): calc. for [C<sub>17</sub>H<sub>22</sub>O + Na<sup>+</sup>]: 281.1512, found: 281.1494.

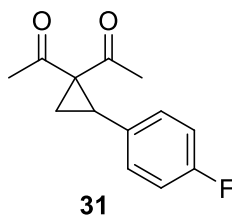

**1,1'-(2-(4-Fluorophenyl)cyclopropane-1,1-diyl)bis(ethan-1-one) (31):**

The *title compound* was purified via column chromatography on silica gel eluting with *n*-pentane/Et<sub>2</sub>O 3:1 (v/v) to afford 815 mg (37% two steps overall yield) of **31** as a colorless oil.

$R_f$  = 0.17 (*n*-pentane/Et<sub>2</sub>O, 3:1 (v/v)); **<sup>1</sup>H-NMR** (300 MHz, CDCl<sub>3</sub>) δ 7.15-7.07 (m, 2H), 7.02-6.93 (m, 2H), 3.27 (t, *J* = 8.5 Hz, 1H), 2.28 (s, 3H), 2.22 (dd, *J* = 5.4, 7.9 Hz, 1H), 1.84 (s, 3H), 1.64 (dd, *J* = 5.4, 9.1 Hz, 1H) ppm; **<sup>13</sup>C-NMR** (75 MHz, CDCl<sub>3</sub>) δ 202.6, 201.9, 162.1 (d, *J* = 245.2 Hz), 130.0 (d, *J* = 8.1 Hz), 129.9 (d, *J* = 3.24 Hz), 115.5 (d, *J* = 21.5 Hz), 52.6, 32.8, 30.5, 27.8, 19.3 ppm; **IR** (ATR) 3010, 1684, 1605, 1512, 1430, 1359, 1224, 842 cm<sup>-1</sup>; **HRMS** (ESI) calc. for [C<sub>13</sub>H<sub>13</sub>FO<sub>2</sub> + Na<sup>+</sup>]: 243.0792, found: 243.0802.

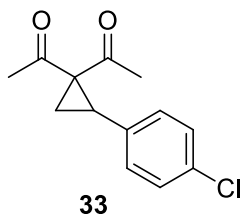

**1,1'-(2-(4-Chlorophenyl)cyclopropane-1,1-diyl)bis(ethan-1-one) (33):**<sup>[6]</sup>

The *title compound* was purified via column chromatography on silica gel eluting with *n*-pentane/Et<sub>2</sub>O 2:1 (v/v) to afford 899 mg (38% two steps overall yield) of **33** as a colorless solid.

$R_f$  = 0.28 (*n*-pentane/Et<sub>2</sub>O, 2:1 (v/v)); **mp** 77-78 °C [lit. 76.6-77.5 °C]; **<sup>1</sup>H-NMR** (300 MHz, CDCl<sub>3</sub>) δ 7.29-7.22 (m, 2H), 7.10-7.04 (m, 2H), 3.26 (t, *J* = 8.5 Hz, 1H), 2.28 (s, 3H), 2.22 (dd, *J* = 5.3, 7.8 Hz, 1H), 1.86 (s, 3H), 1.64 (dd, *J* = 5.4, 9.1 Hz, 1H) ppm; **<sup>13</sup>C-NMR** (75 MHz, CDCl<sub>3</sub>) δ 202.4, 201.7, 133.4, 132.7, 129.7, 128.7, 52.7, 32.8, 30.5, 27.8, 19.1 ppm; **IR** (ATR) 3087, 3053, 1705, 1670, 1593, 1494, 1404, 1373, 1104, 851, 592, 560 cm<sup>-1</sup>; **HRMS** (ESI) calc. for [C<sub>13</sub>H<sub>13</sub>ClO<sub>2</sub> + Na<sup>+</sup>]: 259.0496, found: 259.0485.

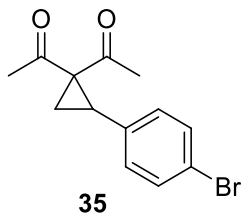

**1,1'-(2-(4-Bromophenyl)cyclopropane-1,1-diyl)bis(ethan-1-one) (35):**<sup>[6]</sup>

The *title compound* was purified via column chromatography on silica gel eluting with *n*-pentane/Et<sub>2</sub>O 3:1 (v/v) to afford 534 mg (19% two steps overall yield) of **35** as a colorless solid.

$R_f$  = 0.3 (*n*-pentane/Et<sub>2</sub>O, 3:1 (v/v)); **mp** 75-76 °C [lit. 72.2-73.2 °C]; **<sup>1</sup>H-NMR** (300 MHz, CDCl<sub>3</sub>) δ 7.45-7.37 (m, 2H), 7.06-6.97 (m, 2H), 3.24 (t, *J* = 8.5, 1H), 2.28 (s, 3H), 2.22 (dd, *J* = 5.4, 7.8 Hz, 1H), 1.86 (s, 3H), 1.63 (dd, *J* = 5.4, 9.0 Hz, 1H) ppm; **<sup>13</sup>C-NMR** (75 MHz, CDCl<sub>3</sub>) δ 202.4, 201.7, 133.3, 131.7, 130.1, 121.6, 52.7, 32.8, 30.5, 27.8, 19.1 ppm; **IR** (ATR) 3008, 1681, 1491, 1357, 1027, 822 cm<sup>-1</sup>; **HRMS** (ESI) calc. for [C<sub>13</sub>H<sub>13</sub>BrO<sub>2</sub> + Na<sup>+</sup>]: 280.0099, found: 280.0103.

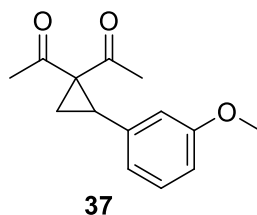

**1,1'-(2-(3-Methoxyphenyl)cyclopropane-1,1-diyl)bis(ethan-1-one) (37):**

The *title compound* was purified via column chromatography on silica gel eluting with *n*-pentane/Et<sub>2</sub>O 2:1 (v/v) to afford 813 mg (35% two steps overall yield) of **37** as a colorless oil.

$R_f$  = 0.21 (*n*-pentane/Et<sub>2</sub>O, 2:1 (v/v)); <sup>1</sup>H-NMR (300 MHz, CDCl<sub>3</sub>) δ 7.19 (t, *J* = 7.92 Hz, 1H), 6.81-6.75 (m, 1H), 6.74-6.65 (m, 2H), 3.78 (s, 3H), 3.26 (t, *J* = 8.5 Hz, 1H), 2.28 (s, 3H), 2.22 (dd, *J* = 5.3, 7.9 Hz, 1H), 1.84 (s, 3H), 1.64 (dd, *J* = 5.3, 9.0 Hz, 1H) ppm; <sup>13</sup>C-NMR (75 MHz, CDCl<sub>3</sub>) δ 202.7, 202.3, 159.6, 135.8, 129.5, 120.6, 114.1, 113.0, 55.2, 52.6, 33.5, 30.4, 27.7, 19.3 ppm; IR (ATR) 3006, 2926, 2838, 1683, 1601, 1584, 1492, 1358, 1256, 783, 721 cm<sup>-1</sup>; HRMS (ESI) calc. for [C<sub>14</sub>H<sub>16</sub>O<sub>3</sub> + Na<sup>+</sup>]: 255.0992, found: 255.0981.

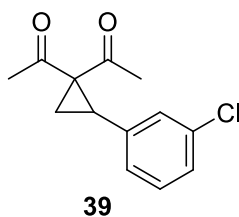

**1,1'-(2-(3-Chlorophenyl)cyclopropane-1,1-diyl)bis(ethan-1-one) (39):**

The *title compound* was purified via column chromatography on silica gel eluting with *n*-pentane/Et<sub>2</sub>O 3:1 (v/v) to afford 402 mg (17% two steps overall yield) of **39** as a colorless oil.

$R_f$  = 0.24 (*n*-pentane/Et<sub>2</sub>O, 3:1 (v/v)); <sup>1</sup>H-NMR (300 MHz, CDCl<sub>3</sub>) δ 7.24-7.19 (m, 2H), 7.18-7.14 (m, 1H), 7.04-6.96 (m, 1H), 3.26 (t, *J* = 8.5 Hz, 1H), 2.29 (s, 3H), 2.22 (dd, *J* = 5.3, 7.9 Hz, 1H), 1.88 (s, 3H), 1.64 (dd, *J* = 5.4, 9.1 Hz, 1H) ppm; <sup>13</sup>C-NMR (75 MHz, CDCl<sub>3</sub>) δ 202.3, 201.6, 136.4, 134.4, 129.7, 128.7, 127.8, 126.5, 52.6, 32.7, 30.5, 27.8, 19.1 ppm; IR (ATR) 3009, 2927, 1687, 1598, 1421, 1309, 781, 699 cm<sup>-1</sup>; HRMS (ESI) calc. for [C<sub>13</sub>H<sub>13</sub>ClO<sub>2</sub> + Na<sup>+</sup>]: 259.0496, found: 259.0483.

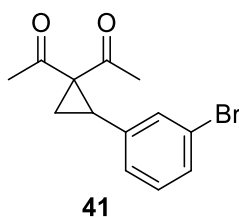

**1,1'-(2-(3-Bromophenyl)cyclopropane-1,1-diyl)bis(ethan-1-one) (41):**

The *title compound* was purified via column chromatography on silica gel eluting with *n*-pentane/Et<sub>2</sub>O 3:1 (v/v) to afford 712 mg (13% two steps overall yield) of **41** as a colorless oil.

$R_f$  = 0.33 (*n*-pentane /Et<sub>2</sub>O, 3:1 (v/v)); **<sup>1</sup>H NMR** (300 MHz, CDCl<sub>3</sub>)  $\delta$  7.40 – 7.35 (m, 1H), 7.32 (t,  $J$  = 1.8 Hz, 1H), 7.15 (t,  $J$  = 7.8 Hz, 1H), 7.04 (d,  $J$  = 7.8 Hz, 1H), 3.25 (t,  $J$  = 8.4 Hz, 1H), 2.29 (s, 3H), 2.22 (dd,  $J$  = 7.9, 5.4 Hz, 1H), 1.88 (s, 3H), 1.63 (dd,  $J$  = 9.0, 5.4 Hz, 1H) ppm; **<sup>13</sup>C NMR** (75 MHz, CDCl<sub>3</sub>)  $\delta$  202.3, 201.6, 136.7, 131.7, 130.7, 130.0, 126.9, 122.6, 52.6, 32.7, 30.5, 27.9, 19.1 ppm; **IR** (ATR) 3059, 3010, 2923, 1683, 1594, 1564, 1478, 1421, 1357 cm<sup>-1</sup>; **HRMS** (ESI): calc. for [C<sub>13</sub>H<sub>13</sub>BrO<sub>2</sub> + Na<sup>+</sup>]: 304.9972, found: 304.9974.

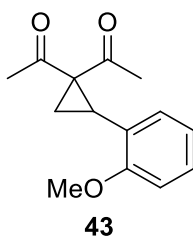

**1,1'-(2-(2-Methoxyphenyl)cyclopropane-1,1-diyl)bis(ethan-1-one) (**43**):**

The *title compound* was purified via column chromatography on silica gel eluting with *n*-pentane/Et<sub>2</sub>O 3:1 (v/v) to afford 760 mg (43% two steps overall yield) of **43** as a colorless solid.

$R_f$  = 0.24 (*n*-pentane /Et<sub>2</sub>O, 3:1 (v/v)); **mp** 60-63 °C; **<sup>1</sup>H NMR** (300 MHz, CDCl<sub>3</sub>)  $\delta$  7.22 (m, 1H), 6.98 (m, 1H), 6.87 (m, 2H), 3.84 (s, 3H), 3.24 (t,  $J$  = 8.7 Hz, 1H), 2.30 – 2.25 (m, 4H), 1.82 (s, 3H), 1.69 (dd,  $J$  = 9.0, 5.3 Hz, 1H) ppm; **<sup>13</sup>C NMR** (75 MHz, CDCl<sub>3</sub>)  $\delta$  203.9, 202.2, 158.6, 128.9, 128.6, 122.6, 120.4, 109.8, 55.3, 51.6, 30.2, 29.4, 27.1, 17.5 ppm; **IR** (ATR) 3006, 2939, 2838, 1682, 1601, 1495 cm<sup>-1</sup>; **HRMS** (ESI): calc. for [C<sub>14</sub>H<sub>16</sub>O<sub>3</sub> + Na<sup>+</sup>]: 255.0992, found: 255.0982.

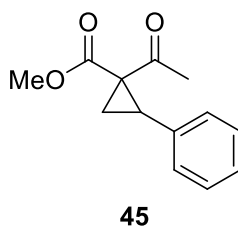

**Methyl 1-acetyl-2-phenylcyclopropane-1-carboxylate (**45**)**

The *title compound* was purified via column chromatography on silica gel eluting with *n*-pentane/Et<sub>2</sub>O 5:1 (v/v) to afford 806 mg (24% two steps overall yield) of **45** as a colorless oil as a 3:1 mixture of *cis*- and *trans*-isomers.

$R_f$  = 0.45 (*n*-pentane/Et<sub>2</sub>O, 5:1 (v/v)); **<sup>1</sup>H-NMR** (300 MHz, CDCl<sub>3</sub>)  $\delta$  7.30-7.11 (m, 5H *cis*, 5H *trans*), 3.81 (s, 3H *trans*); 3.35 (s, 3H *cis*), 3.28 (bt,  $J$  = 8.7 Hz, 1H *cis*), 3.27 (bt,  $J$  = 8.7 Hz, 1H *trans*), 2.45 (s, 3H *cis*), 2.31 (dd,  $J$  = 5.0, 8.1 Hz, 1H *trans*), 2.24 (dd,  $J$  = 4.6, 8.1 Hz, 1H *cis*), 1.93 (s, 3H *trans*), 1.74 (dd,  $J$  = 4.7, 9.2 Hz, 1H *cis*), 1.71 (dd,  $J$  = 5.1 9.1 Hz, 1H *trans*) ppm; **<sup>13</sup>C-NMR** (75 MHz, CDCl<sub>3</sub>)  $\delta$  202.2 (*cis*), 199.9 (*trans*), 171.0 (*trans*), 168.7 (*cis*), 134.8 (*cis*), 133.7 (*trans*), 128.7 (*cis*),

128.4 (trans), 128.3 (trans), 128.1 (cis), 127.5 (trans), 127.4 (cis), 52.6 (trans), 51.9 (cis), 44.6 (cis), 44.2 (trans), 35.5 (cis), 34.5 (trans), 30.2 (trans), 29.6 (cis), 21.6 (cis), 17.8 (trans) ppm; **IR** (ATR) 3031, 3005, 2952, 1733, 1690, 1604, 1499, 1454, 1435  $\text{cm}^{-1}$ ; **HRMS** (EI): calc. for  $[\text{C}_{13}\text{H}_{14}\text{O}_3]$ : 218.0943, found: 218.0947.

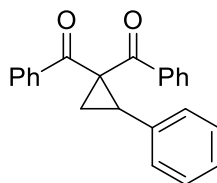

**47**

### **(2-Phenylcyclopropane-1,1-diyl)bis(phenylmethanone) (47)**

The *title compound* was purified via column chromatography on silica gel eluting with *n*-pentane/Et<sub>2</sub>O 10:1 (v/v) to afford 1.16 g (23% two steps overall yield) of **47** as a colorless solid.

$R_f$  = 0.37 (*n*-pentane/Et<sub>2</sub>O, 10:1 (v/v)); **mp** 130-131 °C; **<sup>1</sup>H-NMR** (300 MHz, CDCl<sub>3</sub>)  $\delta$  7.78-7.73 (m, 2H), 7.59-7.56 (m, 2H); 7.39-7.34 (m, 1H), 7.28-7.22 (m, 5H), 7.18- 7.05 (m, 5H), 3.99 (bt,  $J$  = 8.5 Hz, 1H), 2.84 (dd,  $J$  = 4.8, 8.2 Hz, 1H), 1.73 (dd,  $J$  = 5.0, 9.1 Hz, 1H) ppm; **<sup>13</sup>C-NMR** (75 MHz, CDCl<sub>3</sub>)  $\delta$  197.0, 194.4, 137.8, 137.7, 134.1, 132.9, 132.7, 128.6, 128.5, 128.4, 128.2, 128.1, 127.1, 49.8, 32.4, 19.7; **IR** (ATR) 3085, 3064, 3004, 1656, 1595, 1576, 1499, 1447  $\text{cm}^{-1}$ ; **HRMS** (ESI): calc. for  $[(\text{C}_{23}\text{H}_{18}\text{O}_2 + \text{Na}^+)]$ : 349.1199, found: 349.1195.

## **8. NBu<sub>4</sub>[Fe(CO)<sub>3</sub>(NO)] (TBAFe)-catalyzed Cloke-Wilson Rearrangement of Vinylcyclopropanes**

### **General procedure III: Thermal conditions for the CWR of VCPs**

TBAFe (10.3 mg, 0.025 mmol) was weighed into a dried Schlenk tube. Anhydrous CH<sub>2</sub>Cl<sub>2</sub> (5 mL) was added and the mixture stirred until homogenous. 1 mL (0.005 mmol TBAFe) of this solution was transferred to a separate dried Schlenk tube which was subsequently charged with the appropriate vinylcyclopropane (0.5 mmol). The Schlenk tube was sealed under an atmosphere of dry nitrogen and heated to 45 °C for 14 h. The solvent was removed under reduced pressure and the residue subjected to column chromatography on silica gel.

### **General procedure IV: UV-Light conditions for the CWR of VCPs**

A 10-mL Schlenk tube was charged with vinylcyclopropane (0.40 mmol, 1 equiv.), TBAFe (0.001 mmol, 0.025 equiv.), and CH<sub>3</sub>CN (1 mL) under N<sub>2</sub>. The reactions were carried out at room temperature under irradiation of UV light (180 W, Hg lamp or 75 W, Xenon lamp at distance of 15 cm) or Visible light (23 W, Compact Fluorescent Lamp at distance of 15 cm) for 3 h. The reaction was quenched with diethyl ether and concentrated *in vacuo*. Purification by silica column chromatography afforded the desired dihydrofuran product.



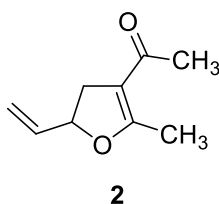

**1-(2-Methyl-5-vinyl-4,5-dihydrofuran-3-yl)ethanone (2):<sup>[1]</sup>**

**Thermal condition:**

The *title compound* was purified via column chromatography on silica gel eluting with *n*-pentane/Et<sub>2</sub>O 2:1 (v/v) to afford 71.3 mg (94%) of **2** as a colorless oil.

**UV-Light (180 W, Hg Lamp) condition:**

The *title compound* was purified via column chromatography on silica gel eluting with *n*-pentane/Et<sub>2</sub>O 2:1 (v/v) to afford 58.4 mg (96%) of **2** as a colorless oil.

**UV-Light (75 W, Xenon Lamp) condition:**

The *title compound* was purified via column chromatography on silica gel eluting with *n*-pentane/Et<sub>2</sub>O 2:1 (v/v) to afford 56.6 mg (93%) of **2** as a colorless oil.

**Visible-Light (23 W, Compact Fluorescent Lamp) condition:**

The *title compound* was purified via column chromatography on silica gel eluting with *n*-pentane/Et<sub>2</sub>O 2:1 (v/v) to afford 56.0 mg (92%) of **2** as a colorless oil.

$R_f$  = 0.16 (*n*-pentane/Et<sub>2</sub>O, 2:1 (v/v)); <sup>1</sup>H-NMR (250 MHz, CDCl<sub>3</sub>) δ 5.93 (ddd, *J* = 17.0, 10.3, 6.6 Hz, 1H), 5.31 (dt, *J* = 17.1, 1.1 Hz, 1H), 5.22 (dt, *J* = 10.4, 1.1 Hz, 1H), 5.09-4.99 (m, 1H), 3.18-3.08 (m, 1H), 2.78-2.69 (m, 1H), 2.24 (t, *J* = 1.4 Hz, 3H), 2.20 (s, 3H) ppm; <sup>13</sup>C-NMR (63 MHz, CDCl<sub>3</sub>) δ 194.4, 167.3, 136.7, 116.9, 111.9, 82.6, 36.3, 29.4, 15.0 ppm; IR (ATR, neat) 3409, 3086, 2989, 2923, 2864, 1670, 1593 cm<sup>-1</sup>; GC/MS (EI, 70 eV) *m/z* (%) 152 (M<sup>+</sup>, 100), 137 (36), 109 (72), 95 (26), 91 (40), 67 (45).

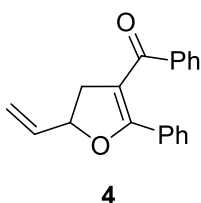

**Phenyl(2-phenyl-5-vinyl-4,5-dihydrofuran-3-yl)methanone (4):<sup>[7]</sup>**

**Thermal condition:**

The *title compound* was purified via column chromatography on silica gel eluting with *n*-pentane/Et<sub>2</sub>O 10:1 (v/v) to afford 126.5 mg (92%) of **4** as a colorless solid.

**UV-Light (180 W, Hg Lamp) condition:**

The *title compound* was purified via column chromatography on silica gel eluting with *n*-pentane/Et<sub>2</sub>O 10:1 (v/v) to afford 102.8 mg (93%) of **4** as a colorless solid.

$R_f = 0.13$  (*n*-pentane/Et<sub>2</sub>O, 10:1 (v/v)); **<sup>1</sup>H-NMR** (300 MHz, CDCl<sub>3</sub>) δ 7.45-7.43 (m, 2H), 7.24-7.15 (m, 4H), 7.10-7.03 (m, 4H), 6.10 (ddd,  $J = 6.5, 10.2, 17.0$  Hz, 1H), 5.46 (td,  $J = 1.1$  Hz, 17.1 Hz, 1H), 5.23-5.33 (m, 2H), 3.45 (dd,  $J = 9.9, 14.7$  Hz, 1H), 3.14 (dd,  $J = 8.3, 14.9$  Hz, 1H) ppm; **<sup>13</sup>C-NMR** (63 MHz, CDCl<sub>3</sub>) δ 193.4, 165.5, 139.0, 136.6, 131.1, 130.0, 129.9, 129.4, 128.9, 127.6, 127.58, 117.2, 111.7, 82.5, 38.7 ppm; **IR** (ATR, neat) 3081, 3027, 2985, 2848, 1615, 1600, 1587, 1565, 1487 cm<sup>-1</sup>; **HRMS** (ESI) calc. for [C<sub>19</sub>H<sub>16</sub>O<sub>2</sub>+Na<sup>+</sup>]: 299.1043, found 299.1054.

**(R)-4**:  $[\alpha]_D^{20}$ : -22.5 (c = 5.33, CHCl<sub>3</sub>); **(S)-4**:  $[\alpha]_D^{20}$ : +22.5 (c = 5.33, CHCl<sub>3</sub>).

Data File C:\HPCHEM\1\DATA\DP\DP26A000.D

Sample Name: DP26A

Chiralcel OD-H; Heptan/Isopropanol 95:5, 0.5 mL/min; 3µl

Injection Date : 26.05.15 15:59:57

Sample Name : DP26A

Acq. Operator : Dominik

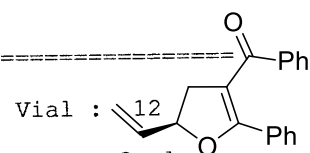

Inj Volume : 3 µl

Method : C:\HPCHEM\1\METHODS\BPOD9\_1.M

Last changed : 22.05.15 15:55:29 by Dominik

Product of thermal condition

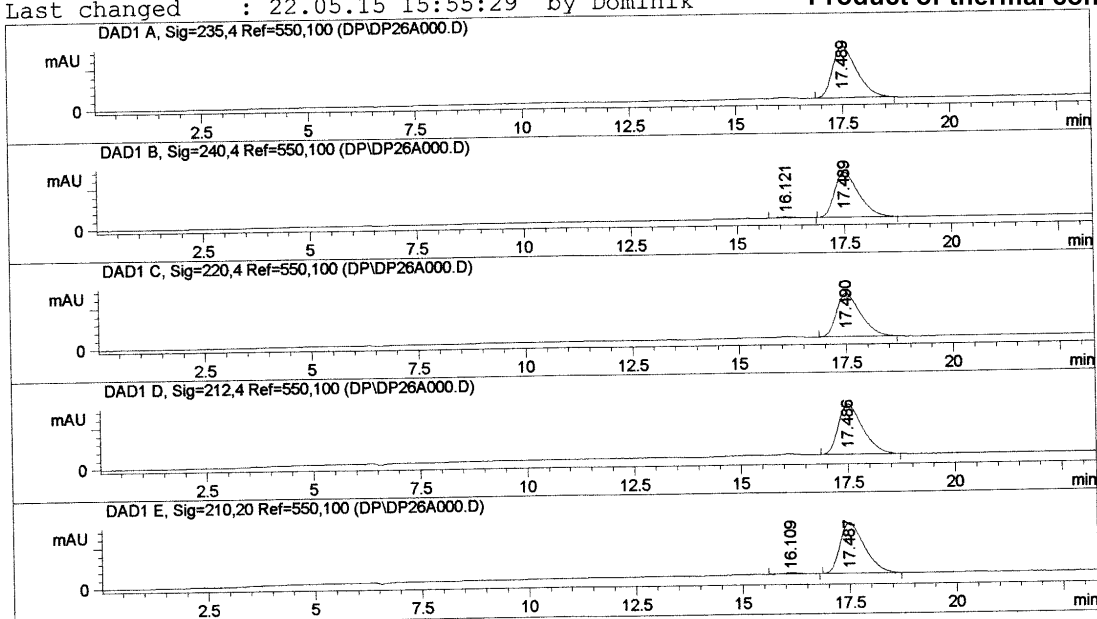

### Area Percent Report

Sorted By : Signal  
Multiplier : 1.0000  
Dilution : 1.0000

Signal 1: DAD1 A, Sig=235,4 Ref=550,100

| Peak # | RetTime [min] | Type | Width [min] | Area [mAU*s] | Height [mAU] | Area %   |
|--------|---------------|------|-------------|--------------|--------------|----------|
| 1      | 17.489        | BB   | 0.5846      | 2485.33032   | 62.94952     | 100.0000 |

Totals : 2485.33032 62.94952

Results obtained with enhanced integrator!

Instrument 1 15.06.15 10:09:49 Dominik

Page 1 of 2

Data File C:\HPCHEM\1\DATA\DP\DP26B000.D

Sample Name: DP26B

Chiralcel OD-H; Heptan/Isopropanol 95:5, 0.5 mL/min; 3µl

Injection Date : 26.05.15 16:25:38  
Sample Name : DP26B  
Acq. Operator : Dominik

Vial : 12  
Inj Volume : 3 µl

Method : C:\HPCHEM\1\METHODS\BPOD9 1.M  
Last changed : 22.05.15 15:55:29 by Dominik

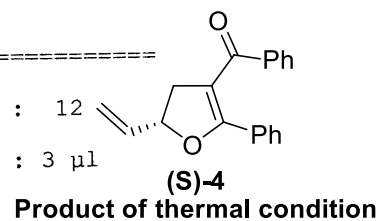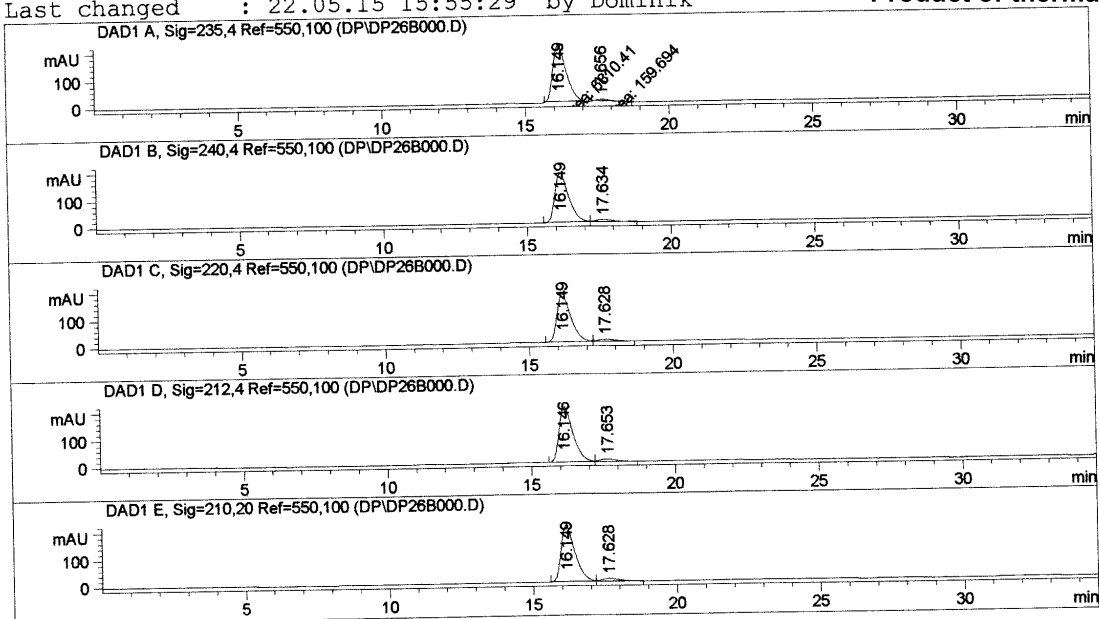

### Area Percent Report

Sorted By : Signal  
Multiplier : 1.0000  
Dilution : 1.0000

Signal 1: DAD1 A, Sig=235,4 Ref=550,100

| Peak # | RetTime [min] | Type | Width [min] | Area [mAU*s] | Height [mAU] | Area %  |
|--------|---------------|------|-------------|--------------|--------------|---------|
| 1      | 16.149        | MM   | 0.5504      | 6810.40723   | 206.22845    | 97.7089 |
| 2      | 17.656        | MM   | 0.4684      | 159.69370    | 5.68170      | 2.2911  |

Totals : 6970.10092 211.91015

Results obtained with enhanced integrator!

Data File C:\HPCHEM\1\DATA\DP\CL-24A00.D

Sample Name: CL-24A

Chiralcel OD-H; Heptan/Isopropanol 95:5, 0.5 mL/min; 3µl

Injection Date : 22.05.15 14:34:47

Sample Name : CL-24A

Acq. Operator : Dominik

Vial : 11

Inj Volume : 3 µl

Acq. Method : C:\HPCHEM\1\METHODS\BPOD9\_1.M

Last changed : 22.05.15 14:33:48 by Dominik

(modified after loading)

Analysis Method : C:\HPCHEM\1\METHODS\BPOD9\_1.M

Last changed : 22.05.15 15:55:29 by Dominik

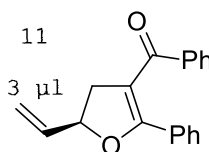

(R)-4

Product of photochemical condition

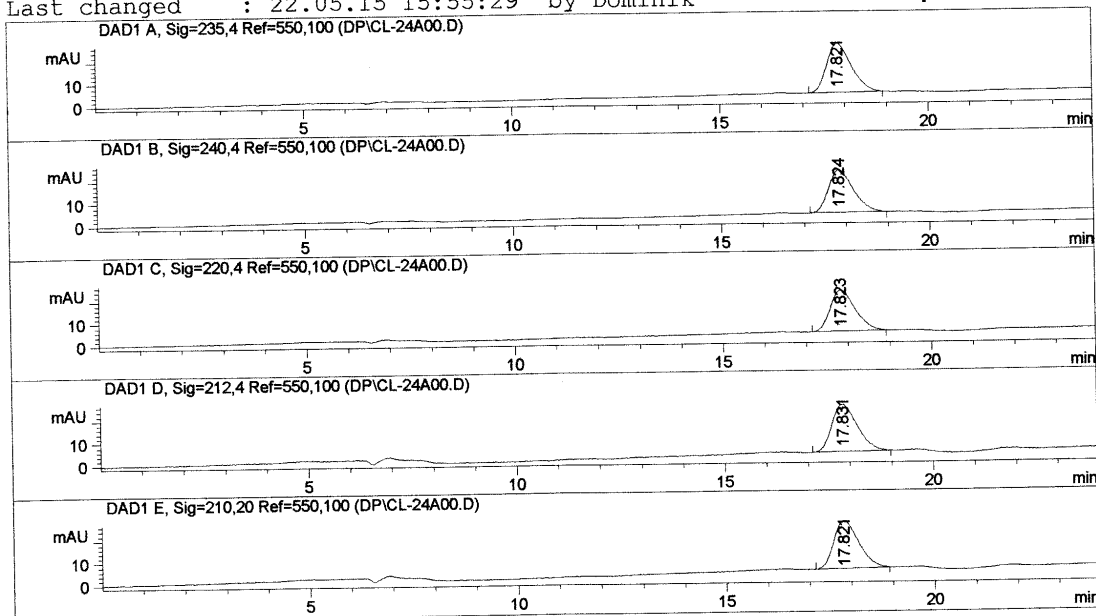

### Area Percent Report

Sorted By : Signal  
Multiplier : 1.0000  
Dilution : 1.0000

Signal 1: DAD1 A, Sig=235,4 Ref=550,100

| Peak # | RetTime [min] | Type | Width [min] | Area [mAU*s] | Height [mAU] | Area %   |
|--------|---------------|------|-------------|--------------|--------------|----------|
| 1      | 17.821        | BB   | 0.5863      | 908.40143    | 21.97522     | 100.0000 |

Totals : 908.40143 21.97522

Results obtained with enhanced integrator!

Instrument 1 26.05.15 10:55:58 Dominik

Page 1 of 2

data File C:\HPCHEM\1\DATA\DP\CL-24B00.D

Sample Name: CL-24B

Chiralcel OD-H; Heptan/Isopropanol 95:5, 0.5 mL/min; 3µl

Injection Date : 22.05.15 14:59:51  
Sample Name : CL-24B  
Acq. Operator : Dominik

Vial : 10

Inj Volume : 3 µl

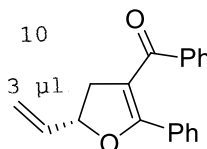

(S)-4

Product of photochemical condition

Acq. Method : C:\HPCHEM\1\METHODS\BPOD9\_1.M  
Last changed : 22.05.15 14:33:48 by Dominik  
(modified after loading)  
Analysis Method : C:\HPCHEM\1\METHODS\BPOD9\_1.M  
Last changed : 22.05.15 15:55:29 by Dominik

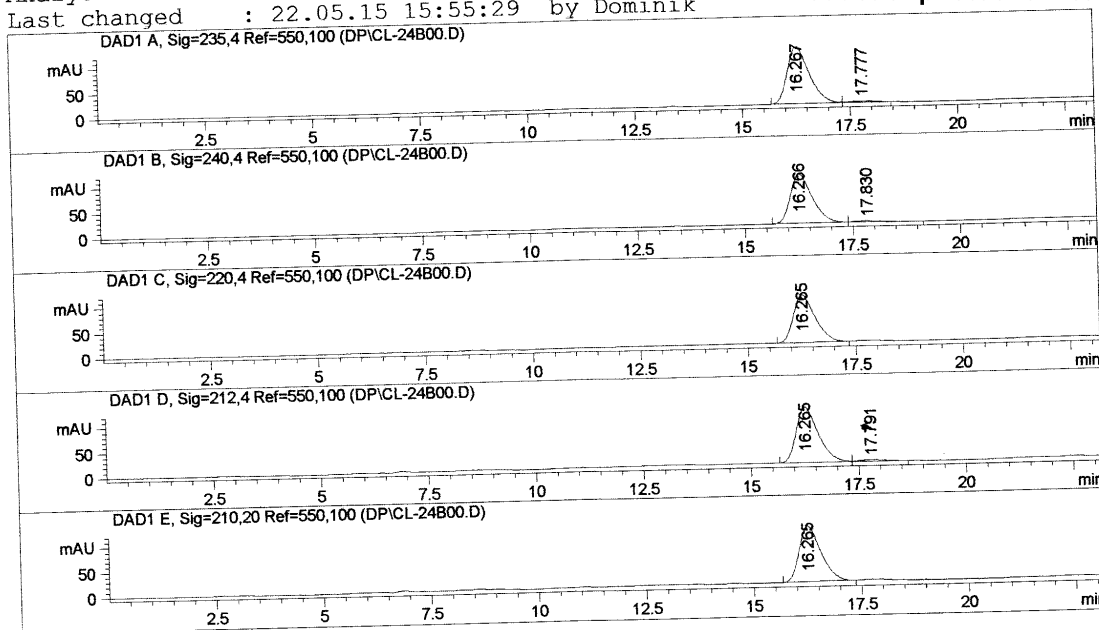

### Area Percent Report

Sorted By : Signal  
Multiplier : 1.0000  
Dilution : 1.0000

Signal 1: DAD1 A, Sig=235,4 Ref=550,100

| Peak # | RetTime [min] | Type | Width [min] | Area [mAU*s] | Height [mAU] | Area %  |
|--------|---------------|------|-------------|--------------|--------------|---------|
| 1      | 16.267        | BB   | 0.5276      | 4053.75537   | 113.80764    | 97.3832 |
| 2      | 17.777        | BB   | 0.4835      | 108.92802    | 2.71816      | 2.6168  |

Totals : 4162.68339 116.52580

Results obtained with enhanced integrator!

Instrument 1 26.05.15 10:58:12 Dominik

Page 1 of 2

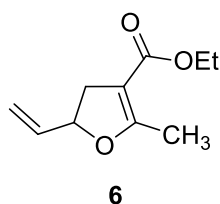

**Ethyl 2-methyl-5-vinyl-4,5-dihydrofuran-3-carboxylate (6):<sup>[1]</sup>**

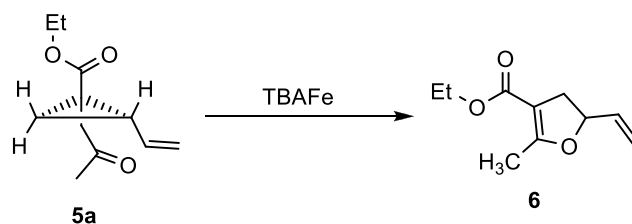

**Thermal condition:**

Starting from diastereoisomer **5a**: The *title compound* was purified via column chromatography on silica gel eluting with *n*-pentane/Et<sub>2</sub>O 15:1 (v/v) to afford 84.6 mg (93%) of **6** as a colorless oil.

**UV-Light (180 W, Hg Lamp) condition:**

Starting from diastereoisomer **5a**: The *title compound* was purified via column chromatography on silica gel eluting with *n*-pentane/Et<sub>2</sub>O 15:1 (v/v) to afford 68.5 mg (94%) of **6** as a colorless oil.

**Visible-Light (23 W, Compact Fluorescent Lamp) condition:**

Starting from diastereoisomer **5a**: The *title compound* was purified via column chromatography on silica gel eluting with *n*-pentane/Et<sub>2</sub>O 15:1 (v/v) to afford 67.8 mg (93%) of **6** as a colorless oil.

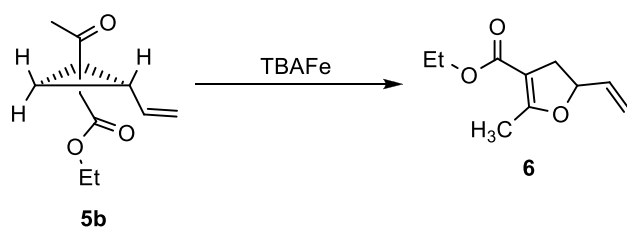

**Thermal condition:**

Starting from diastereoisomer **5b**: The *title compound* was purified via column chromatography on silica gel eluting with *n*-pentane/Et<sub>2</sub>O 15:1 (v/v) to afford 83.9 mg (92%) of **6** as a colorless oil.

**UV-Light (180 W, Hg Lamp) condition:**

Starting from diastereoisomer **5b**: The *title compound* was purified via column chromatography on silica gel eluting with *n*-pentane/Et<sub>2</sub>O 15:1 (v/v) to afford 67.1 mg (92%) of **6** as a colorless oil.

**Visible-Light (23 W, Compact Fluorescent Lamp) condition:**

Starting from diastereoisomer **5b**: The *title compound* was purified via column chromatography on silica gel eluting with *n*-pentane/Et<sub>2</sub>O 15:1 (v/v) to afford 67.1 mg (92%) of **6** as a colorless oil.

$R_f = 0.26$  (*n*-pentane/Et<sub>2</sub>O, 15:1 (v/v)); **<sup>1</sup>H-NMR** (250 MHz, CDCl<sub>3</sub>)  $\delta$  5.93 (ddd,  $J = 17.1, 10.3, 6.6$  Hz, 1H), 5.29 (dt,  $J = 17.1, 1.2$  Hz, 1H), 5.20 (dt,  $J = 10.3, 1.1$  Hz, 1H), 5.08-4.98 (m, 1H), 4.17 (q,  $J = 7$  Hz, 2H), 3.12-3.01 (m, 1H), 2.72-2.62 (m, 1H), 2.21 (t,  $J = 1.5$  Hz, 3H), 1.28 (t,  $J = 7.1$  Hz, 3H) ppm; **<sup>13</sup>C-NMR** (63 MHz, CDCl<sub>3</sub>)  $\delta$  167.5, 166.1, 136.9, 116.6, 101.7, 82.5, 59.5, 35.6, 14.4, 14.1 ppm; **IR** (ATR, neat) 2981, 2928, 2870, 1695, 1642 cm<sup>-1</sup>; **GC/MS** (EI, 70 eV)  $m/z$  (%) 182 (M<sup>+</sup>, 54), 139 (53), 137 (55), 135 (46), 121 (100), 94 (64), 93 (54), 67 (50), 66 (83), 65 (30), 55 (25).

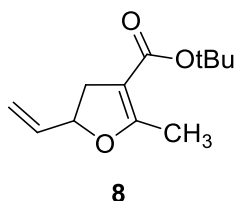

***tert*-Butyl 2-methyl-5-vinyl-4,5-dihydrofuran-3-carboxylate (8):**<sup>[1]</sup>

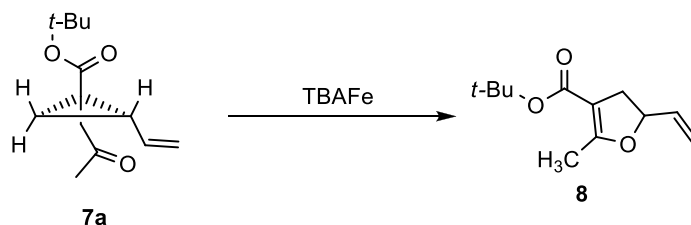

**Thermal condition:**

Starting from diastereoisomer **7a**: The *title compound* was purified via column chromatography on silica gel eluting with *n*-pentane/Et<sub>2</sub>O 15:1 (v/v) to afford 98.7 mg (94%) of **8** as a colorless oil.

**UV-Light (180 W, Hg Lamp) condition:**

Starting from diastereoisomer **7a**: The *title compound* was purified via column chromatography on silica gel eluting with *n*-pentane/Et<sub>2</sub>O 15:1 (v/v) to afford 71.5 mg (85%) of **8** as a colorless oil.

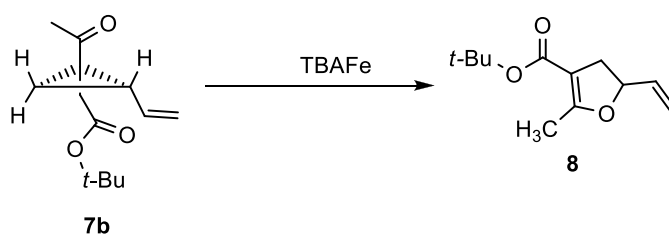

**Thermal condition:**

Starting from diastereoisomer **7b**: The *title compound* was purified via column chromatography on silica gel eluting with *n*-pentane/Et<sub>2</sub>O 15:1 (v/v) to afford 62.9 mg (60%) of **8** as a colorless oil.

**UV-Light (180 W, Hg Lamp) condition:**

Starting from diastereoisomer **7b**: The *title compound* was purified via column chromatography on silica gel eluting with *n*-pentane/Et<sub>2</sub>O 15:1 (v/v) to afford 76.5 mg (91%) of **8** as a colorless oil.

$R_f = 0.37$  (*n*-pentane/Et<sub>2</sub>O, 15:1 (v/v)); **<sup>1</sup>H-NMR** (250 MHz, CDCl<sub>3</sub>)  $\delta$  5.93 (ddd,  $J = 17.0, 10.3, 6.7$  Hz 1H), 5.29 (dt,  $J = 17.2, 1.2$  Hz, 1H), 5.19 (dt,  $J = 10.4, 1.1$  Hz, 1H), 5.04-4.94 (m, 1H), 3.07-2.97



(m, 1H), 2.68-2.58 (m, 1H), 2.17 (t,  $J = 1.6$  Hz, 3H), 1.48 (s, 9H) ppm;  $^{13}\text{C-NMR}$  (63 MHz,  $\text{CDCl}_3$ )  $\delta$  166.2, 165.6, 137.1, 116.5, 103.1, 82.2, 79.5, 35.9, 28.4, 14.1 ppm; **IR** (ATR, neat) 2975, 2928, 2869, 1687, 1645  $\text{cm}^{-1}$ ; **GC/MS** (EI, 70 eV)  $m/z$  (%) 210 ( $\text{M}^+$ , 32), 154 (63), 137 (63), 135 (55), 121 (91), 111 (88), 94 (100), 93 (47), 66 (56), 57 (46).

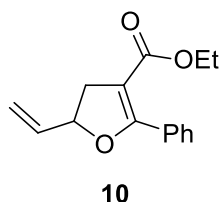

**Ethyl 2-phenyl-5-vinyl-4,5-dihydrofuran-3-carboxylate (**10**):<sup>[8]</sup>**

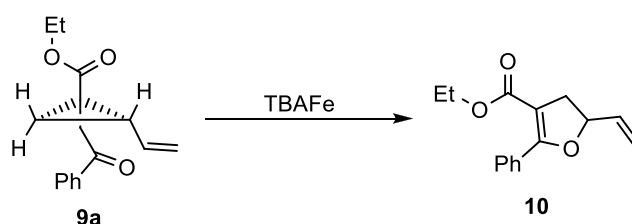

**Thermal condition:**

Starting from diastereoisomer **9a**: 5 mol% TBAFe were used. The *title compound* was purified via column chromatography on silica gel eluting with *n*-pentane/ $\text{Et}_2\text{O}$  10:1 (v/v) to afford 106.4 (87%) of **10** as a colorless oil.

**UV-Light (180 W, Hg Lamp) condition:**

Starting from diastereoisomer **9a**: The *title compound* was purified via column chromatography on silica gel eluting with *n*-pentane/ $\text{Et}_2\text{O}$  10:1 (v/v) to afford 88.9 (91%) of **10** as a colorless oil.

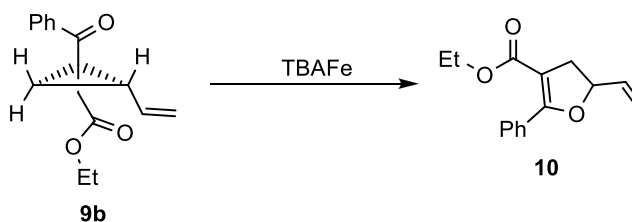

**Thermal condition:**

Starting from diastereoisomer **9b**: The *title compound* was purified via column chromatography on silica gel eluting with *n*-pentane/ $\text{Et}_2\text{O}$  10:1 (v/v) to afford 104.9 mg (86%) of **10** as a colorless oil.

**UV-Light (180 W, Hg Lamp) condition:**

Starting from diastereoisomer **9b**: The *title compound* was purified via column chromatography on silica gel eluting with *n*-pentane/ $\text{Et}_2\text{O}$  10:1 (v/v) to afford 89.9 mg (92%) of **10** as a colorless oil.

$R_f = 0.27$  (*n*-pentane/ $\text{Et}_2\text{O}$ , 10:1 (v/v));  $^1\text{H-NMR}$  (250 MHz,  $\text{CDCl}_3$ )  $\delta$  7.81-7.77 (m, 2H), 7.42-7.33 (m, 3H), 6.03 (ddd,  $J = 6.5, 10.3, 17.1$  Hz, 1H), 5.41-5.12 (m, 3H), 4.13 (q,  $J = 7.2$  Hz, 2H), 3.30 (dd,  $J = 10.6, 15.1$  Hz, 1H), 2.92 (dd,  $J = 8.3, 15.1$  Hz, 1H), 1.20 (t,  $J = 7.2$ , 3H) ppm;  $^{13}\text{C NMR}$  (63 MHz,  $\text{CDCl}_3$ )  $\delta$  165.2, 164.6, 136.8, 130.3, 129.9, 129.3, 127.6, 116.8, 102.1, 82.0, 59.7, 37.3, 14.2 ppm; **IR**

(ATR) 2980, 2867, 1703, 1680, 1623, 1597, 1574, 1493, 1446  $\text{cm}^{-1}$ ; **HRMS (ESI)** calc. for  $[\text{C}_{15}\text{H}_{16}\text{O}_3+\text{Na}^+]$  267.0992, found 267.0994.

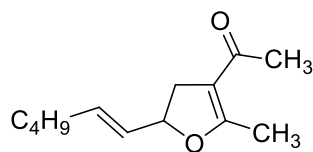

**12**

**(E)-1-(5-(hex-1-en-1-yl)-2-methyl-4,5-dihydrofuran-3-yl)ethan-1-one (12):**

**Thermal condition:**

This reaction was performed using 5 mol-% TBAFe. The *title compound* was purified via column chromatography on silica gel eluting with *n*-pentane/Et<sub>2</sub>O 4:1 (v/v) to afford 90 mg (87%) of **12** as a brown oil.

**UV-Light (180 W, Hg Lamp) condition:**

This reaction was performed by using 5 mol-% TBAFe for 6 hours. The *title compound* was purified via column chromatography on silica gel eluting with *n*-pentane/Et<sub>2</sub>O 4:1 (v/v) to afford 72.5 mg (87%) of **12** as a yellow oil.

$R_f$  = 0.22 (*n*-pentane/Et<sub>2</sub>O, 4:1 (v/v)); **<sup>1</sup>H NMR** (300 MHz, CDCl<sub>3</sub>)  $\delta$  5.76 (m, 1H), 5.61 – 5.51 (m, 1H), 5.00 (dd,  $J$  = 18.0, 8.0 Hz, 1H), 3.09 (m, 1H), 2.71 (m, 1H), 2.22 (t,  $J$  = 1.3 Hz, 3H), 2.19 (s, 3H), 2.07 (dd,  $J$  = 13.6, 6.8 Hz, 2H), 1.44 – 1.27 (m, 4H), 0.90 (t,  $J$  = 7.1 Hz, 3H) ppm; **<sup>13</sup>C NMR** (75 MHz, CDCl<sub>3</sub>)  $\delta$  194.6, 167.4, 135.1, 128.5, 112.1, 83.2, 36.7, 31.8, 30.9, 29.4, 22.2, 15.0, 13.9 ppm; **IR** (ATR) 2957, 2927, 2857, 1671, 1591, 1381, 1216, 1132, 1061, 967, 926, 625  $\text{cm}^{-1}$ ; **GC/MS** (ESI)  $m/z$  (%) 209 ( $M + H^+$ , 25), 167 (16), 149 (18), 123 (25), 113 (100); **HRMS** (ESI) calc. for  $[\text{C}_{13}\text{H}_{20}\text{O}_2 + \text{Na}^+]$  231.1356, found: 231.1358.

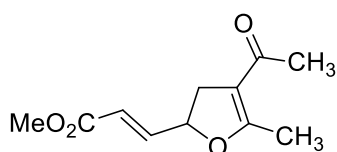

**14**

**Methyl (E)-3-(4-acetyl-5-methyl-2,3-dihydrofuran-2-yl)acrylate (14):**

**Thermal condition:**

This reaction was performed using 5 mol-% TBAFe. The *title compound* was purified via column chromatography on silica gel eluting with *n*-pentane/Et<sub>2</sub>O 4:1 (v/v) to afford 101 mg (96%) of **14** as a red oil.

**UV-Light (180 W, Hg Lamp) condition:**

This reaction was performed by using 5 mol-% TBAFe for 6 hours. The *title compound* was purified via column chromatography on silica gel eluting with *n*-pentane/Et<sub>2</sub>O 4:1 (v/v) to afford 74.8 mg (89%) of **14** as a yellow oil.

$R_f$  = 0.19 (*n*-pentane /Et<sub>2</sub>O, 2:1 (v/v)); <sup>1</sup>H NMR (300 MHz, CDCl<sub>3</sub>) δ 6.93 (dd, *J* = 15.6, 4.8 Hz, 1H), 6.02 (d, *J* = 15.6 Hz, 1H), 5.28 – 5.16 (m, 1H), 3.76 (s, 3H), 3.30 – 3.15 (m, 1H), 2.77 (dd, *J* = 14.0, 7.1 Hz, 1H), 2.26 (s, 3H), 2.21 (s, 3H) ppm; <sup>13</sup>C NMR (75 MHz, CDCl<sub>3</sub>) δ 194.0, 166.8, 166.2, 145.2, 120.8, 111.6, 79.5, 51.7, 36.0, 29.4, 14.7 ppm; IR (ATR) 2953, 2923, 1722, 1673, 1597, 1435, 1389, 1362, 1305, 1272, 1219, 1172, 987, 928, 732, 625 cm<sup>-1</sup>; GC/MS (ESI) *m/z* (%) 211 (*M* + H<sup>+</sup>, 17), 137 (100), 119 (12); HRMS (ESI) calc. for [C<sub>11</sub>H<sub>14</sub>O<sub>4</sub> + H<sup>+</sup>]: 211.0965, found: 211.0961.

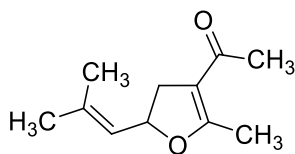

**16**

#### 1-(2-Methyl-5-(2-methylprop-1-en-1-yl)-4,5-dihydrofuran-3-yl)ethan-1-one (**16**):

##### Thermal condition:

The reaction was performed on a 0.275 mmol scale using 5 mol-% TBAFe. The *title compound* was purified via column chromatography on silica gel eluting with *n*-pentane/Et<sub>2</sub>O 4:1 (v/v) to afford 27 mg (54%) of **16** as a purple oil.

##### UV-Light (180 W, Hg Lamp) condition:

This reaction was performed by using 5 mol-% TBAFe for 6 hours. The *title compound* was purified via column chromatography on silica gel eluting with *n*-pentane/Et<sub>2</sub>O 4:1 (v/v) to afford 54.1 mg (75%) of **16** as a colorless oil.

##### Visible-Light (23 W, Compact Fluorescent Lamp) condition:

This reaction was performed by using 5 mol-% TBAFe for 6 hours. The *title compound* was purified via column chromatography on silica gel eluting with *n*-pentane/Et<sub>2</sub>O 4:1 (v/v) to afford 54.8 mg (76%) of **16** as a colorless oil.

$R_f$  = 0.25 (*n*-pentane/Et<sub>2</sub>O, 4:1(v/v)); <sup>1</sup>H NMR (300 MHz, CDCl<sub>3</sub>) δ 5.39 – 5.23 (m, 2H), 3.17 – 3.02 (m, 1H), 2.73 – 2.58 (m, 1H), 2.21 (t, *J* = 1.4 Hz, 3H), 2.19 (s, 3H), 1.78 (s, 3H), 1.74 (s, 3H) ppm; <sup>13</sup>C NMR (75 MHz, CDCl<sub>3</sub>) δ 194.7, 167.9, 138.5, 124.2, 112.1, 79.3, 37.1, 29.4, 25.8, 18.3, 15.2 ppm; IR (ATR) ν 2972, 2916, 2859, 1714, 1669, 1589, 1451, 1380, 1216, 1132, 928, 865, 625 cm<sup>-1</sup>; GC/MS (ESI) *m/z* (%) 181 (*M*<sup>+</sup>, 21), 163 (18), 145 (25), 123 (100), 113 (24), 105 (25); HRMS (ESI) calc. for [C<sub>11</sub>H<sub>16</sub>O<sub>2</sub> + Na<sup>+</sup>]: 203.1043, found: 203.1039.

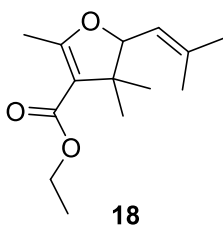

**Ethyl 2,4,4-trimethyl-5-(2-methylprop-1-en-1-yl)-4,5-dihydrofuran-3-carboxylate (18):**

**UV-Light (180 W, Hg Lamp) condition:**

This reaction was performed by using 10 mol-% TBAFe in THF (1 ml) for 24 hours. The *title compound* was purified via column chromatography on silica gel eluting with PE/EA 20:1 (v/v) to afford 93.3 mg (98%) of **18** as a colorless oil.

**UV-Light (75 W, Xenon Lamp) condition:**

This reaction was performed by using 10 mol-% TBAFe in THF (1 ml) for 24 hours. The *title compound* was purified via column chromatography on silica gel eluting with PE/EA 20:1 (v/v) to afford 91.5 mg (96%) of **18** as a colorless oil.

**Visible-Light (23 W, Compact Fluorescent Lamp) condition:**

This reaction was performed by using 10 mol-% TBAFe in THF (1 ml) for 24 hours. The *title compound* was purified via column chromatography on silica gel eluting with PE/EA 20:1 (v/v) to afford 18.1 mg (19%) of **18** as a colorless oil.

$R_f$  = 0.35 (PE/EA 20:1(v/v)); **<sup>1</sup>H-NMR** (300 MHz, CDCl<sub>3</sub>)  $\delta$  5.32 (qd,  $J$  = 1.3, 9.8 Hz, 1H), 4.78 (d,  $J$  = 9.8 Hz, 1H), 4.18 (dq,  $J$  = 1.7, 7.1 Hz, 2H), 2.17 (s, 3H), 1.82 (d,  $J$  = 1.2 Hz, 3H), 1.74 (d,  $J$  = 1.3 Hz, 3H), 1.30 (t,  $J$  = 7.2 Hz, 3H), 1.23 (s, 3H), 1.05 (s, 3H) ppm; **<sup>13</sup>C-NMR** (75 MHz, CDCl<sub>3</sub>)  $\delta$  167.7, 166.1, 139.7, 119.2, 119.9, 88.5, 59.0, 46.2, 26.2, 25.6, 21.8, 18.4, 14.9, 14.3 ppm; **IR** (ATR) 1693, 1628, 1334, 1308, 1253, 1078, 1061, 976, 951, 776 cm<sup>-1</sup>; **HRMS** (ESI) calc. for [C<sub>14</sub>H<sub>22</sub>O<sub>3</sub> + Na<sup>+</sup>]: 261.1461, found: 261.1460.

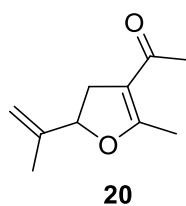

**1-(2-Methyl-5-(prop-1-en-2-yl)-4,5-dihydrofuran-3-yl)ethan-1-one (20)**

**Thermal condition:**

This reaction was performed using 5 mol-% TBAFe. The *title compound* was purified via column chromatography on silica gel eluting with *n*-pentane/Et<sub>2</sub>O 2:1 (v/v) to afford 80 mg (96%) of **20** as a yellow oil.

**UV-Light (180 W, Hg Lamp) condition:**

The *title compound* was purified via column chromatography on silica gel eluting with *n*-pentane/Et<sub>2</sub>O 2:1 (v/v) to afford 64.5 mg (97%) of **20** as a yellow oil.

$R_f$  = 0.46 (*n*-pentane/Et<sub>2</sub>O 2:1 (v/v)); <sup>1</sup>H NMR (300 MHz, CDCl<sub>3</sub>) δ 5.05 – 4.97 (m, 2H), 4.91 – 4.88 (m, 1H), 3.09 (ddq, *J* = 13.5, 10.6, 1.4 Hz, 1H), 2.76 (ddq, *J* = 14.1, 8.4, 1.5 Hz, 1H), 2.25 (t, *J* = 1.5 Hz, 3H), 2.21 (s, 3H), 1.74 (s, 3H) ppm; <sup>13</sup>C NMR (75 MHz, CDCl<sub>3</sub>) δ 194.4, 167.6, 143.3, 112.1, 112.0, 84.8, 35.3, 29.4, 17.0, 14.9 ppm; IR (Film) 2918, 2865, 1672, 1598, 1389, 1219 cm<sup>-1</sup>; GC/MS (EI, 70 eV) *m/z* (%) = 166 (30) [M<sup>+</sup>], 123 (37), 43 (100) HRMS (EI) calc. for [C<sub>10</sub>H<sub>14</sub>O<sub>2</sub>]: 166.0994, found: 166.0995.

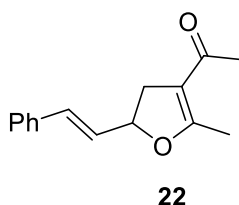

**(*E*)-1-(2-Methyl-5-styryl-4,5-dihydrofuran-3-yl)ethan-1-one (22)**

**Thermal condition:**

This reaction was performed on a 0.25 mmol scale using 5 mol-% TBAFe. The *title compound* was purified via column chromatography on silica gel eluting with *n*-pentane/Et<sub>2</sub>O 2:1 (v/v) to afford 56 mg (98%) of **22** as a brown oil.

**UV-Light (180 W, Hg Lamp) condition:**

This reaction was performed by using 5 mol-% TBAFe for 6 hours. The *title compound* was purified via column chromatography on silica gel eluting with *n*-pentane/Et<sub>2</sub>O 2:1 (v/v) to afford 89.5 mg (98%) of **22** as a brown oil.

$R_f$  = 0.25 (*n*-pentane/Et<sub>2</sub>O, 4:1(v/v)); <sup>1</sup>H NMR (300 MHz, CDCl<sub>3</sub>) δ 7.43 – 7.23 (m, 5H), 6.62 (d, *J* = 15.8 Hz, 1H), 6.26 (dd, *J* = 15.8, 7.3 Hz, 1H), 5.26 – 5.15 (m, 1H), 3.19 (m, 1H), 2.83 (m, 1H), 2.26 (t, *J* = 1.4 Hz, 3H), 2.21 (s, 3H) ppm; <sup>13</sup>C NMR (75 MHz, CDCl<sub>3</sub>) δ 194.46, 167.39, 135.97, 132.57, 128.66, 128.22, 127.63, 126.71, 112.09, 82.74, 36.76, 29.48, 15.08 ppm; IR (Film) 2922, 2863, 1669, 1592, 1494, 1449, 1423, 1219 cm<sup>-1</sup>; HRMS (ESI) calc. for [C<sub>15</sub>H<sub>16</sub>O<sub>2</sub> + Na<sup>+</sup>] 251.1043, found: 251.1040.

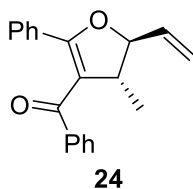

**(4-Methyl-2-phenyl-5-vinyl-4,5-dihydrofuran-3-yl)(phenyl)methanone (24):<sup>[1]</sup>**

**Thermal condition:**

The *title compound* was purified via column chromatography on silica gel eluting with PE/EA 20:1 (v/v) to afford 52 mg (72%) of **24** as a colorless oil.

**UV-Light (180 W, Hg Lamp) condition:**

The *title compound* was purified via column chromatography on silica gel eluting with PE/EA 20:1 (v/v) to afford 106.7 mg (92%) of **24** as a colorless oil.

$R_f$  = 0.33 (PE/EA, 20:1 (v/v)); **<sup>1</sup>H-NMR** (300 MHz, CDCl<sub>3</sub>)  $\delta$  7.56-7.47 (m, 2H), 7.27-7.19 (m, 3H), 7.19-7.12 (m, 1H), 7.12-7.00 (m, 4H), 6.07 (ddd,  $J$  = 6.8, 10.4, 17.1 Hz, 1H), 5.44 (td,  $J$  = 1.2, 17.2 Hz, 1H), 5.30 (td,  $J$  = 1.0, 10.4 Hz, 1H), 4.77- 4.69 (m, 1H), 3.58-3.46 (m, 1H), 1.36 (d,  $J$  = 6.6 Hz, 3H) ppm; **<sup>13</sup>C-NMR** (75 MHz, CDCl<sub>3</sub>)  $\delta$  193.8, 164.3, 139.2, 135.9, 131.4, 130.03, 129.97, 129.4, 129.0, 127.7, 127.6, 117.5, 116.8, 90.2, 46.5, 17.9 ppm; **IR** (ATR) 3061, 2958, 1721, 1613, 1593, 1572, 1490, 1447, 1158, 889, 729, 692 cm<sup>-1</sup>; **HRMS** (ESI) calc. for [C<sub>20</sub>H<sub>18</sub>O<sub>2</sub> + Na<sup>+</sup>]: 313.1199, found: 313.1193.

## 9. NBu<sub>4</sub>[Fe(CO)<sub>3</sub>(NO)] (TBAFe)-catalyzed Cloke-Wilson Rearrangement of Arylcyclopropanes

**Table 1. Optimization of Cloke-Wilson Rearrangement of Arylcyclopropanes under Thermal/Microwave Condition.**

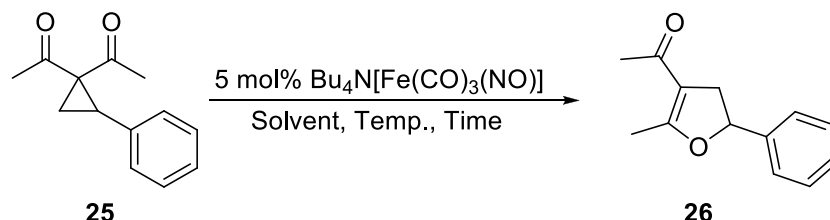

| Entry <sup>[a]</sup> | Solvent                         | Temp./heating method | Time   | Conversion <sup>[b]</sup> |
|----------------------|---------------------------------|----------------------|--------|---------------------------|
| 1                    | CH <sub>2</sub> Cl <sub>2</sub> | 45 °C (oil bath)     | 14 h   | < 5%                      |
| 2                    | THF                             | 120 °C (oil bath)    | 14.5 h | < 5%                      |
| 3                    | THF                             | 120 °C (MW)          | 1 h    | < 5%                      |
| 4                    | PhMe                            | 120 °C (MW)          | 1 h    | < 5%                      |
| 5                    | CH <sub>3</sub> CN              | 120 °C (MW)          | 1 h    | 8%                        |
| 6                    | <i>n</i> -Pentane               | 120 °C (MW)          | 1 h    | 11%                       |
| 7                    | DMF                             | 120 °C (MW)          | 1 h    | 66%                       |
| 8                    | DMF                             | 120 °C (MW)          | 1 h    | < 5%                      |
| 10                   | DMF                             | 120 °C (oil bath)    | 1 h    | 16%                       |
| 11                   | DMF                             | 120 °C (MW)          | 2 h    | 79%                       |

[a] Reaction were performed on a 0.25 mmol scale in absolute solvents. [b] Determined via GC-intergration.

**Table 2. Optimization of Cloke-Wilson Rearrangement of Arylcyclopropanes under UV-Light Condition.**

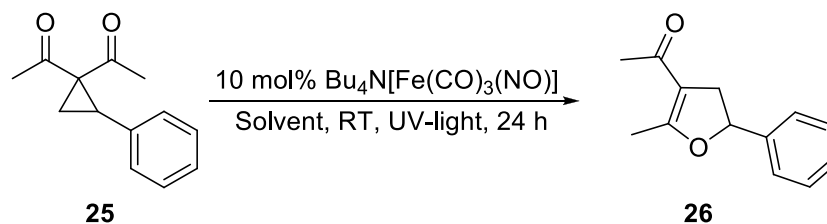

| Entry <sup>[a]</sup> | Solvent                         | Yield <sup>[b]</sup> |
|----------------------|---------------------------------|----------------------|
| 1                    | DMF                             | 82                   |
| 2                    | MeOH                            | -                    |
| 3                    | CH <sub>3</sub> CN              | -                    |
| 4                    | CH <sub>2</sub> Cl <sub>2</sub> | -                    |
| 5                    | THF                             | -                    |
| 6                    | <i>n</i> -Pentane               | -                    |

[a] 0.4 mmol substrate, 10 mol% TBA[Fe], 1 mL solvent, 180 W Hg-lamp, 20 °C, 24 h. [b] Isolated yield.

#### **General procedure V: Microwave conditions for the CWR of ACPs**

TBAFe (5.2 mg, 0.0125 mmol, 0.05 equiv.) and the corresponding ACP (0.25 mmol, 1 equiv.) were weighed into a dried 10 mL microwave tube. Anhydrous DMF (1 mL) was added and the tube was sealed under an atmosphere of dry nitrogen. The reaction mixture was stirred for 2 h at 120 °C under microwave conditions. The product was obtained via chromatography on silica gel.

#### **General procedure VI: UV-Light conditions for the CWR of ACPs**

A 10-mL Schlenk tube was charged with Arylcyclopropane (0.40 mmol, 1 equiv.), TBAFe (0.04 mmol, 0.1 equiv.), and DMF (1 mL) under N<sub>2</sub>. The reactions were carried out at room temperature under irradiation of UV light (180 W, Hg lamp or 75 W, Xe lamp at distance of 15 cm) or Visible light (23 W, Compact Fluorescent Lamp at distance of 15 cm) for 24 h. The reaction was quenched with diethyl ether and concentrated *in vacuo*. Purification by silica column chromatography afforded the desired dihydrofuran product.

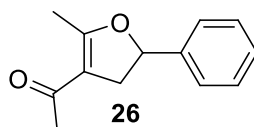

#### **1-(2-Methyl-5-phenyl-4,5-dihydrofuran-3-yl)ethan-1-one (26)<sup>[9]</sup>**

##### **Thermal condition:**

The *title compound* was purified by column chromatography on silica gel eluting with *n*-pentane/Et<sub>2</sub>O 2:1 (v/v) to afford 50 mg (99%) of **26** as a colorless oil.

##### **UV-Light (180 W, Hg Lamp) condition:**

The *title compound* was purified by column chromatography on silica gel eluting with *n*-pentane/Et<sub>2</sub>O 2:1 (v/v) to afford 66.3 mg (82%) of **26** as a colorless oil.

**UV-Light (75 W, Xenon Lamp) condition:**

The *title compound* was purified by column chromatography on silica gel eluting with *n*-pentane/Et<sub>2</sub>O 2:1 (v/v) to afford 46.1 mg (57%) of **26** as a colorless oil.

**Visible-Light (23 W, Compact Fluorescent Lamp) condition:**

The *title compound* was purified by column chromatography on silica gel eluting with *n*-pentane/Et<sub>2</sub>O 2:1 (v/v) to afford 4.0 mg (5%) of **26** as a colorless oil.

$R_f$  = 0.46 (*n*-Pentane/Et<sub>2</sub>O, 2:1 (v/v)); <sup>1</sup>H NMR (300 MHz, CDCl<sub>3</sub>) δ 7.41-7.29 (m, 5H), 5.60 (dd,  $J$  = 8.4, 10.6 Hz, 1H), 3.40 (qdd,  $J$  = 1.5, 10.7, 14.3 Hz, 1H), 2.97 (qdd,  $J$  = 1.5, 8.4, 14.2 Hz, 1H), 2.31 (t,  $J$  = 1.5 Hz, 3H), 2.22 (s, 3H) ppm; <sup>13</sup>C NMR (75 MHz, CDCl<sub>3</sub>) δ 194.4, 167.4, 141.2, 128.7, 128.2, 125.6, 111.8, 83.1, 38.7, 29.4, 15.0 ppm; IR (ATR) 3063, 3032, 3002, 2954, 2919, 2865, 1670, 1595, 1495, 1452, 1423 cm<sup>-1</sup>; HRMS (ESI): calc. for [C<sub>13</sub>H<sub>14</sub>O<sub>2</sub> + Na<sup>+</sup>]: 225.0886, found: 225.0892.

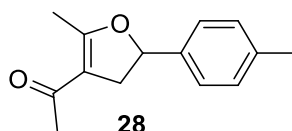

**1-(2-Methyl-5-(p-tolyl)-4,5-dihydrofuran-3-yl)ethan-1-one (28)<sup>[9]</sup>**

**Thermal condition:**

The *title compound* was purified by column chromatography on silica gel eluting with *n*-pentane/Et<sub>2</sub>O 3:1 (v/v) to afford 54 mg (99%) of **28** as a yellow oil.

**UV-Light (180 W, Hg Lamp) condition:**

The *title compound* was purified by column chromatography on silica gel eluting with *n*-pentane/Et<sub>2</sub>O 3:1 (v/v) to afford 73.5 mg (85%) of **28** as a colorless oil.

$R_f$  = 0.21 (*n*-pentane/Et<sub>2</sub>O, 3:1 (v/v)); <sup>1</sup>H NMR (300 MHz, CDCl<sub>3</sub>) δ 7.25 – 7.15 (m, 4H), 5.56 (dd,  $J$  = 10.6, 8.4 Hz, 1H), 3.36 (m, 1H), 2.96 (m, 1H), 2.35 (s, 3H), 2.30 (t,  $J$  = 1.5 Hz, 3H), 2.21 (s, 3H) ppm; <sup>13</sup>C NMR (75 MHz, CDCl<sub>3</sub>) δ 194.5, 167.5, 138.3, 138.1, 129.4, 125.7, 111.9, 83.3, 38.7, 29.5, 21.2, 15.0 ppm; IR (Film) 2921 (w), 2864 (w), 1670 (m), 1592 (s), 1516 (m), 1423 (m), 1381 (m), 1359 (m) cm<sup>-1</sup>; GC/MS (ESI)  $m/z$  (%) = 239 (100) [M<sup>+</sup> + Na]; HRMS (ESI) calc. for [C<sub>14</sub>H<sub>16</sub>O<sub>2</sub> + Na<sup>+</sup>]: 239.1043, found: 239.1033.

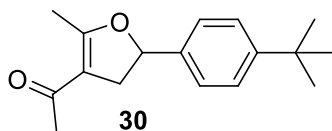

**1-(5-(4-(tert-Butyl)phenyl)-2-methyl-4,5-dihydrofuran-3-yl)ethan-1-one (30)<sup>[5]</sup>**

**Thermal condition:**



The *title compound* was purified by column chromatography on silica gel eluting with *n*-pentane/Et<sub>2</sub>O 3:1 (v/v) to afford 48 mg (75%) of **30** as a yellow oil.

**UV-Light (180 W, Hg Lamp) condition:**

The *title compound* was purified by column chromatography on silica gel eluting with *n*-pentane/Et<sub>2</sub>O 3:1 (v/v) to afford 79.6 mg (77%) of **30** as a yellow oil.

$R_f$  = 0.31 (*n*-pentane/Et<sub>2</sub>O, 3:1 (v/v)); <sup>1</sup>H NMR (300 MHz, CDCl<sub>3</sub>) δ 7.43 – 7.38 (m, 2H), 7.27 (dt,  $J$  = 2.0, 1.2 Hz, 2H), 5.57 (dd,  $J$  = 10.6, 8.4 Hz, 1H), 3.37 (m, 1H), 3.00 (m, 1H), 2.30 (t,  $J$  = 1.5 Hz, 3H), 2.21 (s, 3H), 1.32 (s, 9H) ppm; <sup>13</sup>C NMR (75 MHz, CDCl<sub>3</sub>) δ 194.5, 167.5, 151.4, 138.2, 125.7, 125.6, 111.9, 83.2, 38.5, 34.6, 31.3, 29.5, 15.0 ppm; IR (Film) 2959 (m), 2867 (w), 1671 (m), 1595 (s), 1512 (w), 1382 (m) cm<sup>-1</sup>; GC/MS (EI, 70 eV)  $m/z$  (%) = 258 (100) [M<sup>+</sup>], 243 (69), 169 (25), 57 (25), 43 (57); HRMS (EI) calc. for [C<sub>17</sub>H<sub>22</sub>O<sub>2</sub>]: 258.1620, found: 258.1622.

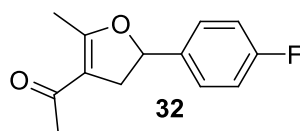

**1-(5-(4-Fluorophenyl)-2-methyl-4,5-dihydrofuran-3-yl)ethan-1-one (32)**<sup>[10]</sup>

**Thermal condition:**

The *title compound* was purified by column chromatography on silica gel eluting with *n*-pentane/Et<sub>2</sub>O 3:1 (v/v) to afford 42 mg (76%) of **32** as a yellow oil.

**UV-Light (180 W, Hg Lamp) condition:**

The *title compound* was purified by column chromatography on silica gel eluting with *n*-pentane/Et<sub>2</sub>O 3:1 (v/v) to afford 54.6 mg (62%) of **32** as a yellow oil.

$R_f$  = 0.21 (*n*-pentane/Et<sub>2</sub>O, 3:1 (v/v)); <sup>1</sup>H-NMR (300 MHz, CDCl<sub>3</sub>) δ 7.36-7.26 (m, 2H), 7.12-7.01 (m, 2H), 5.57 (dd,  $J$  = 8.4, 10.4 Hz, 1H), 3.46-3.32 (m, 1H), 3.00-2.88 (m, 1H), 2.30 (t,  $J$  = 1.4 Hz, 3H), 2.22 (s, 3H) ppm; <sup>13</sup>C-NMR (75 MHz, CDCl<sub>3</sub>) δ 194.3, 167.2, 162.5 (d,  $J$  = 245.5 Hz), 137.1 (d,  $J$  = 3.2 Hz), 127.5 (d,  $J$  = 8.2 Hz), 115.6 (d,  $J$  = 21.2 Hz), 111.9, 82.5, 38.8, 29.5, 15.0 ppm; IR (ATR) 2924, 1671, 1593, 1510, 1424, 1216, 929, 833, 624. 611 cm<sup>-1</sup>; HRMS (ESI) calc. for [C<sub>13</sub>H<sub>13</sub>FO<sub>2</sub> + Na<sup>+</sup>]: 243.0792, found: 243.0785.

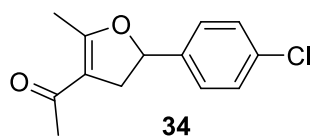

**1-(5-(4-Chlorophenyl)-2-methyl-4,5-dihydrofuran-3-yl)ethan-1-one (34)**<sup>[9]</sup>

**Thermal condition:**

The *title compound* was purified by column chromatography on silica gel eluting with *n*-pentane/Et<sub>2</sub>O 3:1 (v/v) to afford 54 mg (92%) of **34** as a yellow oil.

**UV-Light (180 W, Hg Lamp) condition:**

The *title compound* was purified by column chromatography on silica gel eluting with *n*-pentane/Et<sub>2</sub>O 3:1 (v/v) to afford 71.3 mg (75%) of **34** as a yellow oil.

$R_f$  = 0.18 (*n*-pentane/Et<sub>2</sub>O, 3:1 (v/v)); **<sup>1</sup>H-NMR** (300 MHz, CDCl<sub>3</sub>)  $\delta$  7.39-7.32 (m, 2H), 7.30-7.22 (m, 2H), 5.56 (dd,  $J$  = 8.3, 10.7 Hz, 1H), 3.48-3.33 (m, 1H), 2.97-2.86 (m, 1H), 2.30 (t,  $J$  = 1.5 Hz, 3H), 2.21 (s, 3H) ppm; **<sup>13</sup>C-NMR** (75 MHz, CDCl<sub>3</sub>)  $\delta$  194.3, 167.2, 139.8, 134.0, 128.9, 127.0, 111.9, 82.3, 38.8, 29.5, 15.0 ppm; **IR** (ATR) 2921, 1672, 1592, 1492, 1381, 1215, 1134, 930, 624 cm<sup>-1</sup>; **HRMS** (ESI) calc. for [C<sub>13</sub>H<sub>13</sub>ClO<sub>2</sub> + Na<sup>+</sup>]: 259.0496, found: 259.0484.

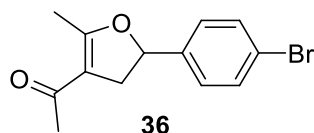

### 1-(5-(4-Bromophenyl)-2-methyl-4,5-dihydrofuran-3-yl)ethan-1-one (**36**)<sup>[10]</sup>

#### Thermal condition:

The *title compound* was purified by column chromatography on silica gel eluting with *n*-pentane/Et<sub>2</sub>O 3:1 (v/v) to afford 68 mg (97%) of **36** as a yellow oil.

$R_f$  = 0.22 (*n*-pentane/Et<sub>2</sub>O, 3:1 (v/v)); **<sup>1</sup>H NMR** (300 MHz, CDCl<sub>3</sub>)  $\delta$  7.54 – 7.48 (m, 2H), 7.24 – 7.17 (m, 2H), 5.55 (dd,  $J$  = 10.7, 8.3 Hz, 1H), 3.39 (m, 1H), 2.91 (m, 1H), 2.31 (t,  $J$  = 1.5 Hz, 3H), 2.22 (s, 3H) ppm; **<sup>13</sup>C NMR** (75 MHz, CDCl<sub>3</sub>)  $\delta$  194.3, 167.2, 140.4, 131.9, 127.3, 122.1, 111.9, 82.4, 38.7, 29.5, 15.0 ppm; **IR** (Film) 2922 (w), 2866 (w), 1671 (m), 1601 (s), 1488 (m), 1382 (m) cm<sup>-1</sup>; **GC/MS** (EI, 70 eV)  $m/z$  (%) = 280 (63) [M<sup>+</sup>], 186 (28), 115 (23), 14,5 (100); **HRMS** (EI) calc. for [C<sub>13</sub>H<sub>13</sub>BrO<sub>2</sub>]: 280.0099, found: 280.0097.

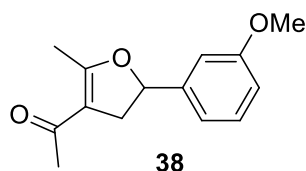

### 1-(5-(3-Methoxyphenyl)-2-methyl-4,5-dihydrofuran-3-yl)ethan-1-one (**38**)

#### Thermal condition:

The *title compound* was purified by column chromatography on silica gel eluting with *n*-pentane/Et<sub>2</sub>O 2:1 (v/v) to afford 49 mg (85%) of **38** as a yellow oil.

#### UV-Light (180 W, Hg Lamp) condition:

The *title compound* was purified by column chromatography on silica gel eluting with *n*-pentane/Et<sub>2</sub>O 2:1 (v/v) to afford 86.4 mg (93%) of **38** as a yellow oil.

$R_f$  = 0.27 (*n*-pentane/Et<sub>2</sub>O, 2:1 (v/v)); **<sup>1</sup>H-NMR** (300 MHz, CDCl<sub>3</sub>)  $\delta$  7.34-7.26 (m, 3H), 6.94-6.82 (m, 1H), 5.56 (dd,  $J$  = 8.4, 10.7 Hz, 1H), 3.82 (s, 3H), 3.45-3.32 (m, 1H), 3.03-2.90 (m, 1H), 2.31 (t,  $J$  = 1.5 Hz, 3H), 2.21 (s, 3H) ppm; **<sup>13</sup>C-NMR** (75 MHz, CDCl<sub>3</sub>)  $\delta$  194.4, 167.4, 159.9, 142.9, 129.9, 117.8, 113.4, 111.9, 111.3, 83.0, 55.3, 38.8, 29.5, 15.0 ppm; **IR** (ATR) 2938, 2837, 1670, 1586, 1489, 1383,

1259, 1216, 926, 782, 697, 625  $\text{cm}^{-1}$ ; **HRMS** (ESI) calc. for  $[\text{C}_{14}\text{H}_{16}\text{O}_3 + \text{Na}^+]$ : 255.0992, found: 255.0974.

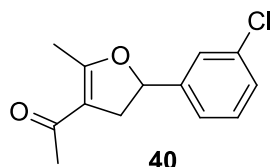

**1-(5-(3-Chlorophenyl)-2-methyl-4,5-dihydrofuran-3-yl)ethan-1-one (40)<sup>[9]</sup>**

**Thermal condition:**

The *title compound* was purified by column chromatography on silica gel eluting with *n*-pentane/Et<sub>2</sub>O 2:1 (v/v) to afford 53 mg (90%) of **40** as a yellow oil.

**UV-Light (180 W, Hg Lamp) condition:**

The *title compound* was purified by column chromatography on silica gel eluting with *n*-pentane/Et<sub>2</sub>O 2:1 (v/v) to afford 68.1 mg (72%) of **40** as a yellow oil.

$R_f$  = 0.32 (*n*-pentane/Et<sub>2</sub>O, 2:1 (v/v)); **<sup>1</sup>H-NMR** (300 MHz, CDCl<sub>3</sub>)  $\delta$  7.35-7.27 (m, 3H), 7.24-7.15 (m, 1H), 5.56 (dd,  $J$  = 8.3, 10.7 Hz, 1H), 3.47-3.35 (m, 1H), 2.99-2.87 (m, 1H), 2.32 (t,  $J$  = 1.5 Hz, 3H), 2.22 (s, 3H) ppm; **<sup>13</sup>C-NMR** (75 MHz, CDCl<sub>3</sub>)  $\delta$  194.3, 167.2, 143.4, 134.7, 130.1, 128.3, 125.7, 123.7, 111.9, 82.2, 38.8, 29.5, 15.0 ppm; **IR** (ATR) 2998, 2922, 1672, 1593, 1383, 1360, 1215, 923, 785, 693, 624  $\text{cm}^{-1}$ ; **HRMS** (ESI) calc. for  $[\text{C}_{13}\text{H}_{13}\text{ClO}_2 + \text{Na}^+]$ : 259.0496, found: 259.0492.

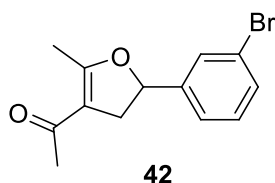

**1-(5-(3-Bromophenyl)-2-methyl-4,5-dihydrofuran-3-yl)ethan-1-one (42)**

**Thermal condition:**

The *title compound* was purified by column chromatography on silica gel eluting with *n*-pentane/Et<sub>2</sub>O 2:1 (v/v) to afford 59 mg (84%) of **42** as a yellow oil.

$R_f$  = 0.29 (*n*-pentane/Et<sub>2</sub>O, 2:1 (v/v)); **<sup>1</sup>H NMR** (300 MHz, CDCl<sub>3</sub>)  $\delta$  7.48 – 7.43 (m, 2H), 7.26 – 7.23 (m, 2H), 5.55 (dd,  $J$  = 10.7, 8.3 Hz, 1H), 3.40 (m, 1H), 2.93 (m, 1H), 2.32 (t,  $J$  = 1.5 Hz, 3H), 2.22 (s, 3H) ppm; **<sup>13</sup>C NMR** (75 MHz, CDCl<sub>3</sub>)  $\delta$  194.3, 167.2, 143.7, 131.3, 130.4, 128.6, 124.2, 122.8, 111.9, 82.1, 38.8, 29.5, 14.9 ppm; **IR** (Film) 2922 (w), 2865 (w), 1672 (m), 1595 (s), 1475 (w), 1424 (m), 1385 (m)  $\text{cm}^{-1}$ ; **GC/MS** (ESI)  $m/z$  (%) = 303 (100) [ $\text{M}^+ + \text{Na}$ ]; **HRMS** (ESI) calc. for  $[\text{C}_{13}\text{H}_{13}\text{BrO}_2 + \text{Na}^+]$ : 302.9991, found: 302.9969.

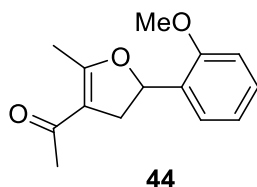

**1-(5-(2-Methoxyphenyl)-2-methyl-4,5-dihydrofuran-3-yl)ethan-1-one (44)**

**Thermal condition:**

The *title compound* was purified by column chromatography on silica gel eluting with *n*-pentane/Et<sub>2</sub>O 2:1 (v/v) to afford 48 mg (83%) of **44** as a yellow oil.

**UV-Light (180 W, Hg Lamp) condition:**

The *title compound* was purified by column chromatography on silica gel eluting with *n*-pentane/Et<sub>2</sub>O 2:1 (v/v) to afford 38.1 mg (41%) of **44** as a yellow oil.

$R_f$  = 0.44 (*n*-pentane/Et<sub>2</sub>O, 2:1 (v/v)); <sup>1</sup>H NMR (300 MHz, CDCl<sub>3</sub>) δ 7.32 – 7.25 (m, 2H), 6.97 (m, 1H), 6.90 (m, 1H), 5.87 (dd,  $J$  = 10.7, 8.0 Hz, 1H), 3.84 (s, 3H), 3.42 (m, 1H), 2.79 (m, 1H), 2.34 (t,  $J$  = 1.5 Hz, 3H), 2.18 (s, 3H) ppm; <sup>13</sup>C NMR (75 MHz, CDCl<sub>3</sub>) δ 194.8, 167.5, 155.9, 129.9, 128.9, 125.3, 120.6, 111.9, 110.4, 78.8, 55.4, 38.2, 29.5, 15.0 ppm; IR (Film) 2938 (w), 2838 (w), 1670 (m), 1588 (s), 1492 (m), 1462 (m), 1437 (m) cm<sup>-1</sup>; GC/MS (ESI)  $m/z$  (%) = 255 (100) [M<sup>+</sup> + Na]; HRMS (ESI) calc. for [C<sub>14</sub>H<sub>16</sub>O<sub>3</sub> + Na<sup>+</sup>]: 255.0992, found: 255.0978.

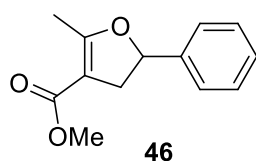

**Methyl 2-methyl-5-phenyl-4,5-dihydrofuran-3-carboxylate (46)<sup>[9]</sup>**

**Thermal condition:**

The *title compound* was purified by column chromatography on silica gel eluting with *n*-pentane/Et<sub>2</sub>O 2:1 (v/v) to afford 40 mg (74%) of **46** as a colorless oil.

**UV-Light (180 W, Hg Lamp) condition:**

The *title compound* was purified by column chromatography on silica gel eluting with *n*-pentane/Et<sub>2</sub>O 2:1 (v/v) to afford 70.7 mg (81%) of **46** as a colorless oil.

$R_f$  = 0.27 (*n*-pentane/Et<sub>2</sub>O, 10:1 (v/v)); <sup>1</sup>H-NMR (300 MHz, CDCl<sub>3</sub>) δ 7.41-7.27 (m, 5H), 5.59 (dd,  $J$  = 8.3, 10.7 Hz, 1H), 3.71 (s, 3H), 3.33 (qdd,  $J$  = 1.6, 10.8, 14.5 Hz, 1H), 2.91 (qdd,  $J$  = 1.6, 8.3, 14.5 Hz, 1H), 2.29 (t,  $J$  = 1.6 Hz, 3H) ppm; <sup>13</sup>C-NMR (75 MHz, CDCl<sub>3</sub>) δ 168.0, 166.4, 141.5, 128.7, 128.2, 125.7, 101.4, 83.2, 50.9, 37.9, 14.1 ppm; IR (ATR) 3032, 2949, 1690, 1647, 1495, 1435 cm<sup>-1</sup>; HRMS (ESI): calc. for [C<sub>13</sub>H<sub>14</sub>O<sub>3</sub> + Na<sup>+</sup>]: 241.0835, found: 241.0832.

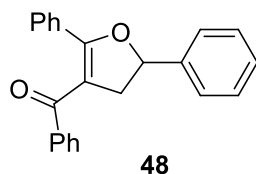

**(2,5-Diphenyl-4,5-dihydrofuran-3-yl)(phenyl)methanone (48)<sup>[11]</sup>**

**Thermal condition:**

The *title compound* was purified by column chromatography on silica gel eluting with *n*-pentane/Et<sub>2</sub>O 5:1 (v/v) to afford 76 mg (93%) of **48** as a colorless solid.

**UV-Light (180 W, Hg Lamp) condition:**

The *title compound* was purified by column chromatography on silica gel eluting with *n*-pentane/Et<sub>2</sub>O 5:1 (v/v) to afford 52.2 mg (40%) of **48** as a colorless solid.

$R_f$  = 0.33 (*n*-pentane/Et<sub>2</sub>O, 5:1 (v/v)); Mp. 111-112 °C; <sup>1</sup>H-NMR (250 MHz, CDCl<sub>3</sub>) δ 7.51-7.05 (m, 15H), 5.85 (bt,  $J$  = 9.5 Hz, 1H), 3.71 (dd,  $J$  = 10.3, 15.1 Hz, 1H), 3.39 (dd,  $J$  = 9.0, 15.1 Hz, 1H) ppm; <sup>13</sup>C-NMR (63 MHz, CDCl<sub>3</sub>) 193.4, 165.5, 141.1, 139.0, 131.2, 130.1, 129.9, 129.5, 128.9, 128.8, 128.3, 127.7, 127.6, 125.9, 111.8, 83.2, 41.1 ppm; **IR** (ATR) 3061, 3030, 1611, 1592, 1573, 1492, 1446 cm<sup>-1</sup>; **HRMS** (ESI): calc. for [C<sub>23</sub>H<sub>18</sub>O<sub>2</sub> + Na<sup>+</sup>]: 349.1199, found: 349.1215.

## 10. $^1\text{H}$ and $^{13}\text{C}$ -NMR Spectra

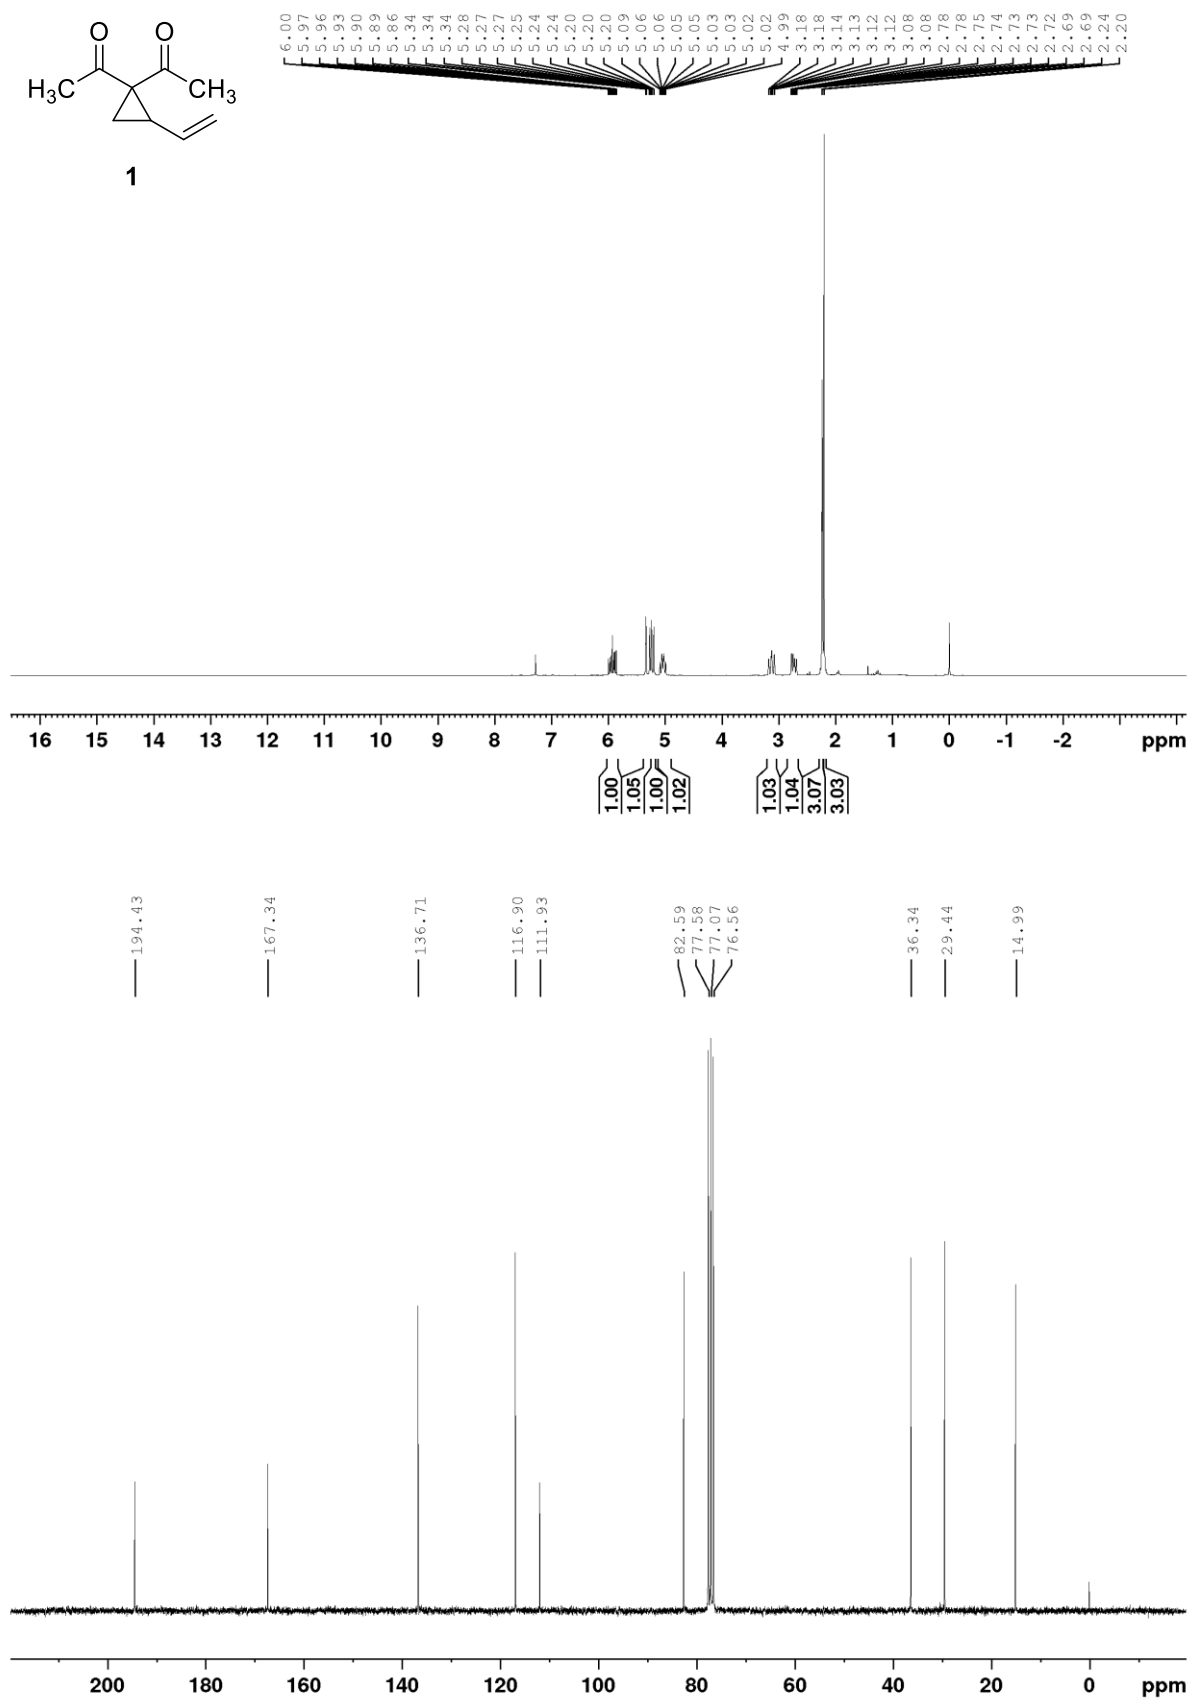

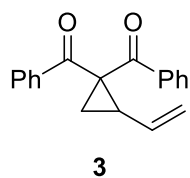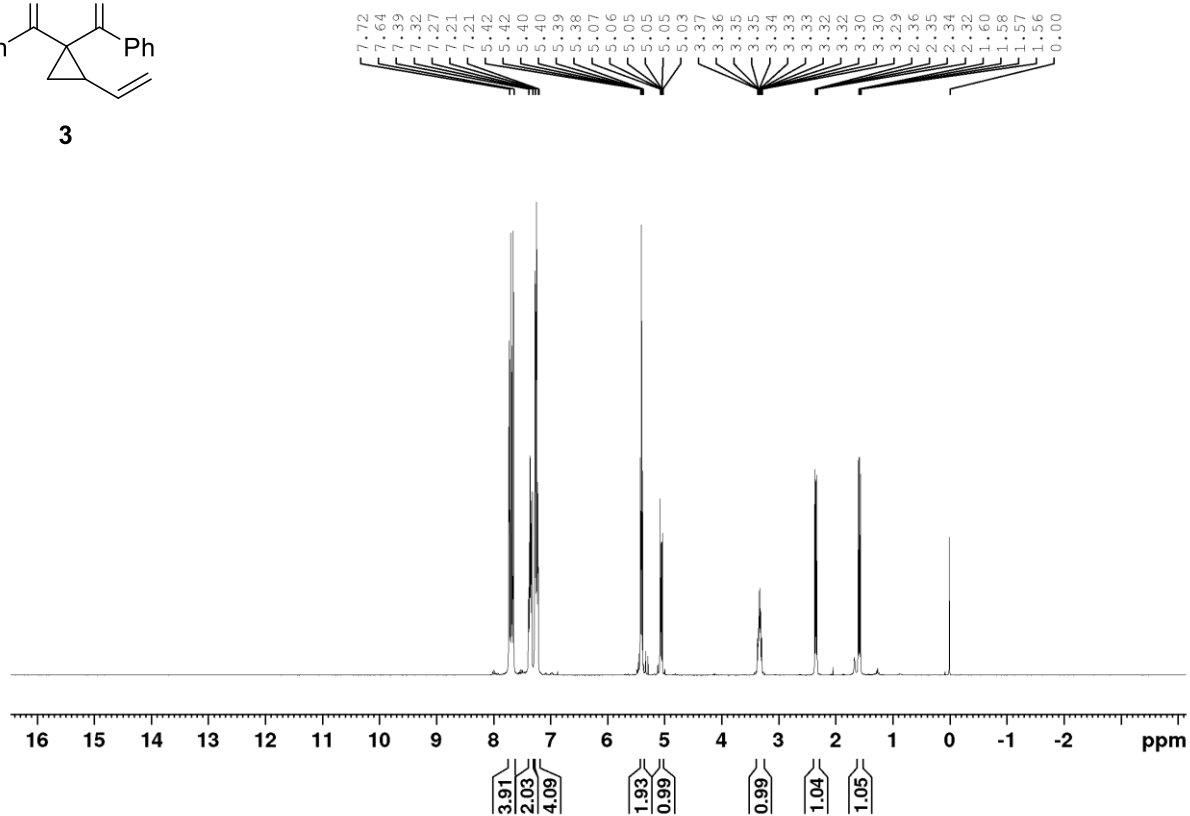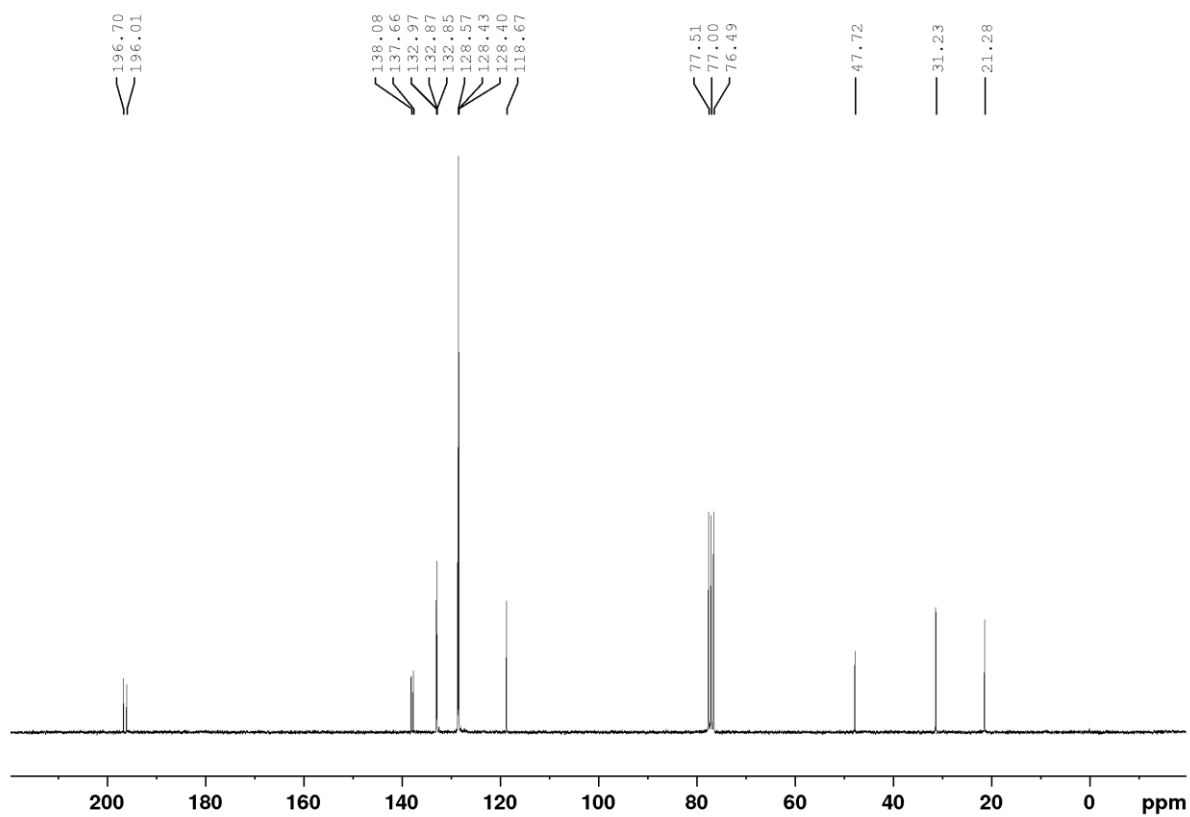

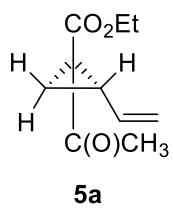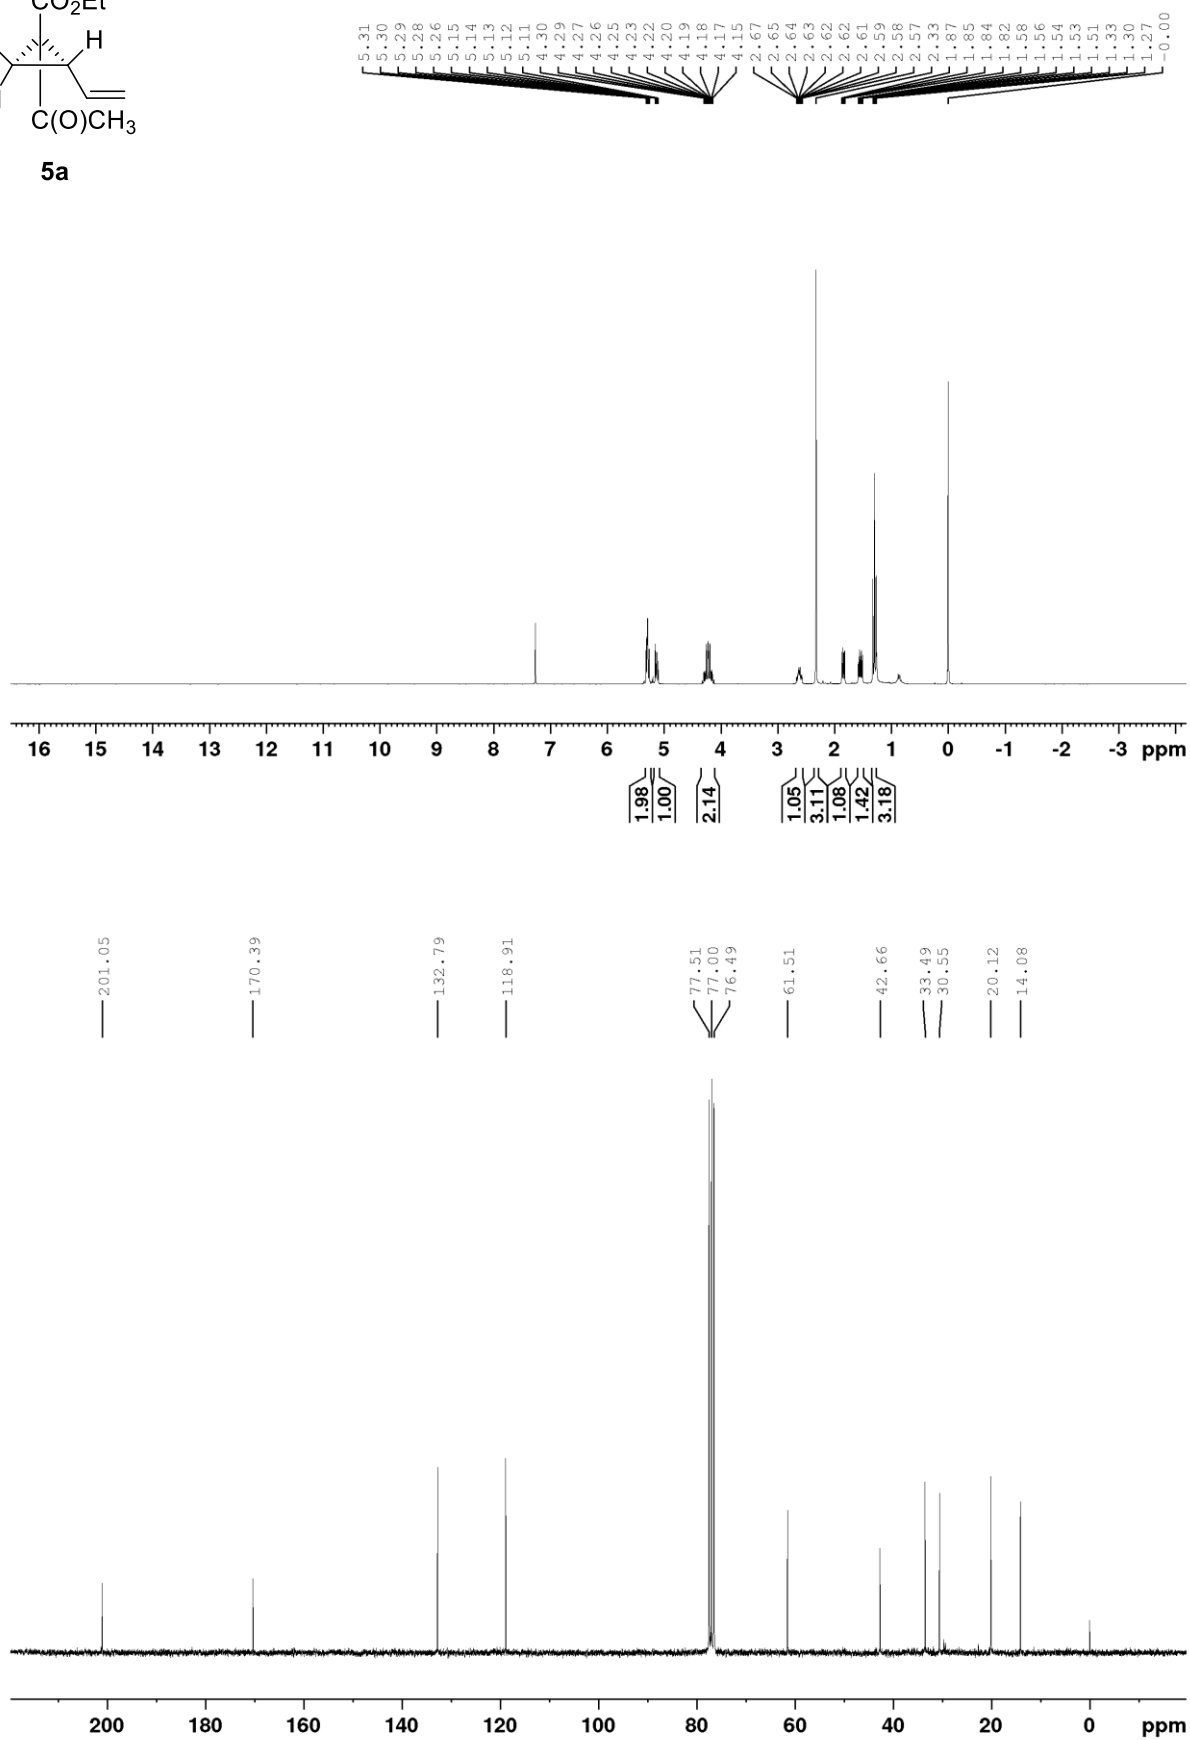



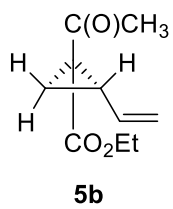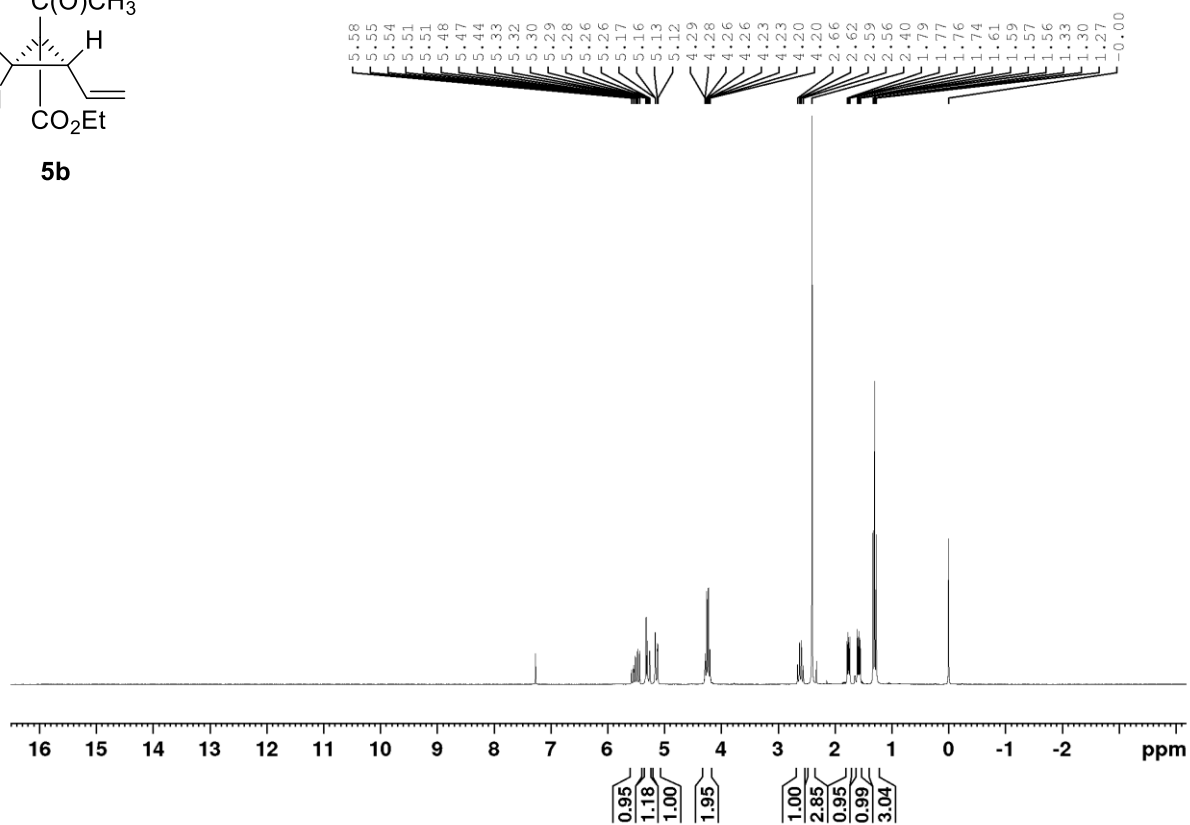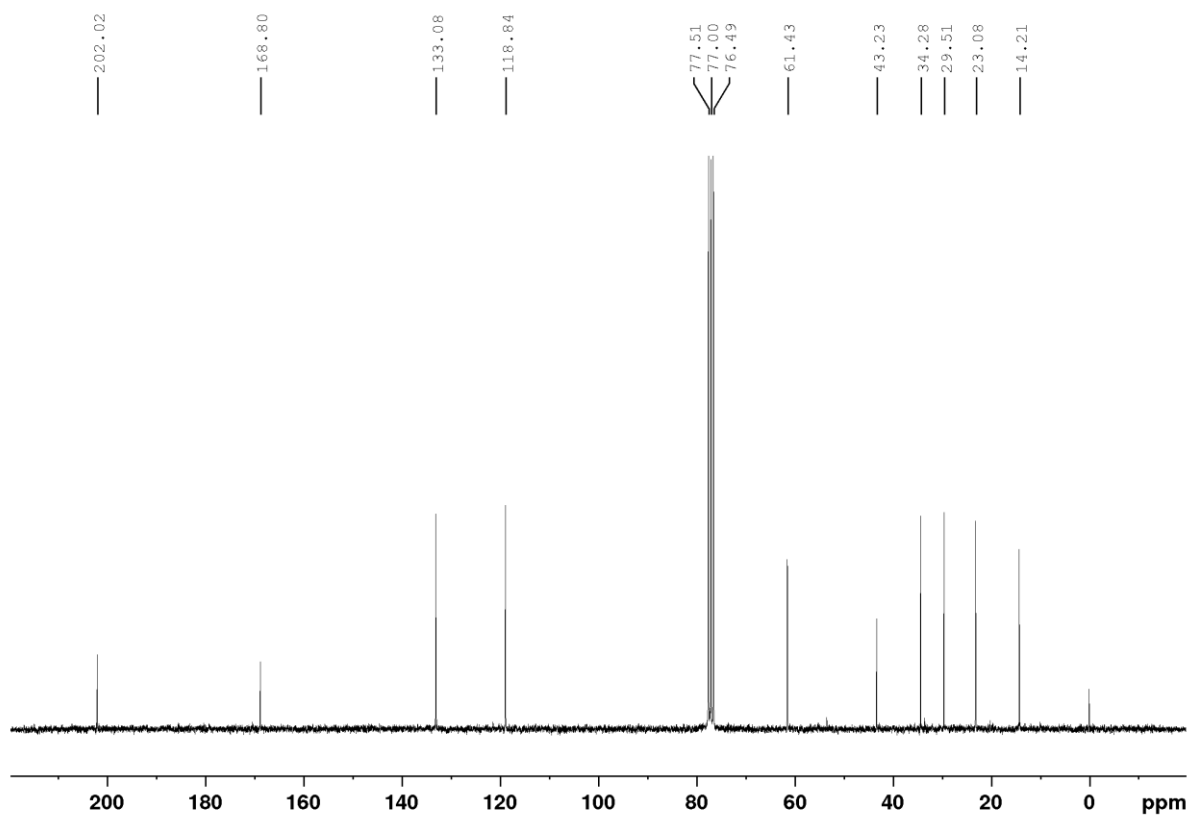

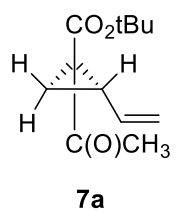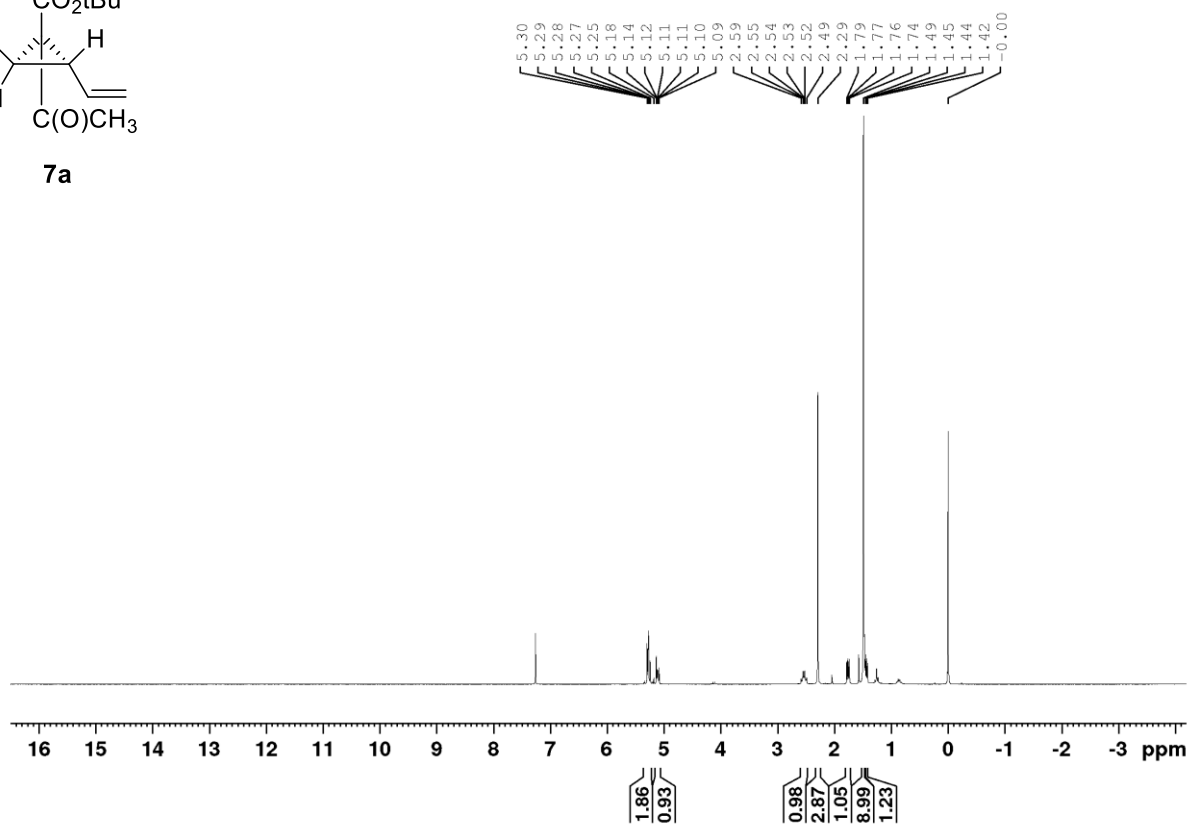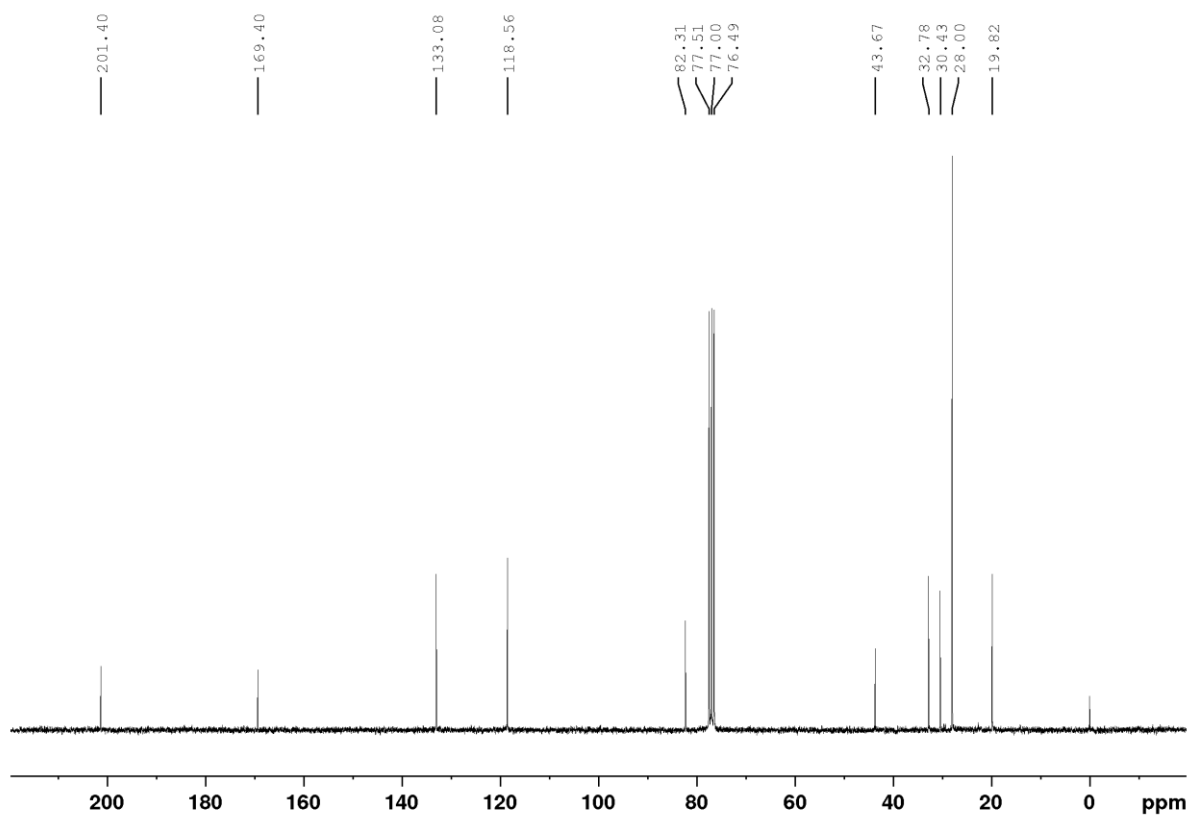

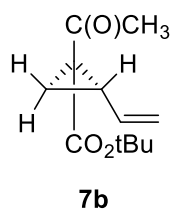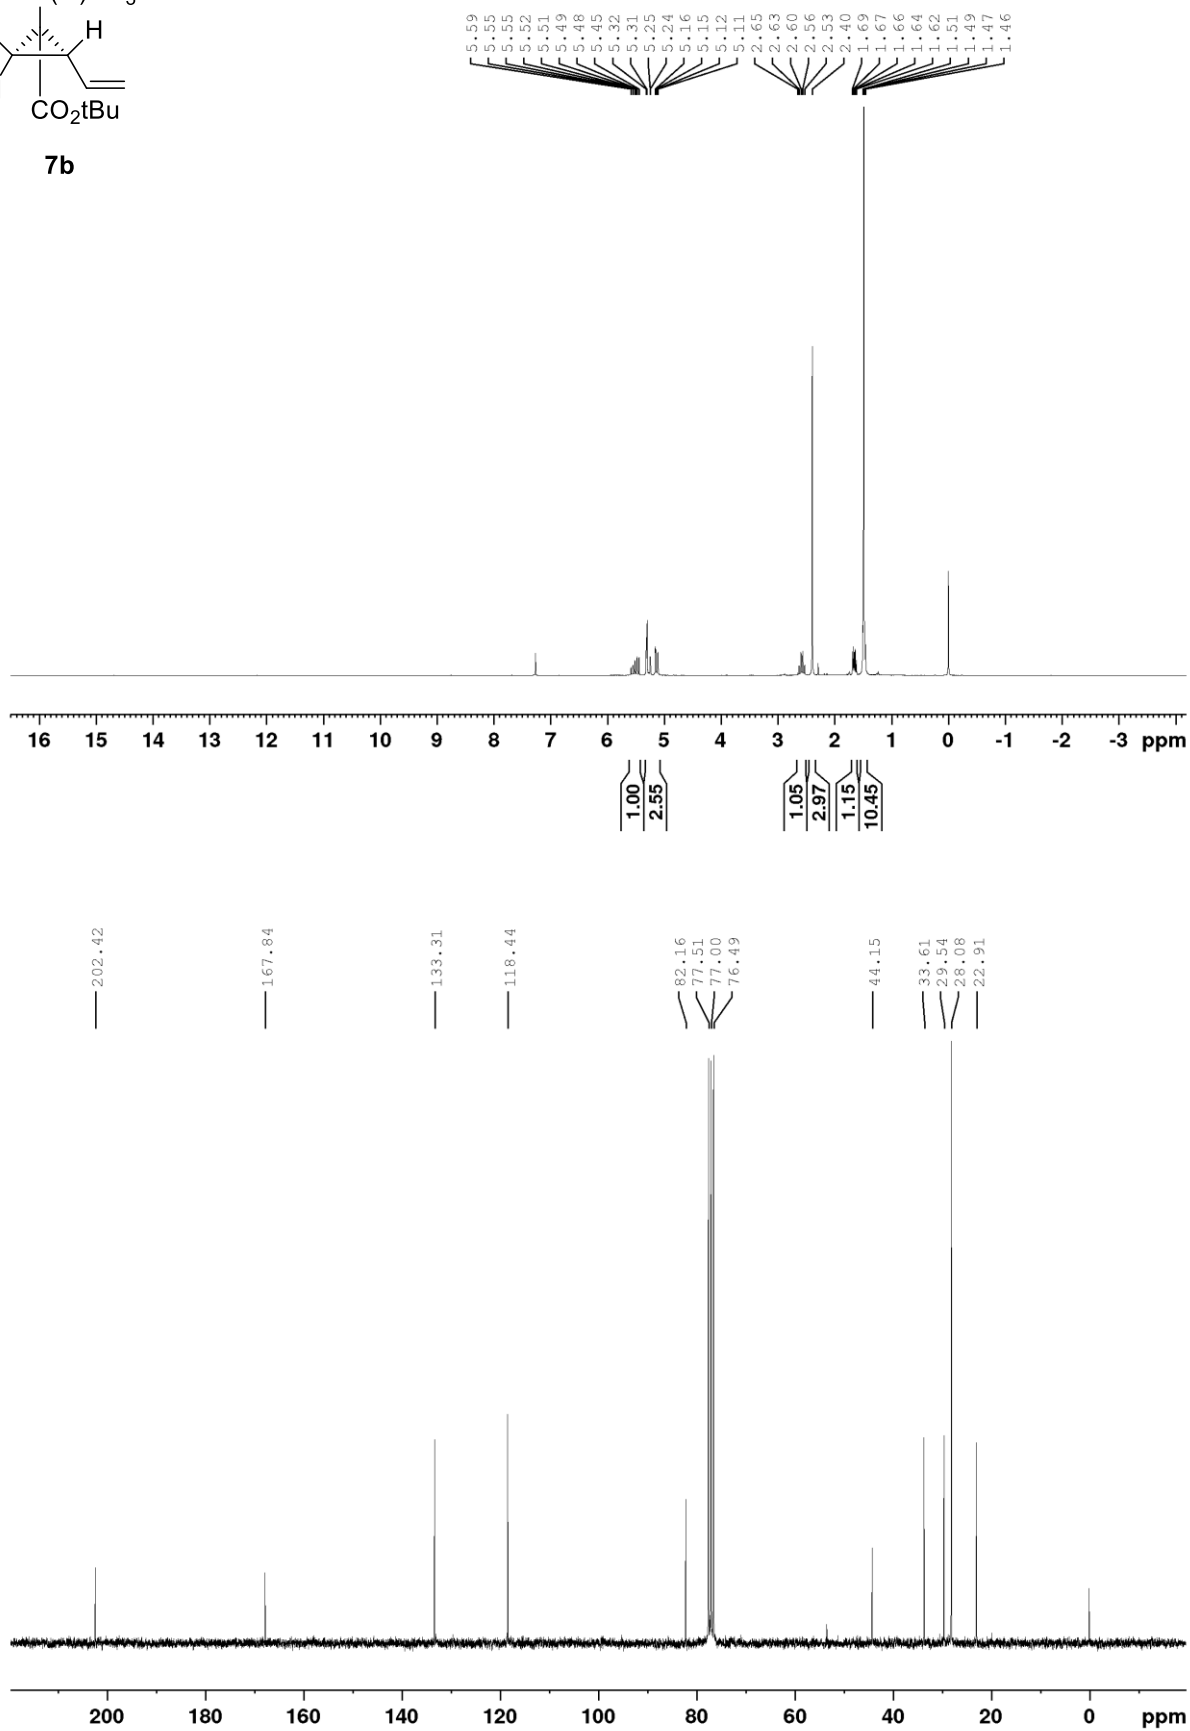

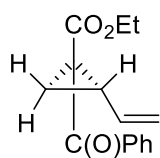

9a

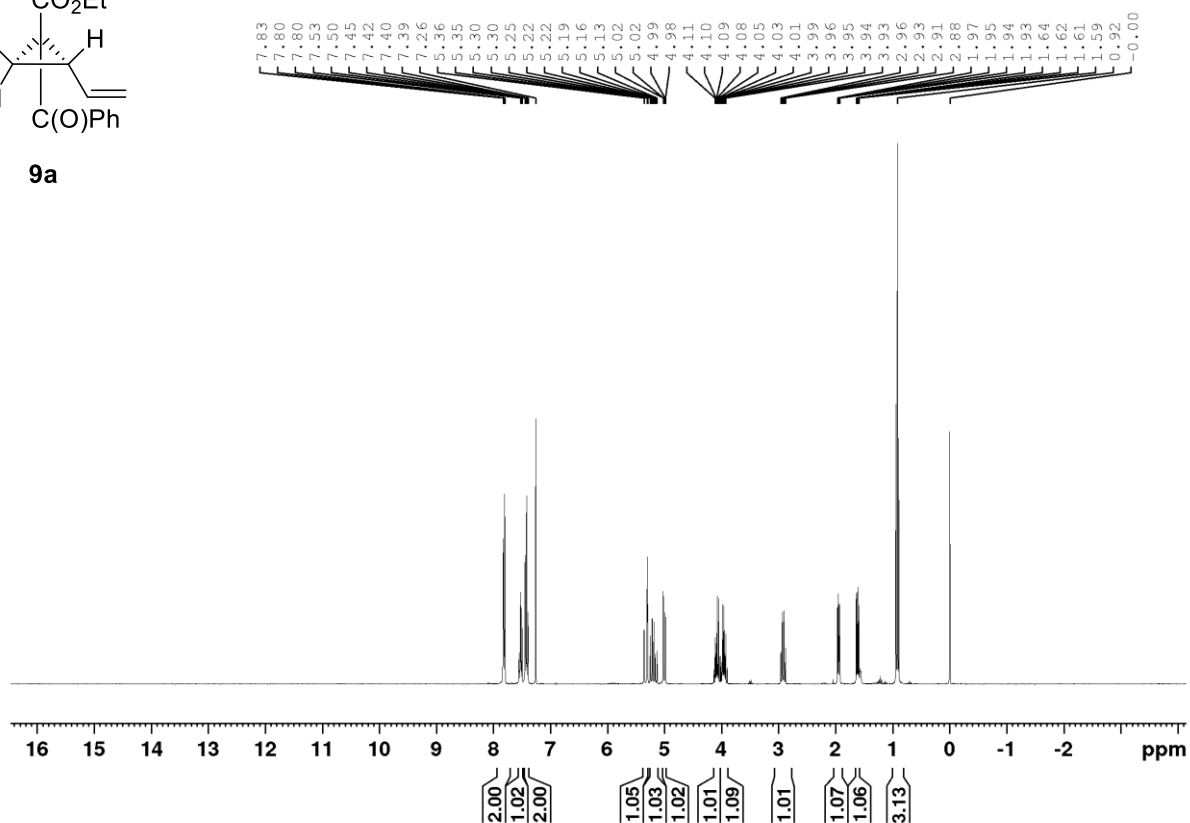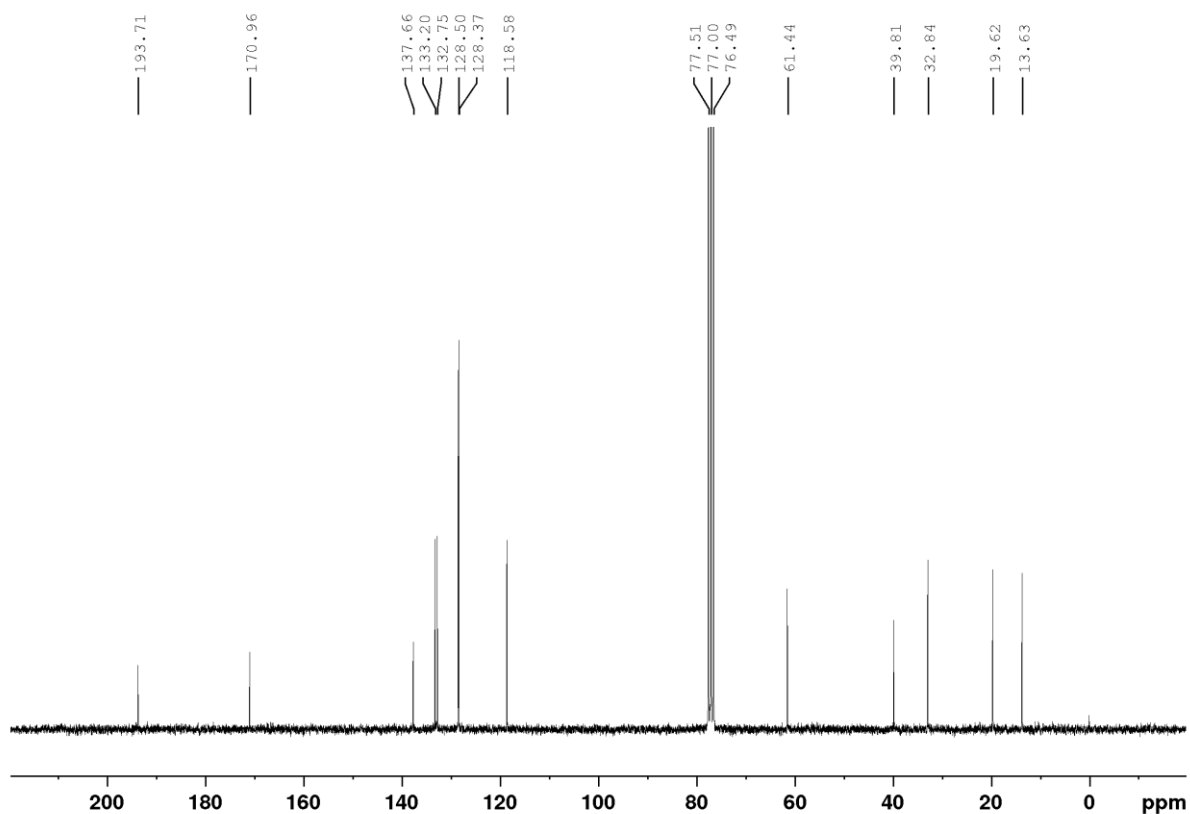

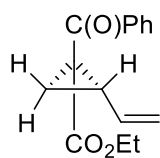

**9b**

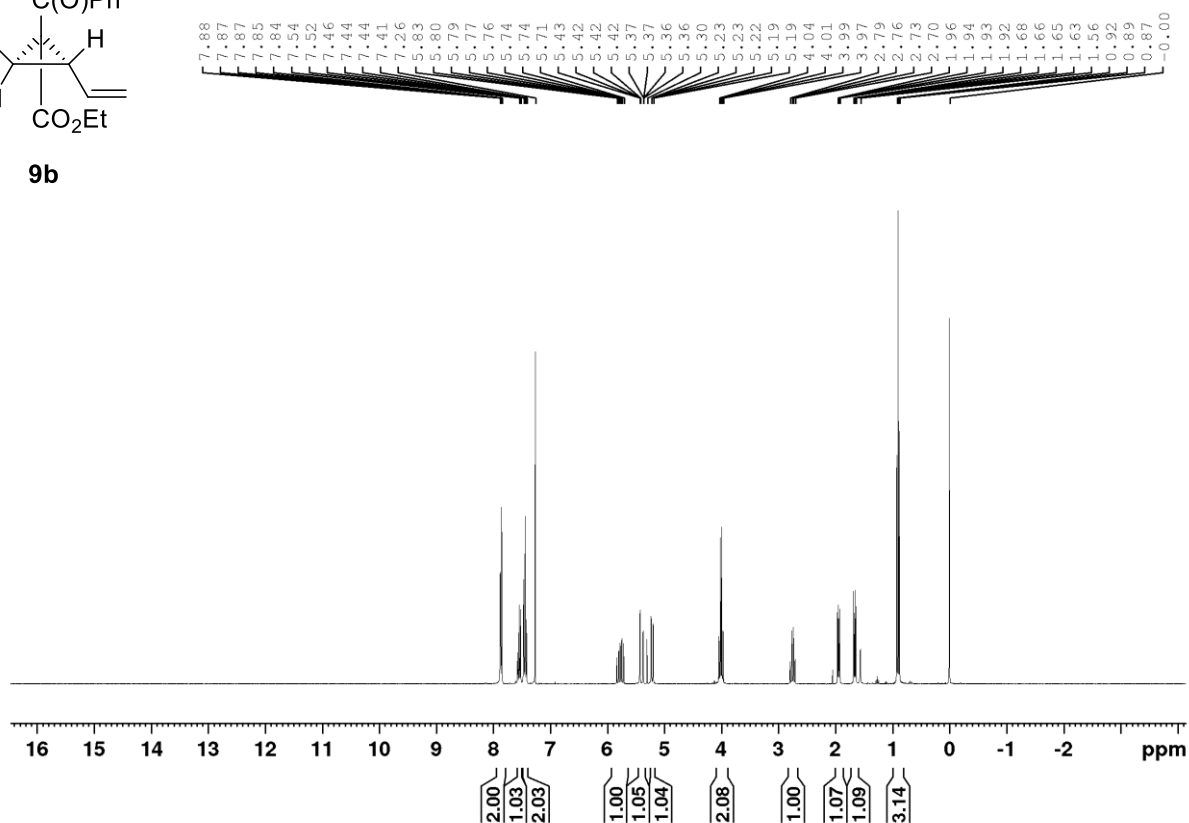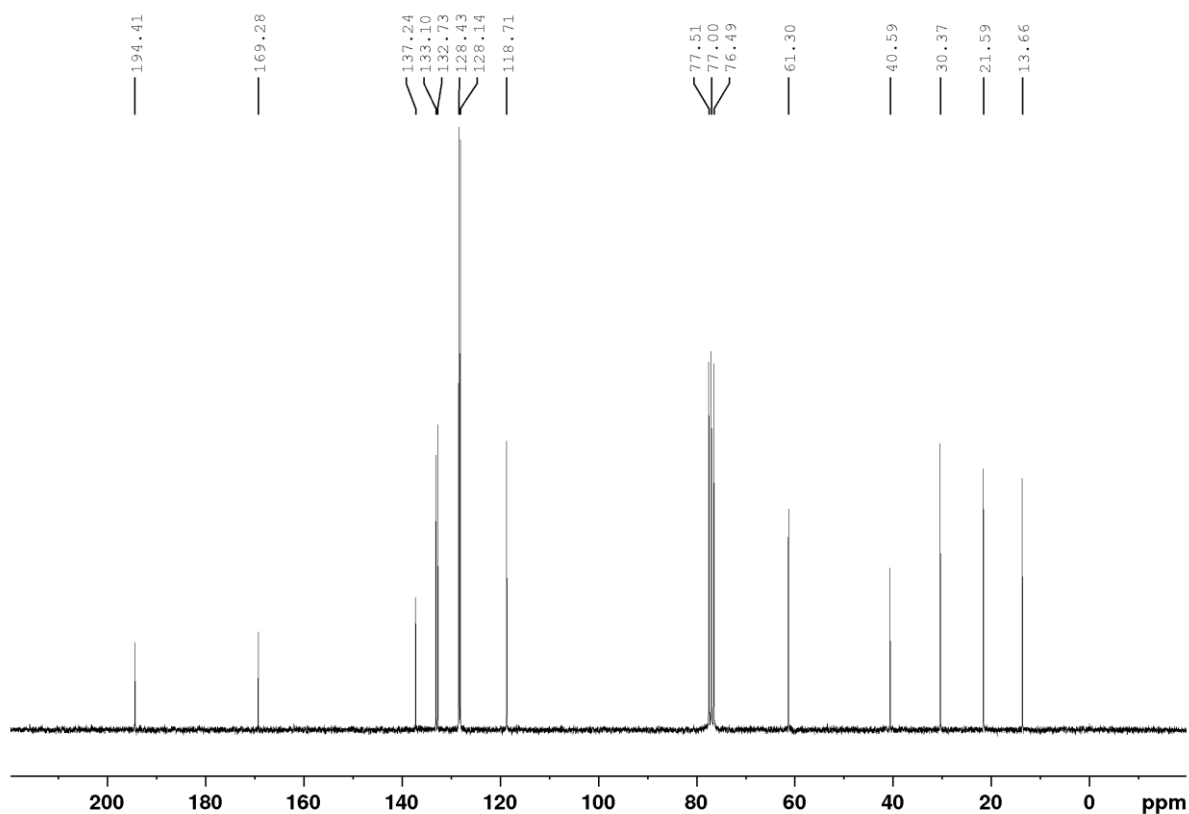

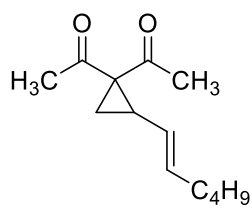

11

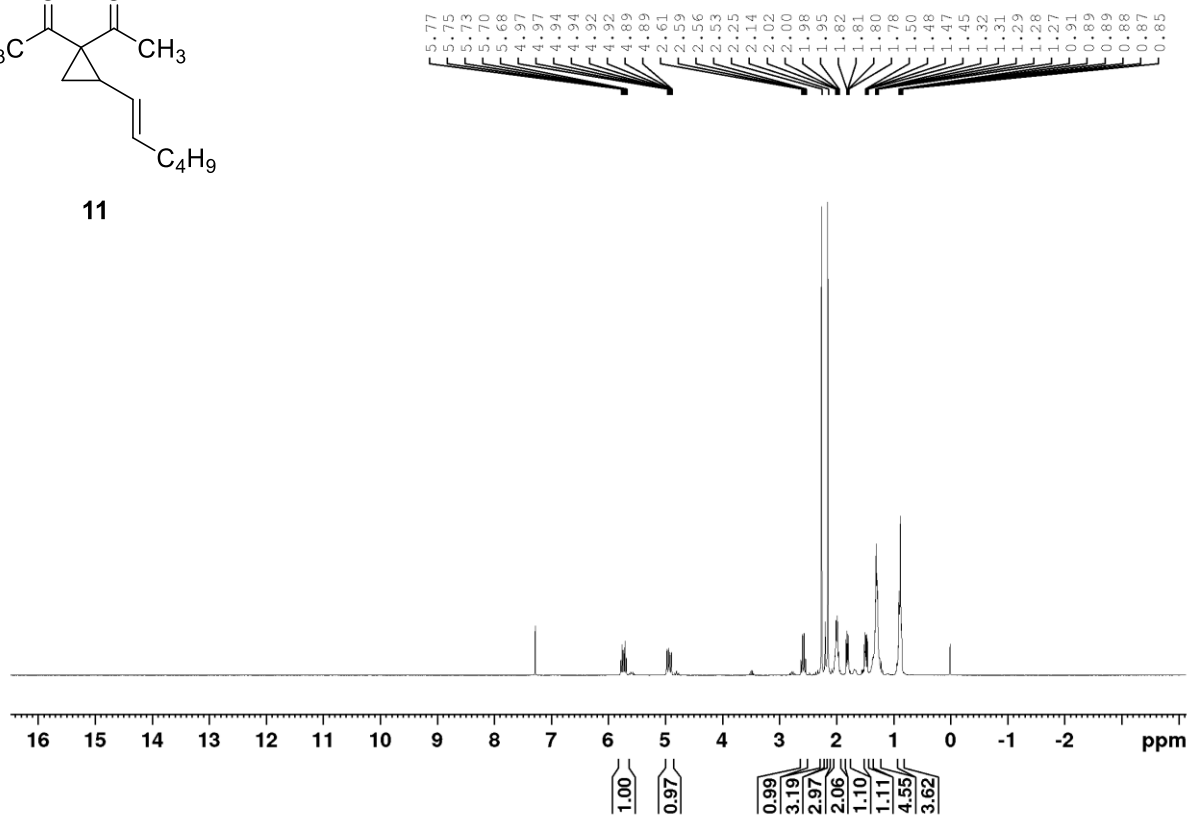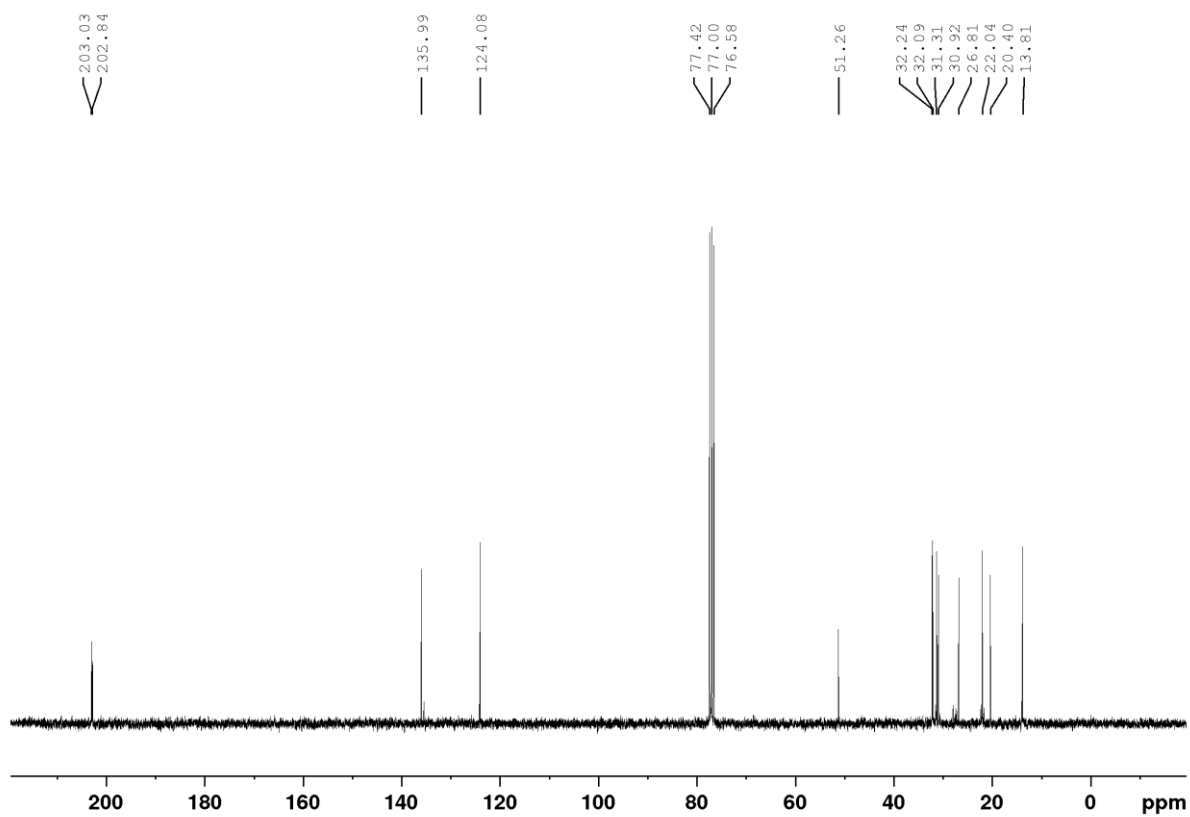

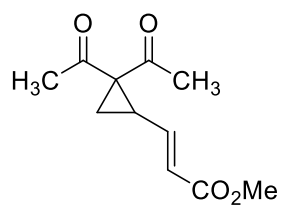

**13**

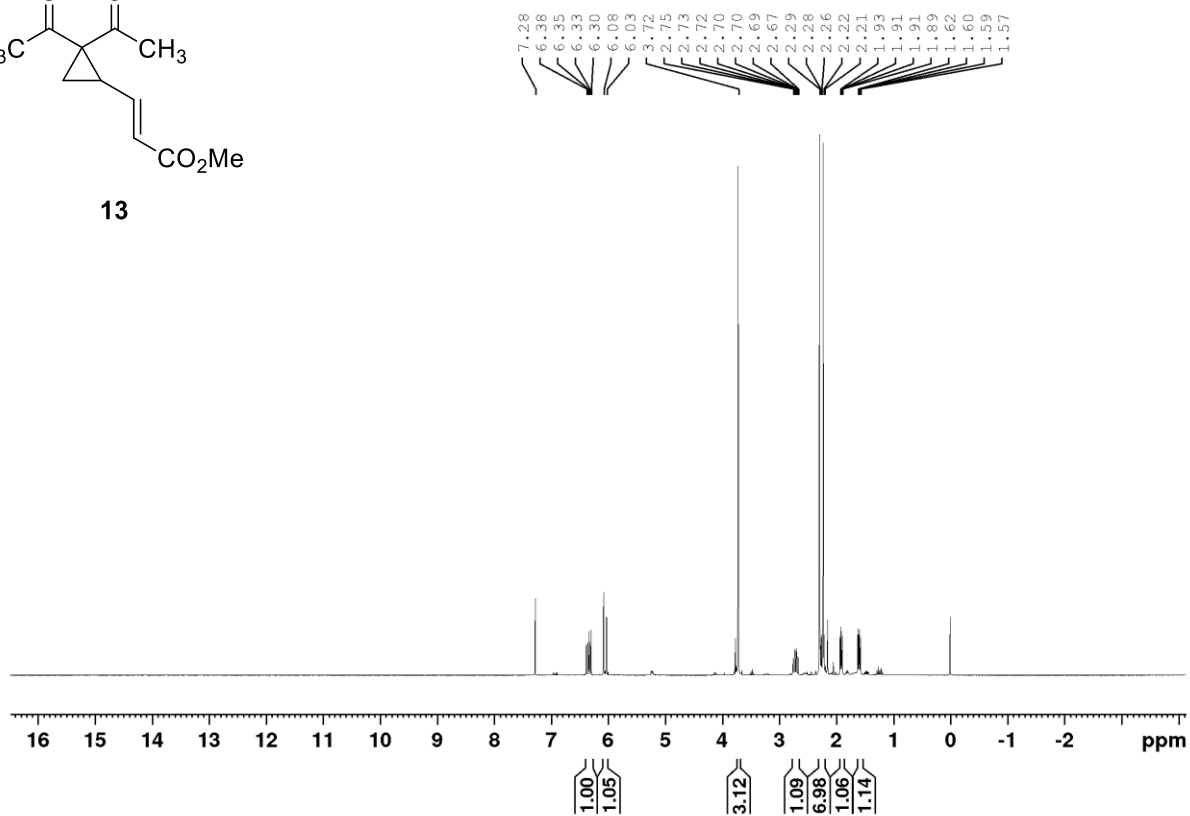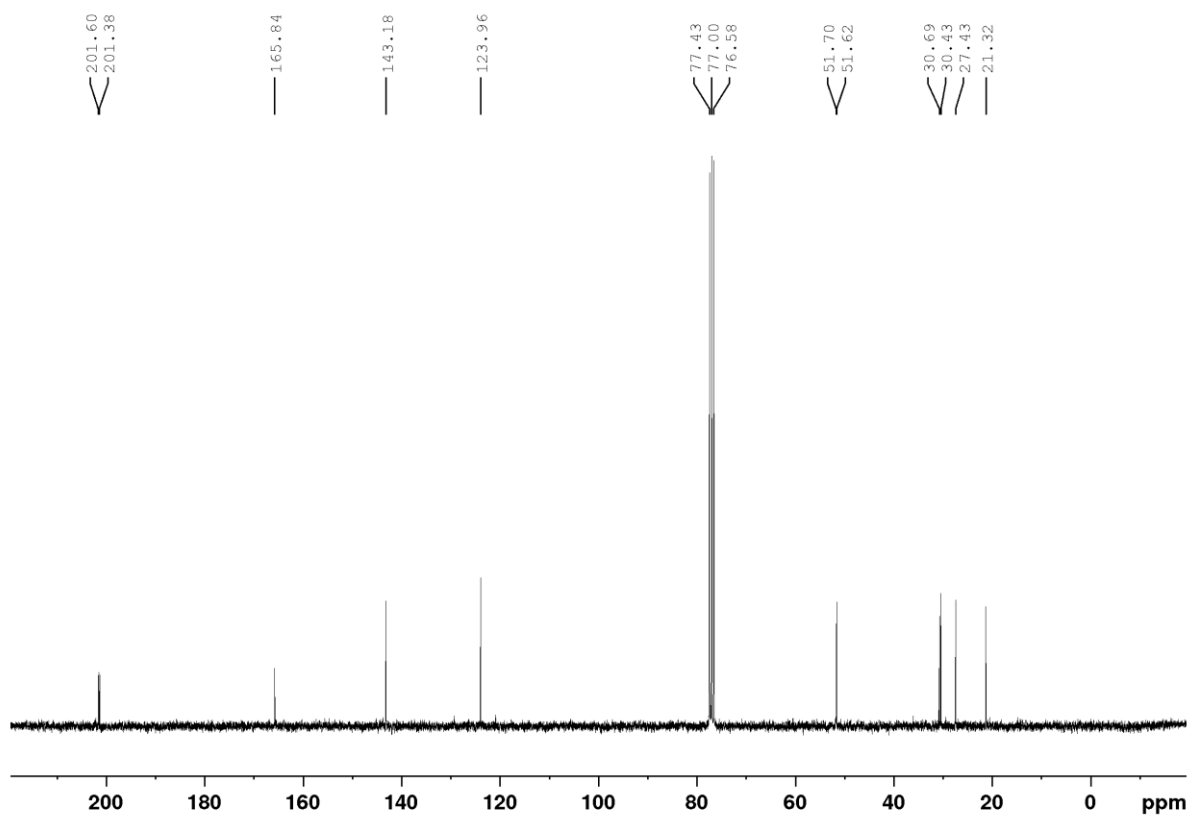

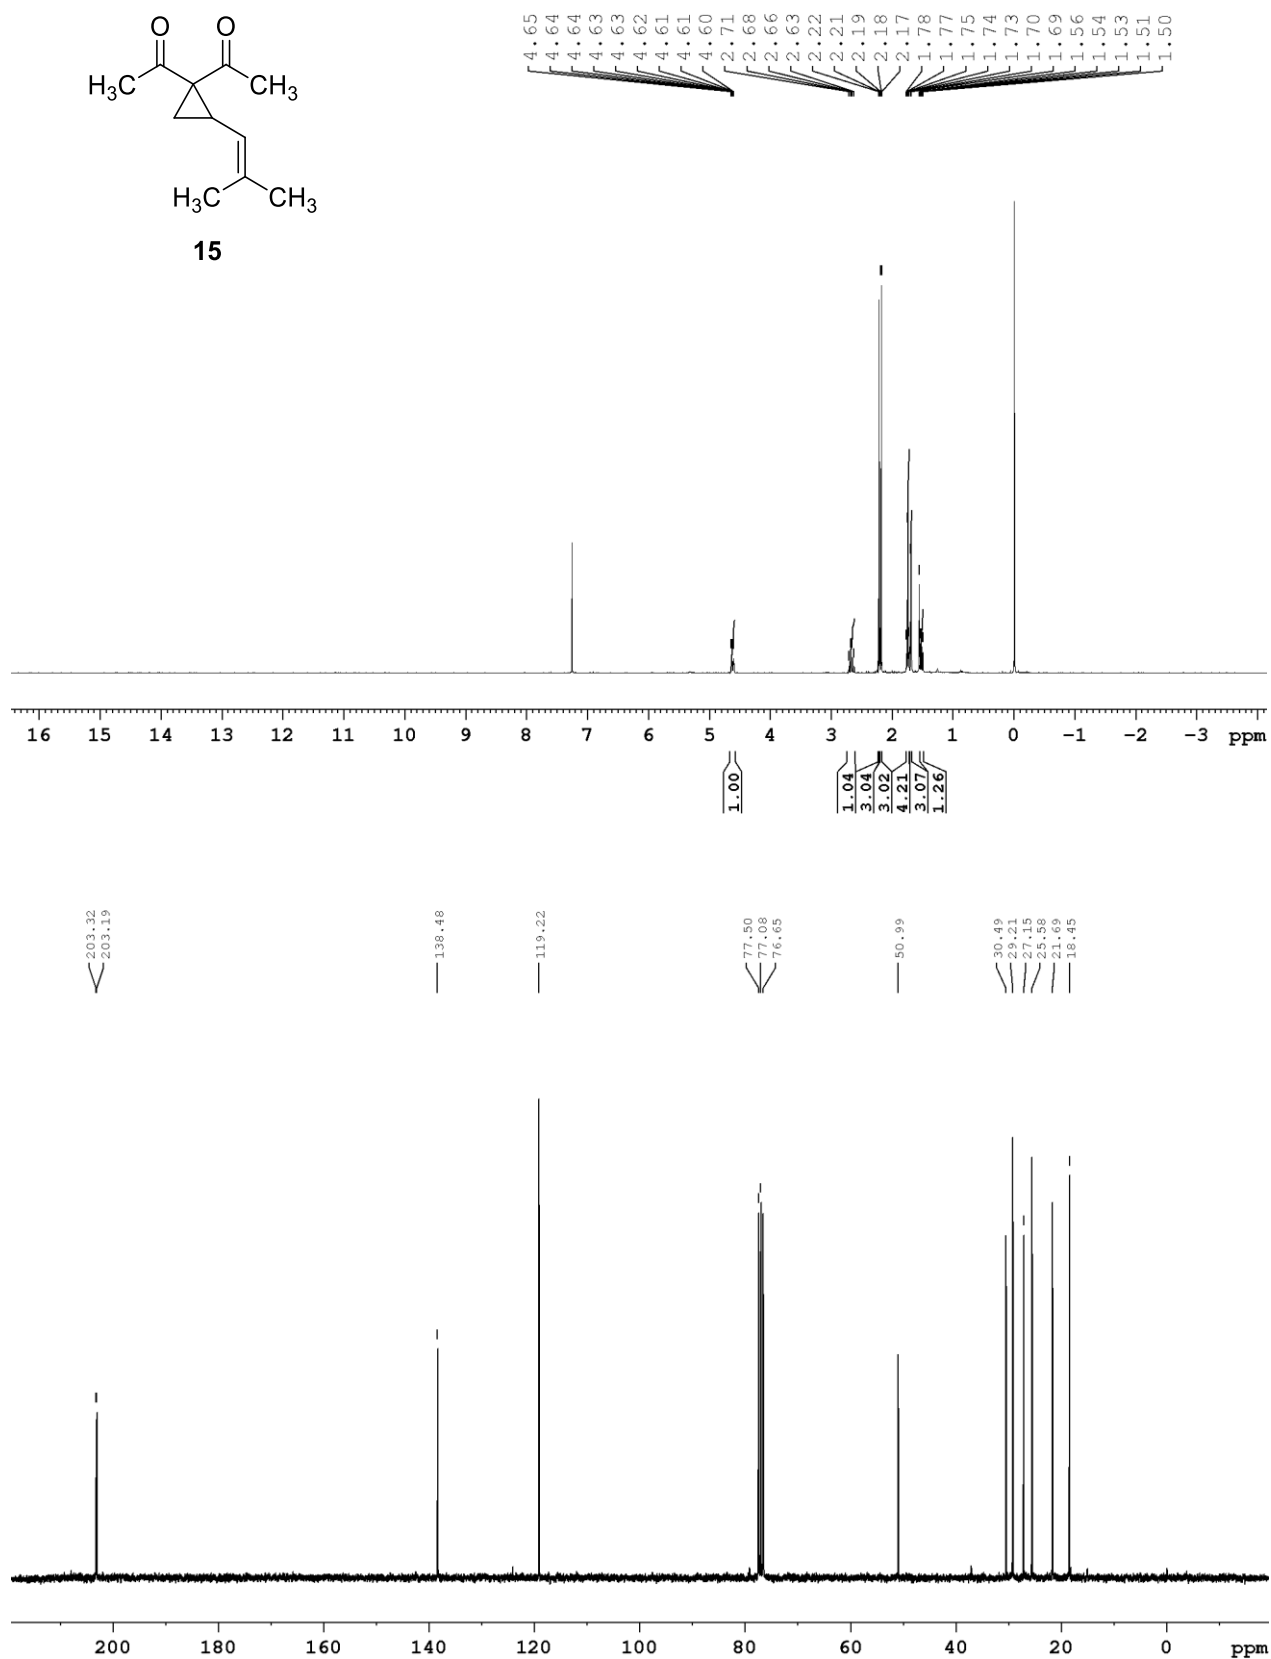



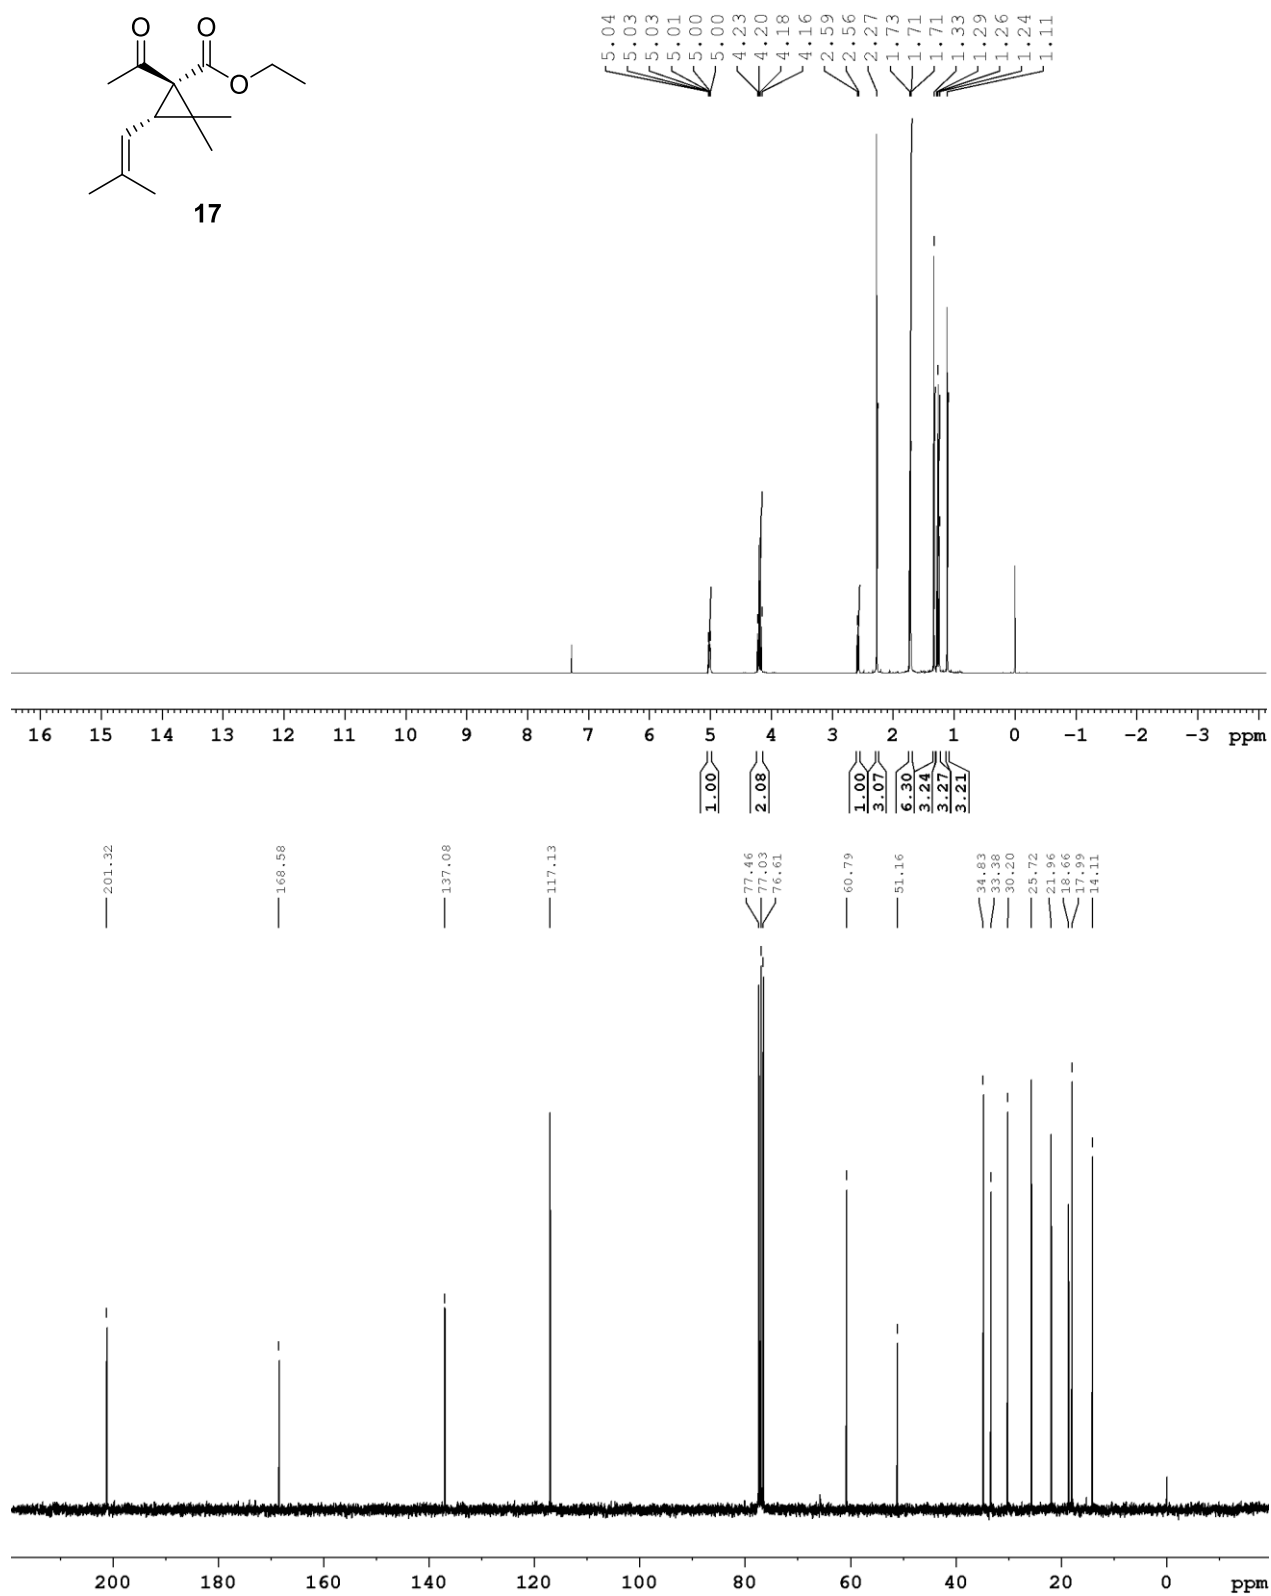

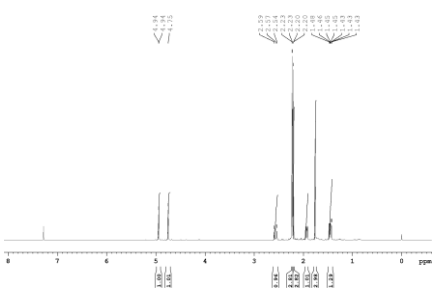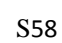

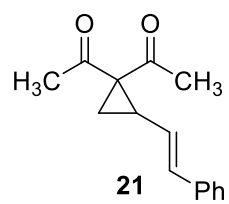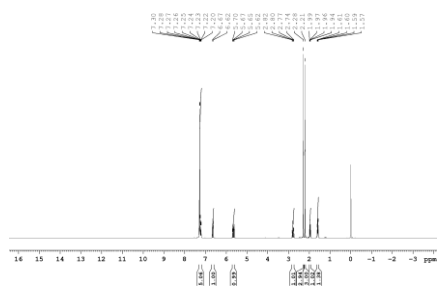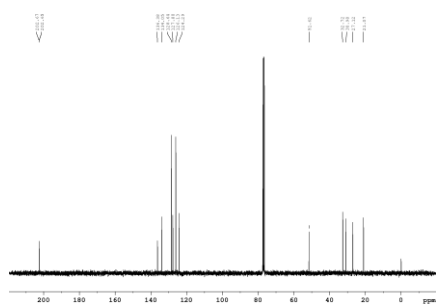

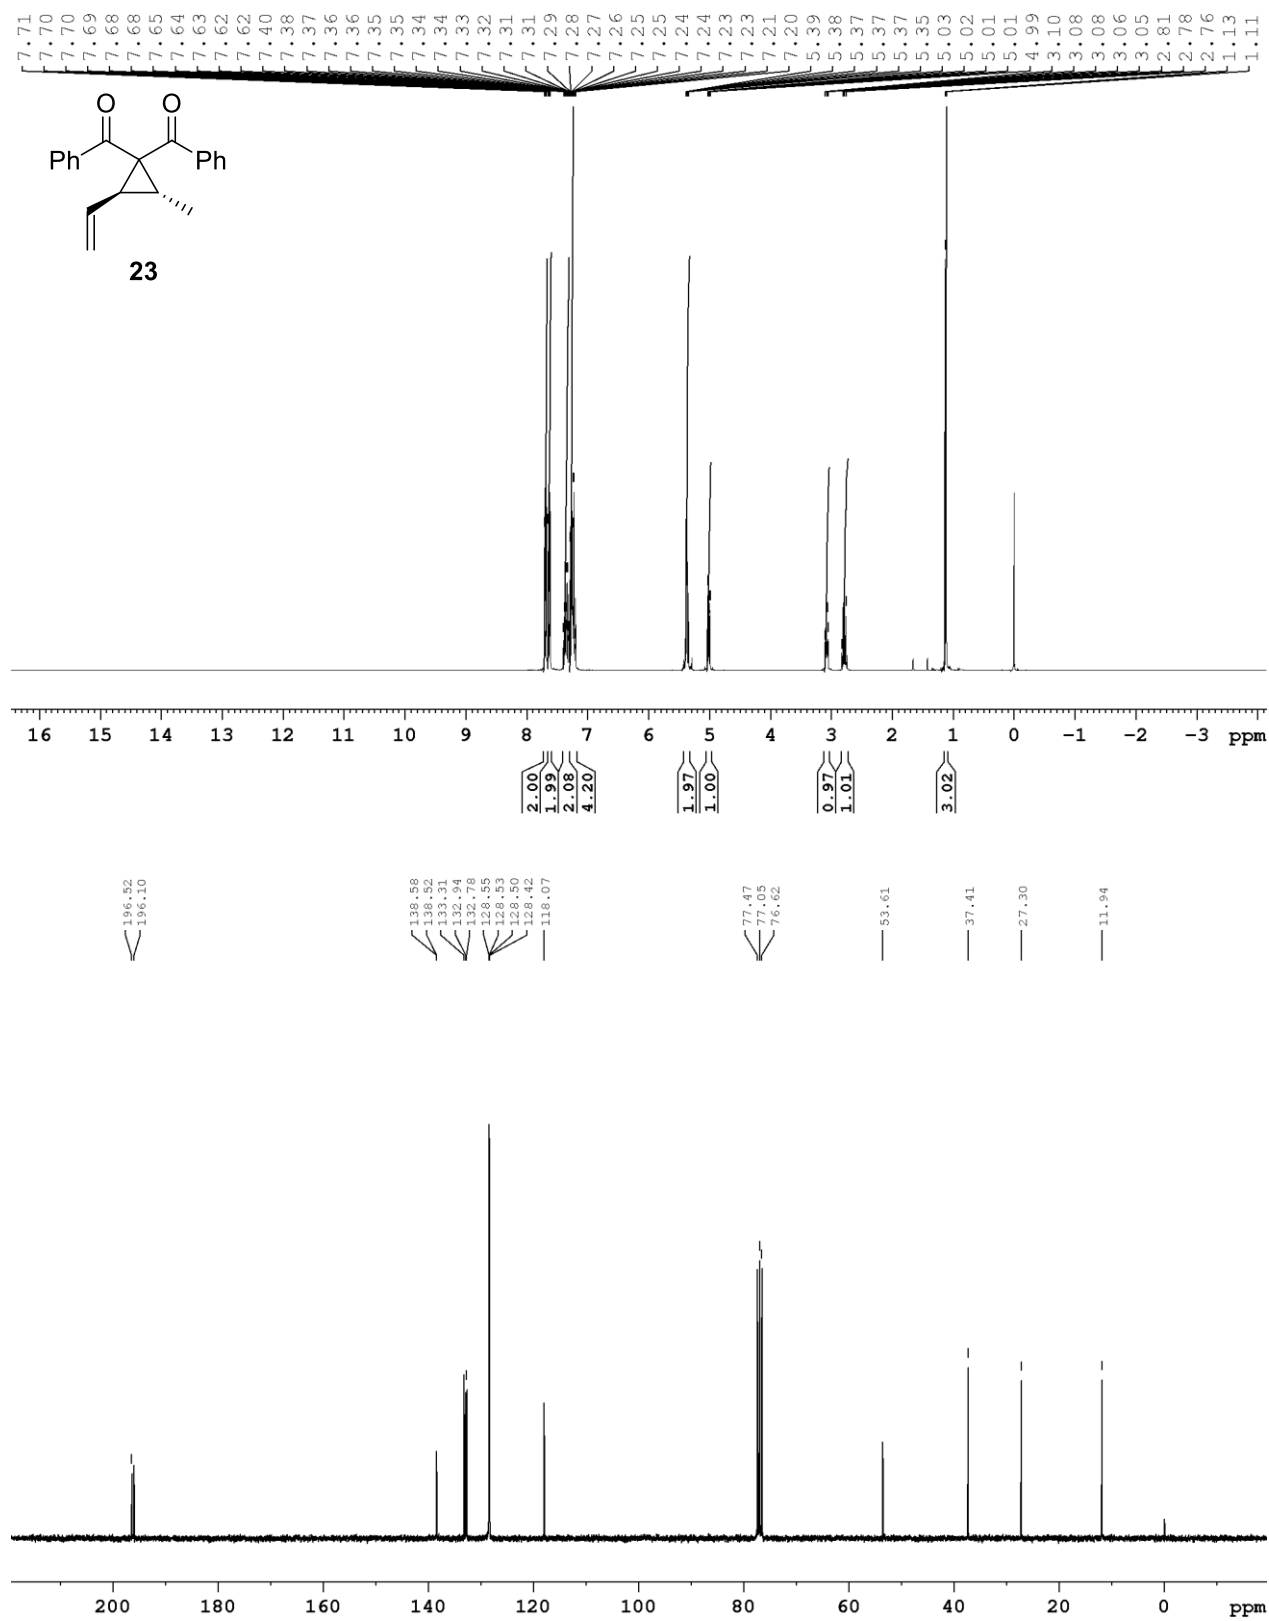

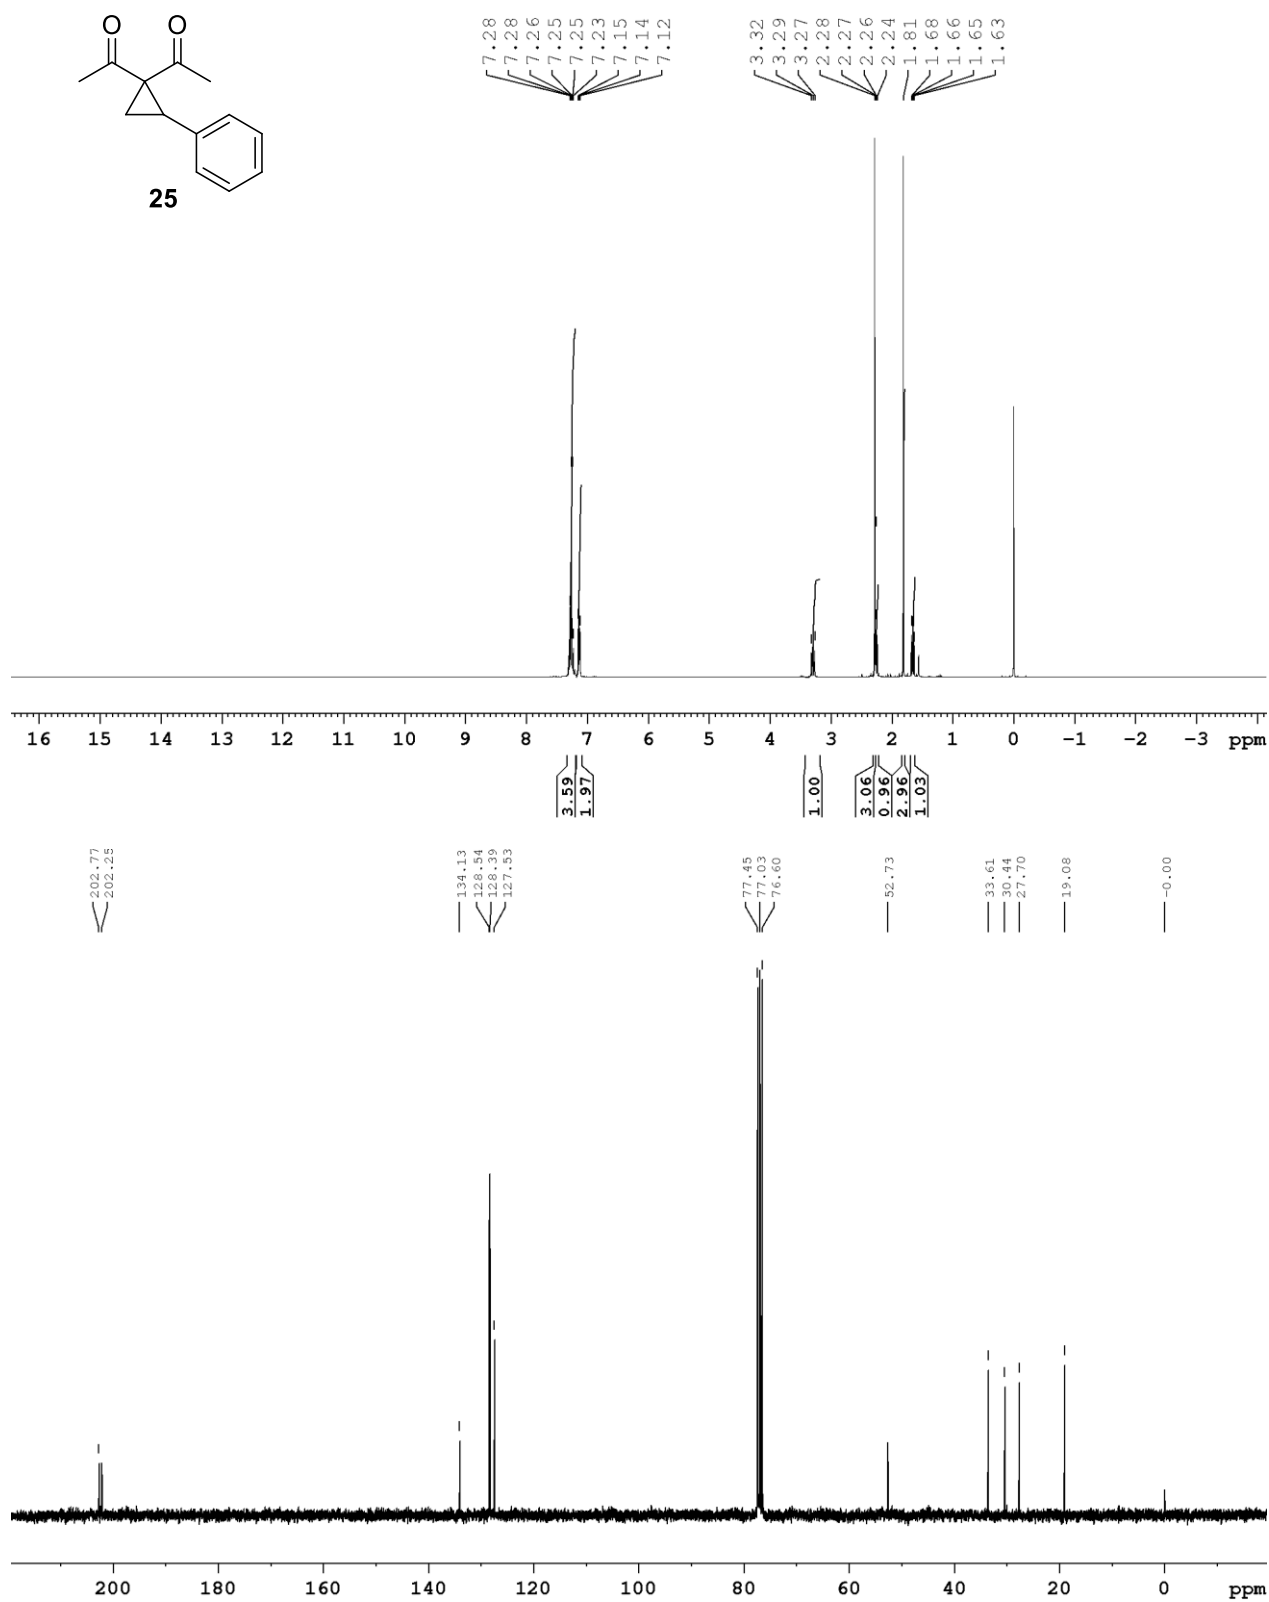

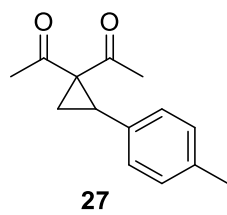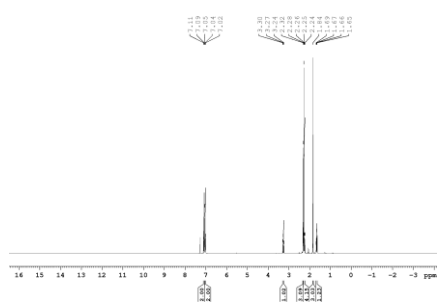

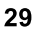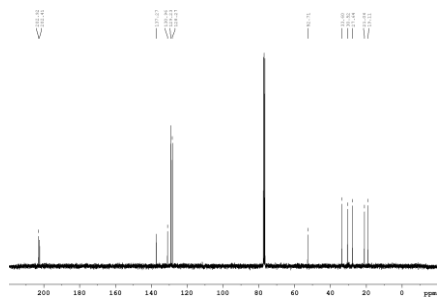

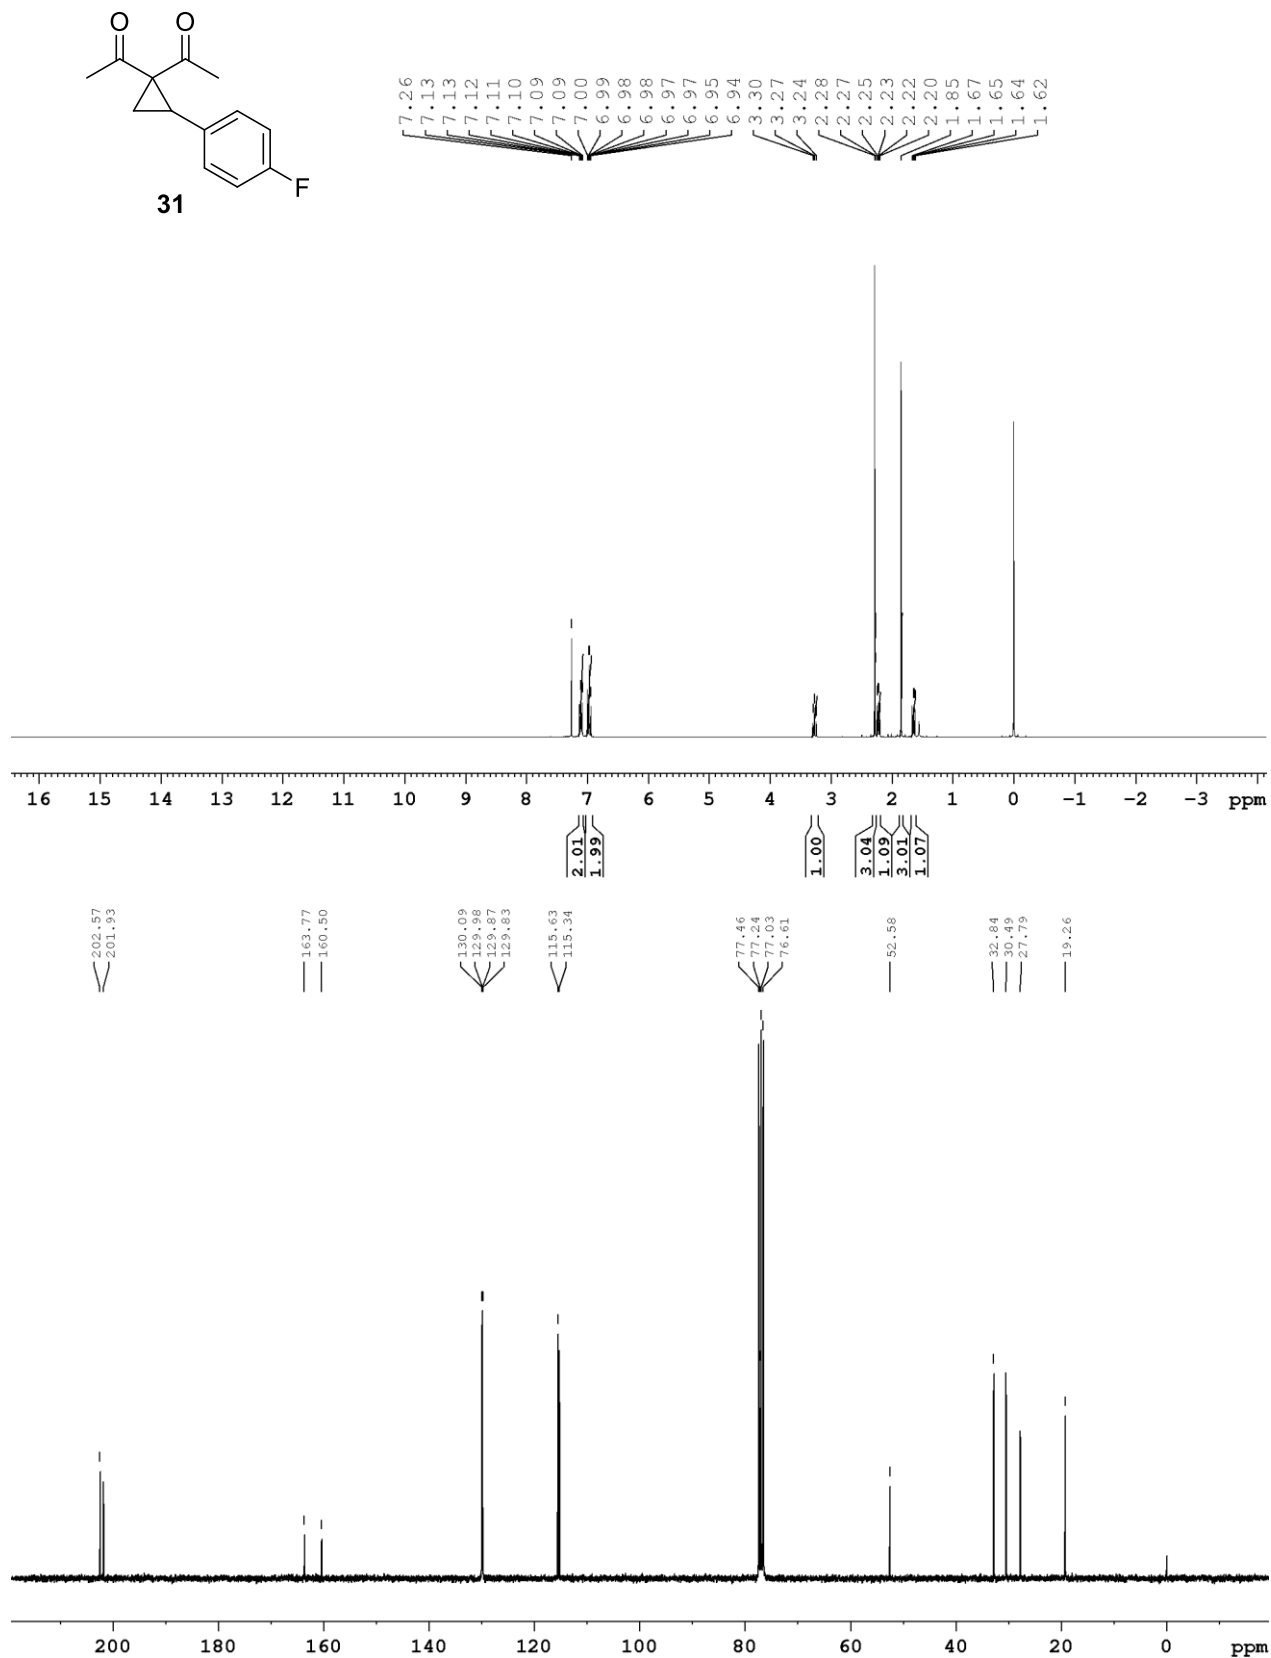



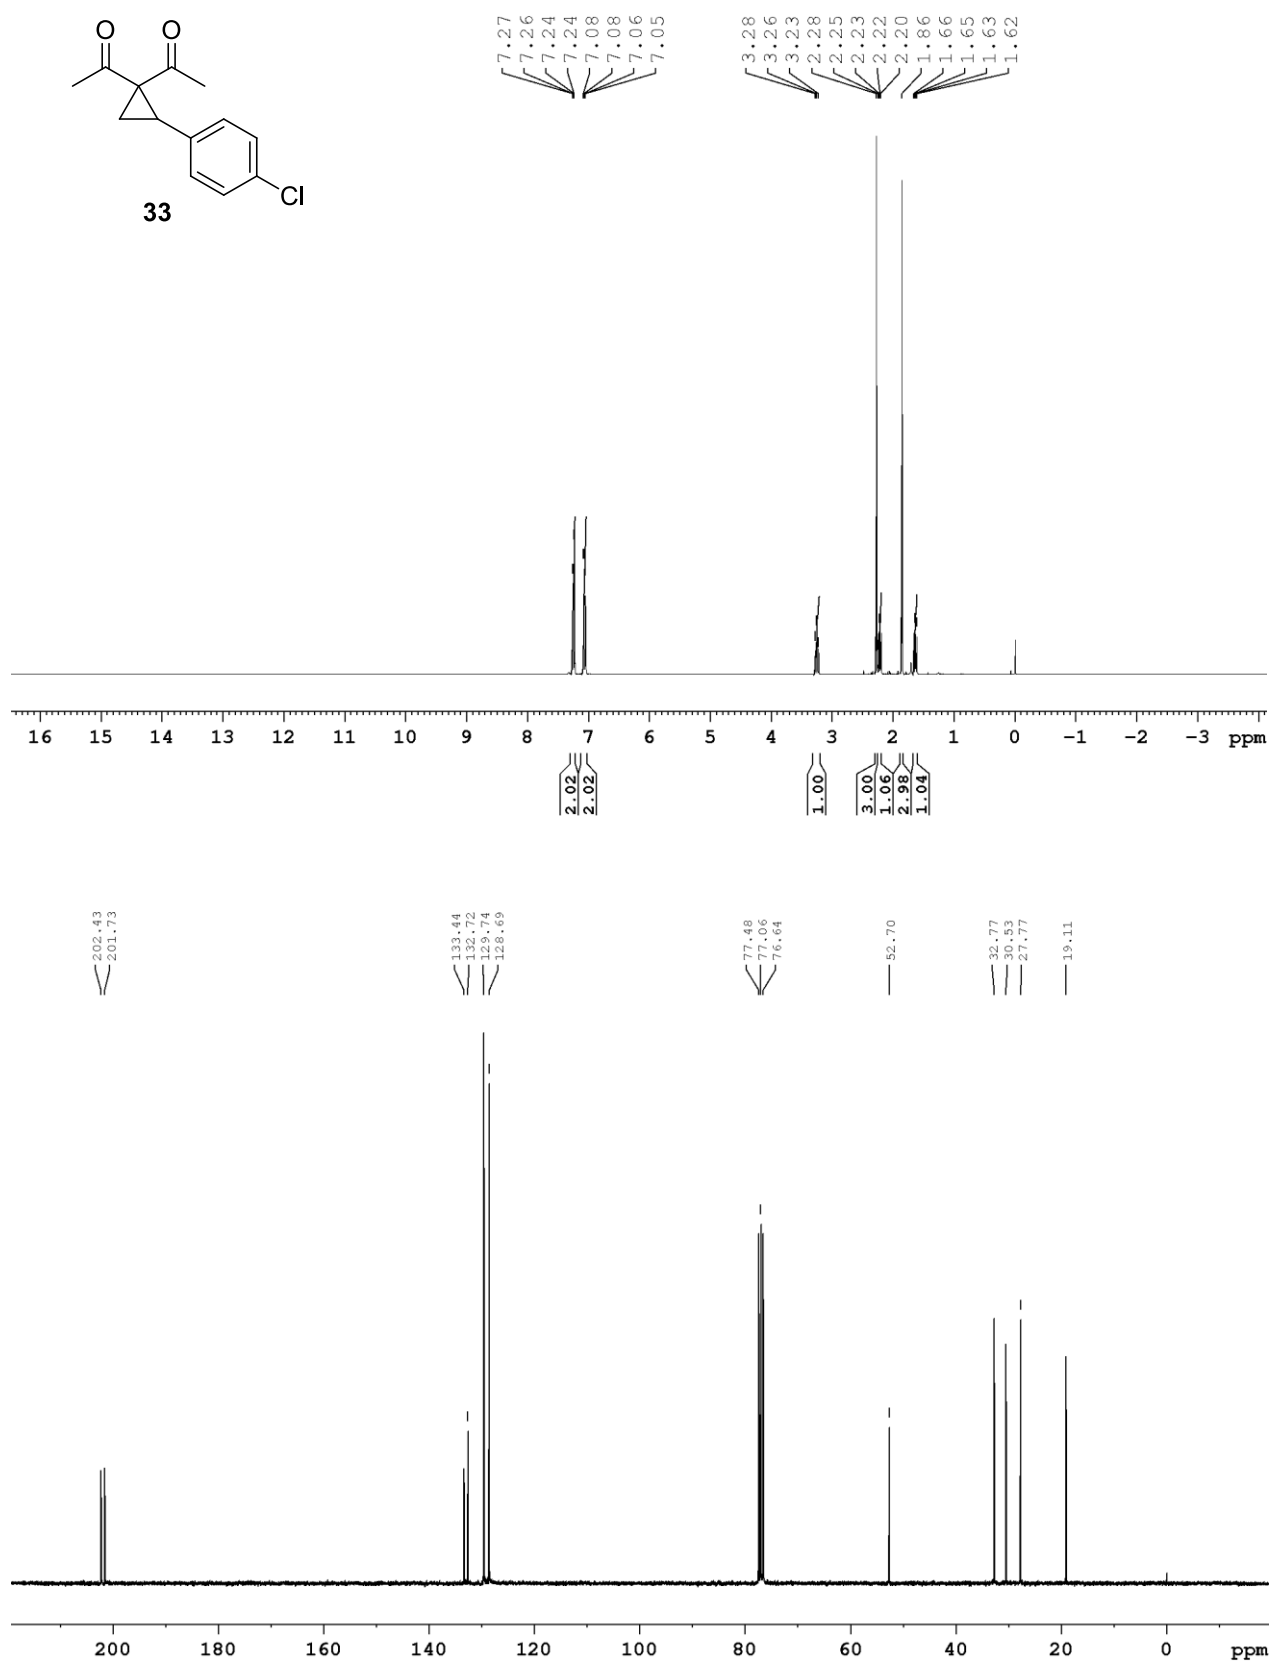

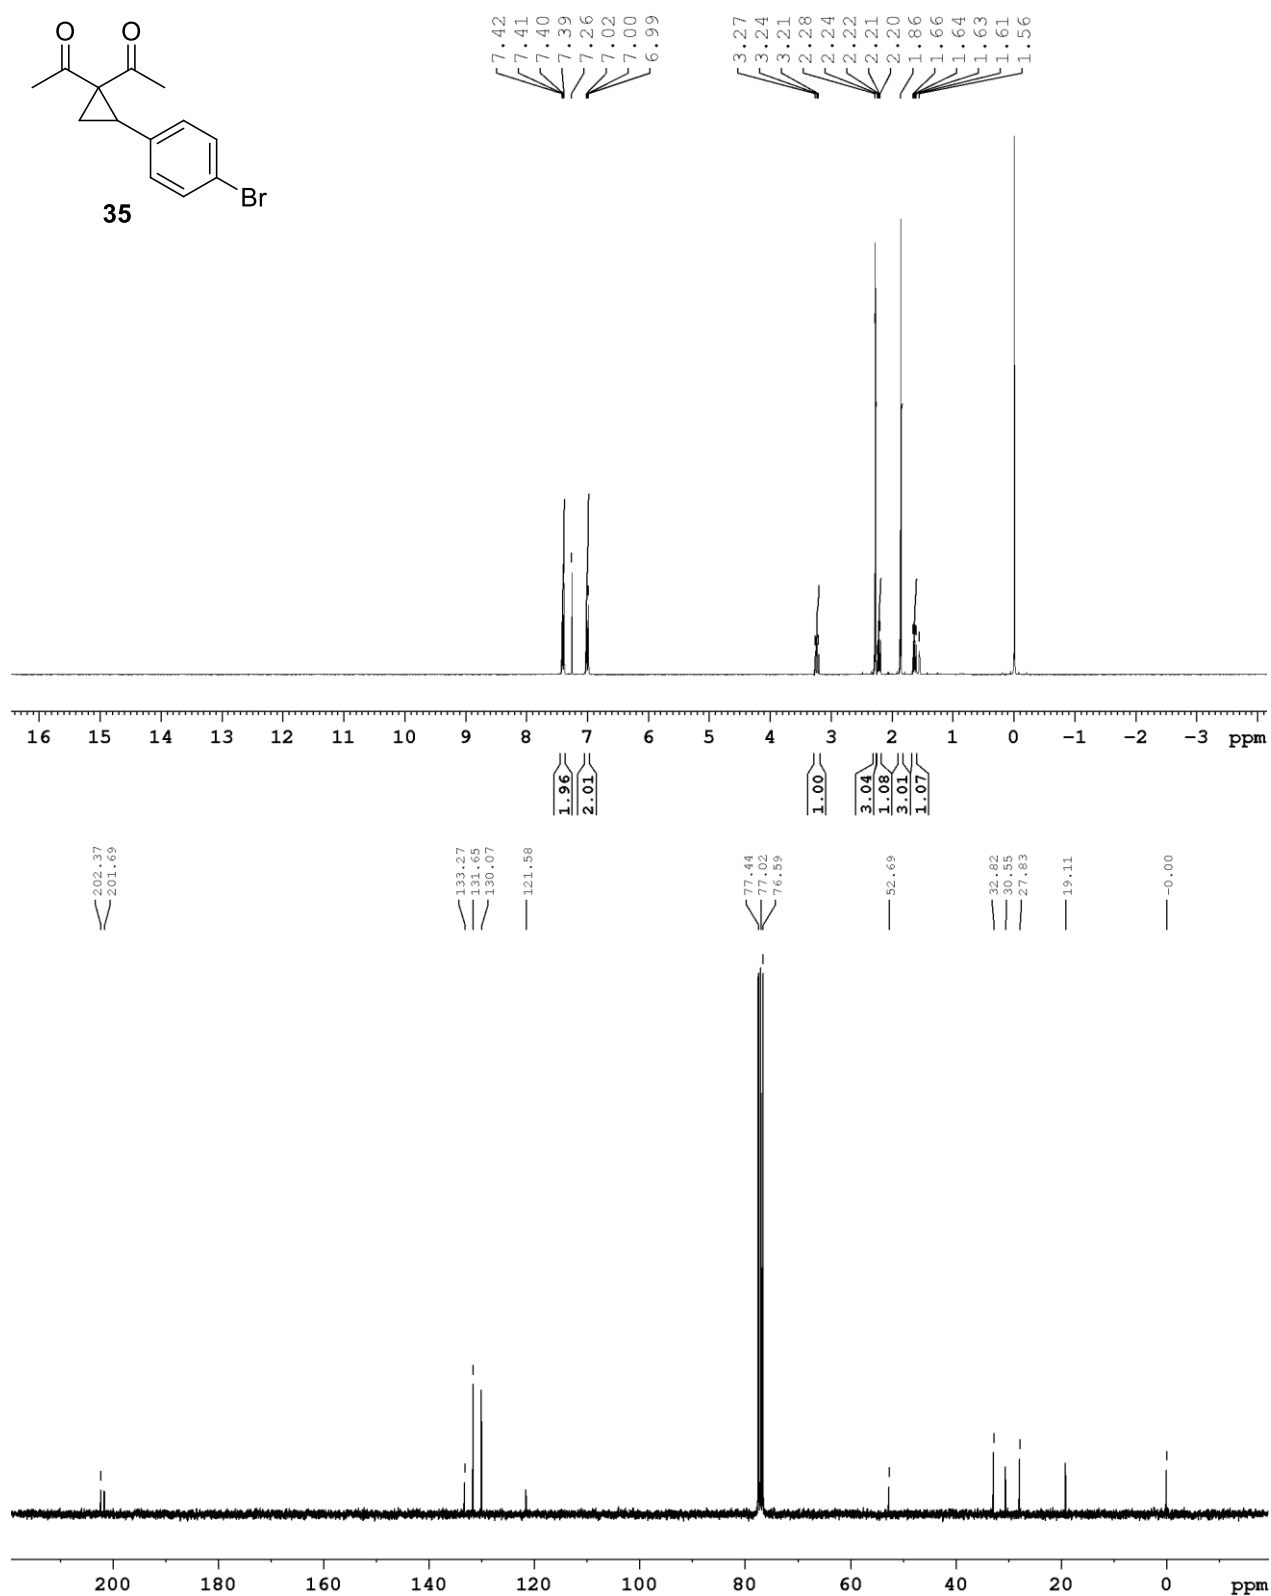

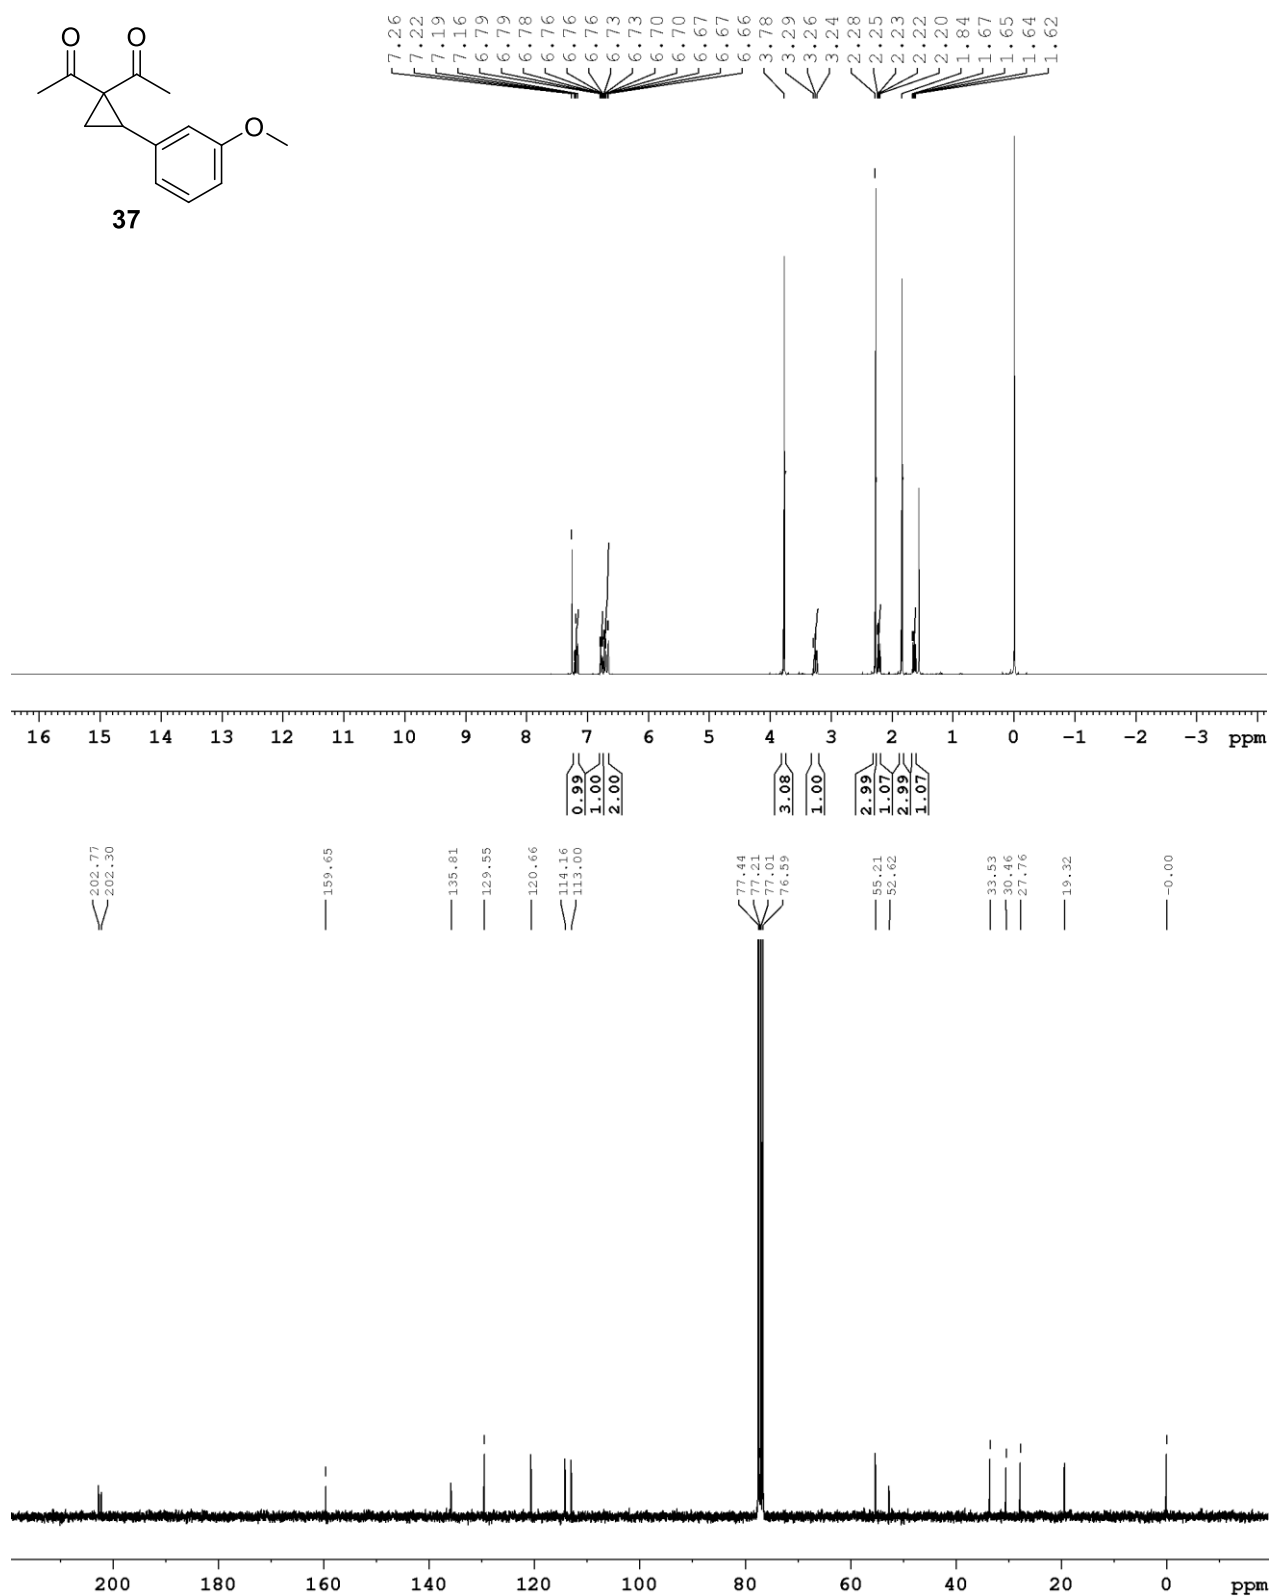

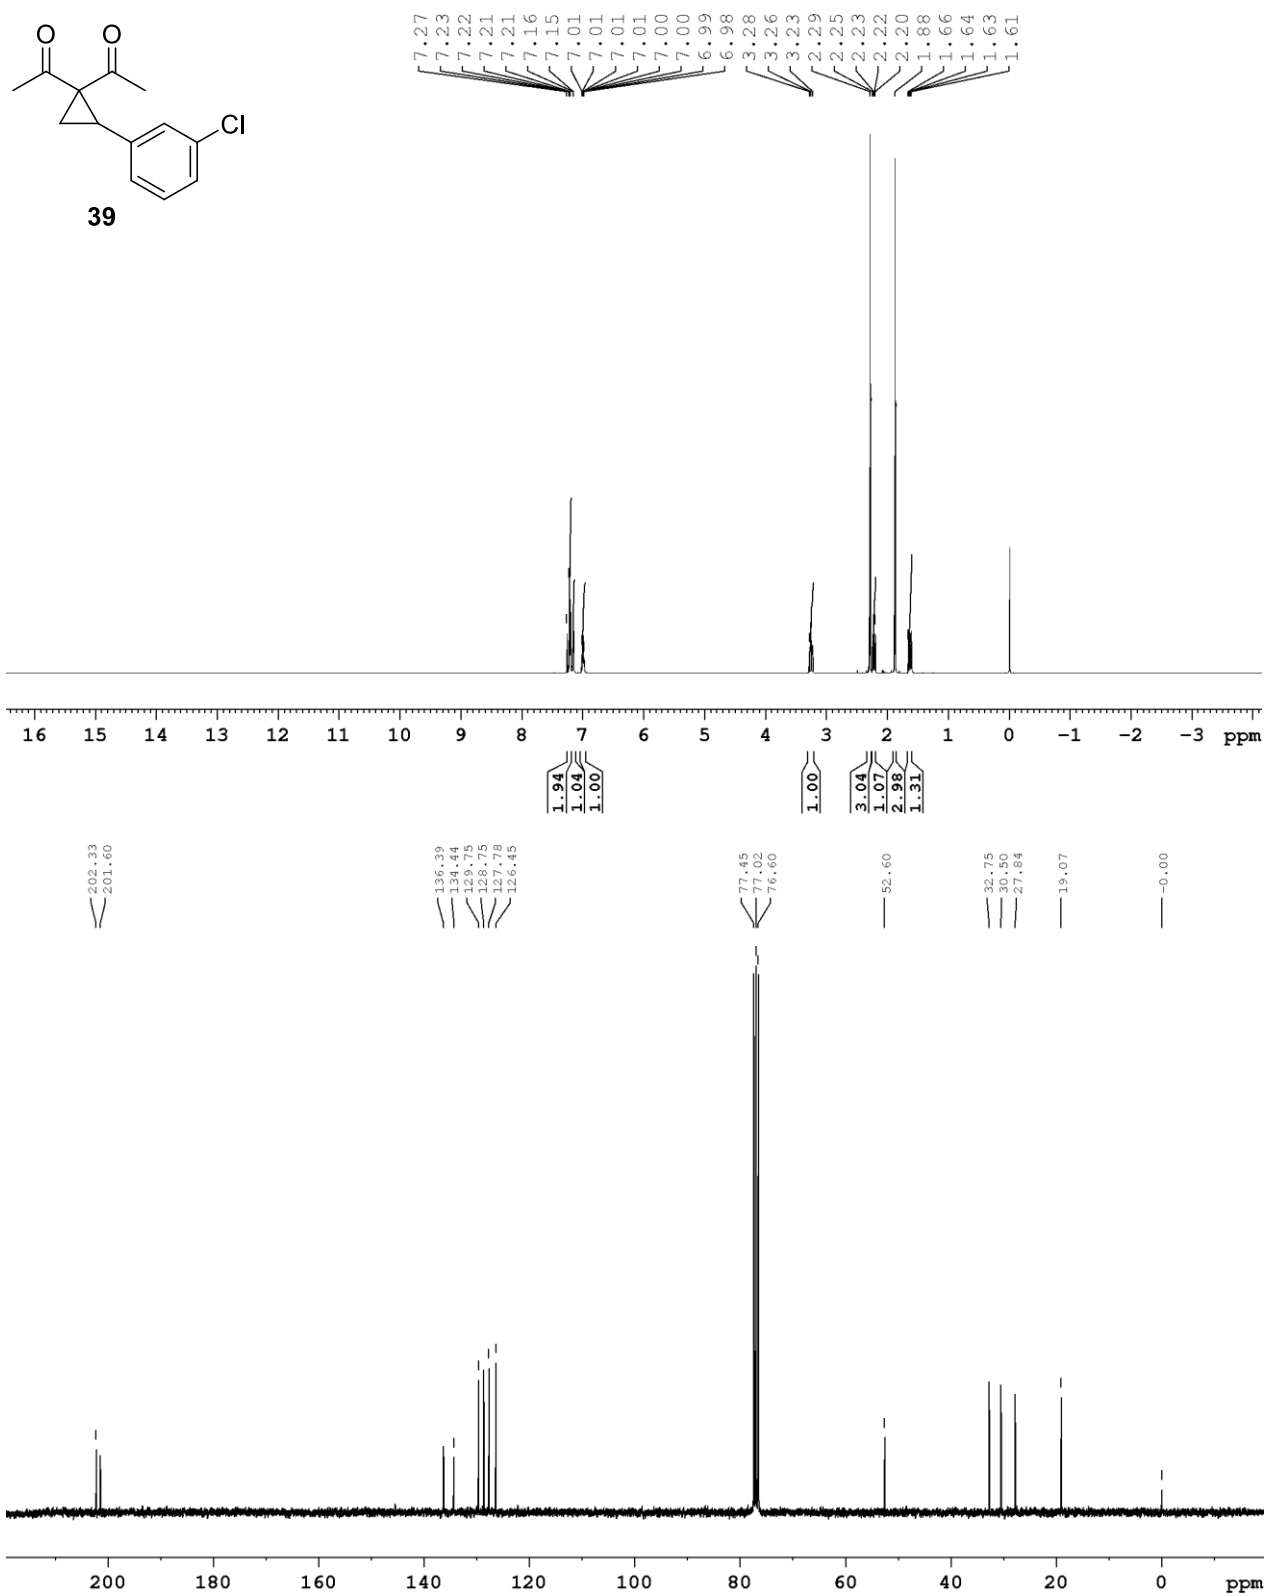

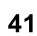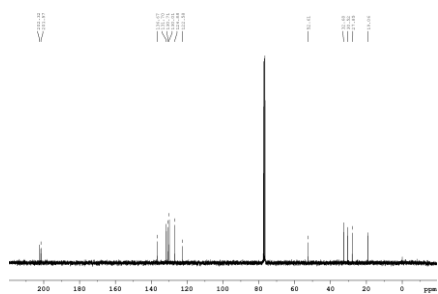

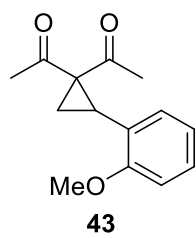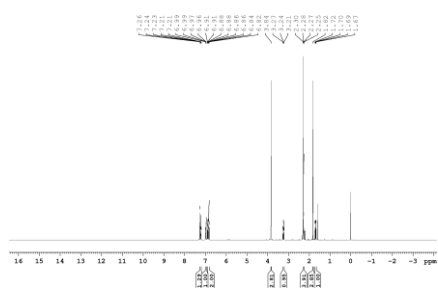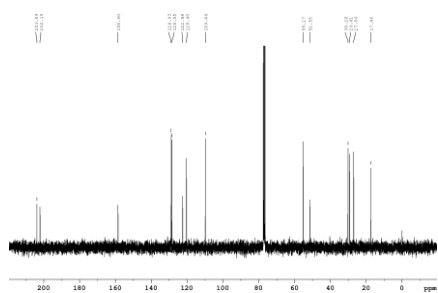

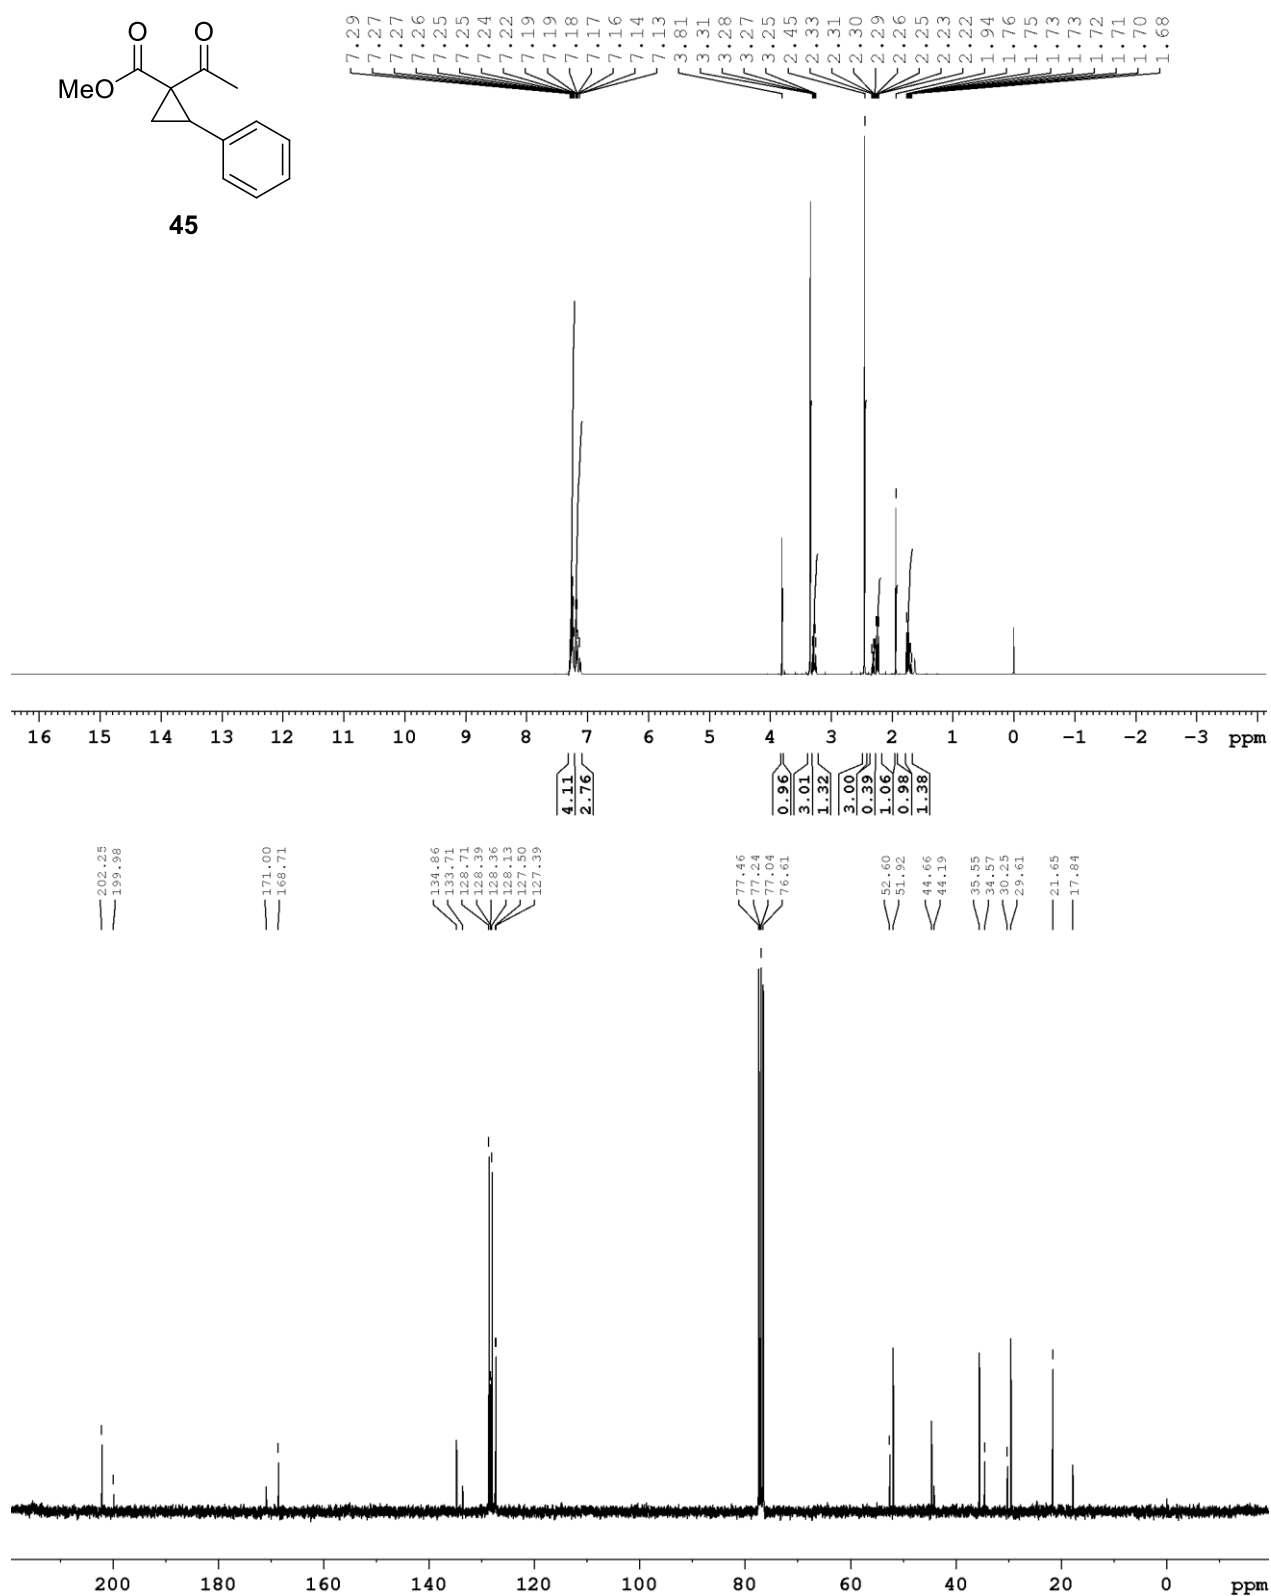





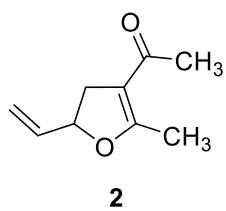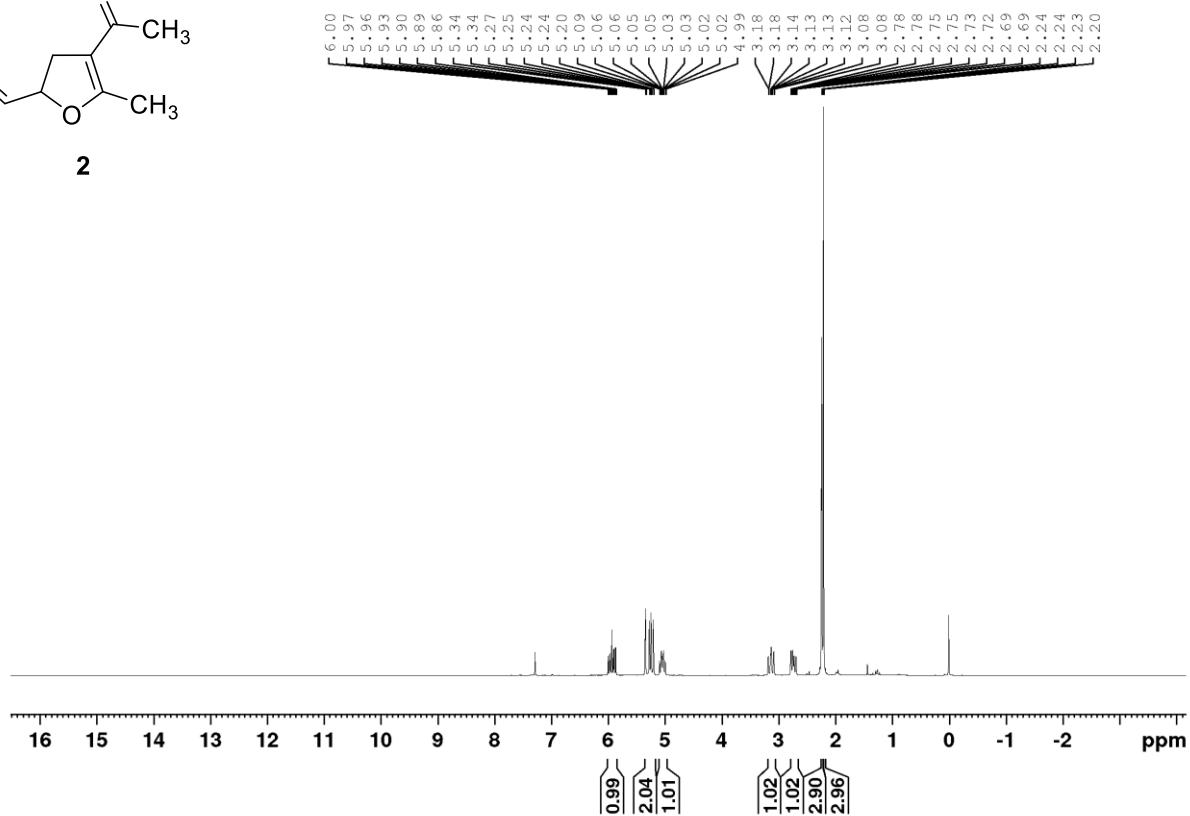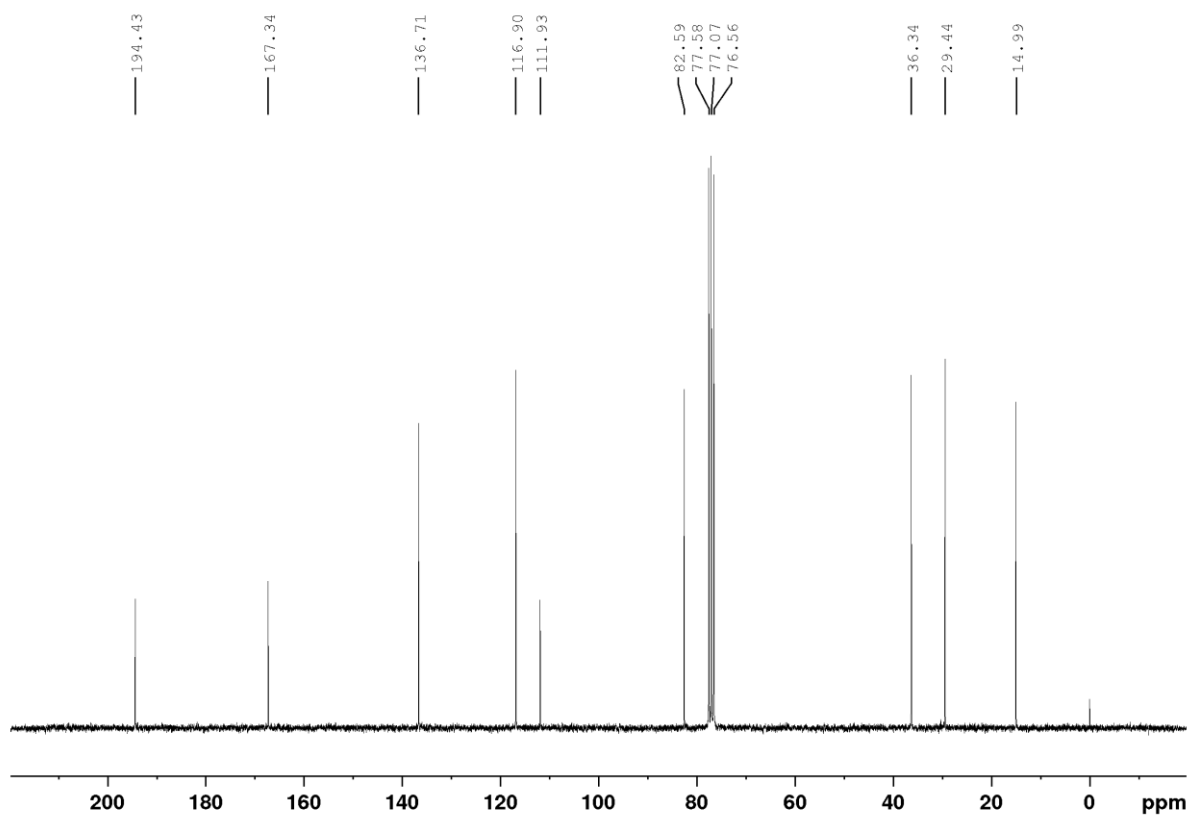

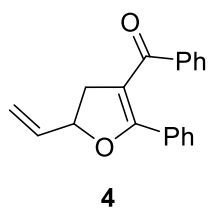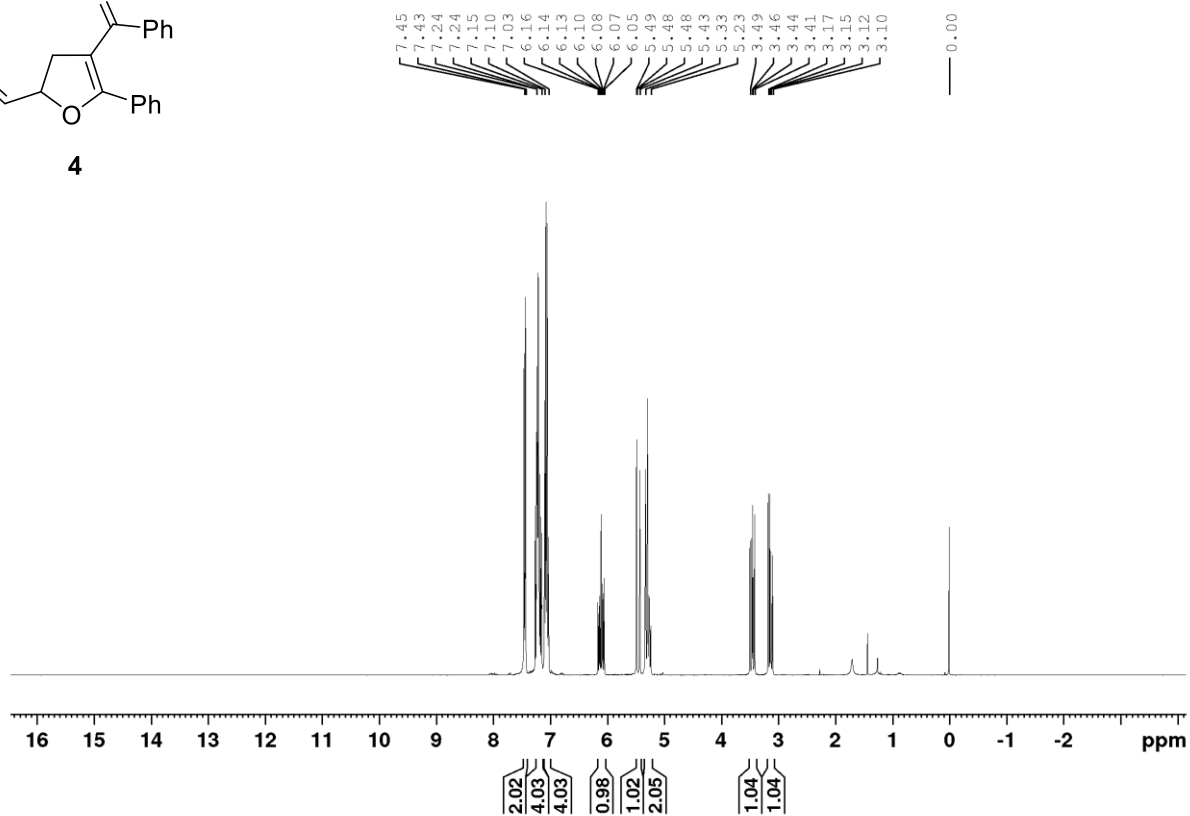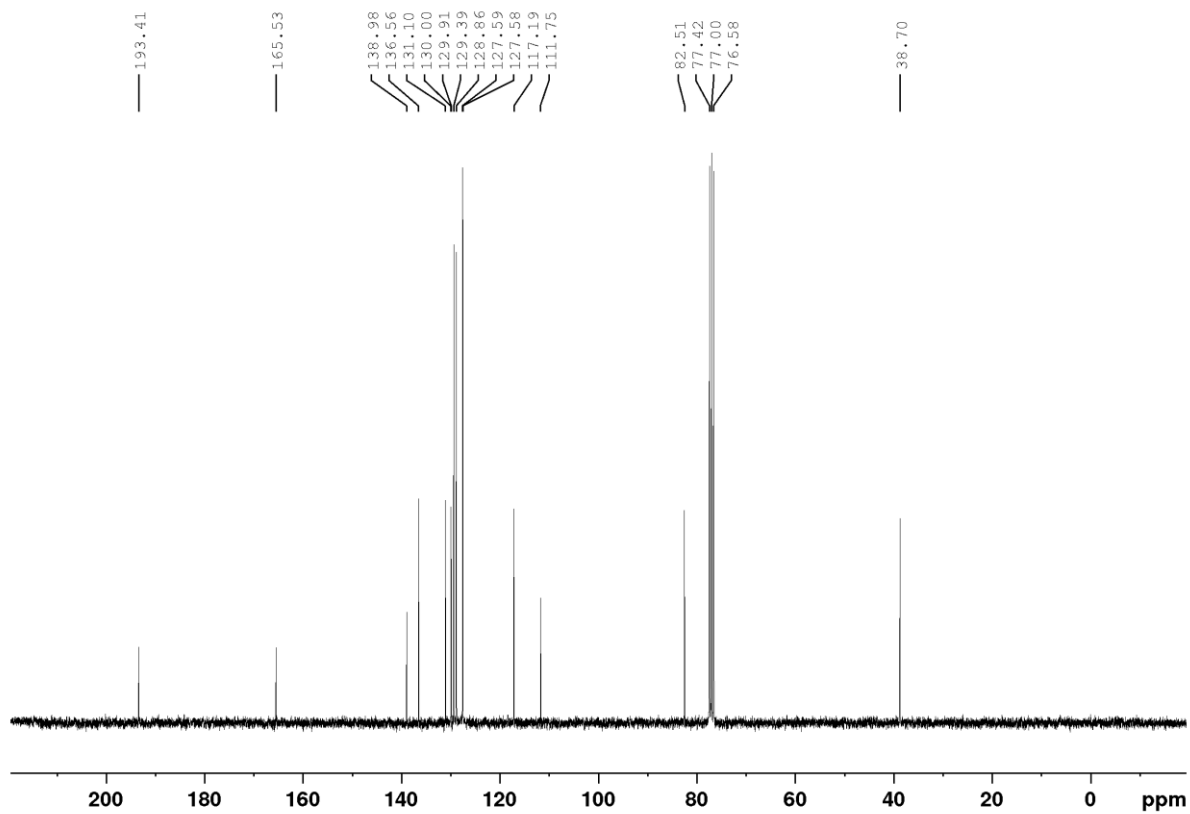

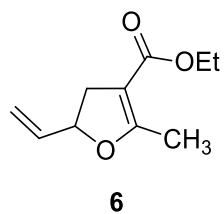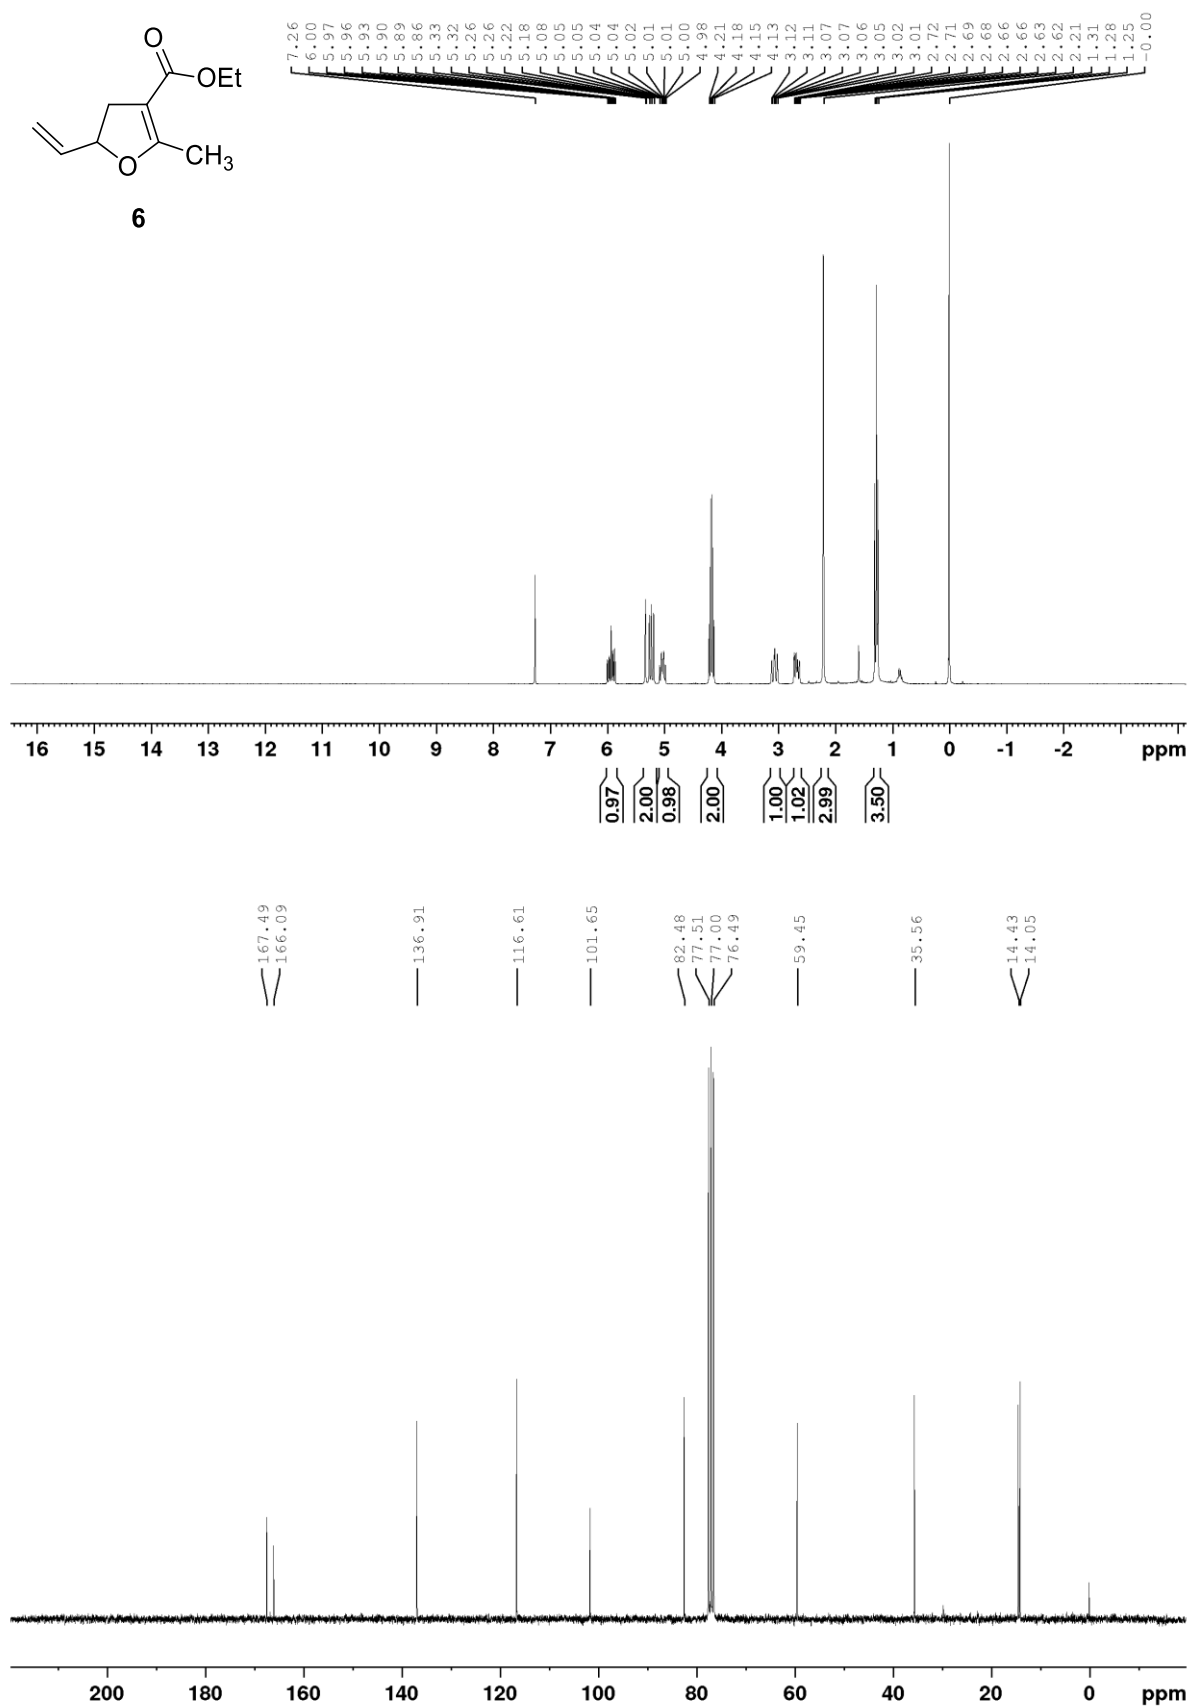

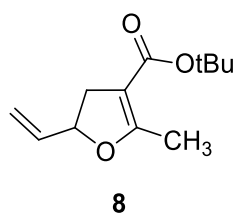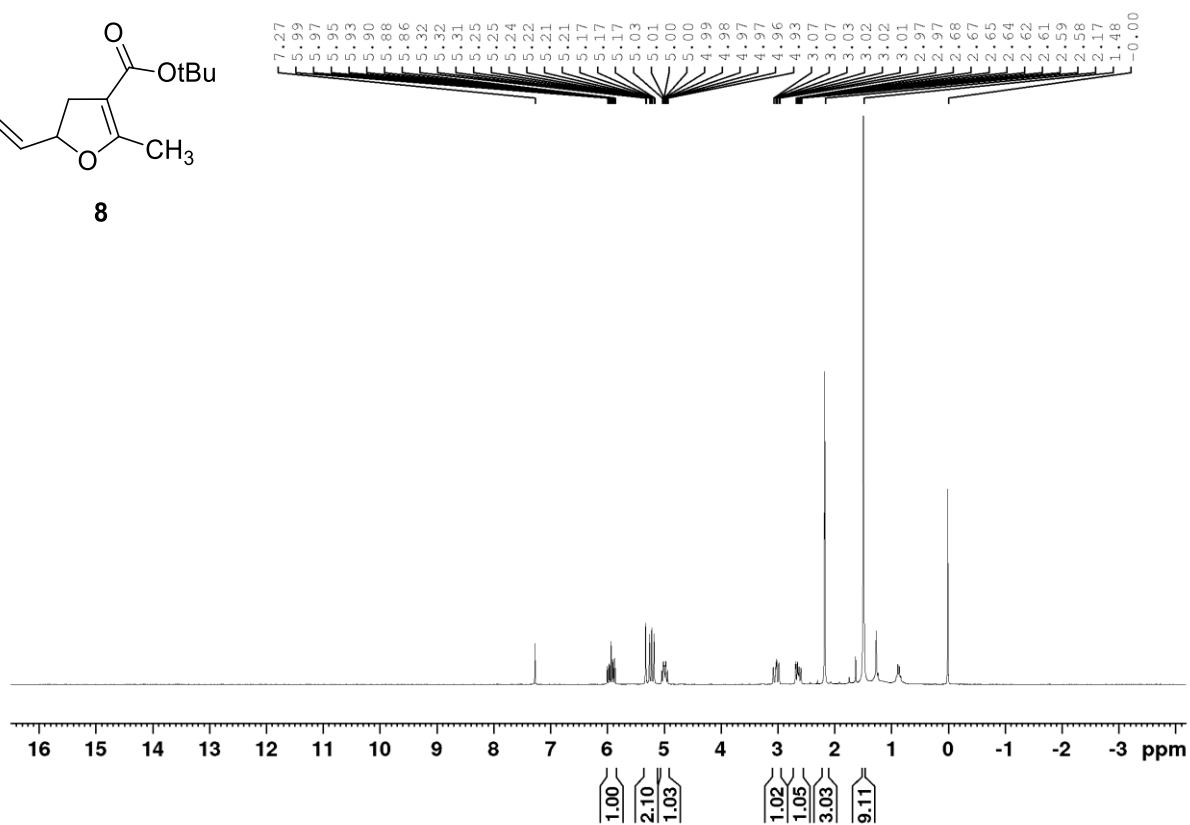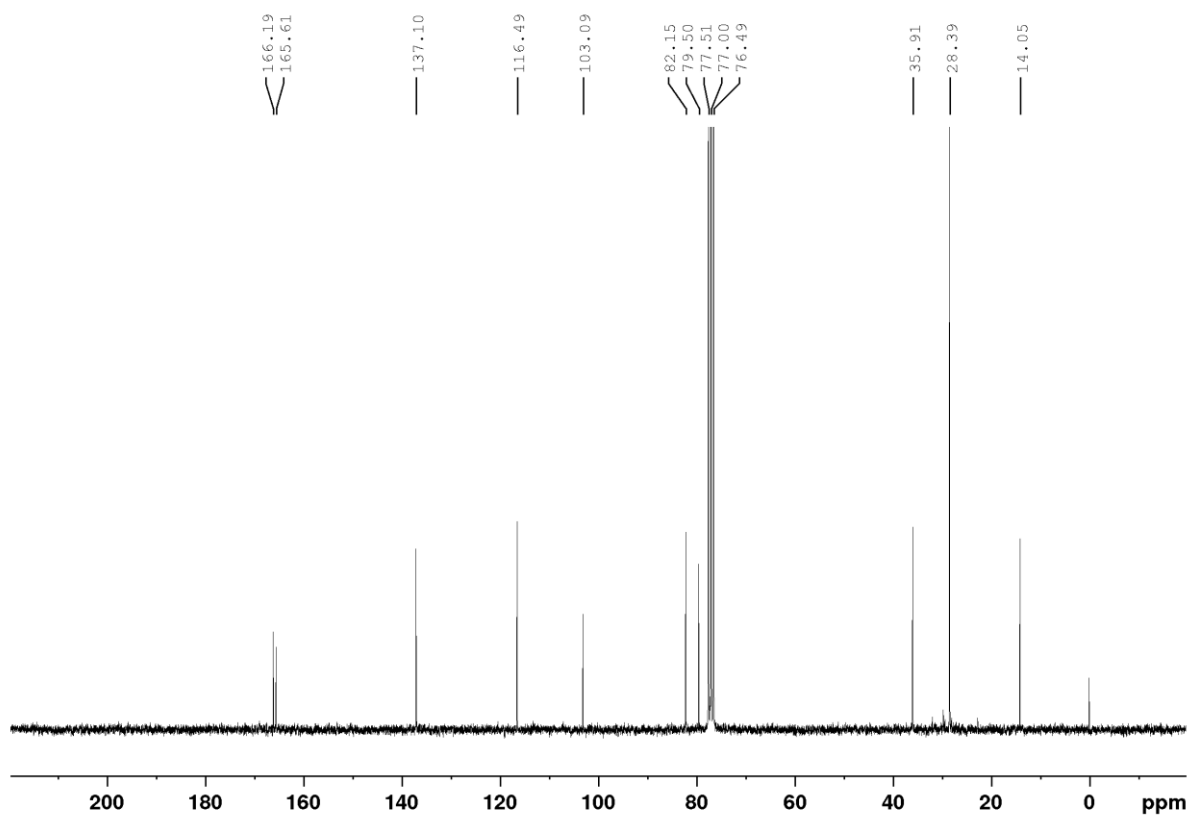

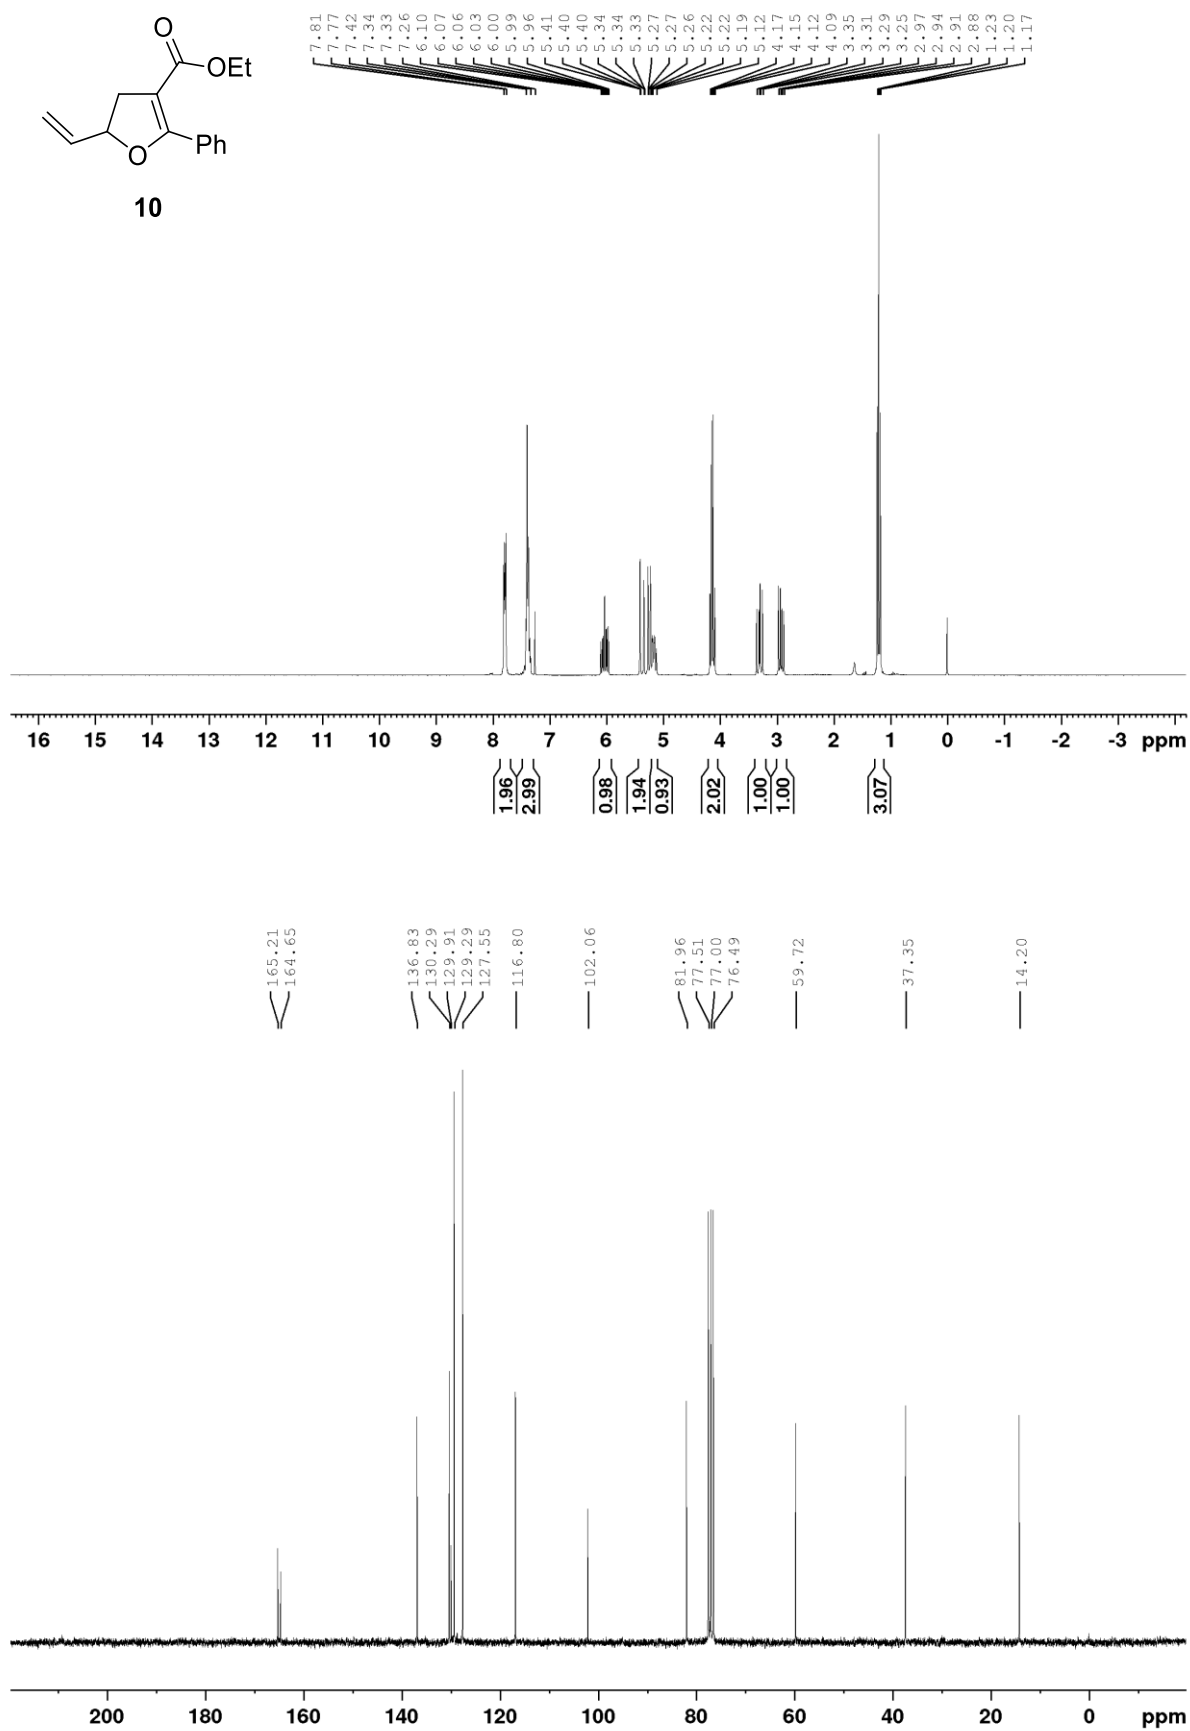

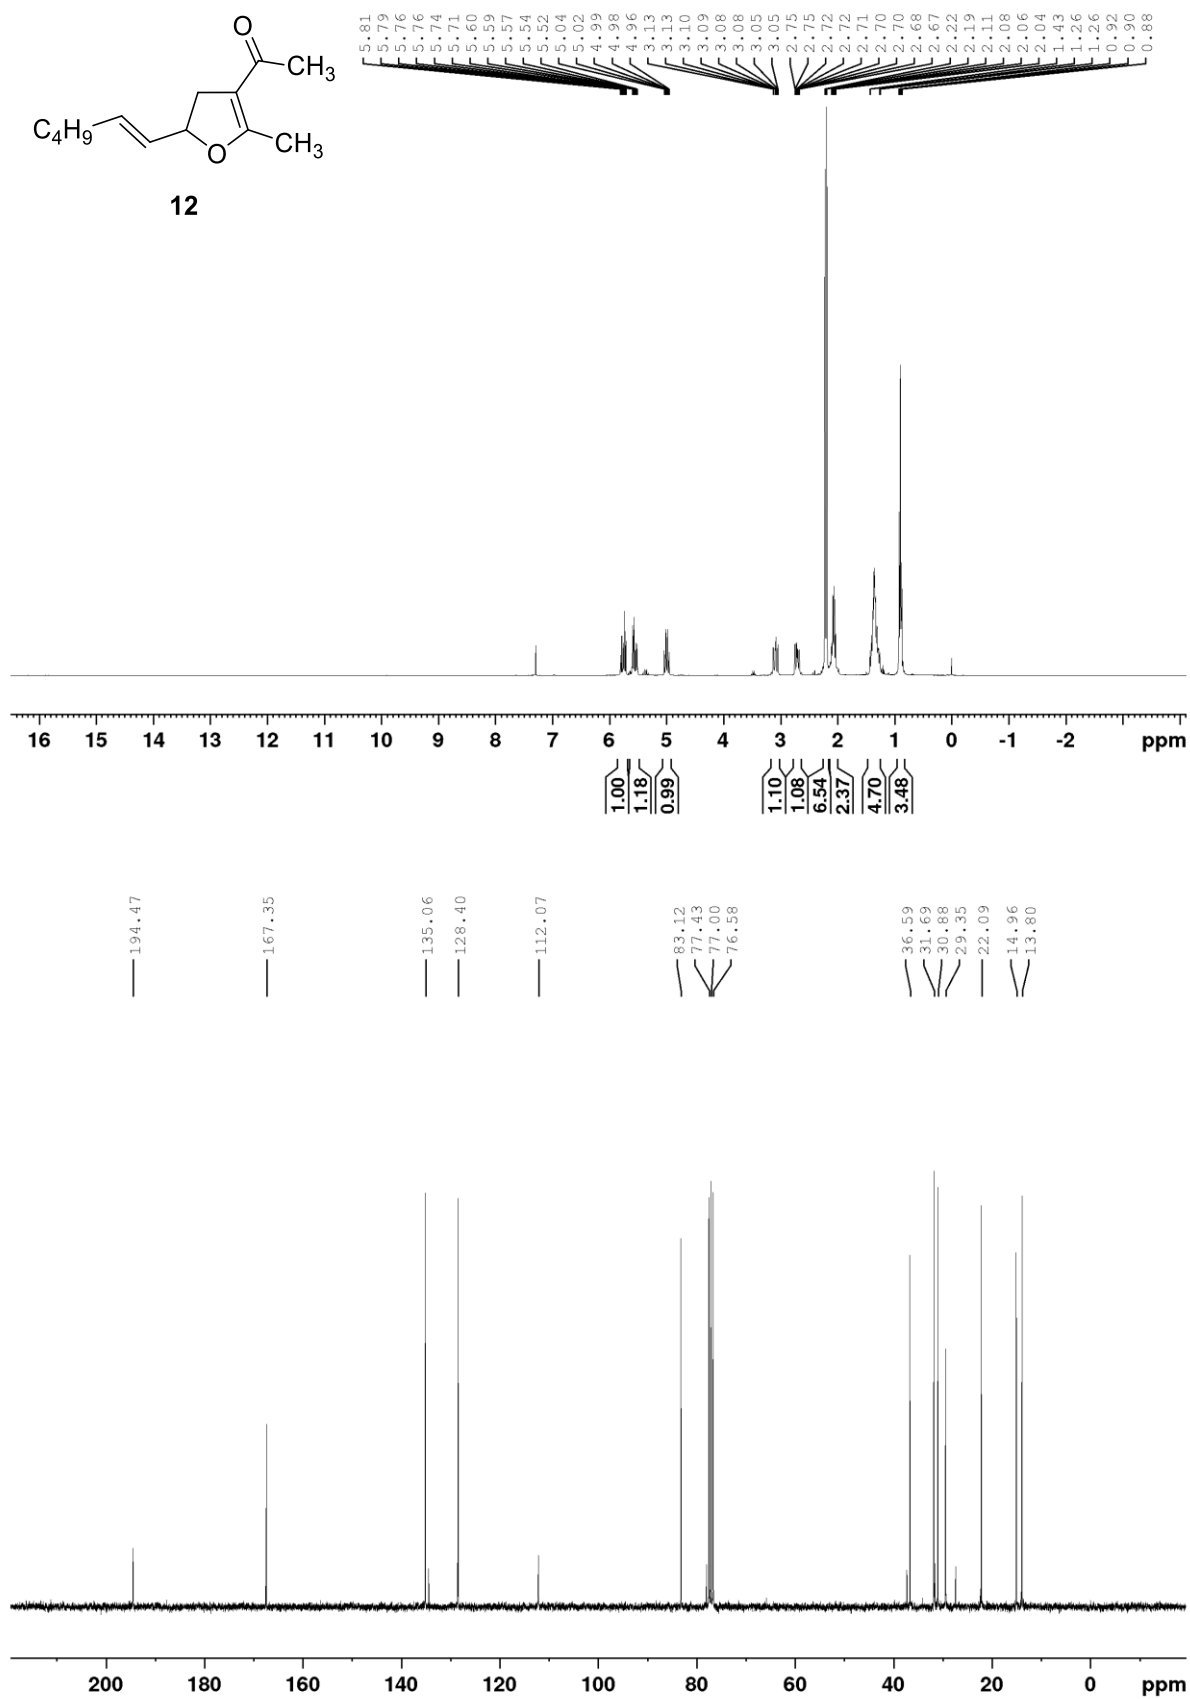

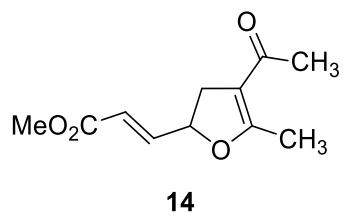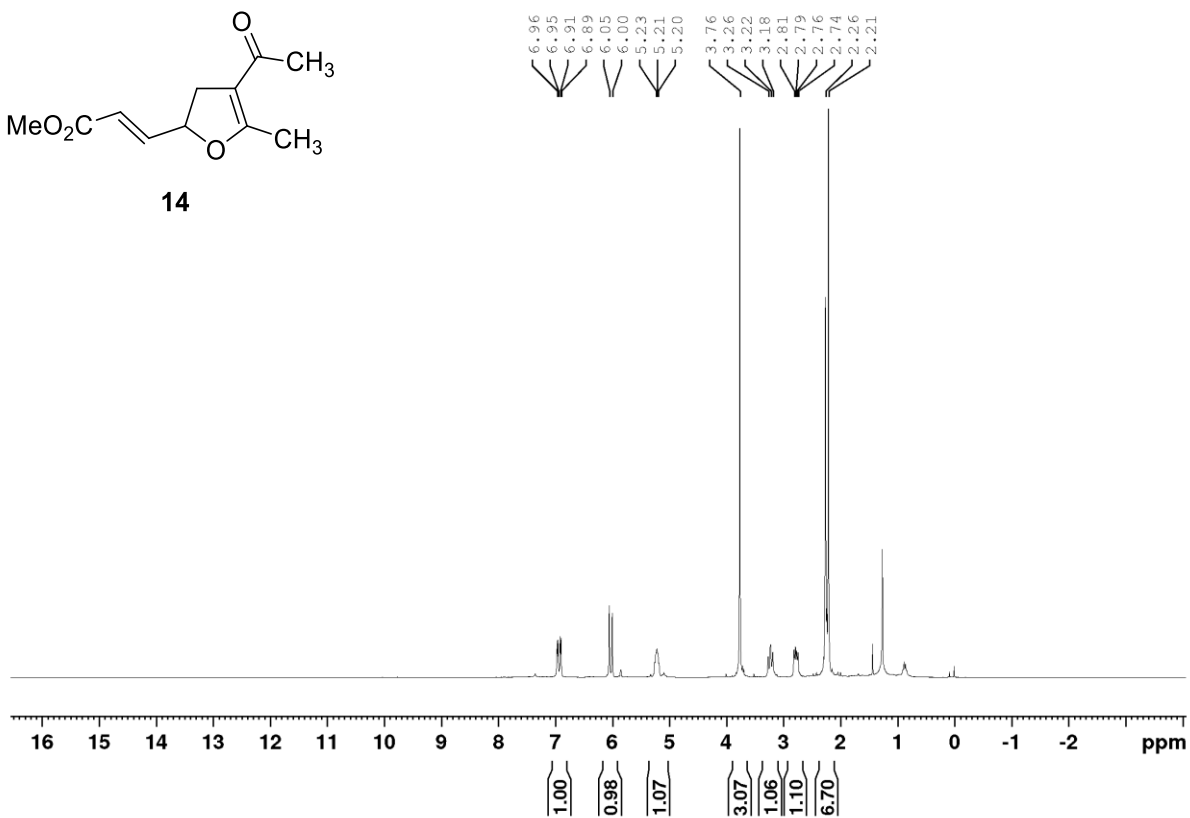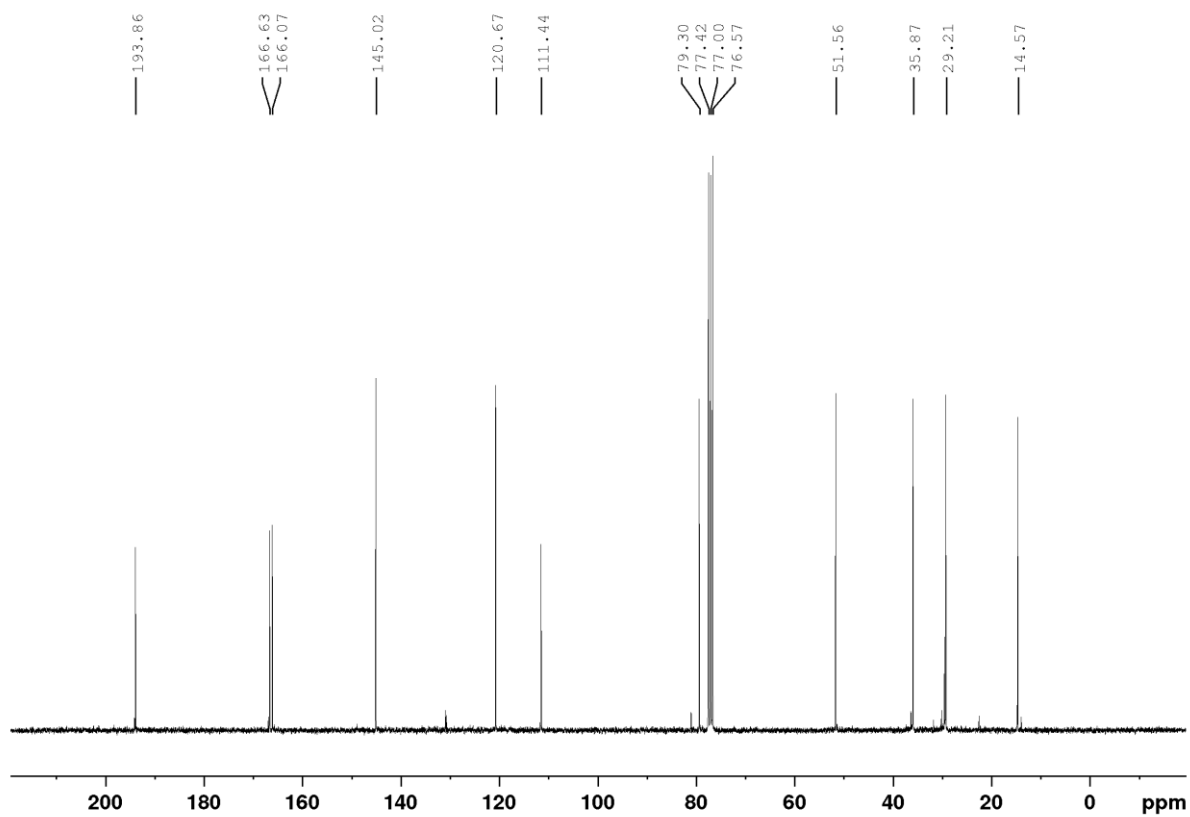

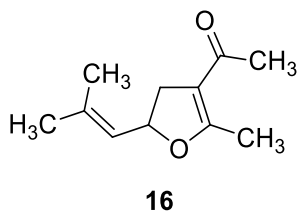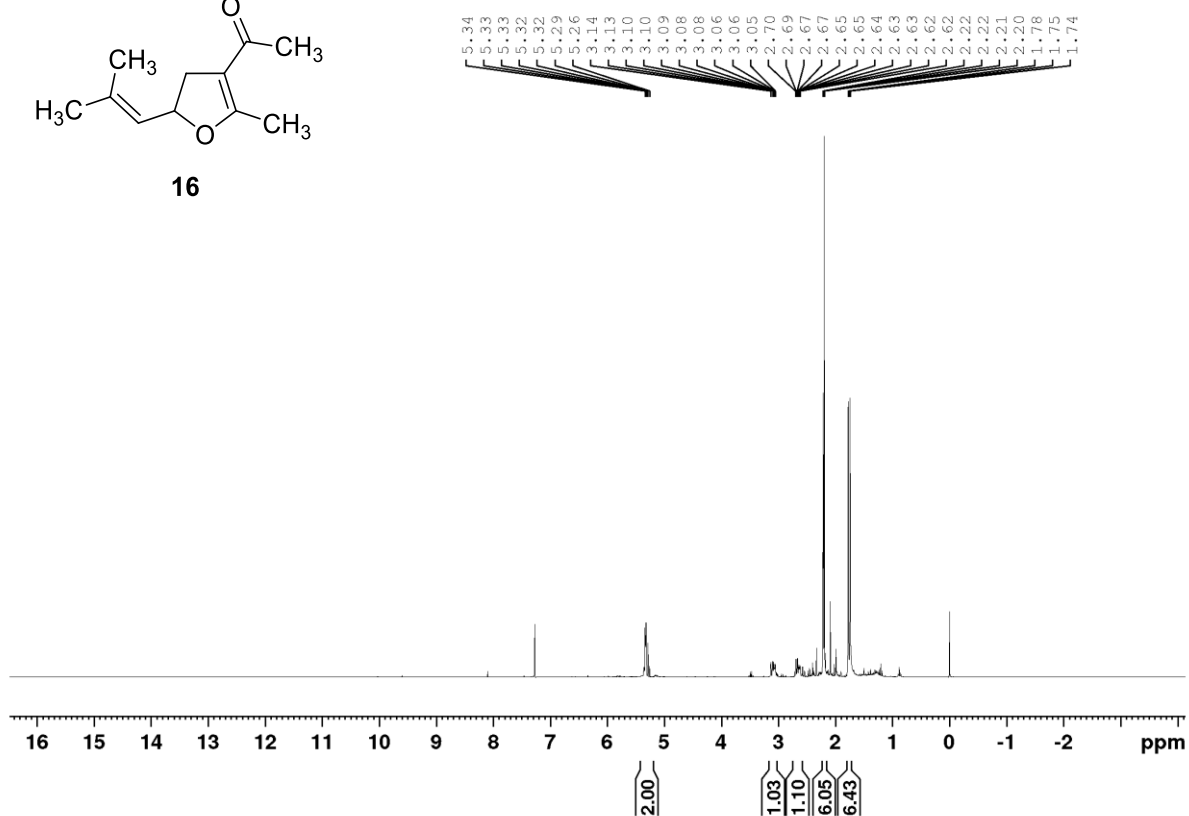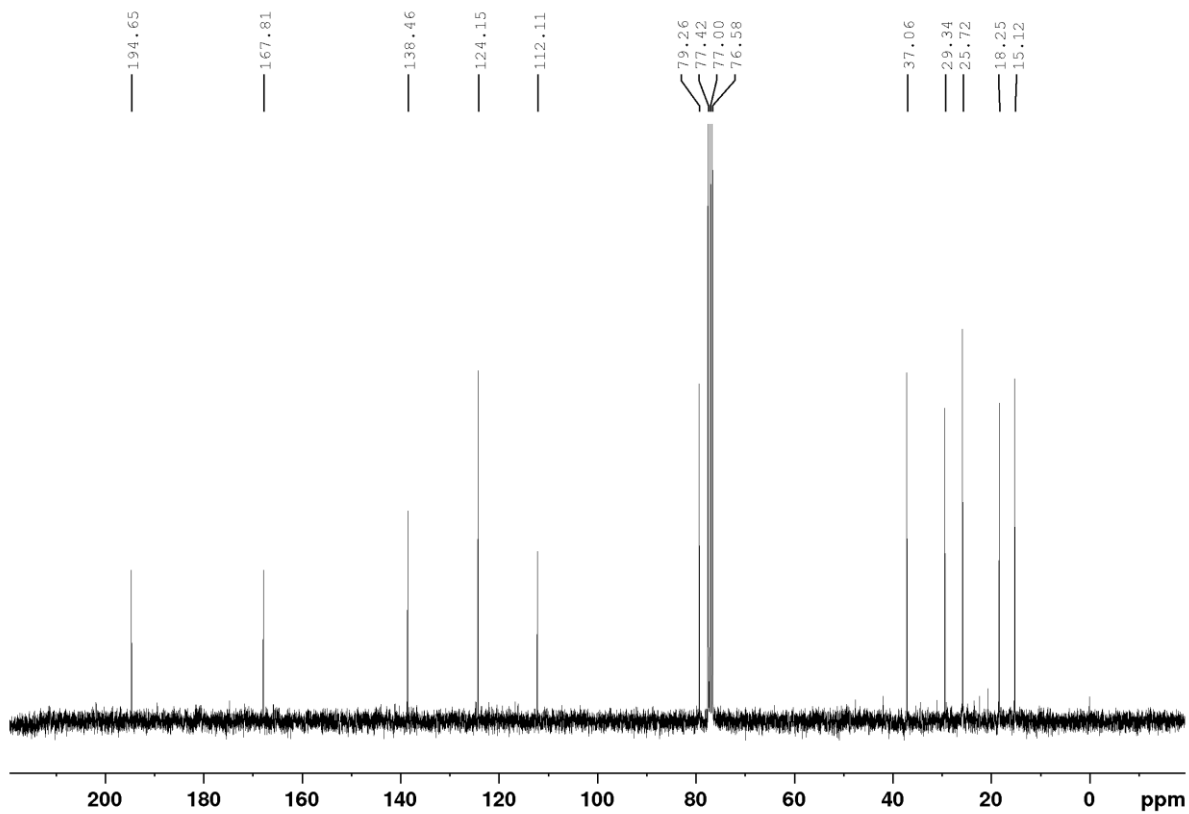



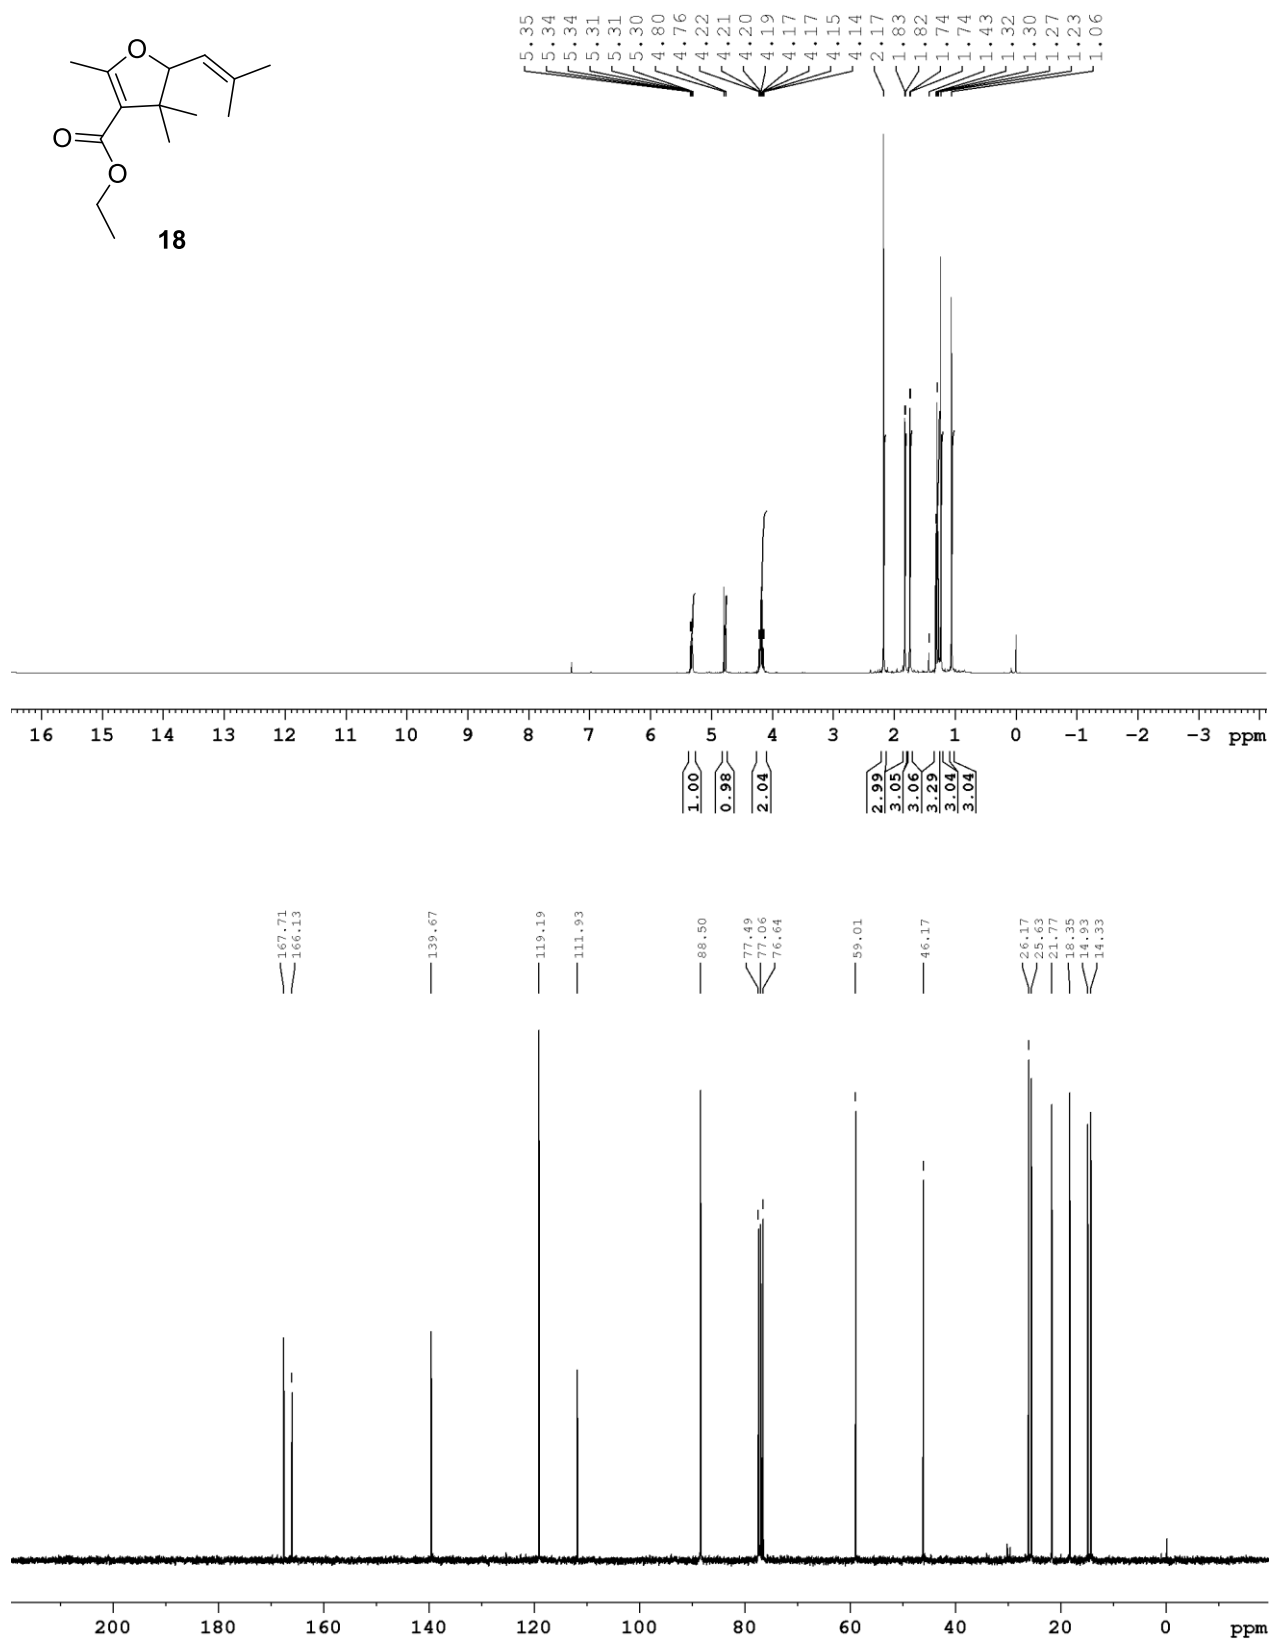

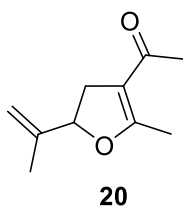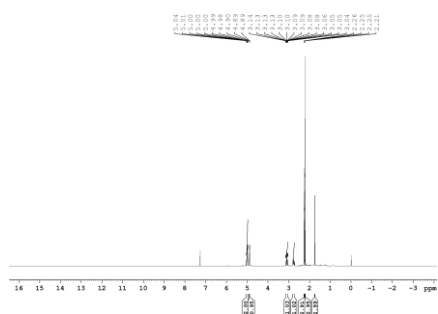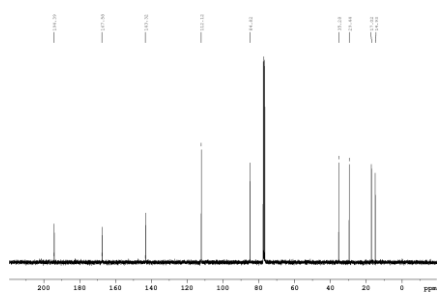

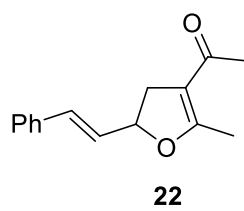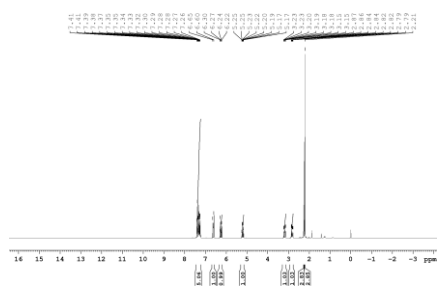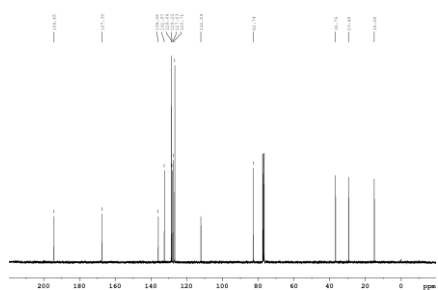

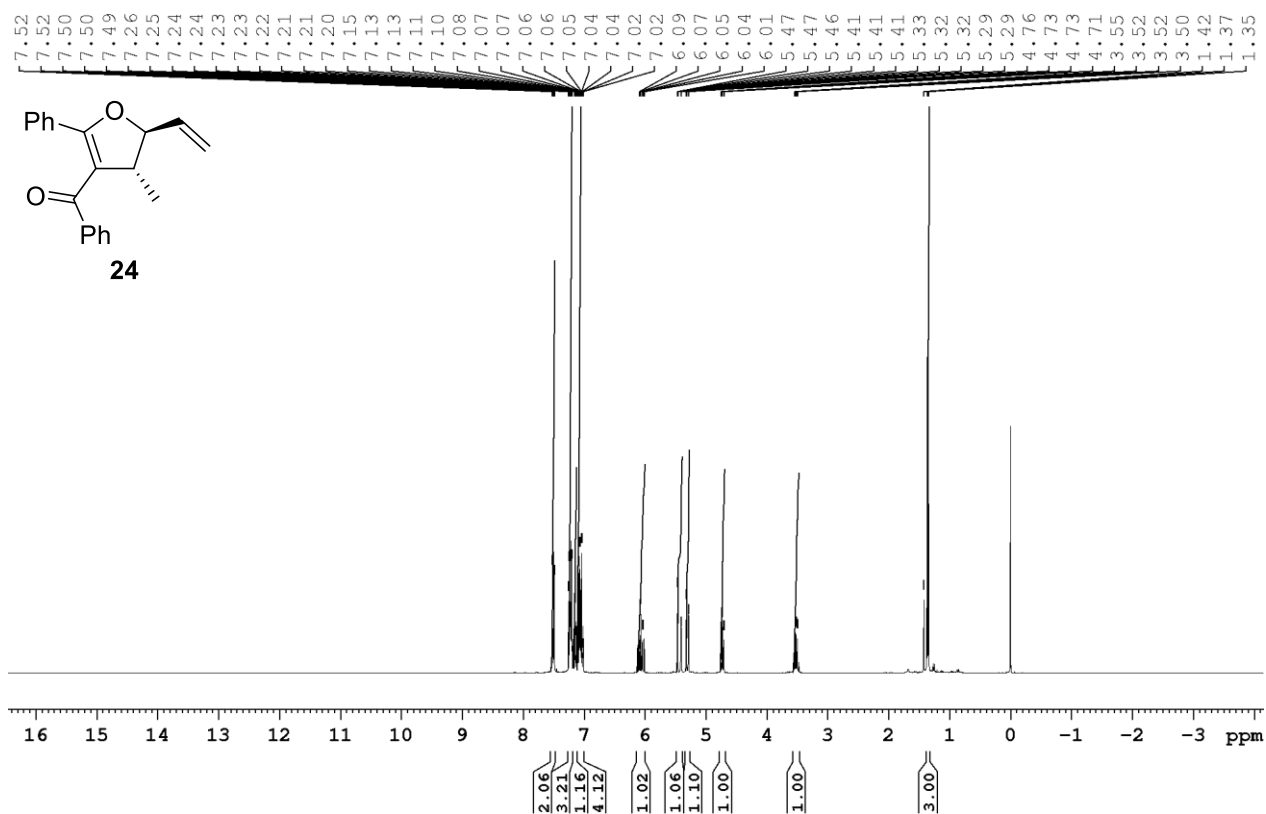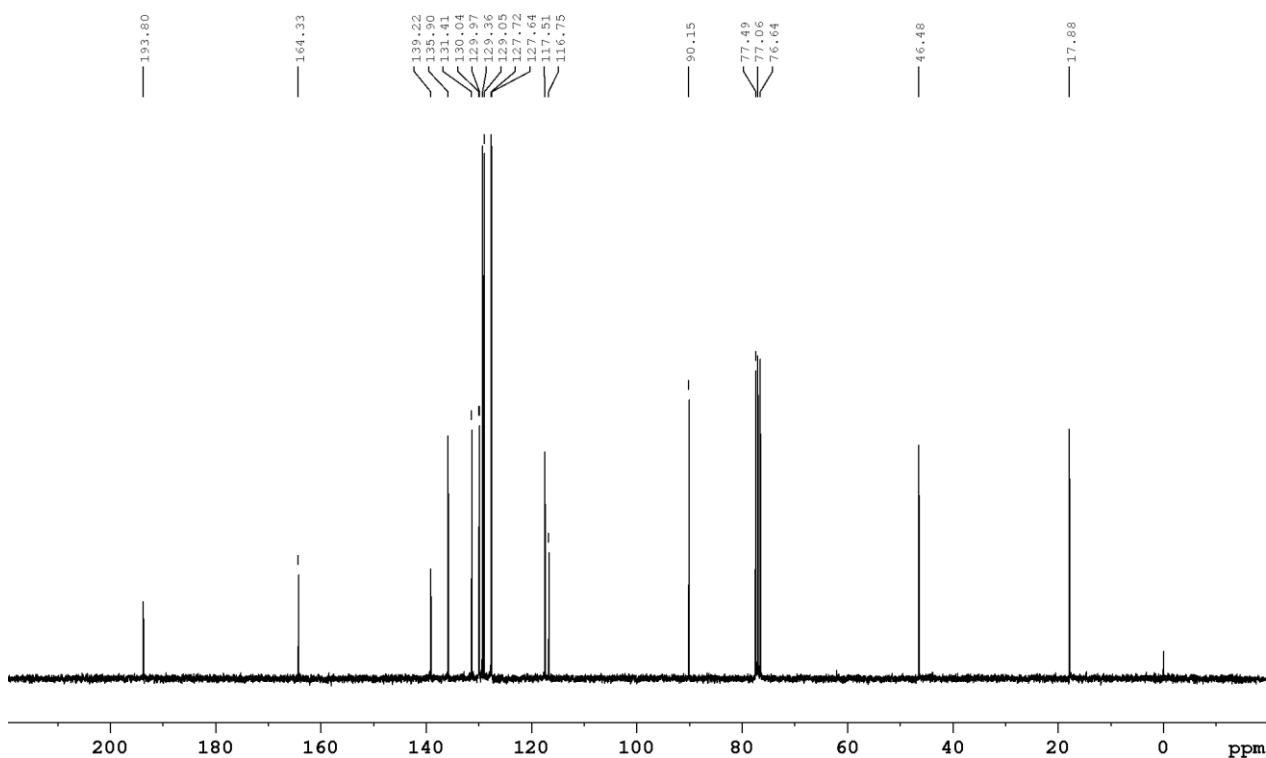

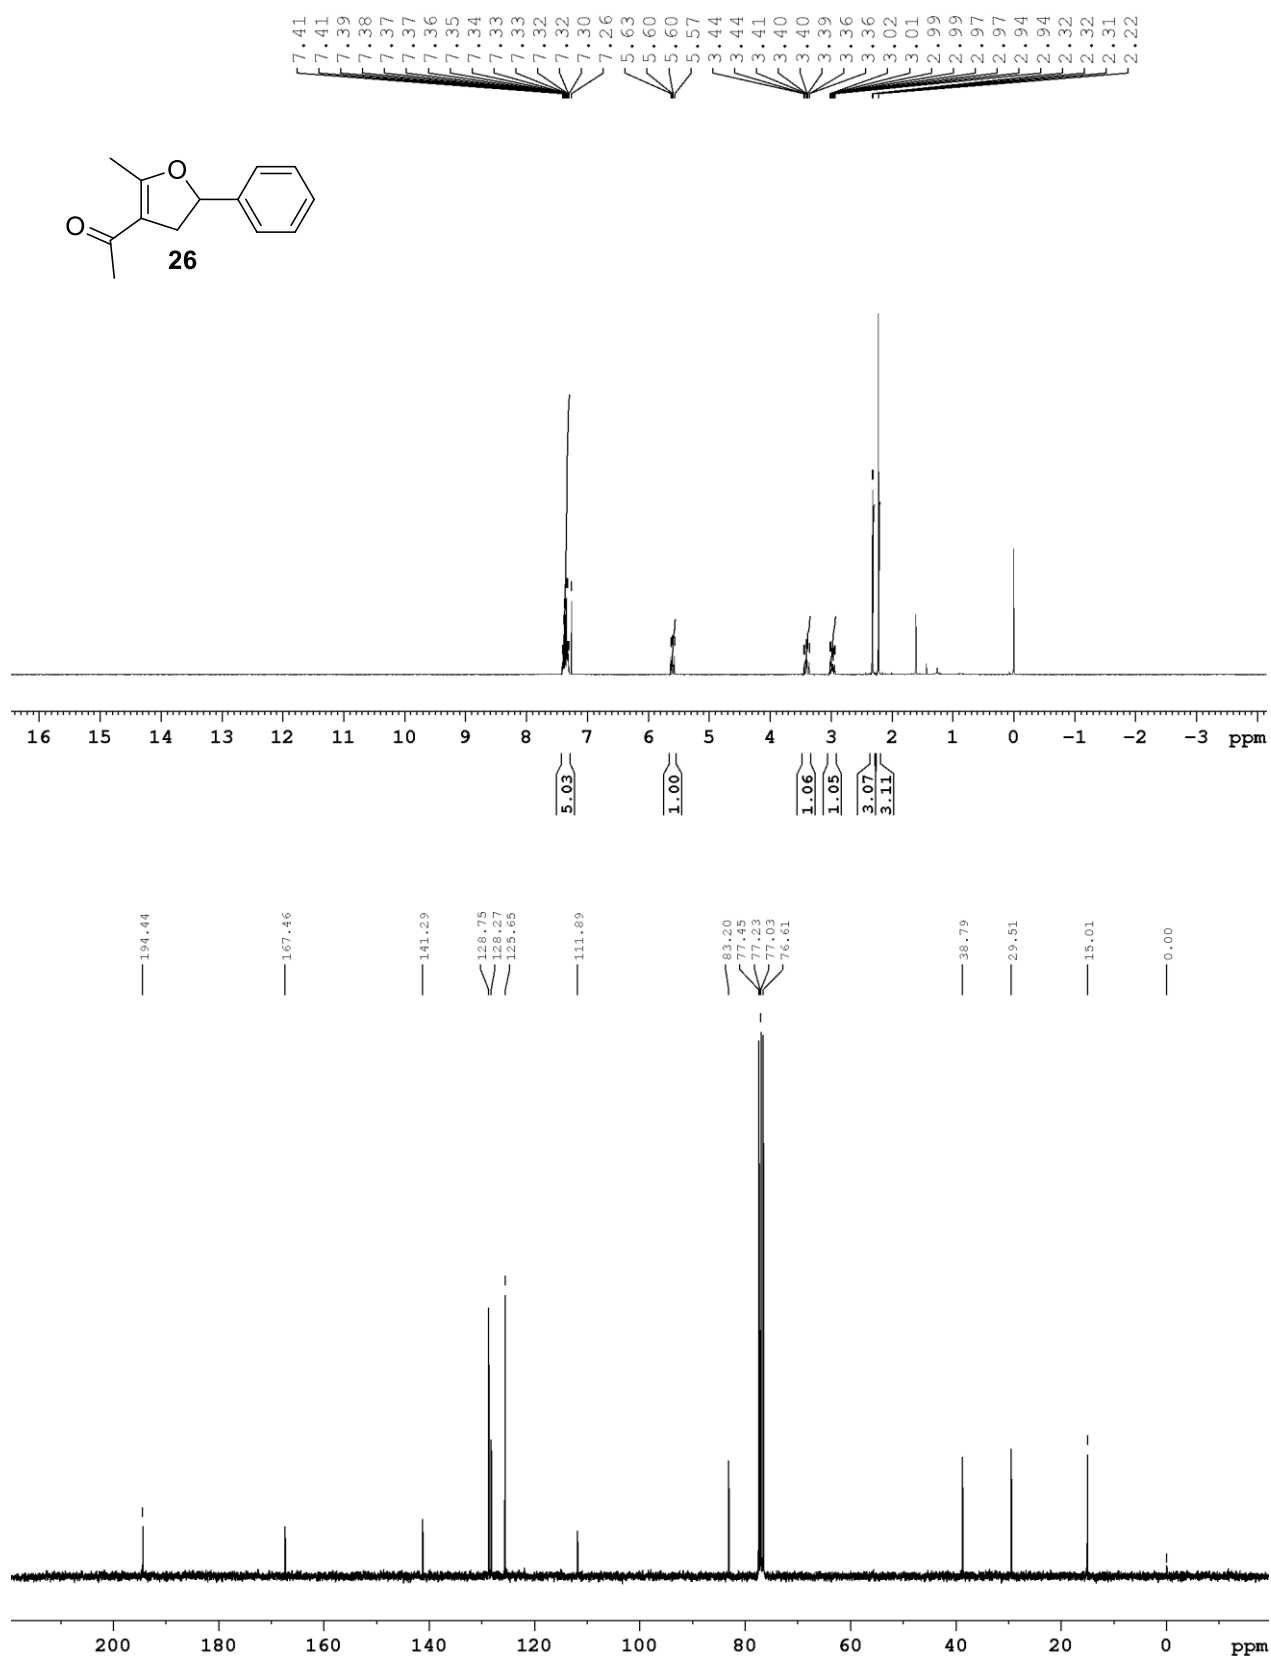

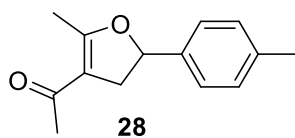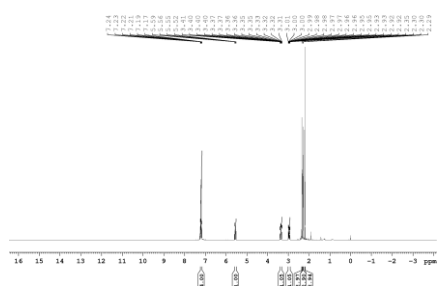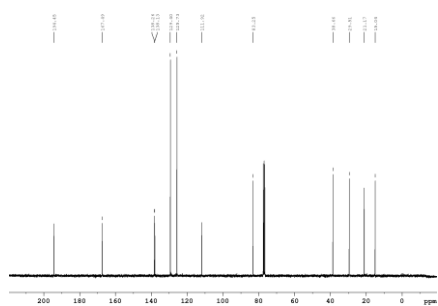

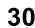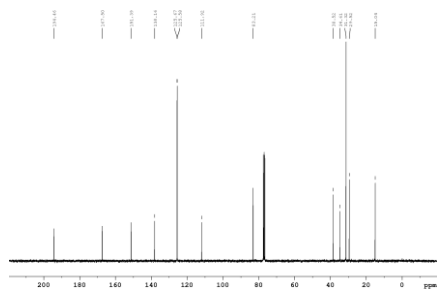

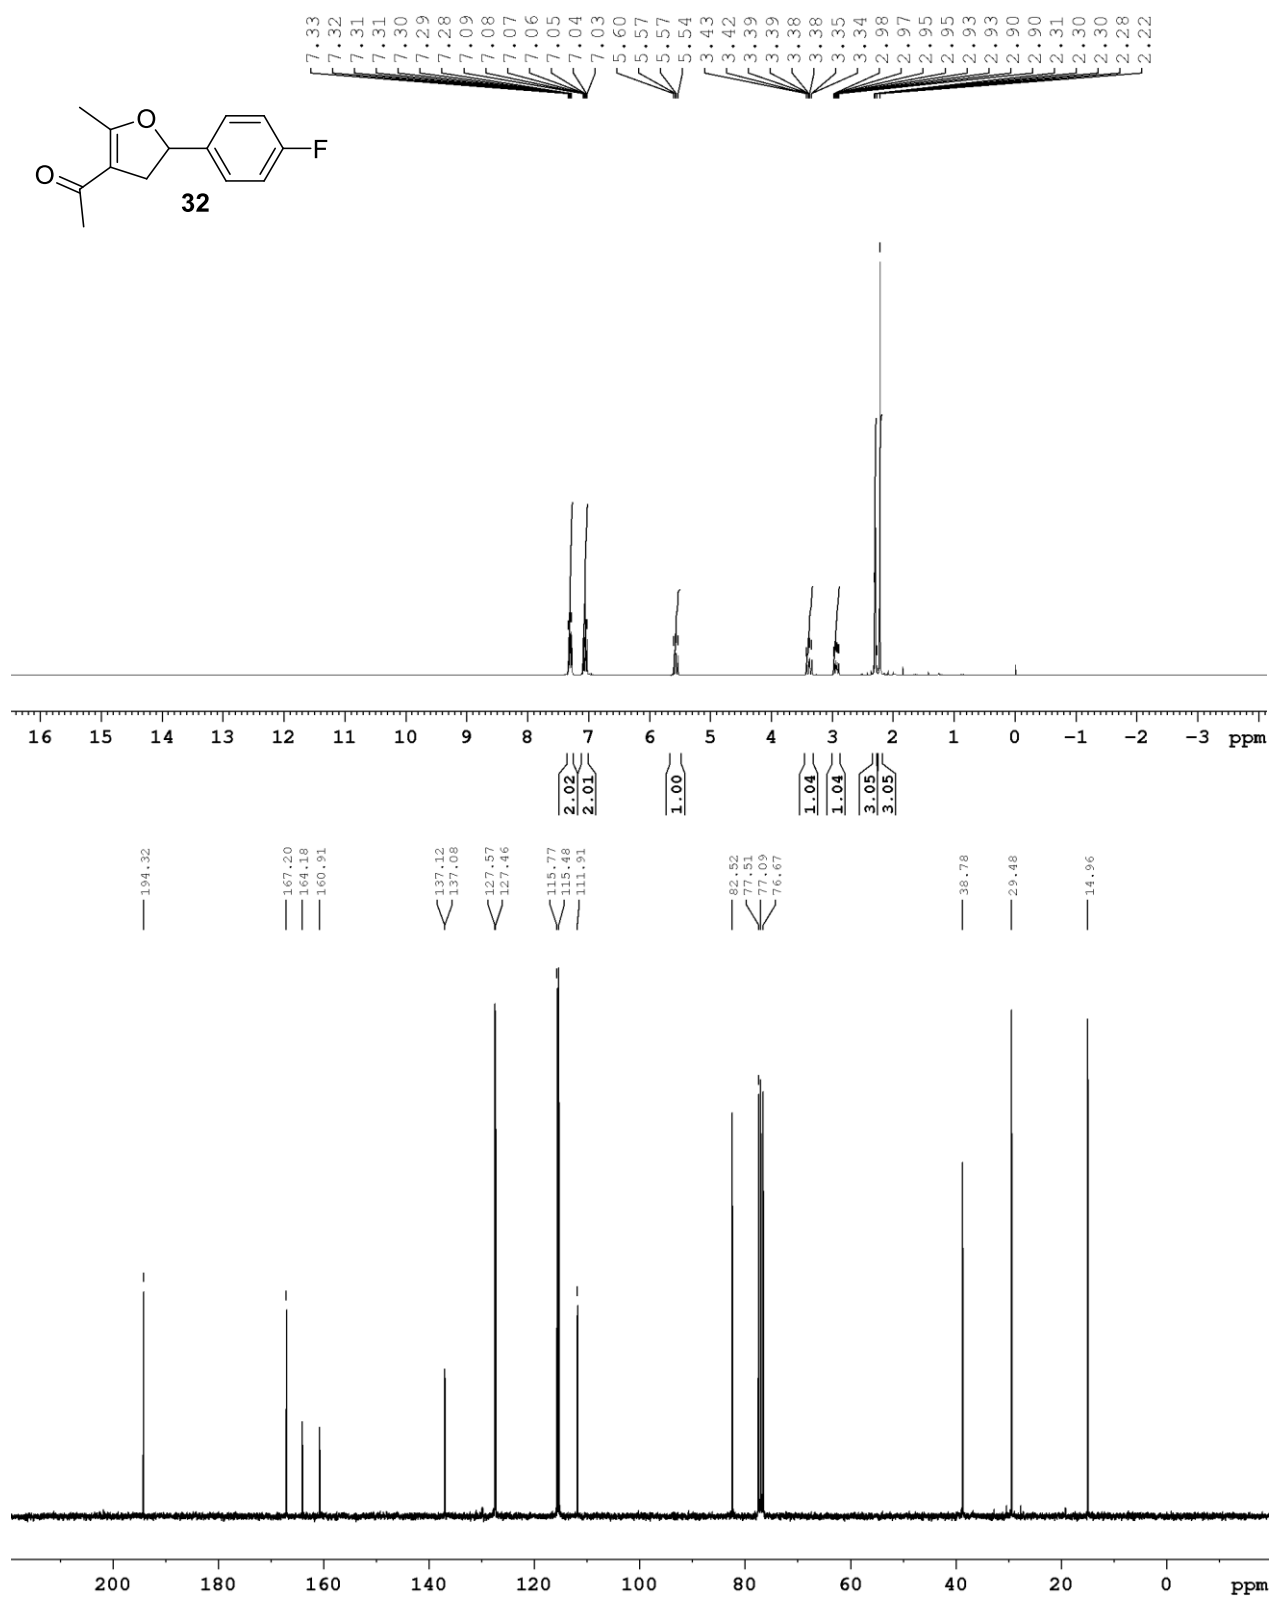



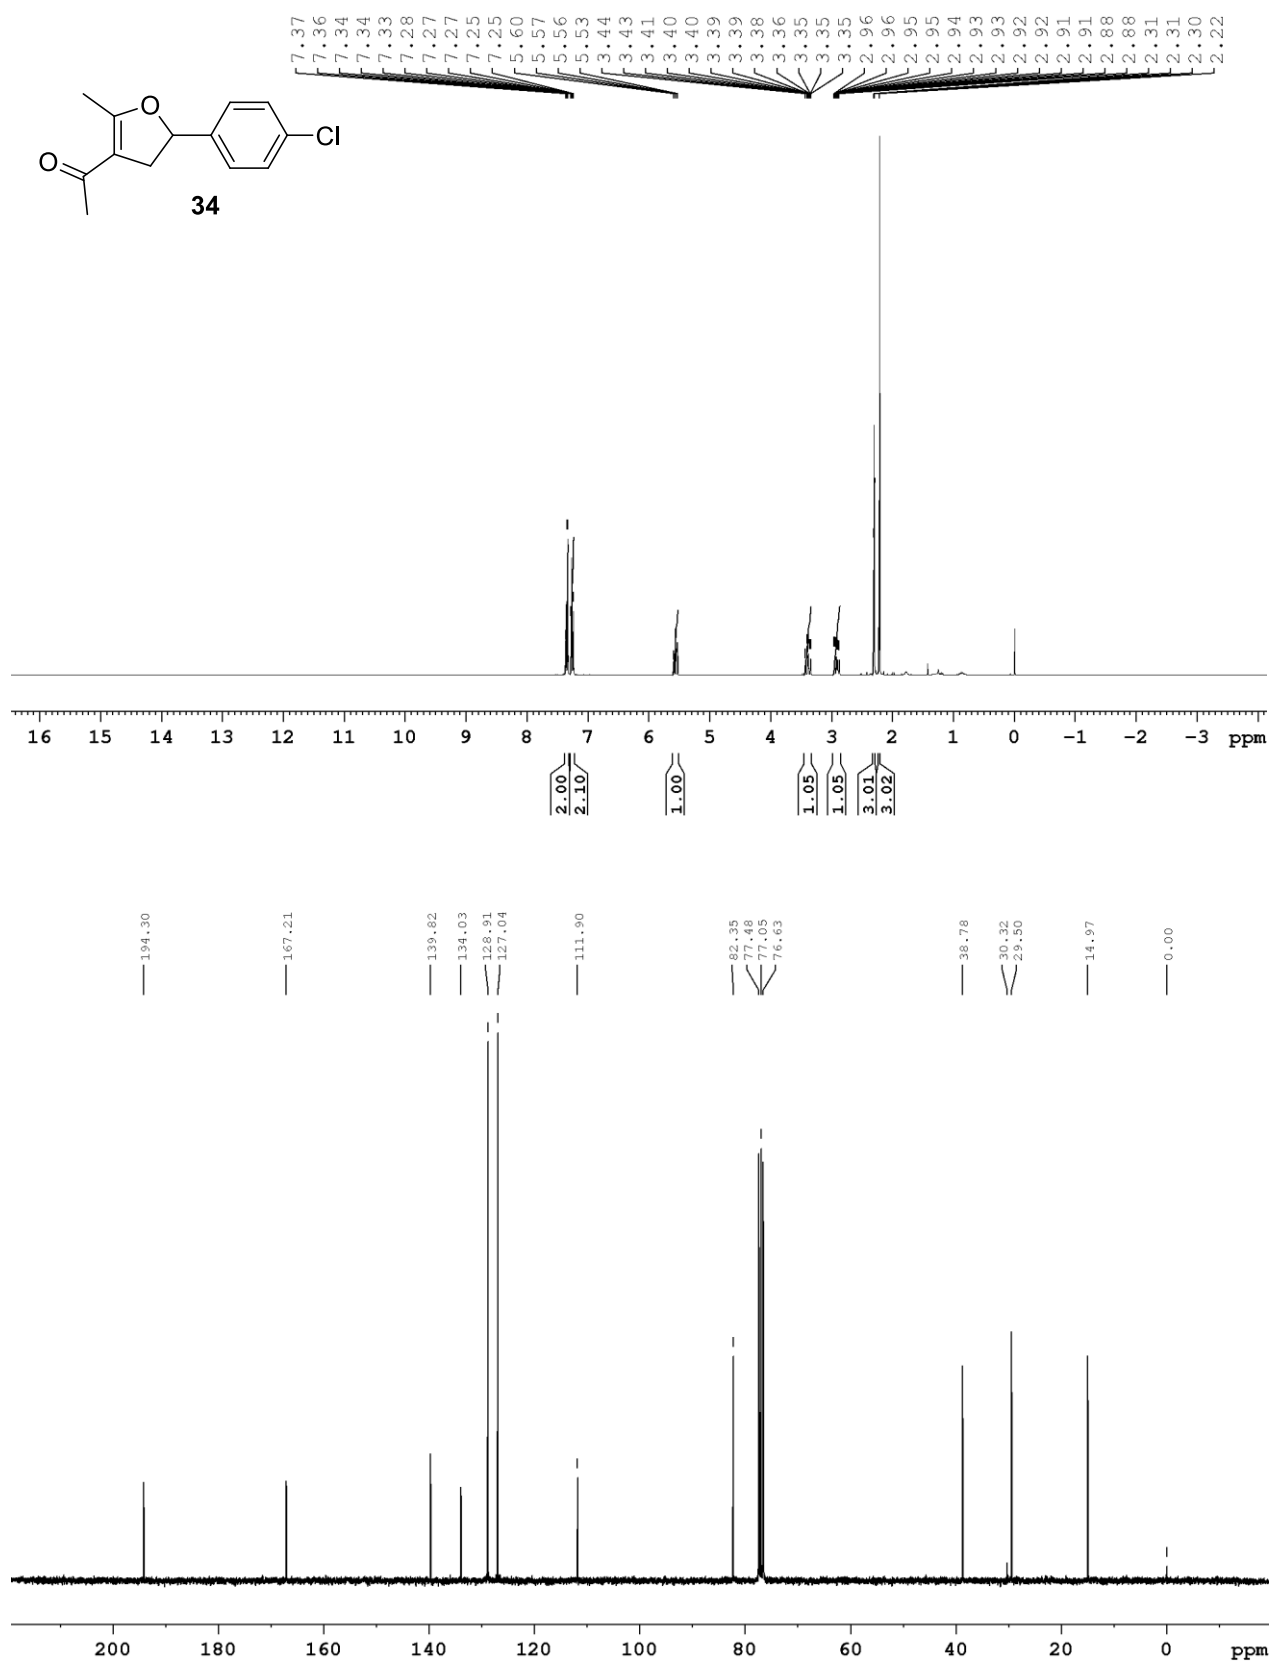

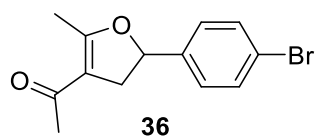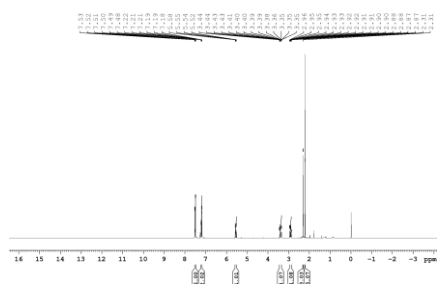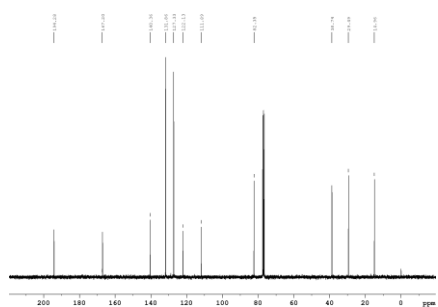

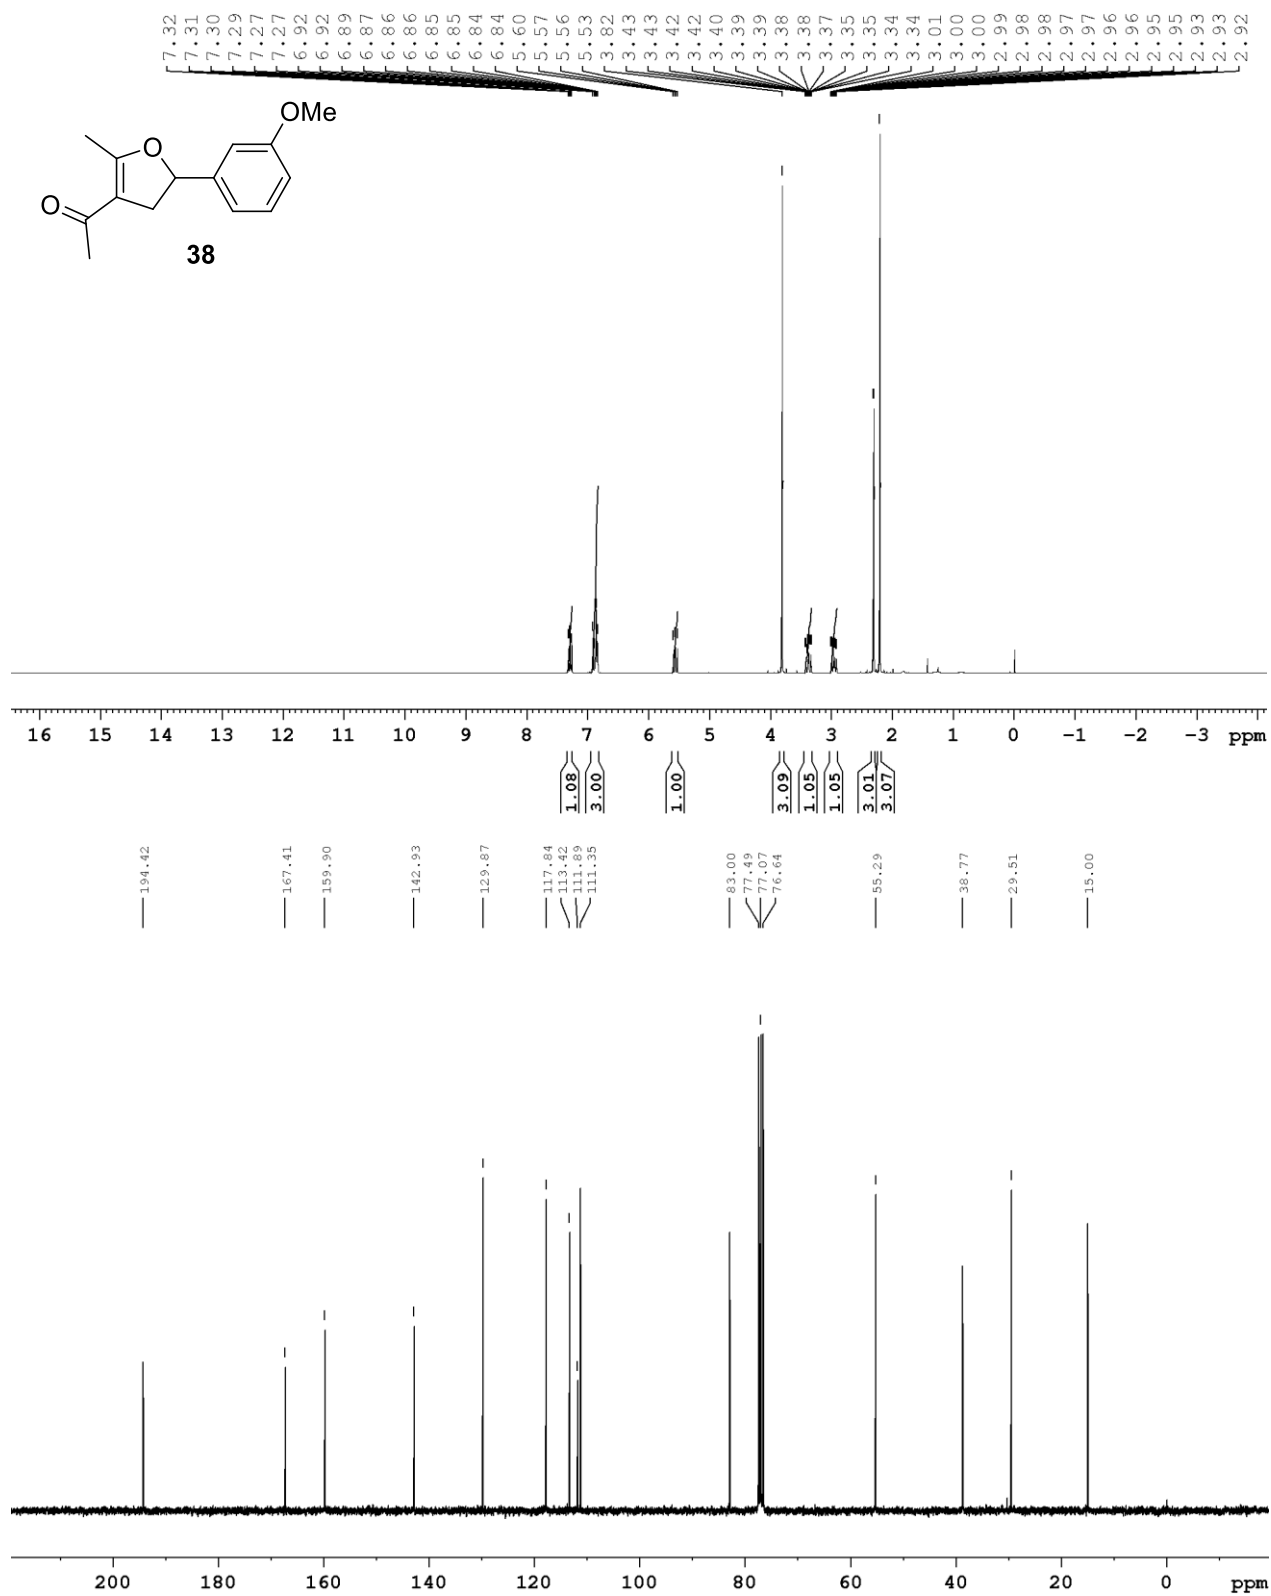

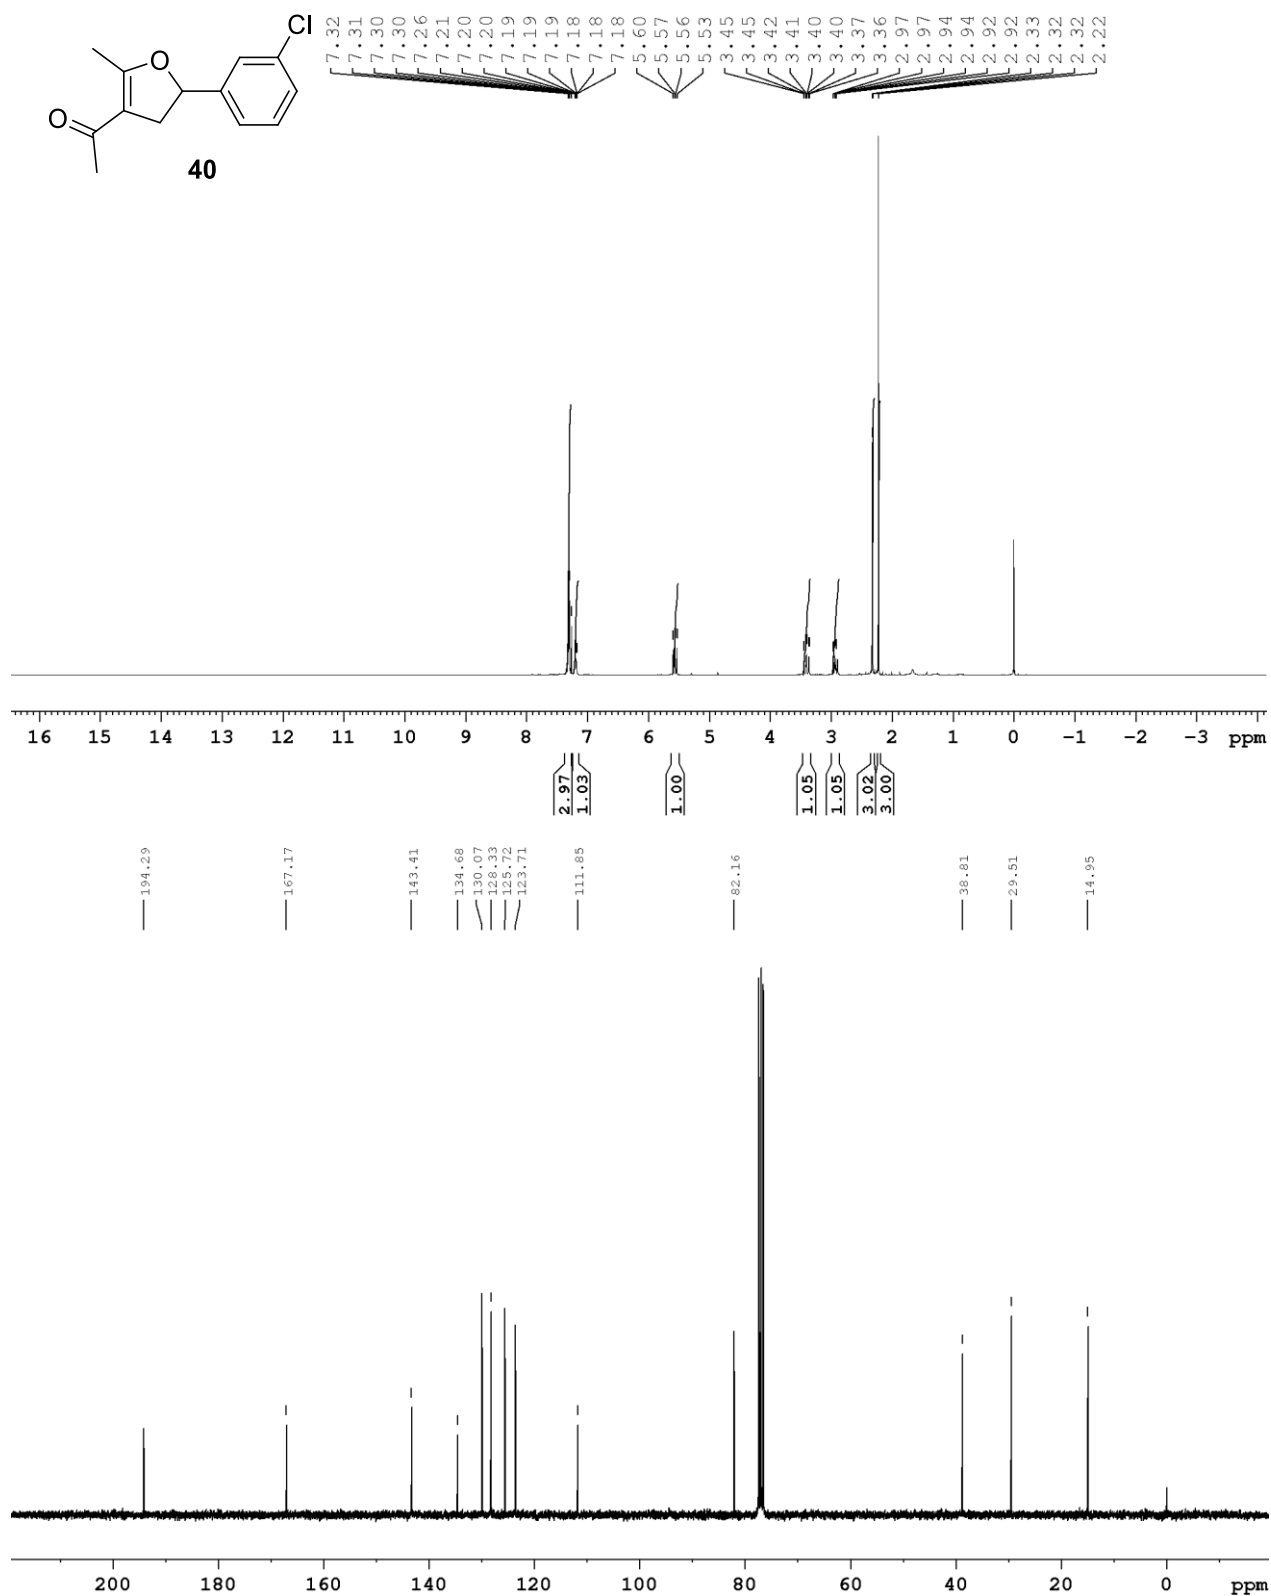

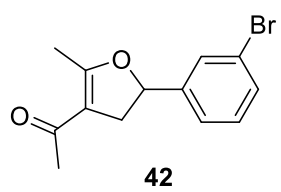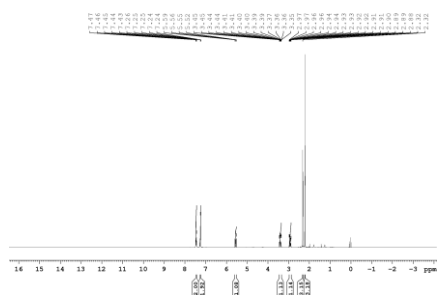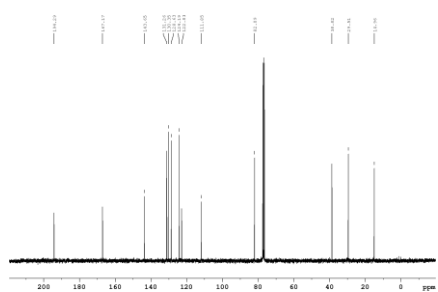

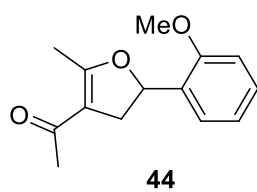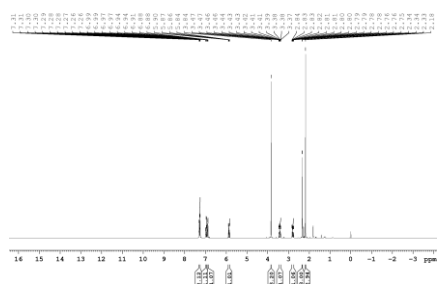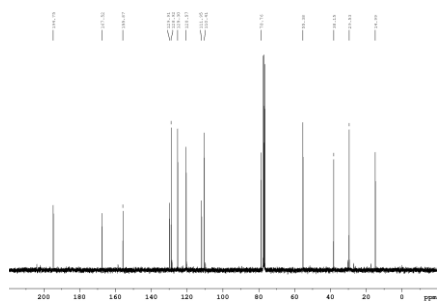

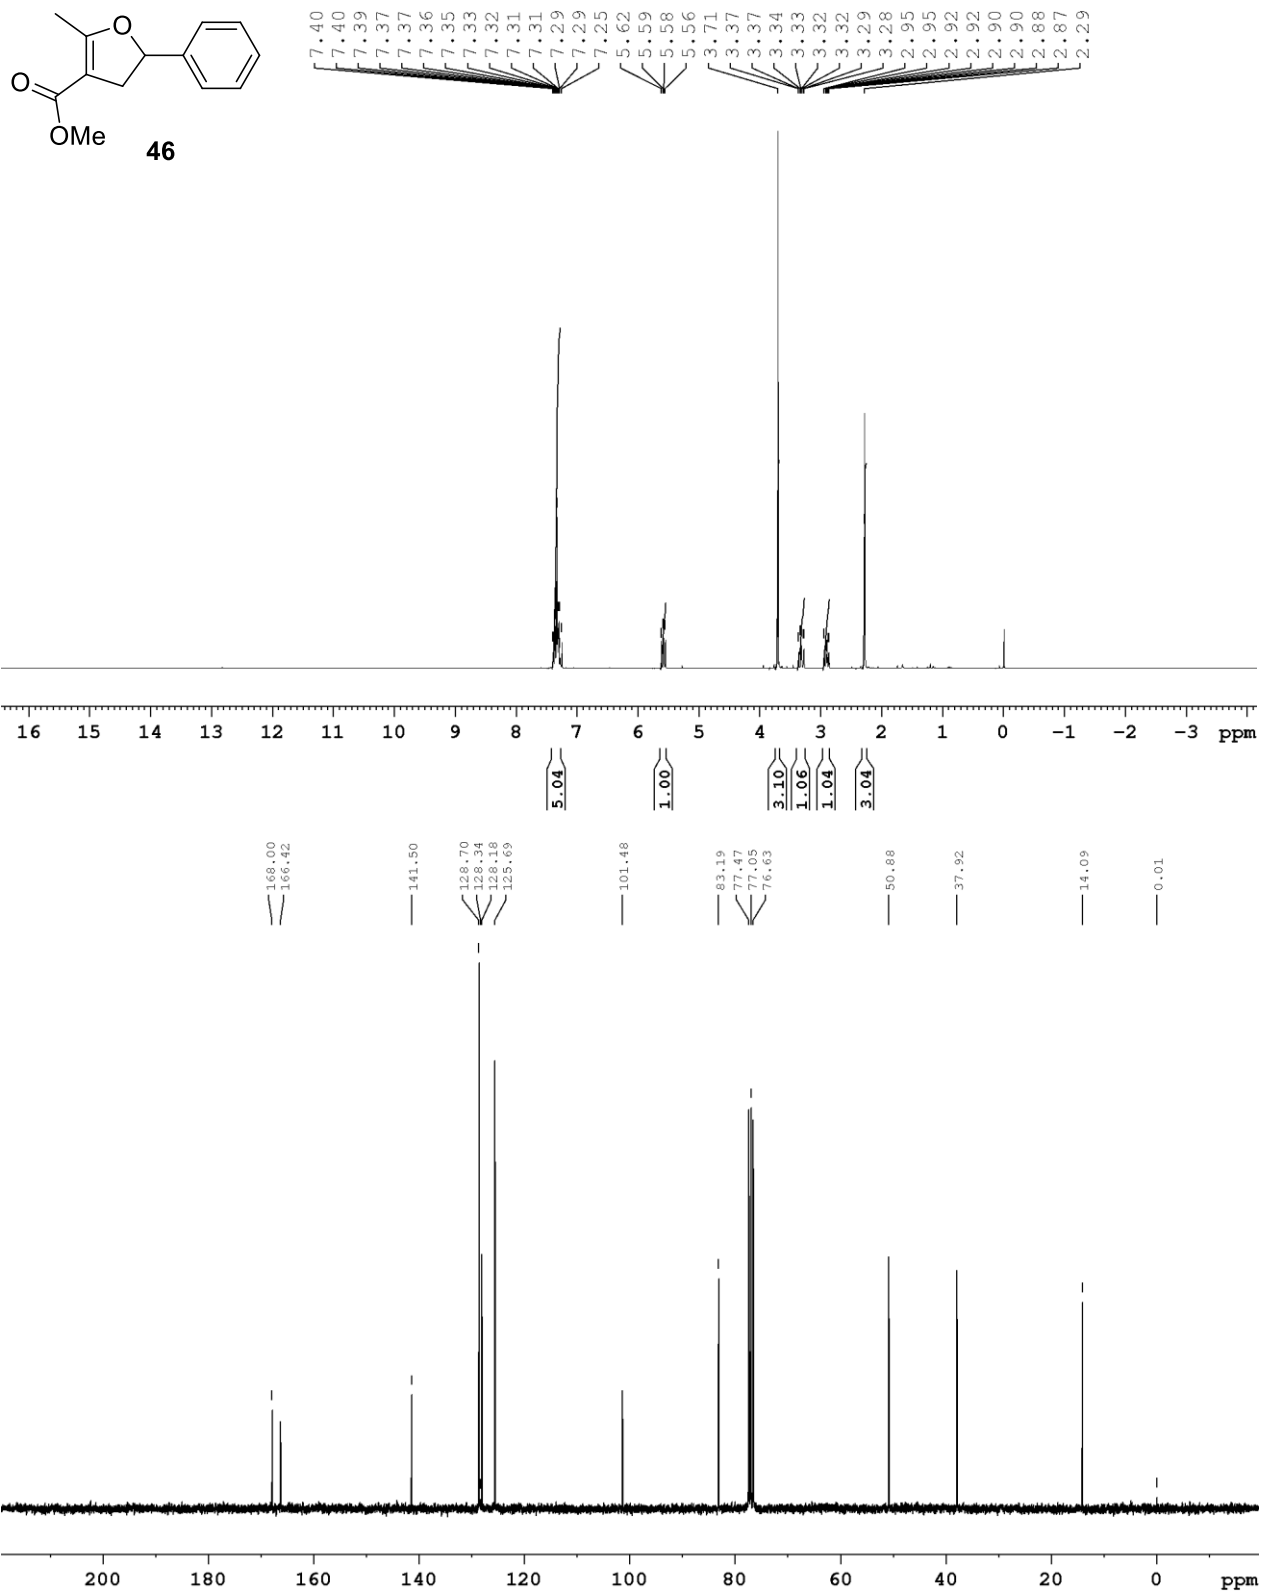

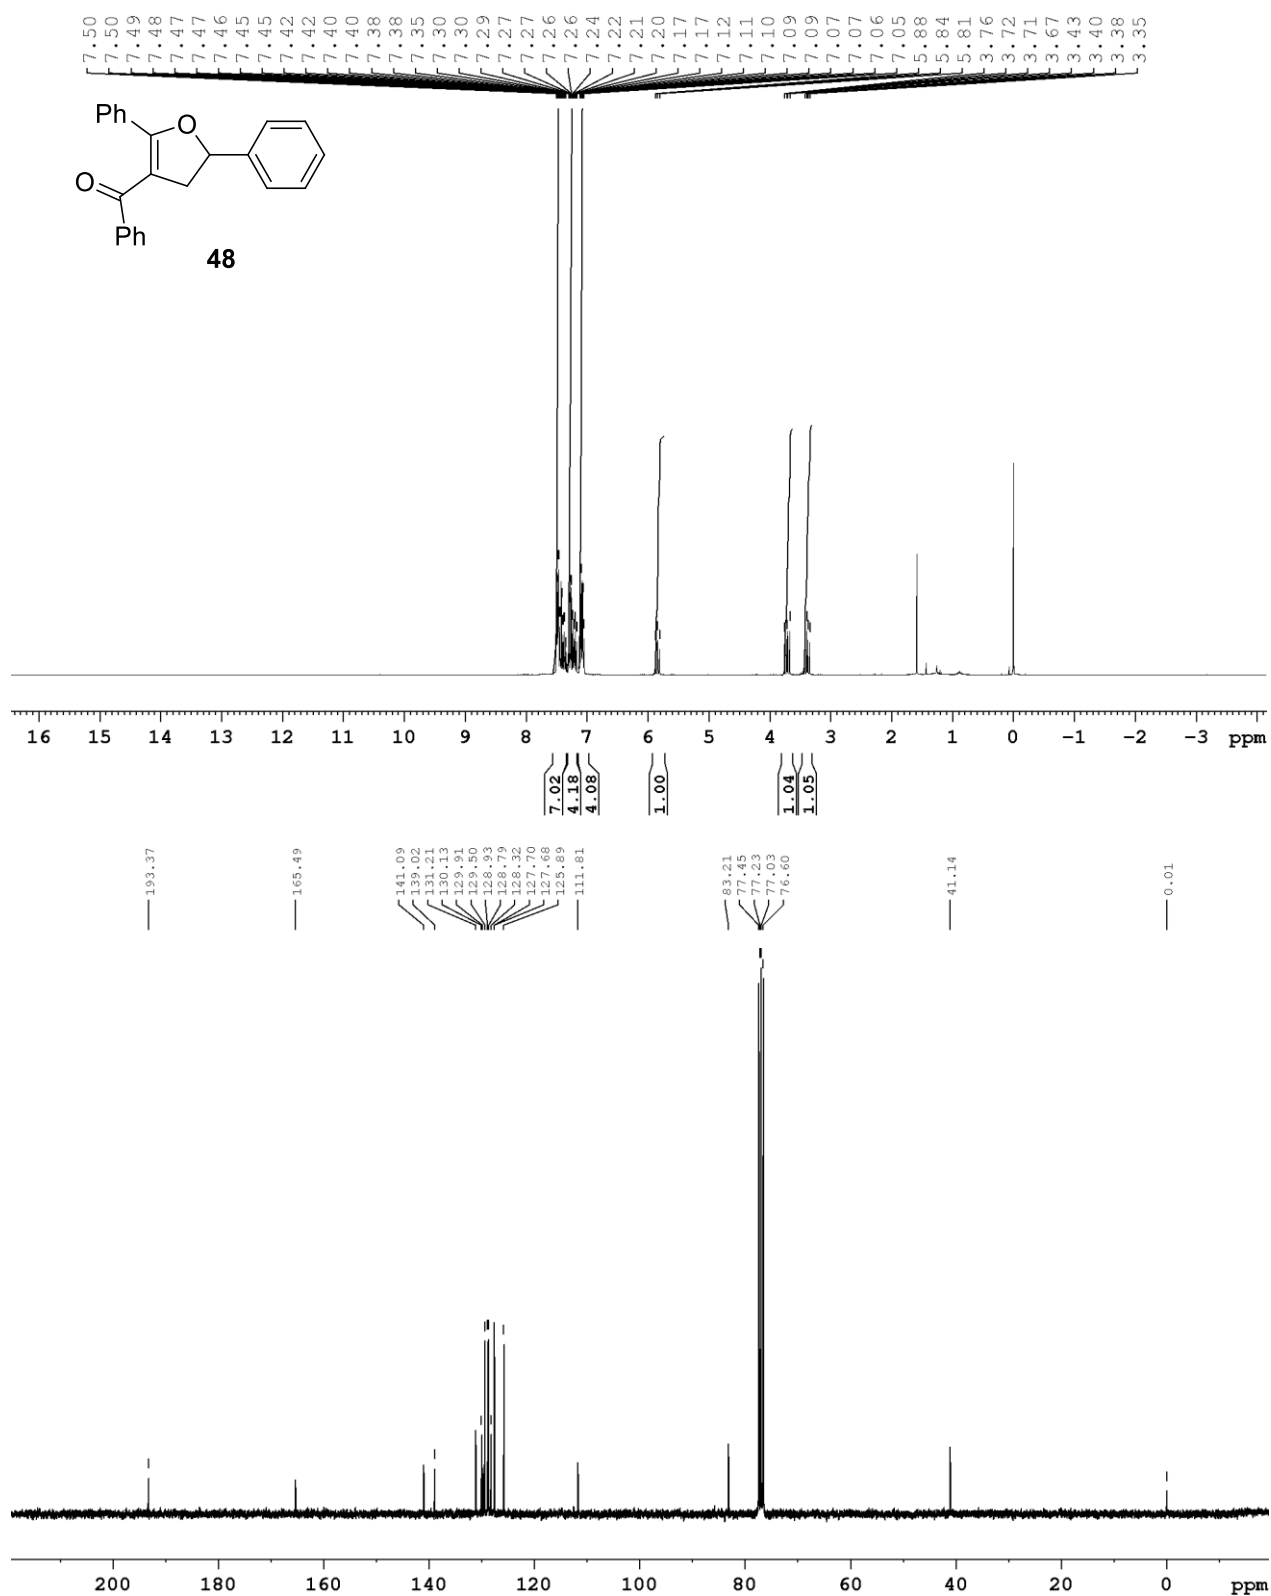



## 11. Additional information for Crystals

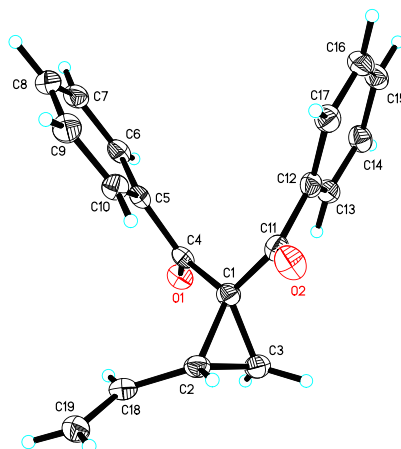

**Figure S14:** X-ray structure of compound **(R)-3**

**Table 3.** Crystal data and structure refinement for compound **(R)-3**.

|                             |                                                                                                          |
|-----------------------------|----------------------------------------------------------------------------------------------------------|
| Identification code         | s2179lc                                                                                                  |
| Empirical formula           | C <sub>19</sub> H <sub>16</sub> O <sub>2</sub>                                                           |
| Formula weight              | 276.32                                                                                                   |
| Temperature                 | 100(2) K                                                                                                 |
| Wavelength                  | 1.54178 Å                                                                                                |
| Crystal system, space group | Monoclinic, C 2                                                                                          |
| Unit cell dimensions        | a = 14.3210(8) Å alpha = 90 deg.<br>b = 8.9769(5) Å beta = 91.660(2)<br>c = 11.7100(7) Å gamma = 90 deg. |

|                                   |                                             |
|-----------------------------------|---------------------------------------------|
| Volume                            | 1504.78(15) Å <sup>3</sup>                  |
| Z, Calculated density             | 4, 1.220 Mg/m <sup>3</sup>                  |
| Absorption coefficient            | 0.618 mm <sup>-1</sup>                      |
| F(000)                            | 584                                         |
| Crystal size                      | 0.59 x 0.40 x 0.23 mm                       |
| Theta range for data collection   | 3.78 to 65.82 deg.                          |
| Limiting indices                  | -16 ≤ h ≤ 16, -9 ≤ k ≤ 10, -13 ≤ l ≤ 13     |
| Reflections collected / unique    | 8918 / 2432 [R(int) = 0.0386]               |
| Completeness to theta = 65.82     | 98.3 %                                      |
| Absorption correction             | Semi-empirical from equivalents             |
| Max. and min. transmission        | 0.7528 and 0.6481                           |
| Refinement method                 | Full-matrix least-squares on F <sup>2</sup> |
| Data / restraints / parameters    | 2432 / 1 / 191                              |
| Goodness-of-fit on F <sup>2</sup> | 1.032                                       |

Final R indices [ $I > 2\sigma(I)$ ]     $R1 = 0.0232$ ,  $wR2 = 0.0611$

R indices (all data)             $R1 = 0.0232$ ,  $wR2 = 0.0612$

Absolute structure parameter     $0.04(16)$

Extinction coefficient             $0.0046(3)$

Largest diff. peak and hole     $0.152$  and  $-0.117 \text{ e.Å}^{-3}$

**Table 4.** Atomic coordinates ( $\times 10^4$ ) and equivalent isotropic displacement parameters ( $\text{Å}^2 \times 10^3$ ) for s2179lc.  $U(\text{eq})$  is defined as one third of the trace of the orthogonalized  $U_{ij}$  tensor.

|      | x       | y        | z       | $U(\text{eq})$ |
|------|---------|----------|---------|----------------|
| O(1) | 8220(1) | 9840(1)  | 1002(1) | 24(1)          |
| C(1) | 6872(1) | 11133(1) | 1633(1) | 20(1)          |
| O(2) | 5476(1) | 11548(1) | 2652(1) | 30(1)          |
| C(2) | 7035(1) | 12823(1) | 1512(1) | 22(1)          |
| C(3) | 6736(1) | 11912(2) | 491(1)  | 25(1)          |
| C(4) | 7733(1) | 10182(1) | 1798(1) | 19(1)          |
| C(5) | 7995(1) | 9741(1)  | 2991(1) | 19(1)          |
| C(6) | 8571(1) | 8501(1)  | 3169(1) | 22(1)          |
| C(7) | 8859(1) | 8112(2)  | 4265(1) | 26(1)          |

|       |         |          |         |       |
|-------|---------|----------|---------|-------|
| C(8)  | 8596(1) | 8970(2)  | 5191(1) | 28(1) |
| C(9)  | 8031(1) | 10208(2) | 5016(1) | 28(1) |
| C(10) | 7723(1) | 10585(1) | 3923(1) | 23(1) |
| C(11) | 6006(1) | 10654(1) | 2228(1) | 21(1) |
| C(12) | 5796(1) | 9026(1)  | 2243(1) | 21(1) |
| C(13) | 6034(1) | 8118(1)  | 1328(1) | 22(1) |
| C(14) | 5790(1) | 6619(1)  | 1320(1) | 25(1) |
| C(15) | 5331(1) | 6018(2)  | 2237(1) | 26(1) |
| C(16) | 5107(1) | 6911(2)  | 3162(1) | 27(1) |
| C(17) | 5330(1) | 8410(2)  | 3161(1) | 25(1) |
| C(18) | 7985(1) | 13444(1) | 1643(1) | 23(1) |
| C(19) | 8159(1) | 14773(2) | 2084(1) | 26(1) |

---

**Table 5.** Bond lengths [Å] and angles [deg] for s2179lc.

---

|            |            |
|------------|------------|
| O(1)-C(4)  | 1.2193(14) |
| C(1)-C(11) | 1.5030(16) |
| C(1)-C(4)  | 1.5080(17) |
| C(1)-C(3)  | 1.5170(16) |
| C(1)-C(2)  | 1.5418(17) |
| O(2)-C(11) | 1.2202(15) |
| C(2)-C(18) | 1.4742(17) |
| C(2)-C(3)  | 1.5007(17) |
| C(2)-H(2)  | 1.0000     |
| C(3)-H(3A) | 0.9900     |
| C(3)-H(3B) | 0.9900     |

|              |            |
|--------------|------------|
| C(4)-C(5)    | 1.4898(17) |
| C(5)-C(10)   | 1.3926(17) |
| C(5)-C(6)    | 1.3972(17) |
| C(6)-C(7)    | 1.3818(18) |
| C(6)-H(6)    | 0.9500     |
| C(7)-C(8)    | 1.3898(19) |
| C(7)-H(7)    | 0.9500     |
| C(8)-C(9)    | 1.3863(19) |
| C(8)-H(8)    | 0.9500     |
| C(9)-C(10)   | 1.3838(18) |
| C(9)-H(9)    | 0.9500     |
| C(10)-H(10)  | 0.9500     |
| C(11)-C(12)  | 1.4921(17) |
| C(12)-C(17)  | 1.3964(17) |
| C(12)-C(13)  | 1.3969(17) |
| C(13)-C(14)  | 1.3903(19) |
| C(13)-H(13)  | 0.9500     |
| C(14)-C(15)  | 1.3841(18) |
| C(14)-H(14)  | 0.9500     |
| C(15)-C(16)  | 1.3933(19) |
| C(15)-H(15)  | 0.9500     |
| C(16)-C(17)  | 1.382(2)   |
| C(16)-H(16)  | 0.9500     |
| C(17)-H(17)  | 0.9500     |
| C(18)-C(19)  | 1.321(2)   |
| C(18)-H(18)  | 0.9500     |
| C(19)-H(19A) | 0.9500     |
| C(19)-H(19B) | 0.9500     |

|                  |            |
|------------------|------------|
| C(11)-C(1)-C(4)  | 117.47(10) |
| C(11)-C(1)-C(3)  | 117.00(10) |
| C(4)-C(1)-C(3)   | 117.27(10) |
| C(11)-C(1)-C(2)  | 116.97(10) |
| C(4)-C(1)-C(2)   | 116.31(10) |
| C(3)-C(1)-C(2)   | 58.75(8)   |
| C(18)-C(2)-C(3)  | 122.09(10) |
| C(18)-C(2)-C(1)  | 120.30(10) |
| C(3)-C(2)-C(1)   | 59.80(8)   |
| C(18)-C(2)-H(2)  | 114.6      |
| C(3)-C(2)-H(2)   | 114.6      |
| C(1)-C(2)-H(2)   | 114.6      |
| C(2)-C(3)-C(1)   | 61.45(7)   |
| C(2)-C(3)-H(3A)  | 117.6      |
| C(1)-C(3)-H(3A)  | 117.6      |
| C(2)-C(3)-H(3B)  | 117.6      |
| C(1)-C(3)-H(3B)  | 117.6      |
| H(3A)-C(3)-H(3B) | 114.7      |
| O(1)-C(4)-C(5)   | 121.11(10) |
| O(1)-C(4)-C(1)   | 121.88(10) |
| C(5)-C(4)-C(1)   | 116.93(10) |
| C(10)-C(5)-C(6)  | 119.57(11) |
| C(10)-C(5)-C(4)  | 121.48(10) |
| C(6)-C(5)-C(4)   | 118.84(10) |
| C(7)-C(6)-C(5)   | 119.92(11) |
| C(7)-C(6)-H(6)   | 120.0      |
| C(5)-C(6)-H(6)   | 120.0      |

|                   |            |
|-------------------|------------|
| C(6)-C(7)-C(8)    | 120.27(12) |
| C(6)-C(7)-H(7)    | 119.9      |
| C(8)-C(7)-H(7)    | 119.9      |
| C(9)-C(8)-C(7)    | 119.93(12) |
| C(9)-C(8)-H(8)    | 120.0      |
| C(7)-C(8)-H(8)    | 120.0      |
| C(10)-C(9)-C(8)   | 120.10(12) |
| C(10)-C(9)-H(9)   | 120.0      |
| C(8)-C(9)-H(9)    | 120.0      |
| C(9)-C(10)-C(5)   | 120.19(11) |
| C(9)-C(10)-H(10)  | 119.9      |
| C(5)-C(10)-H(10)  | 119.9      |
| O(2)-C(11)-C(12)  | 120.76(11) |
| O(2)-C(11)-C(1)   | 122.12(11) |
| C(12)-C(11)-C(1)  | 117.08(10) |
| C(17)-C(12)-C(13) | 119.48(11) |
| C(17)-C(12)-C(11) | 119.90(11) |
| C(13)-C(12)-C(11) | 120.58(11) |
| C(14)-C(13)-C(12) | 120.20(11) |
| C(14)-C(13)-H(13) | 119.9      |
| C(12)-C(13)-H(13) | 119.9      |
| C(15)-C(14)-C(13) | 119.82(12) |
| C(15)-C(14)-H(14) | 120.1      |
| C(13)-C(14)-H(14) | 120.1      |
| C(14)-C(15)-C(16) | 120.27(12) |
| C(14)-C(15)-H(15) | 119.9      |
| C(16)-C(15)-H(15) | 119.9      |
| C(17)-C(16)-C(15) | 120.07(11) |

|                     |            |
|---------------------|------------|
| C(17)-C(16)-H(16)   | 120.0      |
| C(15)-C(16)-H(16)   | 120.0      |
| C(16)-C(17)-C(12)   | 120.12(11) |
| C(16)-C(17)-H(17)   | 119.9      |
| C(12)-C(17)-H(17)   | 119.9      |
| C(19)-C(18)-C(2)    | 123.10(11) |
| C(19)-C(18)-H(18)   | 118.5      |
| C(2)-C(18)-H(18)    | 118.5      |
| C(18)-C(19)-H(19A)  | 120.0      |
| C(18)-C(19)-H(19B)  | 120.0      |
| H(19A)-C(19)-H(19B) | 120.0      |

---

Symmetry transformations used to generate equivalent atoms:

**Table 6.** Anisotropic displacement parameters ( $\text{\AA}^2 \times 10^3$ ) for s2179lc. The anisotropic displacement factor exponent takes the form:  $-2 \pi^2 [ h^2 a^{*2} U_{11} + \dots + 2 h k a^* b^* U_{12} ]$

---

|      | U11   | U22   | U33   | U23   | U13   | U12   |
|------|-------|-------|-------|-------|-------|-------|
| O(1) | 26(1) | 22(1) | 25(1) | -4(1) | 6(1)  | 0(1)  |
| C(1) | 24(1) | 16(1) | 21(1) | -1(1) | -1(1) | 0(1)  |
| O(2) | 26(1) | 24(1) | 41(1) | -7(1) | 7(1)  | 1(1)  |
| C(2) | 26(1) | 16(1) | 23(1) | 2(1)  | -1(1) | 1(1)  |
| C(3) | 30(1) | 22(1) | 23(1) | 3(1)  | -3(1) | -1(1) |
| C(4) | 21(1) | 13(1) | 23(1) | -2(1) | 3(1)  | -4(1) |

---



|       |       |       |       |       |       |       |
|-------|-------|-------|-------|-------|-------|-------|
| C(5)  | 16(1) | 16(1) | 25(1) | -1(1) | 2(1)  | -3(1) |
| C(6)  | 20(1) | 16(1) | 30(1) | -1(1) | 3(1)  | -2(1) |
| C(7)  | 24(1) | 18(1) | 36(1) | 6(1)  | -3(1) | -1(1) |
| C(8)  | 27(1) | 31(1) | 26(1) | 9(1)  | -3(1) | -6(1) |
| C(9)  | 28(1) | 31(1) | 24(1) | -2(1) | 4(1)  | -1(1) |
| C(10) | 22(1) | 21(1) | 25(1) | 0(1)  | 2(1)  | 3(1)  |
| C(11) | 20(1) | 22(1) | 22(1) | -1(1) | -2(1) | 2(1)  |
| C(12) | 16(1) | 22(1) | 24(1) | 0(1)  | -1(1) | 1(1)  |
| C(13) | 22(1) | 22(1) | 24(1) | 1(1)  | 1(1)  | -1(1) |
| C(14) | 22(1) | 22(1) | 31(1) | -4(1) | 1(1)  | 0(1)  |
| C(15) | 21(1) | 19(1) | 40(1) | 3(1)  | 0(1)  | -1(1) |
| C(16) | 21(1) | 29(1) | 31(1) | 7(1)  | 4(1)  | -3(1) |
| C(17) | 21(1) | 28(1) | 25(1) | 0(1)  | 2(1)  | 1(1)  |
| C(18) | 27(1) | 19(1) | 22(1) | 4(1)  | 2(1)  | 3(1)  |
| C(19) | 26(1) | 22(1) | 31(1) | 1(1)  | -1(1) | -1(1) |

---

**Table 7.** Hydrogen coordinates ( $\times 10^4$ ) and isotropic displacement parameters ( $\text{\AA}^2 \times 10^3$ ) for s2179lc.

---

|       | x    | y     | z    | U(eq) |
|-------|------|-------|------|-------|
| <hr/> |      |       |      |       |
| H(2)  | 6532 | 13460 | 1830 | 26    |
| H(3A) | 7204 | 11725 | -99  | 30    |
| H(3B) | 6087 | 12041 | 189  | 30    |

|        |      |       |      |    |
|--------|------|-------|------|----|
| H(6)   | 8764 | 7926  | 2537 | 27 |
| H(7)   | 9238 | 7255  | 4387 | 31 |
| H(8)   | 8804 | 8708  | 5942 | 34 |
| H(9)   | 7855 | 10798 | 5648 | 33 |
| H(10)  | 7325 | 11421 | 3808 | 27 |
| H(13)  | 6364 | 8525  | 709  | 27 |
| H(14)  | 5937 | 6009  | 688  | 30 |
| H(15)  | 5169 | 4992  | 2235 | 32 |
| H(16)  | 4800 | 6491  | 3795 | 32 |
| H(17)  | 5165 | 9021  | 3786 | 30 |
| H(18)  | 8496 | 12862 | 1399 | 27 |
| H(19A) | 7660 | 15377 | 2334 | 32 |
| H(19B) | 8784 | 15126 | 2152 | 32 |

---

**Table 8.** Torsion angles [deg] for s2179lc.

---

|                       |             |
|-----------------------|-------------|
| C(11)-C(1)-C(2)-C(18) | 141.50(11)  |
| C(4)-C(1)-C(2)-C(18)  | -4.50(16)   |
| C(3)-C(1)-C(2)-C(18)  | -111.82(13) |
| C(11)-C(1)-C(2)-C(3)  | -106.68(11) |
| C(4)-C(1)-C(2)-C(3)   | 107.33(11)  |
| C(18)-C(2)-C(3)-C(1)  | 108.91(12)  |
| C(11)-C(1)-C(3)-C(2)  | 106.63(11)  |
| C(4)-C(1)-C(3)-C(2)   | -105.70(11) |
| C(11)-C(1)-C(4)-O(1)  | 135.43(11)  |
| C(3)-C(1)-C(4)-O(1)   | -12.09(16)  |

|                         |             |
|-------------------------|-------------|
| C(2)-C(1)-C(4)-O(1)     | -78.75(14)  |
| C(11)-C(1)-C(4)-C(5)    | -47.73(14)  |
| C(3)-C(1)-C(4)-C(5)     | 164.75(10)  |
| C(2)-C(1)-C(4)-C(5)     | 98.09(12)   |
| O(1)-C(4)-C(5)-C(10)    | 151.98(11)  |
| C(1)-C(4)-C(5)-C(10)    | -24.89(16)  |
| O(1)-C(4)-C(5)-C(6)     | -24.20(17)  |
| C(1)-C(4)-C(5)-C(6)     | 158.93(10)  |
| C(10)-C(5)-C(6)-C(7)    | 0.65(17)    |
| C(4)-C(5)-C(6)-C(7)     | 176.91(10)  |
| C(5)-C(6)-C(7)-C(8)     | -1.54(17)   |
| C(6)-C(7)-C(8)-C(9)     | 1.02(18)    |
| C(7)-C(8)-C(9)-C(10)    | 0.41(18)    |
| C(8)-C(9)-C(10)-C(5)    | -1.30(18)   |
| C(6)-C(5)-C(10)-C(9)    | 0.77(17)    |
| C(4)-C(5)-C(10)-C(9)    | -175.39(11) |
| C(4)-C(1)-C(11)-O(2)    | 141.85(12)  |
| C(3)-C(1)-C(11)-O(2)    | -70.54(15)  |
| C(2)-C(1)-C(11)-O(2)    | -3.75(16)   |
| C(4)-C(1)-C(11)-C(12)   | -40.41(14)  |
| C(3)-C(1)-C(11)-C(12)   | 107.20(12)  |
| C(2)-C(1)-C(11)-C(12)   | 173.99(10)  |
| O(2)-C(11)-C(12)-C(17)  | -33.00(17)  |
| C(1)-C(11)-C(12)-C(17)  | 149.23(11)  |
| O(2)-C(11)-C(12)-C(13)  | 144.85(11)  |
| C(1)-C(11)-C(12)-C(13)  | -32.92(16)  |
| C(17)-C(12)-C(13)-C(14) | 1.42(17)    |
| C(11)-C(12)-C(13)-C(14) | -176.44(11) |

|                         |             |
|-------------------------|-------------|
| C(12)-C(13)-C(14)-C(15) | -1.71(18)   |
| C(13)-C(14)-C(15)-C(16) | 0.54(18)    |
| C(14)-C(15)-C(16)-C(17) | 0.93(18)    |
| C(15)-C(16)-C(17)-C(12) | -1.22(18)   |
| C(13)-C(12)-C(17)-C(16) | 0.05(17)    |
| C(11)-C(12)-C(17)-C(16) | 177.93(11)  |
| C(3)-C(2)-C(18)-C(19)   | 142.07(12)  |
| C(1)-C(2)-C(18)-C(19)   | -146.68(12) |

---

Symmetry transformations used to generate equivalent atoms:

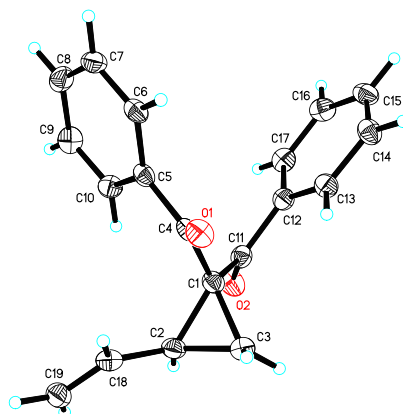

**Figure S15:** X-ray structure of compound (S)-3

**Table 9.** Crystal data and structure refinement for (S)-3.

|                             |                                                                                                                                                                  |
|-----------------------------|------------------------------------------------------------------------------------------------------------------------------------------------------------------|
| Identification code         | s2181lc                                                                                                                                                          |
| Empirical formula           | C <sub>19</sub> H <sub>16</sub> O <sub>2</sub>                                                                                                                   |
| Formula weight              | 276.32                                                                                                                                                           |
| Temperature                 | 100(2) K                                                                                                                                                         |
| Wavelength                  | 1.54178 Å                                                                                                                                                        |
| Crystal system, space group | Monoclinic, C 2                                                                                                                                                  |
| Unit cell dimensions        | $a = 14.3185(10) \text{ Å}$ $\alpha = 90 \text{ deg.}$<br>$b = 8.9738(6) \text{ Å}$ $\beta = 91.675(3)$<br>$c = 11.7148(8) \text{ Å}$ $\gamma = 90 \text{ deg.}$ |

|                                   |                                             |
|-----------------------------------|---------------------------------------------|
| Volume                            | 1504.61(18) Å <sup>3</sup>                  |
| Z, Calculated density             | 4, 1.220 Mg/m <sup>3</sup>                  |
| Absorption coefficient            | 0.619 mm <sup>-1</sup>                      |
| F(000)                            | 584                                         |
| Crystal size                      | 0.53 x 0.49 x 0.27 mm                       |
| Theta range for data collection   | 3.77 to 65.86 deg.                          |
| Limiting indices                  | -16 ≤ h ≤ 16, -9 ≤ k ≤ 10, -13 ≤ l ≤ 13     |
| Reflections collected / unique    | 8708 / 2353 [R(int) = 0.0340]               |
| Completeness to theta = 65.86     | 96.5 %                                      |
| Absorption correction             | Semi-empirical from equivalents             |
| Max. and min. transmission        | 0.7528 and 0.6797                           |
| Refinement method                 | Full-matrix least-squares on F <sup>2</sup> |
| Data / restraints / parameters    | 2353 / 1 / 191                              |
| Goodness-of-fit on F <sup>2</sup> | 1.055                                       |

Final R indices [ $I > 2\sigma(I)$ ]  $R1 = 0.0233$ ,  $wR2 = 0.0593$

R indices (all data)  $R1 = 0.0233$ ,  $wR2 = 0.0594$

Absolute structure parameter  $0.00(16)$

Extinction coefficient  $0.0041(2)$

Largest diff. peak and hole  $0.137$  and  $-0.101 \text{ e.}\text{\AA}^{-3}$

**Table 10.** Atomic coordinates ( $\times 10^4$ ) and equivalent isotropic displacement parameters ( $\text{\AA}^2 \times 10^3$ ) for s2181lc.  $U(\text{eq})$  is defined as one third of the trace of the orthogonalized  $U_{ij}$  tensor.

|      | x       | y        | z       | $U(\text{eq})$ |
|------|---------|----------|---------|----------------|
| O(1) | 1780(1) | 159(1)   | 8999(1) | 25(1)          |
| C(1) | 3128(1) | -1133(1) | 8367(1) | 21(1)          |
| O(2) | 4524(1) | -1548(1) | 7348(1) | 31(1)          |
| C(2) | 2965(1) | -2823(1) | 8489(1) | 23(1)          |
| C(3) | 3264(1) | -1913(2) | 9509(1) | 26(1)          |
| C(4) | 2267(1) | -183(1)  | 8201(1) | 20(1)          |
| C(5) | 2006(1) | 258(1)   | 7010(1) | 20(1)          |
| C(6) | 1431(1) | 1499(1)  | 6832(1) | 23(1)          |
| C(7) | 1142(1) | 1889(2)  | 5737(1) | 27(1)          |
| C(8) | 1404(1) | 1031(2)  | 4810(1) | 29(1)          |

|       |         |          |         |       |
|-------|---------|----------|---------|-------|
| C(9)  | 1968(1) | -206(2)  | 4985(1) | 28(1) |
| C(10) | 2276(1) | -584(1)  | 6078(1) | 23(1) |
| C(11) | 3994(1) | -654(1)  | 7773(1) | 22(1) |
| C(12) | 4204(1) | 975(1)   | 7759(1) | 22(1) |
| C(13) | 3967(1) | 1883(2)  | 8671(1) | 23(1) |
| C(14) | 4210(1) | 3380(2)  | 8681(1) | 26(1) |
| C(15) | 4669(1) | 3982(2)  | 7762(1) | 27(1) |
| C(16) | 4893(1) | 3089(2)  | 6839(1) | 28(1) |
| C(17) | 4670(1) | 1591(2)  | 6839(1) | 26(1) |
| C(18) | 2016(1) | -3445(1) | 8357(1) | 23(1) |
| C(19) | 1841(1) | -4772(2) | 7916(1) | 27(1) |

---

**Table 11.** Bond lengths [Å] and angles [deg] for s2181lc.

---

|            |            |
|------------|------------|
| O(1)-C(4)  | 1.2221(14) |
| C(1)-C(11) | 1.5026(16) |
| C(1)-C(4)  | 1.5064(17) |
| C(1)-C(3)  | 1.5167(17) |
| C(1)-C(2)  | 1.5423(18) |
| O(2)-C(11) | 1.2198(15) |
| C(2)-C(18) | 1.4722(17) |
| C(2)-C(3)  | 1.4992(18) |
| C(2)-H(2)  | 1.0000     |
| C(3)-H(3A) | 0.9900     |
| C(3)-H(3B) | 0.9900     |
| C(4)-C(5)  | 1.4877(17) |



|              |            |
|--------------|------------|
| C(5)-C(10)   | 1.3923(17) |
| C(5)-C(6)    | 1.3972(18) |
| C(6)-C(7)    | 1.3809(18) |
| C(6)-H(6)    | 0.9500     |
| C(7)-C(8)    | 1.392(2)   |
| C(7)-H(7)    | 0.9500     |
| C(8)-C(9)    | 1.384(2)   |
| C(8)-H(8)    | 0.9500     |
| C(9)-C(10)   | 1.3839(18) |
| C(9)-H(9)    | 0.9500     |
| C(10)-H(10)  | 0.9500     |
| C(11)-C(12)  | 1.4931(18) |
| C(12)-C(13)  | 1.3940(18) |
| C(12)-C(17)  | 1.3972(17) |
| C(13)-C(14)  | 1.388(2)   |
| C(13)-H(13)  | 0.9500     |
| C(14)-C(15)  | 1.3870(19) |
| C(14)-H(14)  | 0.9500     |
| C(15)-C(16)  | 1.391(2)   |
| C(15)-H(15)  | 0.9500     |
| C(16)-C(17)  | 1.381(2)   |
| C(16)-H(16)  | 0.9500     |
| C(17)-H(17)  | 0.9500     |
| C(18)-C(19)  | 1.320(2)   |
| C(18)-H(18)  | 0.9500     |
| C(19)-H(19A) | 0.9500     |
| C(19)-H(19B) | 0.9500     |

|                  |            |
|------------------|------------|
| C(11)-C(1)-C(4)  | 117.52(10) |
| C(11)-C(1)-C(3)  | 117.00(10) |
| C(4)-C(1)-C(3)   | 117.29(10) |
| C(11)-C(1)-C(2)  | 116.97(10) |
| C(4)-C(1)-C(2)   | 116.24(10) |
| C(3)-C(1)-C(2)   | 58.69(8)   |
| C(18)-C(2)-C(3)  | 122.11(11) |
| C(18)-C(2)-C(1)  | 120.34(11) |
| C(3)-C(2)-C(1)   | 59.80(8)   |
| C(18)-C(2)-H(2)  | 114.6      |
| C(3)-C(2)-H(2)   | 114.6      |
| C(1)-C(2)-H(2)   | 114.6      |
| C(2)-C(3)-C(1)   | 61.51(8)   |
| C(2)-C(3)-H(3A)  | 117.6      |
| C(1)-C(3)-H(3A)  | 117.6      |
| C(2)-C(3)-H(3B)  | 117.6      |
| C(1)-C(3)-H(3B)  | 117.6      |
| H(3A)-C(3)-H(3B) | 114.7      |
| O(1)-C(4)-C(5)   | 121.09(11) |
| O(1)-C(4)-C(1)   | 121.81(11) |
| C(5)-C(4)-C(1)   | 117.03(10) |
| C(10)-C(5)-C(6)  | 119.41(11) |
| C(10)-C(5)-C(4)  | 121.56(11) |
| C(6)-C(5)-C(4)   | 118.93(10) |
| C(7)-C(6)-C(5)   | 120.03(11) |
| C(7)-C(6)-H(6)   | 120.0      |
| C(5)-C(6)-H(6)   | 120.0      |
| C(6)-C(7)-C(8)   | 120.25(12) |

|                   |            |
|-------------------|------------|
| C(6)-C(7)-H(7)    | 119.9      |
| C(8)-C(7)-H(7)    | 119.9      |
| C(9)-C(8)-C(7)    | 119.87(12) |
| C(9)-C(8)-H(8)    | 120.1      |
| C(7)-C(8)-H(8)    | 120.1      |
| C(10)-C(9)-C(8)   | 120.12(12) |
| C(10)-C(9)-H(9)   | 119.9      |
| C(8)-C(9)-H(9)    | 119.9      |
| C(9)-C(10)-C(5)   | 120.31(12) |
| C(9)-C(10)-H(10)  | 119.8      |
| C(5)-C(10)-H(10)  | 119.8      |
| O(2)-C(11)-C(12)  | 120.79(11) |
| O(2)-C(11)-C(1)   | 122.18(12) |
| C(12)-C(11)-C(1)  | 116.99(10) |
| C(13)-C(12)-C(17) | 119.51(11) |
| C(13)-C(12)-C(11) | 120.69(11) |
| C(17)-C(12)-C(11) | 119.76(11) |
| C(14)-C(13)-C(12) | 120.34(11) |
| C(14)-C(13)-H(13) | 119.8      |
| C(12)-C(13)-H(13) | 119.8      |
| C(15)-C(14)-C(13) | 119.71(12) |
| C(15)-C(14)-H(14) | 120.1      |
| C(13)-C(14)-H(14) | 120.1      |
| C(14)-C(15)-C(16) | 120.23(13) |
| C(14)-C(15)-H(15) | 119.9      |
| C(16)-C(15)-H(15) | 119.9      |
| C(17)-C(16)-C(15) | 120.18(11) |
| C(17)-C(16)-H(16) | 119.9      |

|                     |            |
|---------------------|------------|
| C(15)-C(16)-H(16)   | 119.9      |
| C(16)-C(17)-C(12)   | 120.00(12) |
| C(16)-C(17)-H(17)   | 120.0      |
| C(12)-C(17)-H(17)   | 120.0      |
| C(19)-C(18)-C(2)    | 123.14(11) |
| C(19)-C(18)-H(18)   | 118.4      |
| C(2)-C(18)-H(18)    | 118.4      |
| C(18)-C(19)-H(19A)  | 120.0      |
| C(18)-C(19)-H(19B)  | 120.0      |
| H(19A)-C(19)-H(19B) | 120.0      |

---

Symmetry transformations used to generate equivalent atoms:

**Table 12.** Anisotropic displacement parameters ( $\text{\AA}^2 \times 10^3$ ) for s2181lc. The anisotropic displacement factor exponent takes the form:  $-2 \pi^2 [ h^2 a^{*2} U_{11} + \dots + 2 h k a^* b^* U_{12} ]$

---

|  | U11 | U22 | U33 | U23 | U13 | U12 |
|--|-----|-----|-----|-----|-----|-----|
|--|-----|-----|-----|-----|-----|-----|

---

|      |       |       |       |       |       |       |
|------|-------|-------|-------|-------|-------|-------|
| O(1) | 27(1) | 24(1) | 25(1) | -3(1) | 7(1)  | 0(1)  |
| C(1) | 24(1) | 18(1) | 22(1) | -2(1) | 1(1)  | 0(1)  |
| O(2) | 25(1) | 27(1) | 41(1) | -7(1) | 7(1)  | 2(1)  |
| C(2) | 27(1) | 17(1) | 24(1) | 2(1)  | 1(1)  | 2(1)  |
| C(3) | 30(1) | 24(1) | 24(1) | 3(1)  | -2(1) | -1(1) |
| C(4) | 21(1) | 15(1) | 23(1) | -3(1) | 4(1)  | -4(1) |

|       |       |       |       |       |       |       |
|-------|-------|-------|-------|-------|-------|-------|
| C(5)  | 16(1) | 18(1) | 25(1) | -1(1) | 3(1)  | -3(1) |
| C(6)  | 21(1) | 18(1) | 31(1) | -1(1) | 3(1)  | -3(1) |
| C(7)  | 24(1) | 20(1) | 36(1) | 6(1)  | -1(1) | -1(1) |
| C(8)  | 27(1) | 34(1) | 26(1) | 8(1)  | -3(1) | -6(1) |
| C(9)  | 27(1) | 33(1) | 25(1) | -2(1) | 4(1)  | -1(1) |
| C(10) | 23(1) | 22(1) | 25(1) | 0(1)  | 3(1)  | 2(1)  |
| C(11) | 20(1) | 24(1) | 22(1) | -1(1) | -1(1) | 2(1)  |
| C(12) | 17(1) | 23(1) | 25(1) | 0(1)  | -1(1) | 1(1)  |
| C(13) | 22(1) | 24(1) | 25(1) | 1(1)  | 2(1)  | -2(1) |
| C(14) | 22(1) | 23(1) | 32(1) | -4(1) | 2(1)  | -1(1) |
| C(15) | 22(1) | 20(1) | 40(1) | 4(1)  | 0(1)  | -1(1) |
| C(16) | 22(1) | 31(1) | 31(1) | 8(1)  | 5(1)  | -2(1) |
| C(17) | 21(1) | 30(1) | 26(1) | 0(1)  | 3(1)  | 1(1)  |
| C(18) | 27(1) | 21(1) | 22(1) | 4(1)  | 3(1)  | 3(1)  |
| C(19) | 26(1) | 23(1) | 32(1) | 1(1)  | 0(1)  | -1(1) |

**Table 13.** Hydrogen coordinates ( $\times 10^4$ ) and isotropic displacement parameters ( $\text{\AA}^2 \times 10^3$ ) for s2181lc.

|       | x    | y     | z     | U(eq) |
|-------|------|-------|-------|-------|
| H(2)  | 3467 | -3461 | 8171  | 27    |
| H(3A) | 3912 | -2043 | 9810  | 31    |
| H(3B) | 2796 | -1726 | 10097 | 31    |

|        |      |       |      |    |
|--------|------|-------|------|----|
| H(6)   | 1239 | 2076  | 7463 | 27 |
| H(7)   | 762  | 2746  | 5616 | 32 |
| H(8)   | 1196 | 1293  | 4059 | 35 |
| H(9)   | 2144 | -797  | 4353 | 34 |
| H(10)  | 2673 | -1422 | 6192 | 28 |
| H(13)  | 3637 | 1475  | 9290 | 28 |
| H(14)  | 4063 | 3990  | 9313 | 31 |
| H(15)  | 4832 | 5009  | 7763 | 33 |
| H(16)  | 5199 | 3509  | 6207 | 33 |
| H(17)  | 4834 | 979   | 6214 | 31 |
| H(18)  | 1505 | -2862 | 8602 | 28 |
| H(19A) | 2340 | -5376 | 7666 | 32 |
| H(19B) | 1216 | -5124 | 7849 | 32 |

---

**Table 14.** Torsion angles [deg] for s2181lc.

---

|                       |             |
|-----------------------|-------------|
| C(11)-C(1)-C(2)-C(18) | -141.50(11) |
| C(4)-C(1)-C(2)-C(18)  | 4.48(16)    |
| C(3)-C(1)-C(2)-C(18)  | 111.84(13)  |
| C(11)-C(1)-C(2)-C(3)  | 106.65(12)  |
| C(4)-C(1)-C(2)-C(3)   | -107.36(11) |
| C(18)-C(2)-C(3)-C(1)  | -108.95(13) |
| C(11)-C(1)-C(3)-C(2)  | -106.61(12) |
| C(4)-C(1)-C(3)-C(2)   | 105.58(12)  |
| C(11)-C(1)-C(4)-O(1)  | -135.45(12) |
| C(3)-C(1)-C(4)-O(1)   | 12.19(17)   |

|                         |             |
|-------------------------|-------------|
| C(2)-C(1)-C(4)-O(1)     | 78.76(15)   |
| C(11)-C(1)-C(4)-C(5)    | 47.69(15)   |
| C(3)-C(1)-C(4)-C(5)     | -164.67(10) |
| C(2)-C(1)-C(4)-C(5)     | -98.10(12)  |
| O(1)-C(4)-C(5)-C(10)    | -151.97(12) |
| C(1)-C(4)-C(5)-C(10)    | 24.92(16)   |
| O(1)-C(4)-C(5)-C(6)     | 24.36(17)   |
| C(1)-C(4)-C(5)-C(6)     | -158.75(10) |
| C(10)-C(5)-C(6)-C(7)    | -0.49(17)   |
| C(4)-C(5)-C(6)-C(7)     | -176.90(11) |
| C(5)-C(6)-C(7)-C(8)     | 1.36(18)    |
| C(6)-C(7)-C(8)-C(9)     | -0.91(18)   |
| C(7)-C(8)-C(9)-C(10)    | -0.41(19)   |
| C(8)-C(9)-C(10)-C(5)    | 1.28(19)    |
| C(6)-C(5)-C(10)-C(9)    | -0.83(18)   |
| C(4)-C(5)-C(10)-C(9)    | 175.49(11)  |
| C(4)-C(1)-C(11)-O(2)    | -141.75(12) |
| C(3)-C(1)-C(11)-O(2)    | 70.52(15)   |
| C(2)-C(1)-C(11)-O(2)    | 3.80(17)    |
| C(4)-C(1)-C(11)-C(12)   | 40.50(15)   |
| C(3)-C(1)-C(11)-C(12)   | -107.24(13) |
| C(2)-C(1)-C(11)-C(12)   | -173.96(11) |
| O(2)-C(11)-C(12)-C(13)  | -144.85(12) |
| C(1)-C(11)-C(12)-C(13)  | 32.94(16)   |
| O(2)-C(11)-C(12)-C(17)  | 33.06(18)   |
| C(1)-C(11)-C(12)-C(17)  | -149.15(11) |
| C(17)-C(12)-C(13)-C(14) | -1.49(18)   |
| C(11)-C(12)-C(13)-C(14) | 176.43(11)  |

|                         |             |
|-------------------------|-------------|
| C(12)-C(13)-C(14)-C(15) | 1.75(18)    |
| C(13)-C(14)-C(15)-C(16) | -0.56(18)   |
| C(14)-C(15)-C(16)-C(17) | -0.91(18)   |
| C(15)-C(16)-C(17)-C(12) | 1.17(18)    |
| C(13)-C(12)-C(17)-C(16) | 0.02(18)    |
| C(11)-C(12)-C(17)-C(16) | -177.92(11) |
| C(3)-C(2)-C(18)-C(19)   | -142.11(13) |
| C(1)-C(2)-C(18)-C(19)   | 146.59(12)  |

---

Symmetry transformations used to generate equivalent atoms:



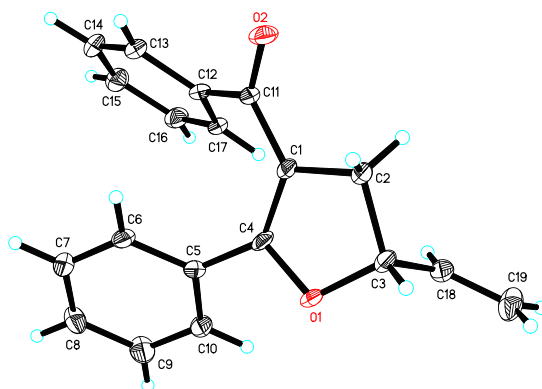

**Figure S16:** X-ray structure of compound **(R)-4**

**Table 15.** Crystal data and structure refinement for **(R)-4**.

|                             |                                                                                                                         |
|-----------------------------|-------------------------------------------------------------------------------------------------------------------------|
| Identification code         | s2180lc                                                                                                                 |
| Empirical formula           | C <sub>19</sub> H <sub>16</sub> O <sub>2</sub>                                                                          |
| Formula weight              | 276.32                                                                                                                  |
| Temperature                 | 100(2) K                                                                                                                |
| Wavelength                  | 1.54178 Å                                                                                                               |
| Crystal system, space group | Monoclinic, P 2 <sub>1</sub>                                                                                            |
| Unit cell dimensions        | $a = 6.3155(3)$ Å $\alpha = 90$ deg.<br>$b = 7.7433(4)$ Å $\beta = 100.579(3)$<br>$c = 15.0935(9)$ Å $\gamma = 90$ deg. |

|                                   |                                             |
|-----------------------------------|---------------------------------------------|
| Volume                            | 725.57(7) Å <sup>3</sup>                    |
| Z, Calculated density             | 2, 1.265 Mg/m <sup>3</sup>                  |
| Absorption coefficient            | 0.641 mm <sup>-1</sup>                      |
| F(000)                            | 292                                         |
| Crystal size                      | 0.54 x 0.20 x 0.08 mm                       |
| Theta range for data collection   | 2.98 to 65.87 deg.                          |
| Limiting indices                  | -6 ≤ h ≤ 7, -8 ≤ k ≤ 9, -17 ≤ l ≤ 17        |
| Reflections collected / unique    | 8588 / 2439 [R(int) = 0.0583]               |
| Completeness to theta = 65.87     | 98.7 %                                      |
| Absorption correction             | Semi-empirical from equivalents             |
| Max. and min. transmission        | 0.7528 and 0.5323                           |
| Refinement method                 | Full-matrix least-squares on F <sup>2</sup> |
| Data / restraints / parameters    | 2439 / 1 / 191                              |
| Goodness-of-fit on F <sup>2</sup> | 1.043                                       |

Final R indices [ $I > 2\sigma(I)$ ]  $R1 = 0.0382$ ,  $wR2 = 0.0971$

R indices (all data)  $R1 = 0.0386$ ,  $wR2 = 0.0976$

Absolute structure parameter  $0.2(2)$

Extinction coefficient  $0.0060(16)$

Largest diff. peak and hole  $0.198$  and  $-0.246 \text{ e. \AA}^{-3}$

**Table 16.** Atomic coordinates ( $\times 10^4$ ) and equivalent isotropic displacement parameters ( $\text{\AA}^2 \times 10^3$ ) for s2180lc.  $U(\text{eq})$  is defined as one third of the trace of the orthogonalized  $U_{ij}$  tensor.

|      | x       | y        | z       | $U(\text{eq})$ |
|------|---------|----------|---------|----------------|
| O(1) | 5947(2) | 3292(2)  | 4181(1) | 18(1)          |
| C(1) | 3155(3) | 4361(2)  | 3164(1) | 15(1)          |
| O(2) | -162(2) | 5438(2)  | 2431(1) | 22(1)          |
| C(2) | 3397(3) | 5597(2)  | 3948(1) | 18(1)          |
| C(3) | 5585(3) | 5046(2)  | 4509(1) | 18(1)          |
| C(4) | 4597(2) | 3063(2)  | 3371(1) | 16(1)          |
| C(5) | 4920(3) | 1410(2)  | 2937(1) | 16(1)          |
| C(6) | 3169(3) | 413(2)   | 2536(1) | 19(1)          |
| C(7) | 3479(3) | -1129(2) | 2117(1) | 21(1)          |
| C(8) | 5556(3) | -1704(2) | 2108(1) | 24(1)          |

|       |         |         |         |       |
|-------|---------|---------|---------|-------|
| C(9)  | 7312(3) | -743(3) | 2520(1) | 26(1) |
| C(10) | 7004(3) | 808(2)  | 2930(1) | 21(1) |
| C(11) | 1423(3) | 4550(2) | 2379(1) | 16(1) |
| C(12) | 1598(3) | 3720(2) | 1498(1) | 17(1) |
| C(13) | -243(3) | 2969(2) | 994(1)  | 19(1) |
| C(14) | -154(3) | 2200(2) | 172(1)  | 23(1) |
| C(15) | 1751(3) | 2234(3) | -167(1) | 23(1) |
| C(16) | 3570(3) | 3008(3) | 322(1)  | 21(1) |
| C(17) | 3514(3) | 3723(2) | 1161(1) | 18(1) |
| C(18) | 7429(3) | 6141(2) | 4363(1) | 21(1) |
| C(19) | 8672(3) | 7004(3) | 5014(2) | 30(1) |

---

**Table 17.** Bond lengths [Å] and angles [deg] for s2180lc.

---

|            |          |
|------------|----------|
| O(1)-C(4)  | 1.367(2) |
| O(1)-C(3)  | 1.478(2) |
| C(1)-C(4)  | 1.354(2) |
| C(1)-C(11) | 1.465(2) |
| C(1)-C(2)  | 1.507(2) |
| O(2)-C(11) | 1.229(2) |
| C(2)-C(3)  | 1.542(2) |
| C(2)-H(2A) | 0.9900   |
| C(2)-H(2B) | 0.9900   |
| C(3)-C(18) | 1.489(2) |
| C(3)-H(3)  | 1.0000   |
| C(4)-C(5)  | 1.469(2) |

|              |          |
|--------------|----------|
| C(5)-C(6)    | 1.392(2) |
| C(5)-C(10)   | 1.398(2) |
| C(6)-C(7)    | 1.383(3) |
| C(6)-H(6)    | 0.9500   |
| C(7)-C(8)    | 1.387(3) |
| C(7)-H(7)    | 0.9500   |
| C(8)-C(9)    | 1.385(3) |
| C(8)-H(8)    | 0.9500   |
| C(9)-C(10)   | 1.381(3) |
| C(9)-H(9)    | 0.9500   |
| C(10)-H(10)  | 0.9500   |
| C(11)-C(12)  | 1.499(2) |
| C(12)-C(13)  | 1.394(2) |
| C(12)-C(17)  | 1.396(2) |
| C(13)-C(14)  | 1.386(3) |
| C(13)-H(13)  | 0.9500   |
| C(14)-C(15)  | 1.392(3) |
| C(14)-H(14)  | 0.9500   |
| C(15)-C(16)  | 1.383(3) |
| C(15)-H(15)  | 0.9500   |
| C(16)-C(17)  | 1.389(3) |
| C(16)-H(16)  | 0.9500   |
| C(17)-H(17)  | 0.9500   |
| C(18)-C(19)  | 1.321(3) |
| C(18)-H(18)  | 0.9500   |
| C(19)-H(19A) | 0.9500   |
| C(19)-H(19B) | 0.9500   |

|                  |            |
|------------------|------------|
| C(4)-O(1)-C(3)   | 108.01(12) |
| C(4)-C(1)-C(11)  | 129.13(15) |
| C(4)-C(1)-C(2)   | 108.89(14) |
| C(11)-C(1)-C(2)  | 121.64(14) |
| C(1)-C(2)-C(3)   | 101.91(13) |
| C(1)-C(2)-H(2A)  | 111.4      |
| C(3)-C(2)-H(2A)  | 111.4      |
| C(1)-C(2)-H(2B)  | 111.4      |
| C(3)-C(2)-H(2B)  | 111.4      |
| H(2A)-C(2)-H(2B) | 109.3      |
| O(1)-C(3)-C(18)  | 107.50(13) |
| O(1)-C(3)-C(2)   | 104.38(13) |
| C(18)-C(3)-C(2)  | 114.07(15) |
| O(1)-C(3)-H(3)   | 110.2      |
| C(18)-C(3)-H(3)  | 110.2      |
| C(2)-C(3)-H(3)   | 110.2      |
| C(1)-C(4)-O(1)   | 113.11(15) |
| C(1)-C(4)-C(5)   | 133.39(15) |
| O(1)-C(4)-C(5)   | 113.35(14) |
| C(6)-C(5)-C(10)  | 119.05(16) |
| C(6)-C(5)-C(4)   | 120.82(15) |
| C(10)-C(5)-C(4)  | 120.13(15) |
| C(7)-C(6)-C(5)   | 120.64(15) |
| C(7)-C(6)-H(6)   | 119.7      |
| C(5)-C(6)-H(6)   | 119.7      |
| C(6)-C(7)-C(8)   | 119.71(16) |
| C(6)-C(7)-H(7)   | 120.1      |
| C(8)-C(7)-H(7)   | 120.1      |

|                   |            |
|-------------------|------------|
| C(9)-C(8)-C(7)    | 120.23(17) |
| C(9)-C(8)-H(8)    | 119.9      |
| C(7)-C(8)-H(8)    | 119.9      |
| C(10)-C(9)-C(8)   | 120.11(16) |
| C(10)-C(9)-H(9)   | 119.9      |
| C(8)-C(9)-H(9)    | 119.9      |
| C(9)-C(10)-C(5)   | 120.24(17) |
| C(9)-C(10)-H(10)  | 119.9      |
| C(5)-C(10)-H(10)  | 119.9      |
| O(2)-C(11)-C(1)   | 120.00(15) |
| O(2)-C(11)-C(12)  | 119.35(14) |
| C(1)-C(11)-C(12)  | 120.62(14) |
| C(13)-C(12)-C(17) | 119.60(15) |
| C(13)-C(12)-C(11) | 118.23(14) |
| C(17)-C(12)-C(11) | 122.15(14) |
| C(14)-C(13)-C(12) | 120.04(16) |
| C(14)-C(13)-H(13) | 120.0      |
| C(12)-C(13)-H(13) | 120.0      |
| C(13)-C(14)-C(15) | 120.04(16) |
| C(13)-C(14)-H(14) | 120.0      |
| C(15)-C(14)-H(14) | 120.0      |
| C(16)-C(15)-C(14) | 120.12(16) |
| C(16)-C(15)-H(15) | 119.9      |
| C(14)-C(15)-H(15) | 119.9      |
| C(15)-C(16)-C(17) | 120.10(15) |
| C(15)-C(16)-H(16) | 120.0      |
| C(17)-C(16)-H(16) | 120.0      |
| C(16)-C(17)-C(12) | 120.03(15) |

|                     |            |
|---------------------|------------|
| C(16)-C(17)-H(17)   | 120.0      |
| C(12)-C(17)-H(17)   | 120.0      |
| C(19)-C(18)-C(3)    | 123.55(18) |
| C(19)-C(18)-H(18)   | 118.2      |
| C(3)-C(18)-H(18)    | 118.2      |
| C(18)-C(19)-H(19A)  | 120.0      |
| C(18)-C(19)-H(19B)  | 120.0      |
| H(19A)-C(19)-H(19B) | 120.0      |

---

Symmetry transformations used to generate equivalent atoms:

**Table 18.** Anisotropic displacement parameters ( $\text{\AA}^2 \times 10^3$ ) for s2180lc. The anisotropic displacement factor exponent takes the form:  $-2 \pi^2 [ h^2 a^{*2} U_{11} + \dots + 2 h k a^* b^* U_{12} ]$

---

|  | U11 | U22 | U33 | U23 | U13 | U12 |
|--|-----|-----|-----|-----|-----|-----|
|--|-----|-----|-----|-----|-----|-----|

---

|      |       |       |       |       |       |       |
|------|-------|-------|-------|-------|-------|-------|
| O(1) | 13(1) | 19(1) | 18(1) | -2(1) | -7(1) | 3(1)  |
| C(1) | 10(1) | 16(1) | 18(1) | -3(1) | -1(1) | -1(1) |
| O(2) | 14(1) | 26(1) | 25(1) | -2(1) | -3(1) | 7(1)  |
| C(2) | 14(1) | 17(1) | 20(1) | -4(1) | -2(1) | 1(1)  |
| C(3) | 15(1) | 20(1) | 17(1) | -4(1) | -4(1) | 0(1)  |
| C(4) | 8(1)  | 20(1) | 17(1) | 1(1)  | -3(1) | -3(1) |
| C(5) | 14(1) | 15(1) | 17(1) | 3(1)  | -1(1) | 2(1)  |
| C(6) | 12(1) | 20(1) | 22(1) | 5(1)  | -2(1) | -1(1) |



|       |       |       |       |        |       |       |
|-------|-------|-------|-------|--------|-------|-------|
| C(7)  | 20(1) | 18(1) | 23(1) | 1(1)   | -1(1) | -4(1) |
| C(8)  | 28(1) | 15(1) | 30(1) | -2(1)  | 7(1)  | 0(1)  |
| C(9)  | 16(1) | 22(1) | 42(1) | -3(1)  | 8(1)  | 3(1)  |
| C(10) | 12(1) | 19(1) | 31(1) | -1(1)  | -1(1) | 0(1)  |
| C(11) | 10(1) | 13(1) | 21(1) | 1(1)   | -3(1) | 0(1)  |
| C(12) | 12(1) | 16(1) | 19(1) | 1(1)   | -4(1) | 3(1)  |
| C(13) | 12(1) | 19(1) | 23(1) | 0(1)   | -2(1) | 0(1)  |
| C(14) | 18(1) | 23(1) | 23(1) | -4(1)  | -6(1) | -3(1) |
| C(15) | 23(1) | 25(1) | 20(1) | -3(1)  | -1(1) | -1(1) |
| C(16) | 15(1) | 24(1) | 24(1) | -1(1)  | 2(1)  | 2(1)  |
| C(17) | 12(1) | 16(1) | 22(1) | 1(1)   | -4(1) | 0(1)  |
| C(18) | 14(1) | 19(1) | 27(1) | -3(1)  | -1(1) | 2(1)  |
| C(19) | 13(1) | 32(1) | 43(1) | -16(1) | 2(1)  | -2(1) |

**Table 19.** Hydrogen coordinates ( $\times 10^4$ ) and isotropic displacement parameters ( $\text{\AA}^2 \times 10^3$ ) for s2180lc.

|       | x    | y     | z    | U(eq) |
|-------|------|-------|------|-------|
| H(2A) | 2218 | 5453  | 4294 | 21    |
| H(2B) | 3429 | 6811  | 3745 | 21    |
| H(3)  | 5502 | 5011  | 5164 | 22    |
| H(6)  | 1748 | 798   | 2551 | 22    |
| H(7)  | 2276 | -1793 | 1837 | 25    |

|        |       |       |      |    |
|--------|-------|-------|------|----|
| H(8)   | 5774  | -2761 | 1818 | 29 |
| H(9)   | 8731  | -1151 | 2521 | 31 |
| H(10)  | 8212  | 1468  | 3208 | 25 |
| H(13)  | -1559 | 2984  | 1214 | 22 |
| H(14)  | -1395 | 1649  | -160 | 27 |
| H(15)  | 1802  | 1725  | -735 | 28 |
| H(16)  | 4861  | 3051  | 83   | 25 |
| H(17)  | 4781  | 4214  | 1506 | 21 |
| H(18)  | 7727  | 6224  | 3770 | 25 |
| H(19A) | 8411  | 6945  | 5613 | 36 |
| H(19B) | 9828  | 7684  | 4883 | 36 |

---

**Table 20.** Torsion angles [deg] for s2180lc.

---

|                      |             |
|----------------------|-------------|
| C(4)-C(1)-C(2)-C(3)  | 14.66(17)   |
| C(11)-C(1)-C(2)-C(3) | -171.48(15) |
| C(4)-O(1)-C(3)-C(18) | -104.38(15) |
| C(4)-O(1)-C(3)-C(2)  | 17.11(16)   |
| C(1)-C(2)-C(3)-O(1)  | -18.63(16)  |
| C(1)-C(2)-C(3)-C(18) | 98.41(16)   |
| C(11)-C(1)-C(4)-O(1) | -177.88(16) |
| C(2)-C(1)-C(4)-O(1)  | -4.62(18)   |
| C(11)-C(1)-C(4)-C(5) | -2.7(3)     |
| C(2)-C(1)-C(4)-C(5)  | 170.54(17)  |
| C(3)-O(1)-C(4)-C(1)  | -8.32(18)   |
| C(3)-O(1)-C(4)-C(5)  | 175.51(12)  |

|                         |             |
|-------------------------|-------------|
| C(1)-C(4)-C(5)-C(6)     | -38.6(3)    |
| O(1)-C(4)-C(5)-C(6)     | 136.56(15)  |
| C(1)-C(4)-C(5)-C(10)    | 141.99(19)  |
| O(1)-C(4)-C(5)-C(10)    | -42.9(2)    |
| C(10)-C(5)-C(6)-C(7)    | -1.5(2)     |
| C(4)-C(5)-C(6)-C(7)     | 179.04(15)  |
| C(5)-C(6)-C(7)-C(8)     | 1.0(3)      |
| C(6)-C(7)-C(8)-C(9)     | 0.3(3)      |
| C(7)-C(8)-C(9)-C(10)    | -1.1(3)     |
| C(8)-C(9)-C(10)-C(5)    | 0.5(3)      |
| C(6)-C(5)-C(10)-C(9)    | 0.8(3)      |
| C(4)-C(5)-C(10)-C(9)    | -179.78(16) |
| C(4)-C(1)-C(11)-O(2)    | 154.56(17)  |
| C(2)-C(1)-C(11)-O(2)    | -17.9(3)    |
| C(4)-C(1)-C(11)-C(12)   | -27.6(3)    |
| C(2)-C(1)-C(11)-C(12)   | 159.87(15)  |
| O(2)-C(11)-C(12)-C(13)  | -42.0(2)    |
| C(1)-C(11)-C(12)-C(13)  | 140.22(16)  |
| O(2)-C(11)-C(12)-C(17)  | 136.18(17)  |
| C(1)-C(11)-C(12)-C(17)  | -41.6(2)    |
| C(17)-C(12)-C(13)-C(14) | 1.3(3)      |
| C(11)-C(12)-C(13)-C(14) | 179.49(16)  |
| C(12)-C(13)-C(14)-C(15) | -2.4(3)     |
| C(13)-C(14)-C(15)-C(16) | 1.2(3)      |
| C(14)-C(15)-C(16)-C(17) | 1.3(3)      |
| C(15)-C(16)-C(17)-C(12) | -2.4(3)     |
| C(13)-C(12)-C(17)-C(16) | 1.1(2)      |
| C(11)-C(12)-C(17)-C(16) | -176.98(16) |

|                       |             |
|-----------------------|-------------|
| O(1)-C(3)-C(18)-C(19) | -123.66(19) |
| C(2)-C(3)-C(18)-C(19) | 121.1(2)    |

---

Symmetry transformations used to generate equivalent atoms:

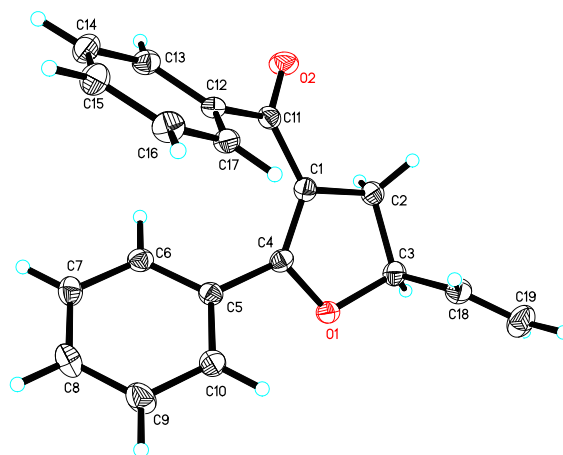

**Figure S17:** X-ray structure of compound (S)-4

**Table 21.** Crystal data and structure refinement for (S)-4.

|                             |                                                                                                                       |
|-----------------------------|-----------------------------------------------------------------------------------------------------------------------|
| Identification code         | s2182lc                                                                                                               |
| Empirical formula           | C <sub>19</sub> H <sub>16</sub> O <sub>2</sub>                                                                        |
| Formula weight              | 276.32                                                                                                                |
| Temperature                 | 100(2) K                                                                                                              |
| Wavelength                  | 1.54178 Å                                                                                                             |
| Crystal system, space group | Monoclinic, P 21                                                                                                      |
| Unit cell dimensions        | $a = 6.309(2)$ Å $\alpha = 90$ deg.<br>$b = 7.753(2)$ Å $\beta = 100.736(14)$<br>$c = 15.117(5)$ Å $\gamma = 90$ deg. |

|                                   |                                             |
|-----------------------------------|---------------------------------------------|
| Volume                            | 726.5(4) Å <sup>3</sup>                     |
| Z, Calculated density             | 2, 1.263 Mg/m <sup>3</sup>                  |
| Absorption coefficient            | 0.640 mm <sup>-1</sup>                      |
| F(000)                            | 292                                         |
| Crystal size                      | 0.41 x 0.37 x 0.31 mm                       |
| Theta range for data collection   | 2.98 to 65.60 deg.                          |
| Limiting indices                  | -4 ≤ h ≤ 7, -9 ≤ k ≤ 9, -17 ≤ l ≤ 16        |
| Reflections collected / unique    | 8149 / 2402 [R(int) = 0.0335]               |
| Completeness to theta = 65.60     | 96.6 %                                      |
| Absorption correction             | Semi-empirical from equivalents             |
| Max. and min. transmission        | 0.7528 and 0.6318                           |
| Refinement method                 | Full-matrix least-squares on F <sup>2</sup> |
| Data / restraints / parameters    | 2402 / 1 / 191                              |
| Goodness-of-fit on F <sup>2</sup> | 1.014                                       |

Final R indices [ $I > 2\sigma(I)$ ]     $R1 = 0.0234$ ,  $wR2 = 0.0573$

R indices (all data)                     $R1 = 0.0237$ ,  $wR2 = 0.0576$

Absolute structure parameter     $-0.03(16)$

Extinction coefficient             $0.0085(7)$

Largest diff. peak and hole     $0.112$  and  $-0.133 \text{ e. \AA}^{-3}$

**Table 22.** Atomic coordinates ( $\times 10^4$ ) and equivalent isotropic displacement parameters ( $\text{\AA}^2 \times 10^3$ ) for s2182lc.  $U(\text{eq})$  is defined as one third of the trace of the orthogonalized  $U_{ij}$  tensor.

|      | x        | y        | z       | $U(\text{eq})$ |
|------|----------|----------|---------|----------------|
| O(1) | 4054(1)  | 6709(1)  | 5822(1) | 20(1)          |
| C(1) | 6846(2)  | 5641(2)  | 6839(1) | 18(1)          |
| O(2) | 10165(1) | 4563(1)  | 7568(1) | 25(1)          |
| C(2) | 6601(2)  | 4406(2)  | 6050(1) | 20(1)          |
| C(3) | 4420(2)  | 4950(2)  | 5495(1) | 20(1)          |
| C(4) | 5397(2)  | 6933(2)  | 6627(1) | 17(1)          |
| C(5) | 5073(2)  | 8589(2)  | 7065(1) | 18(1)          |
| C(6) | 6831(2)  | 9587(2)  | 7464(1) | 20(1)          |
| C(7) | 6520(2)  | 11131(2) | 7884(1) | 22(1)          |

|       |          |          |          |       |
|-------|----------|----------|----------|-------|
| C(8)  | 4446(2)  | 11706(2) | 7893(1)  | 26(1) |
| C(9)  | 2685(2)  | 10747(2) | 7483(1)  | 28(1) |
| C(10) | 2996(2)  | 9190(2)  | 7068(1)  | 23(1) |
| C(11) | 8566(2)  | 5453(2)  | 7621(1)  | 18(1) |
| C(12) | 8397(2)  | 6281(2)  | 8502(1)  | 17(1) |
| C(13) | 10238(2) | 7028(2)  | 9007(1)  | 21(1) |
| C(14) | 10150(2) | 7799(2)  | 9827(1)  | 24(1) |
| C(15) | 8252(2)  | 7763(2)  | 10168(1) | 25(1) |
| C(16) | 6428(2)  | 6988(2)  | 9678(1)  | 23(1) |
| C(17) | 6487(2)  | 6274(2)  | 8840(1)  | 19(1) |
| C(18) | 2567(2)  | 3859(2)  | 5633(1)  | 23(1) |
| C(19) | 1331(2)  | 3001(2)  | 4986(1)  | 32(1) |

---

**Table 23.** Bond lengths [Å] and angles [deg] for s2182lc.

---

|            |            |
|------------|------------|
| O(1)-C(4)  | 1.3586(15) |
| O(1)-C(3)  | 1.4835(15) |
| C(1)-C(4)  | 1.3540(18) |
| C(1)-C(11) | 1.4553(18) |
| C(1)-C(2)  | 1.5143(17) |
| O(2)-C(11) | 1.2373(16) |
| C(2)-C(3)  | 1.5312(18) |
| C(2)-H(2A) | 0.9900     |
| C(2)-H(2B) | 0.9900     |
| C(3)-C(18) | 1.4894(19) |
| C(3)-H(3)  | 1.0000     |



|              |            |
|--------------|------------|
| C(4)-C(5)    | 1.4758(18) |
| C(5)-C(10)   | 1.3921(19) |
| C(5)-C(6)    | 1.3942(18) |
| C(6)-C(7)    | 1.386(2)   |
| C(6)-H(6)    | 0.9500     |
| C(7)-C(8)    | 1.385(2)   |
| C(7)-H(7)    | 0.9500     |
| C(8)-C(9)    | 1.384(2)   |
| C(8)-H(8)    | 0.9500     |
| C(9)-C(10)   | 1.391(2)   |
| C(9)-H(9)    | 0.9500     |
| C(10)-H(10)  | 0.9500     |
| C(11)-C(12)  | 1.4999(17) |
| C(12)-C(13)  | 1.3922(18) |
| C(12)-C(17)  | 1.3936(18) |
| C(13)-C(14)  | 1.3861(19) |
| C(13)-H(13)  | 0.9500     |
| C(14)-C(15)  | 1.390(2)   |
| C(14)-H(14)  | 0.9500     |
| C(15)-C(16)  | 1.385(2)   |
| C(15)-H(15)  | 0.9500     |
| C(16)-C(17)  | 1.3888(19) |
| C(16)-H(16)  | 0.9500     |
| C(17)-H(17)  | 0.9500     |
| C(18)-C(19)  | 1.313(2)   |
| C(18)-H(18)  | 0.9500     |
| C(19)-H(19A) | 0.9500     |
| C(19)-H(19B) | 0.9500     |

|                  |            |
|------------------|------------|
| C(4)-O(1)-C(3)   | 107.83(9)  |
| C(4)-C(1)-C(11)  | 129.35(11) |
| C(4)-C(1)-C(2)   | 108.43(11) |
| C(11)-C(1)-C(2)  | 121.88(11) |
| C(1)-C(2)-C(3)   | 101.96(10) |
| C(1)-C(2)-H(2A)  | 111.4      |
| C(3)-C(2)-H(2A)  | 111.4      |
| C(1)-C(2)-H(2B)  | 111.4      |
| C(3)-C(2)-H(2B)  | 111.4      |
| H(2A)-C(2)-H(2B) | 109.2      |
| O(1)-C(3)-C(18)  | 107.46(10) |
| O(1)-C(3)-C(2)   | 104.49(10) |
| C(18)-C(3)-C(2)  | 114.54(11) |
| O(1)-C(3)-H(3)   | 110.0      |
| C(18)-C(3)-H(3)  | 110.0      |
| C(2)-C(3)-H(3)   | 110.0      |
| C(1)-C(4)-O(1)   | 113.46(11) |
| C(1)-C(4)-C(5)   | 132.97(11) |
| O(1)-C(4)-C(5)   | 113.42(10) |
| C(10)-C(5)-C(6)  | 119.09(12) |
| C(10)-C(5)-C(4)  | 120.13(11) |
| C(6)-C(5)-C(4)   | 120.76(11) |
| C(7)-C(6)-C(5)   | 120.56(12) |
| C(7)-C(6)-H(6)   | 119.7      |
| C(5)-C(6)-H(6)   | 119.7      |
| C(8)-C(7)-C(6)   | 119.81(12) |
| C(8)-C(7)-H(7)   | 120.1      |

|                   |            |
|-------------------|------------|
| C(6)-C(7)-H(7)    | 120.1      |
| C(9)-C(8)-C(7)    | 120.26(13) |
| C(9)-C(8)-H(8)    | 119.9      |
| C(7)-C(8)-H(8)    | 119.9      |
| C(8)-C(9)-C(10)   | 119.96(13) |
| C(8)-C(9)-H(9)    | 120.0      |
| C(10)-C(9)-H(9)   | 120.0      |
| C(9)-C(10)-C(5)   | 120.28(12) |
| C(9)-C(10)-H(10)  | 119.9      |
| C(5)-C(10)-H(10)  | 119.9      |
| O(2)-C(11)-C(1)   | 119.80(11) |
| O(2)-C(11)-C(12)  | 119.29(11) |
| C(1)-C(11)-C(12)  | 120.89(11) |
| C(13)-C(12)-C(17) | 119.35(11) |
| C(13)-C(12)-C(11) | 118.38(11) |
| C(17)-C(12)-C(11) | 122.23(11) |
| C(14)-C(13)-C(12) | 120.12(12) |
| C(14)-C(13)-H(13) | 119.9      |
| C(12)-C(13)-H(13) | 119.9      |
| C(13)-C(14)-C(15) | 120.26(12) |
| C(13)-C(14)-H(14) | 119.9      |
| C(15)-C(14)-H(14) | 119.9      |
| C(16)-C(15)-C(14) | 119.83(12) |
| C(16)-C(15)-H(15) | 120.1      |
| C(14)-C(15)-H(15) | 120.1      |
| C(15)-C(16)-C(17) | 120.03(12) |
| C(15)-C(16)-H(16) | 120.0      |
| C(17)-C(16)-H(16) | 120.0      |

|                     |            |
|---------------------|------------|
| C(16)-C(17)-C(12)   | 120.33(12) |
| C(16)-C(17)-H(17)   | 119.8      |
| C(12)-C(17)-H(17)   | 119.8      |
| C(19)-C(18)-C(3)    | 123.75(13) |
| C(19)-C(18)-H(18)   | 118.1      |
| C(3)-C(18)-H(18)    | 118.1      |
| C(18)-C(19)-H(19A)  | 120.0      |
| C(18)-C(19)-H(19B)  | 120.0      |
| H(19A)-C(19)-H(19B) | 120.0      |

---

Symmetry transformations used to generate equivalent atoms:

**Table 24.** Anisotropic displacement parameters ( $\text{\AA}^2 \times 10^3$ ) for s2182lc. The anisotropic displacement factor exponent takes the form:  $-2 \pi^2 [ h^2 a^{*2} U_{11} + \dots + 2 h k a^* b^* U_{12} ]$

---

|  | U11 | U22 | U33 | U23 | U13 | U12 |
|--|-----|-----|-----|-----|-----|-----|
|--|-----|-----|-----|-----|-----|-----|

---

|      |       |       |       |       |      |       |
|------|-------|-------|-------|-------|------|-------|
| O(1) | 20(1) | 19(1) | 20(1) | -2(1) | 0(1) | 3(1)  |
| C(1) | 17(1) | 18(1) | 19(1) | -2(1) | 5(1) | 0(1)  |
| O(2) | 19(1) | 28(1) | 26(1) | -2(1) | 3(1) | 8(1)  |
| C(2) | 20(1) | 19(1) | 21(1) | -3(1) | 4(1) | 2(1)  |
| C(3) | 22(1) | 21(1) | 17(1) | -4(1) | 2(1) | 0(1)  |
| C(4) | 14(1) | 20(1) | 18(1) | 1(1)  | 4(1) | -2(1) |
| C(5) | 19(1) | 17(1) | 17(1) | 1(1)  | 3(1) | 1(1)  |

|       |       |       |       |        |       |       |
|-------|-------|-------|-------|--------|-------|-------|
| C(6)  | 18(1) | 20(1) | 22(1) | 4(1)   | 3(1)  | 0(1)  |
| C(7)  | 25(1) | 18(1) | 24(1) | 0(1)   | 5(1)  | -4(1) |
| C(8)  | 32(1) | 17(1) | 31(1) | -2(1)  | 13(1) | -1(1) |
| C(9)  | 23(1) | 23(1) | 42(1) | -4(1)  | 13(1) | 2(1)  |
| C(10) | 18(1) | 21(1) | 31(1) | -2(1)  | 4(1)  | 0(1)  |
| C(11) | 17(1) | 15(1) | 22(1) | 1(1)   | 4(1)  | 0(1)  |
| C(12) | 17(1) | 17(1) | 17(1) | 2(1)   | 1(1)  | 2(1)  |
| C(13) | 17(1) | 23(1) | 22(1) | 2(1)   | 3(1)  | 1(1)  |
| C(14) | 22(1) | 26(1) | 22(1) | -2(1)  | 0(1)  | -3(1) |
| C(15) | 29(1) | 27(1) | 18(1) | -3(1)  | 3(1)  | 0(1)  |
| C(16) | 20(1) | 27(1) | 24(1) | 0(1)   | 8(1)  | 1(1)  |
| C(17) | 17(1) | 19(1) | 20(1) | 2(1)   | 1(1)  | 0(1)  |
| C(18) | 19(1) | 24(1) | 27(1) | -3(1)  | 5(1)  | 2(1)  |
| C(19) | 20(1) | 36(1) | 41(1) | -15(1) | 7(1)  | -2(1) |

**Table 25.** Hydrogen coordinates ( $\times 10^4$ ) and isotropic displacement parameters ( $\text{\AA}^2 \times 10^3$ ) for s2182lc.

|       | x    | y    | z    | U(eq) |
|-------|------|------|------|-------|
| H(2A) | 6573 | 3192 | 6250 | 24    |
| H(2B) | 7777 | 4555 | 5705 | 24    |
| H(3)  | 4503 | 4987 | 4841 | 24    |
| H(6)  | 8254 | 9206 | 7447 | 24    |

|        |       |       |       |    |
|--------|-------|-------|-------|----|
| H(7)   | 7726  | 11793 | 8165  | 27 |
| H(8)   | 4231  | 12762 | 8182  | 31 |
| H(9)   | 1265  | 11152 | 7484  | 34 |
| H(10)  | 1785  | 8534  | 6786  | 28 |
| H(13)  | 11557 | 7009  | 8790  | 25 |
| H(14)  | 11392 | 8354  | 10157 | 29 |
| H(15)  | 8206  | 8268  | 10737 | 30 |
| H(16)  | 5136  | 6944  | 9914  | 28 |
| H(17)  | 5220  | 5779  | 8496  | 23 |
| H(18)  | 2261  | 3780  | 6224  | 28 |
| H(19A) | 1598  | 3056  | 4389  | 39 |
| H(19B) | 170   | 2325  | 5115  | 39 |

---

**Table 26.** Torsion angles [deg] for s2182lc.

---

|                      |             |
|----------------------|-------------|
| C(4)-C(1)-C(2)-C(3)  | -14.87(13)  |
| C(11)-C(1)-C(2)-C(3) | 171.19(12)  |
| C(4)-O(1)-C(3)-C(18) | 104.62(11)  |
| C(4)-O(1)-C(3)-C(2)  | -17.45(12)  |
| C(1)-C(2)-C(3)-O(1)  | 18.92(12)   |
| C(1)-C(2)-C(3)-C(18) | -98.37(12)  |
| C(11)-C(1)-C(4)-O(1) | 177.93(12)  |
| C(2)-C(1)-C(4)-O(1)  | 4.59(14)    |
| C(11)-C(1)-C(4)-C(5) | 2.7(2)      |
| C(2)-C(1)-C(4)-C(5)  | -170.64(12) |

|                         |             |
|-------------------------|-------------|
| C(3)-O(1)-C(4)-C(1)     | 8.45(13)    |
| C(3)-O(1)-C(4)-C(5)     | -175.36(10) |
| C(1)-C(4)-C(5)-C(10)    | -142.14(14) |
| O(1)-C(4)-C(5)-C(10)    | 42.64(16)   |
| C(1)-C(4)-C(5)-C(6)     | 39.1(2)     |
| O(1)-C(4)-C(5)-C(6)     | -136.11(11) |
| C(10)-C(5)-C(6)-C(7)    | 2.06(18)    |
| C(4)-C(5)-C(6)-C(7)     | -179.19(11) |
| C(5)-C(6)-C(7)-C(8)     | -1.27(19)   |
| C(6)-C(7)-C(8)-C(9)     | -0.2(2)     |
| C(7)-C(8)-C(9)-C(10)    | 0.8(2)      |
| C(8)-C(9)-C(10)-C(5)    | 0.1(2)      |
| C(6)-C(5)-C(10)-C(9)    | -1.45(19)   |
| C(4)-C(5)-C(10)-C(9)    | 179.79(12)  |
| C(4)-C(1)-C(11)-O(2)    | -154.48(13) |
| C(2)-C(1)-C(11)-O(2)    | 18.08(19)   |
| C(4)-C(1)-C(11)-C(12)   | 27.5(2)     |
| C(2)-C(1)-C(11)-C(12)   | -159.98(11) |
| O(2)-C(11)-C(12)-C(13)  | 41.75(17)   |
| C(1)-C(11)-C(12)-C(13)  | -140.18(12) |
| O(2)-C(11)-C(12)-C(17)  | -136.11(13) |
| C(1)-C(11)-C(12)-C(17)  | 41.96(18)   |
| C(17)-C(12)-C(13)-C(14) | -1.81(18)   |
| C(11)-C(12)-C(13)-C(14) | -179.73(12) |
| C(12)-C(13)-C(14)-C(15) | 2.9(2)      |
| C(13)-C(14)-C(15)-C(16) | -1.5(2)     |
| C(14)-C(15)-C(16)-C(17) | -1.1(2)     |
| C(15)-C(16)-C(17)-C(12) | 2.2(2)      |

|                         |             |
|-------------------------|-------------|
| C(13)-C(12)-C(17)-C(16) | -0.76(18)   |
| C(11)-C(12)-C(17)-C(16) | 177.08(12)  |
| O(1)-C(3)-C(18)-C(19)   | 123.69(14)  |
| C(2)-C(3)-C(18)-C(19)   | -120.72(15) |

---

Symmetry transformations used to generate equivalent atoms:



## 12. Computed Structures and Energies

\*\* All coordinates in atomic units (1 Bohr = 52.91772 pm) \*\*  
\*\* Energies in atomic units (1 Hartree = 27.2114 eV = 2625.5 kJ/mol) \*\*  
\*\* unless noted otherwise \*\*

DFT equilibrium structures  
-----

Functional: PBE

Basis set: def2-TZVPP' (def2-TZVPP with g function deleted)

Standard MOLPRO 2012.1 settings for grid and convergence, no density fitting

== DFT(PBE) S0 ==

!RKS STATE 1.1 Energy -1733.360499612880

|   |    |       |              |              |              |
|---|----|-------|--------------|--------------|--------------|
| 1 | FE | 26.00 | 0.000919967  | 0.000000000  | 0.377887191  |
| 2 | N  | 7.00  | 0.000616235  | 0.000000000  | 3.515450770  |
| 3 | O  | 8.00  | -0.000243338 | 0.000000000  | 5.774469393  |
| 4 | C  | 6.00  | 2.998552204  | 0.000000000  | -1.129057268 |
| 5 | O  | 8.00  | 5.000998269  | 0.000000000  | -2.085985030 |
| 6 | C  | 6.00  | -1.498998999 | -2.595198162 | -1.129280170 |
| 7 | C  | 6.00  | -1.498998999 | 2.595198162  | -1.129280170 |
| 8 | O  | 8.00  | -2.501423614 | -4.328421822 | -2.086665401 |
| 9 | O  | 8.00  | -2.501423614 | 4.328421822  | -2.086665401 |

with COSMO: eps=2.5 / f(eps)=0.5

!RKS STATE 1.1 Energy -1733.396901697604

outlying-charge corrected -1733.3988297691

|   |    |       |              |              |              |
|---|----|-------|--------------|--------------|--------------|
| 1 | FE | 26.00 | 0.439264784  | -0.000000000 | 0.508335874  |
| 2 | N  | 7.00  | -0.069957393 | -0.000000000 | 3.649094114  |
| 3 | O  | 8.00  | -0.832651617 | 0.000000000  | 5.718454654  |
| 4 | C  | 6.00  | 3.377209198  | -0.000000000 | -1.398629183 |
| 5 | O  | 8.00  | 5.150074396  | 0.000000000  | -2.662399212 |
| 6 | C  | 6.00  | -1.411618442 | -2.403750972 | -0.986843255 |
| 7 | C  | 6.00  | -1.411618442 | 2.403750972  | -0.986843255 |
| 8 | O  | 8.00  | -2.620352187 | -3.971228390 | -1.910147911 |
| 9 | O  | 8.00  | -2.620352187 | 3.971228390  | -1.910147911 |

with COSMO: eps=infty / f(eps)=1.0

!RKS STATE 1.1 Energy -1733.433448818465

outlying-charge corrected -1733.4372900406

|   |    |       |              |              |              |
|---|----|-------|--------------|--------------|--------------|
| 1 | FE | 26.00 | 0.000870345  | 0.000000000  | 0.387417122  |
| 2 | N  | 7.00  | 0.000481016  | 0.000000000  | 3.521243393  |
| 3 | O  | 8.00  | -0.000452780 | -0.000000000 | 5.779415725  |
| 4 | C  | 6.00  | 2.990223790  | -0.000000000 | -1.127942718 |
| 5 | O  | 8.00  | 4.983793759  | -0.000000000 | -2.094188233 |
| 6 | C  | 6.00  | -1.494634868 | -2.588193801 | -1.127981538 |
| 7 | C  | 6.00  | -1.494634868 | 2.588193801  | -1.127981538 |
| 8 | O  | 8.00  | -2.492824141 | -4.313745485 | -2.094554148 |
| 9 | O  | 8.00  | -2.492824141 | 4.313745485  | -2.094554148 |

== DFT(PBE) T1 ==

!RKS STATE 1.1 Energy -1733.299110756056

|   |    |       |              |             |             |
|---|----|-------|--------------|-------------|-------------|
| 1 | FE | 26.00 | -0.092964634 | 0.000000000 | 0.417659140 |
| 2 | N  | 7.00  | 0.567562711  | 0.000000000 | 3.746053097 |

|   |   |      |              |              |              |
|---|---|------|--------------|--------------|--------------|
| 3 | O | 8.00 | -0.672857877 | 0.000000000  | 5.678530812  |
| 4 | C | 6.00 | 2.896872518  | 0.000000000  | -1.174975631 |
| 5 | O | 8.00 | 4.719171879  | 0.000000000  | -2.443862833 |
| 6 | C | 6.00 | -1.431390152 | -2.722960968 | -1.052061424 |
| 7 | C | 6.00 | -1.431390152 | 2.722960968  | -1.052061424 |
| 8 | O | 8.00 | -2.277503091 | -4.517936300 | -2.049203911 |
| 9 | O | 8.00 | -2.277503091 | 4.517936300  | -2.049203911 |

== DFT(PBE) T2 ==

!RKS STATE 1.2 Energy -1733.282036224798

|   |    |       |              |              |              |
|---|----|-------|--------------|--------------|--------------|
| 1 | FE | 26.00 | 0.071080246  | 0.000000000  | 0.377628746  |
| 2 | N  | 7.00  | -0.312563037 | 0.000000000  | 3.804117604  |
| 3 | O  | 8.00  | 0.733964904  | 0.000000000  | 5.831574266  |
| 4 | C  | 6.00  | 3.254489035  | 0.000000000  | -0.770088349 |
| 5 | O  | 8.00  | 5.173266099  | 0.000000000  | -1.895200958 |
| 6 | C  | 6.00  | -1.680740369 | -2.311044474 | -1.259937137 |
| 7 | C  | 6.00  | -1.680740369 | 2.311044474  | -1.259937137 |
| 8 | O  | 8.00  | -2.779379199 | -3.874115119 | -2.403641560 |
| 9 | O  | 8.00  | -2.779379199 | 3.874115119  | -2.403641560 |

== DFT(PBE) D0 ==

!RKS STATE 1.2 Energy -1733.246849621230

|   |    |       |              |              |              |
|---|----|-------|--------------|--------------|--------------|
| 1 | FE | 26.00 | 0.437938693  | 0.000000000  | 0.505366761  |
| 2 | N  | 7.00  | -0.068428284 | 0.000000000  | 3.646486387  |
| 3 | O  | 8.00  | -0.825343686 | 0.000000000  | 5.718036106  |
| 4 | C  | 6.00  | 3.380006955  | 0.000000000  | -1.396974805 |
| 5 | O  | 8.00  | 5.157097646  | 0.000000000  | -2.654107868 |
| 6 | C  | 6.00  | -1.416123789 | -2.406115239 | -0.989169617 |
| 7 | C  | 6.00  | -1.416123789 | 2.406115239  | -0.989169617 |
| 8 | O  | 8.00  | -2.624512818 | -3.973987556 | -1.909796716 |
| 9 | O  | 8.00  | -2.624512818 | 3.973987556  | -1.909796716 |

with COSMO: eps=2.5 / f(eps)=0.5

!RKS STATE 1.1 Energy -1733.248143038234

outlying-charge corrected -1733.2480858666

|   |    |       |              |              |              |
|---|----|-------|--------------|--------------|--------------|
| 1 | FE | 26.00 | 0.439264784  | -0.000000000 | 0.508335874  |
| 2 | N  | 7.00  | -0.069957393 | -0.000000000 | 3.649094114  |
| 3 | O  | 8.00  | -0.832651617 | 0.000000000  | 5.718454654  |
| 4 | C  | 6.00  | 3.377209198  | -0.000000000 | -1.398629183 |
| 5 | O  | 8.00  | 5.150074396  | 0.000000000  | -2.662399212 |
| 6 | C  | 6.00  | -1.411618442 | -2.403750972 | -0.986843255 |
| 7 | C  | 6.00  | -1.411618442 | 2.403750972  | -0.986843255 |
| 8 | O  | 8.00  | -2.620352187 | -3.971228390 | -1.910147911 |
| 9 | O  | 8.00  | -2.620352187 | 3.971228390  | -1.910147911 |

with COSMO: eps=infty / f(eps)=1.0

!RKS STATE 1.1 Energy -1733.249664594353

outlying-charge corrected -1733.2495476369

|   |    |       |              |              |              |
|---|----|-------|--------------|--------------|--------------|
| 1 | FE | 26.00 | 0.438266310  | -0.000000000 | 0.507709324  |
| 2 | N  | 7.00  | -0.068450687 | -0.000000000 | 3.649159111  |
| 3 | O  | 8.00  | -0.832854601 | 0.000000000  | 5.717662314  |
| 4 | C  | 6.00  | 3.375037243  | 0.000000000  | -1.397755513 |
| 5 | O  | 8.00  | 5.148288647  | -0.000000000 | -2.661863355 |
| 6 | C  | 6.00  | -1.410140809 | -2.400551319 | -0.986372688 |

|   |   |      |              |              |              |
|---|---|------|--------------|--------------|--------------|
| 7 | C | 6.00 | -1.410140809 | 2.400551319  | -0.986372688 |
| 8 | O | 8.00 | -2.620003592 | -3.968692711 | -1.910646295 |
| 9 | O | 8.00 | -2.620003592 | 3.968692711  | -1.910646295 |

With functional PBE0

Basis set: def2-TZVPP' (def2-TZVPP with g function deleted)

Standard MOLPRO 2012.1 settings for grid and convergence, no density fitting

== DFT(PBE0) S0 ==

!RKS STATE 1.1 Energy -1733.231908495653

|   |    |       |              |              |              |
|---|----|-------|--------------|--------------|--------------|
| 1 | FE | 26.00 | 0.000870217  | 0.000000000  | 0.380884496  |
| 2 | N  | 7.00  | 0.000548642  | 0.000000000  | 3.457509662  |
| 3 | O  | 8.00  | -0.000246558 | 0.000000000  | 5.684726717  |
| 4 | C  | 6.00  | 2.973100491  | 0.000000000  | -1.112498206 |
| 5 | O  | 8.00  | 4.946003263  | 0.000000000  | -2.054371884 |
| 6 | C  | 6.00  | -1.486184264 | -2.573277054 | -1.112677897 |
| 7 | C  | 6.00  | -1.486184264 | 2.573277054  | -1.112677897 |
| 8 | O  | 8.00  | -2.473954709 | -4.280859918 | -2.055010538 |
| 9 | O  | 8.00  | -2.473954709 | 4.280859918  | -2.055010538 |

== DFT(PBE0) D0 ==

!RKS STATE 1.2 Energy -1733.130691912380

|   |    |       |              |              |              |
|---|----|-------|--------------|--------------|--------------|
| 1 | FE | 26.00 | 0.452009029  | 0.000000000  | 0.530957643  |
| 2 | N  | 7.00  | -0.128395527 | 0.000000000  | 3.597721730  |
| 3 | O  | 8.00  | -0.964670470 | 0.000000000  | 5.601681624  |
| 4 | C  | 6.00  | 3.340337968  | 0.000000000  | -1.460985099 |
| 5 | O  | 8.00  | 5.057802539  | 0.000000000  | -2.743112007 |
| 6 | C  | 6.00  | -1.367564966 | -2.499930961 | -0.935308307 |
| 7 | C  | 6.00  | -1.367564966 | 2.499930961  | -0.935308307 |
| 8 | O  | 8.00  | -2.510977749 | -4.089440877 | -1.817386680 |
| 9 | O  | 8.00  | -2.510977749 | 4.089440877  | -1.817386680 |

Summary of main bond distances (Aangstroem units) and angles (degrees)

PBE

|            | S0    | T1    | T2    | D0    |
|------------|-------|-------|-------|-------|
| -----      |       |       |       |       |
| E(rlx) [a] | ---   | -0.87 | -0.72 | -0.36 |
| Fe-N       | 1.66  | 1.80  | 1.82  | 1.68  |
| N-O        | 1.20  | 1.22  | 1.21  | 1.17  |
| Fe-C       | 1.78  | 1.79  | 1.79  | 1.85  |
| [b]        |       | 1.78  | 1.76  | 1.79  |
| C-O        | 1.17  | 1.18  | 1.18  | 1.15  |
| [b]        |       | 1.18  | 1.18  | 1.16  |
| Fe-N-O     | 180.0 | 136.1 | 146.3 | 169.1 |
| N-Fe-C     | 116.7 | 106.8 | 116.2 | 132.0 |
| [b]        |       | 120.3 | 115.5 | 110.4 |

[a] Relaxation energy relative to vertical excitation

[b] Cs symmetric structure: First row is bond (bond angle) in symmetry plane, second row pair of bonds (bond angles) that are mirror images of each other

PBE0

|       | S0   | D0   |
|-------|------|------|
| ----- |      |      |
| Fe-N  | 1.63 | 1.65 |

|        |       |       |
|--------|-------|-------|
| N-O    | 1.18  | 1.15  |
| Fe-C   | 1.76  | 1.86  |
|        |       | 1.81  |
| C-O    | 1.16  | 1.15  |
|        |       | 1.13  |
| Fe-N-O | 180.0 | 168.1 |
| N-Fe-C | 116.7 | 135.3 |

CASSCF:

|            | S0    | S1    | T1    | T2    | D0    |
|------------|-------|-------|-------|-------|-------|
| E(rlx) [a] | ---   | -1.00 | -0.76 | -0.82 | -1.07 |
| Fe-N       | 1.68  | 1.92  | 1.88  | 1.88  | 1.72  |
| N-O        | 1.18  | 1.21  | 1.20  | 1.20  | 1.18  |
| Fe-C       | 1.87  | 2.13  | 1.97  | 2.12  | 2.22  |
| [b]        |       | 2.04  | 2.05  | 2.03  | 2.18  |
| C-O        | 1.12  | 1.11  | 1.14  | 1.11  | 1.10  |
| [b]        |       | 1.13  | 1.12  | 1.13  | 1.10  |
| Fe-N-O     | 180.0 | 144.0 | 179.7 | 151.7 | 178.1 |
| N-Fe-C     | 116.3 | 101.4 | 153.1 | 98.1  | 126.0 |
| [b]        |       | 126.8 | 105.3 | 126.9 | 117.6 |

[a],[b] see above (DFT/PBE table)

MRCI calculations based on PBE structures

-----  
Active space is always 14 electrons in 9 orbitals (5 in a', 4 in a")  
CASSCF uses state-averaging over 5 states (singlets), or 4 states (triplets and neutral doublets)

S0 energies at PBE S0 structure

Q: Davidson correction

P: Pople correction

|        |              |
|--------|--------------|
| MRCI   | -1731.428254 |
| MRCI+Q | -1731.808903 |
| MRCI+P | -1731.909357 |

Vertical singlet excitation energies in eV

| state | CASCI | MRCI | MRCI+Q | MRCI+P |
|-------|-------|------|--------|--------|
| 2 a'  | 3.19  | 3.40 | 3.51   | 3.57   |
| 3 a'  | 3.22  | 3.48 | 3.64   | 3.72   |
| 4 a'  | 4.41  | 4.27 | 4.15   | 4.08   |
| 5 a'  | 4.87  | 4.82 | 4.75   | 4.71   |
| 1 a"  | 2.78  | 3.07 | 3.26   | 3.35   |
| 2 a"  | 3.17  | 3.41 | 3.55   | 3.62   |
| 3 a"  | 4.41  | 4.28 | 4.17   | 4.11   |
| 4 a"  | 4.24  | 4.31 | 4.34   | 4.36   |

Vertical triplet excitation energies in eV

| state | CASCI | MRCI | MRCI+Q | MRCI+P |
|-------|-------|------|--------|--------|
| 1 a'  | 1.76  | 2.12 | 2.32   | 2.46   |
| 2 a'  | 2.44  | 2.76 | 2.94   | 3.07   |

|       |      |      |      |      |
|-------|------|------|------|------|
| 3 a'  | 3.31 | 3.64 | 3.79 | 3.89 |
| 4 a'  | 3.54 | 3.85 | 3.98 | 4.08 |
| 5 a'  | 4.95 | 5.41 | 5.69 | 5.87 |
| 1 a'' | 2.44 | 2.77 | 2.96 | 3.09 |
| 2 a'' | 2.56 | 2.94 | 3.15 | 3.29 |
| 3 a'' | 3.54 | 3.85 | 4.00 | 4.10 |
| 4 a'' | 3.85 | 4.17 | 4.31 | 4.42 |

D0 energies at PBE S0 structure

MRCI -1731.359731  
MRCI+Q -1731.719366  
MRCI+P -1731.809112

D0 energies at PBE D0 structure

MRCI -1731.389292  
MRCI+Q -1731.744156  
MRCI+P -1731.831563

CASSCF equilibrium structures

-----

Active space is always 14 electrons in 9 orbitals (5 in a', 4 in a'')  
State-averaging over all states for which energies are quoted  
(opt) indicates state for which geometry optimization was run

== CASSCF S0 ==

|                         |                          |
|-------------------------|--------------------------|
| !MCSCF STATE 1.1 Energy | -1730.015514833774 (opt) |
| !MCSCF STATE 2.1 Energy | -1729.918912514030       |
| !MCSCF STATE 3.1 Energy | -1729.918176160312       |
| !MCSCF STATE 1.2 Energy | -1729.936200784939       |
| !MCSCF STATE 2.2 Energy | -1729.918179504321       |

|   |    |       |              |              |              |
|---|----|-------|--------------|--------------|--------------|
| 1 | FE | 26.00 | -0.000005123 | 0.000000000  | 0.363402310  |
| 2 | N  | 7.00  | 0.000062883  | 0.000000000  | 3.538006347  |
| 3 | O  | 8.00  | 0.000097210  | 0.000000000  | 5.776565653  |
| 4 | C  | 6.00  | 3.173351063  | 0.000000000  | -1.205681297 |
| 5 | O  | 8.00  | 5.137812993  | 0.000000000  | -2.013192464 |
| 6 | C  | 6.00  | -1.586721153 | -2.748162247 | -1.205743496 |
| 7 | C  | 6.00  | -1.586721153 | 2.748162247  | -1.205743496 |
| 8 | O  | 8.00  | -2.568939306 | -4.449389851 | -2.013369821 |
| 9 | O  | 8.00  | -2.568939306 | 4.449389851  | -2.013369821 |

== CASSCF S1 ==

|                         |                          |
|-------------------------|--------------------------|
| !MCSCF STATE 1.1 Energy | -1729.982944111080       |
| !MCSCF STATE 2.1 Energy | -1729.946780947037       |
| !MCSCF STATE 3.1 Energy | -1729.920384919964       |
| !MCSCF STATE 1.2 Energy | -1729.972853807584 (opt) |
| !MCSCF STATE 2.2 Energy | -1729.935905975993       |

|   |    |       |              |              |              |
|---|----|-------|--------------|--------------|--------------|
| 1 | FE | 26.00 | -0.195740782 | 0.000000000  | 0.564863223  |
| 2 | N  | 7.00  | 0.008030046  | 0.000000000  | 4.188436498  |
| 3 | O  | 8.00  | 1.452623545  | 0.000000000  | 5.960390854  |
| 4 | C  | 6.00  | 3.692569366  | 0.000000000  | -0.449973682 |
| 5 | O  | 8.00  | 5.721177180  | 0.000000000  | -0.988770543 |
| 6 | C  | 6.00  | -2.150169370 | -2.489920483 | -1.635673302 |
| 7 | C  | 6.00  | -2.150169370 | 2.489920483  | -1.635673302 |
| 8 | O  | 8.00  | -3.189161253 | -3.775594803 | -2.991362916 |

9 O 8.00 -3.189161253 3.775594803 -2.991362916

state energies with state-averaging over both singlet and triplet:

```
!MCSCF STATE 1.1 Energy -1729.985935371660 (S0)
!MCSCF STATE 2.1 Energy -1729.943104258666
!MCSCF STATE 3.1 Energy -1729.918249447044
!MCSCF STATE 1.2 Energy -1729.974099986737 (S1)
!MCSCF STATE 2.2 Energy -1729.934153143957
!MCSCF STATE 1.1 Energy -1729.982761065275 (T1)
!MCSCF STATE 2.1 Energy -1729.947850926034
!MCSCF STATE 1.2 Energy -1729.973100916846 (T2)
!MCSCF STATE 2.2 Energy -1729.949894592875
```

== CASSCF T1 ==

```
!MCSCF STATE 1.1 Energy -1729.990020295988 (opt)
!MCSCF STATE 2.1 Energy -1729.962349845576
!MCSCF STATE 1.2 Energy -1729.965227444419
!MCSCF STATE 2.2 Energy -1729.962354411238
```

|   |    |       |              |              |              |
|---|----|-------|--------------|--------------|--------------|
| 1 | FE | 26.00 | -0.000131315 | 0.000000000  | 0.760092391  |
| 2 | N  | 7.00  | 0.000654561  | 0.000000000  | 4.354400854  |
| 3 | O  | 8.00  | 0.000141944  | 0.000000000  | 6.630012520  |
| 4 | C  | 6.00  | 3.198874485  | 0.000000000  | -1.325738450 |
| 5 | O  | 8.00  | 4.914171145  | 0.000000000  | -2.581479216 |
| 6 | C  | 6.00  | -1.599595710 | -2.770077783 | -1.326087426 |
| 7 | C  | 6.00  | -1.599595710 | 2.770077783  | -1.326087426 |
| 8 | O  | 8.00  | -2.457260645 | -4.255341574 | -2.582119666 |
| 9 | O  | 8.00  | -2.457260645 | 4.255341574  | -2.582119666 |

== CASSCF T2 ==

```
!MCSCF STATE 1.1 Energy -1729.985645768347
!MCSCF STATE 2.1 Energy -1729.950754330550
!MCSCF STATE 1.2 Energy -1729.973711712628 (opt)
!MCSCF STATE 2.2 Energy -1729.951339366952
```

|   |    |       |              |              |              |
|---|----|-------|--------------|--------------|--------------|
| 1 | FE | 26.00 | 0.123433343  | 0.000000000  | 0.466637943  |
| 2 | N  | 7.00  | 0.798099079  | 0.000000000  | 3.961209142  |
| 3 | O  | 8.00  | 0.119113397  | 0.000000000  | 6.130120171  |
| 4 | C  | 6.00  | 3.907206777  | 0.000000000  | -0.834771680 |
| 5 | O  | 8.00  | 5.891051681  | 0.000000000  | -1.523104539 |
| 6 | C  | 6.00  | -2.091713353 | -2.480213594 | -1.457043497 |
| 7 | C  | 6.00  | -2.091713353 | 2.480213594  | -1.457043497 |
| 8 | O  | 8.00  | -3.327739730 | -3.768140342 | -2.632565064 |
| 9 | O  | 8.00  | -3.327739730 | 3.768140342  | -2.632565064 |

== CASSCF D0 ==

```
!MCSCF STATE 1.1 Energy -1730.035557829641
!MCSCF STATE 2.1 Energy -1730.019712230712
!MCSCF STATE 1.2 Energy -1730.074805310643 (opt)
!MCSCF STATE 2.2 Energy -1730.004886507394
```

|   |    |       |              |              |              |
|---|----|-------|--------------|--------------|--------------|
| 1 | FE | 26.00 | 0.187714015  | 0.000000000  | 0.725973912  |
| 2 | N  | 7.00  | -0.052689291 | 0.000000000  | 3.964657992  |
| 3 | O  | 8.00  | -0.292048538 | 0.000000000  | 6.180473532  |
| 4 | C  | 6.00  | 3.746662950  | 0.000000000  | -1.480569074 |
| 5 | O  | 8.00  | 5.603785236  | 0.000000000  | -2.412137105 |
| 6 | C  | 6.00  | -1.776310055 | -2.976010749 | -1.334493722 |

|   |   |      |              |              |              |
|---|---|------|--------------|--------------|--------------|
| 7 | C | 6.00 | -1.776310055 | 2.976010749  | -1.334493722 |
| 8 | O | 8.00 | -2.820403077 | -4.582651913 | -2.144268949 |
| 9 | O | 8.00 | -2.820403077 | 4.582651913  | -2.144268949 |

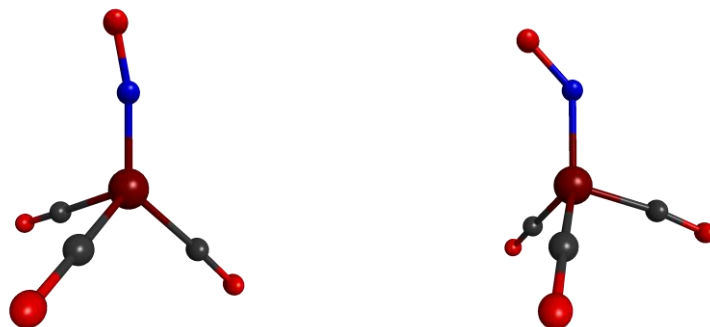

**Figure S18.** PBE/def2-TZVPP' calculated equilibrium structure in the  $D_0$  state (left) and the  $T_1$  state (right).

### **13. References**

- [1] R. K. Bowman and J. S. Johnson, *Org. Lett.* 2006, **8**, 573-576.
- [2] H. Braun and G. Huber, *Tetrahedron Lett.* 1976, **17**, 2121-2124.
- [3] D. Jacoby, J. P. Celerier, G. Haviari, H. Petit and G. Lhommet, *Synthesis* 1992, **9**, 884-887.
- [4] P. Gopinath and S. Chandrasekaran, *J. Org. Chem.*, 2011, **76**, 700-703.
- [5] P. Huang, R. Zhang, Y. Liang and D. Dong, *Org. Lett.* 2012, **14**, 5196-5199.
- [6] O. Itoh, N. Yamamoto, K. Nakano, T. Sugita and K. Ichikawa, *Bull. Chem. Soc. Jpn.* 1975, **48**, 3698-370.
- [7] H. Murakami, Y. Matsui, F. Ozawa and M. Yoshifuji, *J. Organomet. Chem.* 2006, **691**, 3151-3156.
- [8] E. G. Harris and R. G. Fayter, Jr., National Distillers and Chemical Corp., USA . 1987, pp. 11 pp. Cont.-in-part of U.S. 14,515,978.
- [9] E. Baciocchi and R. Ruzziconi, *J. Org. Chem.* 1991, **56**, 4772-4778.
- [10] M. Lau, M. Sher, A. Villinger, C. Fischer and P. Langer, *Eur. J. Org. Chem.* 2010, 3743-3753.
- [11] B. M. Casey, C. A. Eakin, J. Jiao, D. V. Sadasivam and R. A. Flowers, *Tetrahedron* 2009, **65**, 10762-10768.
